# Supplementary material for: Toward an autism-friendly environment based on mobile apps user feedback analysis using deep learning and machine learning models
Source: PeerJ Comput Sci. 2023 Aug 9;9:e1442. doi: 10.7717/peerj-cs.1442 (PMC10495947; doi:10.7717/peerj-cs.1442)
Supplement: Supplemental Information 1 [file peerj-cs-09-1442-s001.xlsx]

## Sheet: Feuil1
content	score
This app can be very motivating. It would be nice if there was a way to check off a task for more than 1 day. I use the app as a reminder for my chores, but I don't need to do all chores everyday. I'll forget whether or not I have done a chore, so it might get done twice or not at all. Of course that's my personal problem lol, but if I could check off a task for more than one day, it would help t…	5
great app. but there is a sound problem. i cant hear anything on my phone even tho i picked audio themes	4
Just downloaded yesterday, so far so good. I just wish I could customize the date options a bit more. For example, I would like to do a task 2-3 times a week, and the only way I can currently put it into the habit tracker is by selecting the specific days to do the task on, which isn't realistic for me. I'm also using this for cleaning tasks, one I'd like to do biweekly, which also isn't an optio…	4
The app has a potential! It will be nice if the app works even you are offline and will just sync when the internet is available. Thanks and have a great day!	5
Really enjoyed Habitica. I've used a few of the habit apps now but all seem to fall short in crucial areas. I think the actual layout is exceptional on this, once you get the idea behind habits, dailies and todos it becomes so quick to add things in and is definately one of the easier apps to maintain. The gaming aspect is fun and does make it more interesting a draw. My main niggle is that there…	4
Can you make this Offline	3
This app is great, I just want to request an update that would keep me tracking my habits and dailies even I am offline. Also, I would also love if you improve the widget version of the habits so that it wouldn't need much space in my screen just like the widgets in "to do's and dailies."	5
I love this app, doesn't encounter any bug yet. There is one thing that I think will help the user experience even more. Instead of streaks, why not have a statistics like data such as line graph to see the fluctuations of a non-linear progress of a habit.	4
I've had the app for more than two years. The quest feature is great for staying motivated. The to do list widget and support of markdown are also big advantages. I wish there was a better feature for getting an overview of how we've done in a week, like with charts and graphs. Another suggestion is adding a Pomodoro timer for each task.	4
Please make all tasks in to-do can be archived, not only the last 30	2
great.	5
Teu tiasa backup pdf csv	5
I only tried it for about 10 minutes but I hated the sounds. That's the main thing i wanted.	3
A really good app for planning to do list and future goals.	5
Started great! After a few days the notifications completely stopped which after going through the trouble of adding in reminders and to dos at specific times is quite disappointing. Great concept but sadly needs more work	2
There's no good way to set up a task that you want to do once a week but on any day. You have to specify a specific day and you lose points if you don't do it on that day. It's sort of mind-blowing that this feature doesn't exist, as it seems very basic.	1
Love this app so much! it's better than other apps which let you only add 1-3 tasks then ask for monthly payments to add more.	5
This is literally the best todo list and Tasks app ever. Delivers 100% of what it promises.	5
It is very good but need to get more analytical with the habits, daylies and to dos... More statics please!	5
So much fun! It sucks that you have to pay for gems but there's a lot that you can do without them. This app has definitely helped me get my life back on track.	5
Good for people who want to develop daily habits. Not so good for weekly habits.	2
Helped me so much. I'm keeping this forever. It's helped me be more productive and live a better life. Thank you so much!	5
It's a nice concept, but there's too much information given at once for setting it all up. Might try it again in a while though, to if it changed	3
These are good for kids who are turning to adults. Making the "real world" still fun to live in.	5
An incredible app Great note taking features Great at gamifying tasks And you can add code to extend features Not that you'd need to	5
Can we have much more difficult bosses. Most of the bosses do around 4.9 damage for an entire day and that is pretty underwhelming, when you commit to a boss your commiting to finishing more tasks and completing your to dos more often, maximise the amount of damage you can do so you'd get a reward and feel satisfied. But when it comes to most bosses they don't pose an immediate threat, its underw…	3
Nice for a gamer procrastinator! I accept the Challenge.✌️	5
It's really fun and has done wonders for the things I have wanted to do. Even if you are not into the gaming,.it just keeps the things you want to do in one place. I love it.	5
Eh	3
I love this app, enthusiasm for all developers in developing this application! 🔥	5
useful	4
Great concept but can be gamified more.	5
This app has given me the boost to my drive allowing me to complete a lot more. There's a few minor quality of life changes that could make it better like: adding different color tabs for each task based on it's difficulty (i.e. trivial=yellow; easy=orange; etc.). Hope to see this app grow and reach more people the way it's reached me and my friends.	5
Gamify task and habit tracking! ADHD friendly	5
Hello devs!! Great app by the way. Can I ask to add a built-in calendar and a better to-do interface. Im on my early programming, I may be able to contribute to this. I think it needs to have more features.	5
Notifications don't work, I think they are essential to what the app proposes to do. With notifications this would be 5 stars.	3
Good app but it is confusing	2
Totally recommend to anyone who really need to list things in everyday life. Totally love it. Easy to use and many features.	5
Some things change the way you look at your habits. Anyone who is clear about their passion can use this as a weapon to work towards ur goals, which help u to stay in touch with ur passion every single day. I got overwhelmed in the initial stage and couldn't use this properly cuz I had no idea what I was going to do with my life. once I got clearer about, since then I've been using this to align …	5
A perfect app if u want self-improvement	5
friggin love it! i have bad memory, but this app is so good. i'm using it for challenges on my blog.	5
This app interferes with my built in alarm app. I have a Google Pixel 6 Pro. If I set a task with a reminder, it sets an alarm that I cannot manage in the clock app and blocks me from opening my clock app to set other alarms. I had to delete the reminders and force stop the app to gain access to my alarms again. The reminders need to be a notification from this app not an alarm set on my built in…	2
It looks super good but i can't figure it out how to use it	2
Allows me to track dailies, but doesn't connect them to habits. I would expect that completing your dailies translates into building the desire habit. The tool gives no option to associate the 2 and you cannot see your performance history, so it's unclear which I should be focusing on.	2
It's a very good app if you want build need habits, but unfortunately don't have a version for smart watch, and I can't use the phone in my work, I love the app but need a version for smart watch	3
Absolutely amazing app. Easy to use. 10 stars ;))	5
This is the best app on my phone. I love this, and it helps me do my tasks. To whoever made this, thank you.	5
I love the idea for this app. I've tried it several times throughout the years but I need the notifications and they have NEVER worked for me. I'll uninstall it for like the fifth time again I guess.	2
I love it except, and this is a big issue for me, it's totally server based. Want to update anything, but have a bad internet connection? Too bad, it's either going to take forever or fail. I would use and maybe even pay for this app to just have a way to have everything first be saved on my device. So, back to hunting for a to-do app. Edit 3/23: I have to drop my review on this to 1 star. You ca…	5
Habitica is a super cool concept developed by people who know what they're doing in terms of code and game design, but fall short on UX design specifically for the app. There are so many features, it's hard to organize them well in the app. Highly recommend the desktop version, still recommend this app but just not as much.	4
Habitica is amazing	5
Great app but one problem. You should provide pro-version elements of game if a player reaches a certain level (let's say around 150) 🙏🙏	3
A strong three and a half. It definitely helps me with managing and doing tasks, to an extent. It REALLY helps me most on my daily tasks (like taking meds, brushing my teeth). However, after using it awhile, it does seem to plateau. I do recommend as it's quite helpful, but ultimately feels a little lacking. I would love to see the ability to trade items with your party, and to be able to use you…	3
This is amazing. Its so cool, a rpg but with doing habits is the way to level up and attack bosses is amazing! If I could add one thing to this it would be customisable achevments One example is [grass slayer] where you mark it on a habit that's to mow the lawn and you can set the goal amount at 100 meaning you need to check off that habit 100 times This achevent system will rather need a self ch…	5
I've never seen a worse app. They decided to ban me randomly without providing any real reason to do so. I got a "you violated our community guidelines" message but wasn't told what exactly did I do wrong. I literally never joined any guilds and the only message I sent was to request someone to explain how guilds work because I was new without using any coarse language,of course. And then, the ba…	1
Best planer for past gamers‼️	5
Kindly create an MPESA payment method? I've just downloaded the app but MPESA is the most common , convient and widely used payement method in my country. I am unable to access the customised plan Because the payments options there are not the ones I have . Kindly get back ASAP as I'd like to start my July with the app to determine if ill use it for the remaining half of the year . Regards, P	1
I love this app for productivity! The only thing I would like is a wiget so I can access my tasks quicker	4
Good idea, worst realization. Not intuitive to use, I spent a lot of time trying to figure out how to delete automaticly set habits (I could not). I am sorry for my time	2
The user experience is terrible. I just couldn't figure out how to get a daily habit going. Never got a reminder after I created a task a month or more ago. I may have not set it up correctly but that's the user experience problem. It's not intuitive at all. I'm willing to try it again if the design and ux changes and it becomes more intuitive	2
Would be great if there was a 100% offline version of this, which did not require an account, because what I do in my life is none of this company's business. It has a privacy policy, but it's completely worthless without having a way to verify what they promise is true, which there isn't. That's not to mention that they give data on you to advertisers and other unnamed "third parties", who could…	2
It changed my life	5
Sure it gamifies your tasks, but it doesn't remind you of anything. Your app is useless if it doesn't actually do anything to help you remember to do your tasks...	1
I was skeptical at first, but this app has proved a lot more useful than I thought it would be. The best feature is how it simultaneously allows for customization and depth of content. There are various features that you are free to use as little or as much as you want to, depending on your needs. This makes for a fun, challenging, yet also low-pressure environment to give you a boost on improvin…	5
I've had this app for almost 3 years and I can sincerely say that it's borderline perfection. You can customize it to your hearts content, the motivation potential is massive, a great example of this is my tasks to deal with projects, to-dos, learning, exercise, and so much more every single day. It's basically the only reason I'm even close to a high schooler/pseudo college student depending on …	5
Please make rewards history available.	5
Exceptional! Good concept, very adictive	5
Amazing app!!! I have only one suggestion and that is it would be nice to have bio's for our profiles that can be seen by our fellow party members. I feel it would bring more character and information to our profiles.	5
I'm really not a fan of how all the black hairstyles are premium content and require you to pay money. Otherwise decent app.	3
Lag	2
You should remove fix character values from the app. It is only making this app worse and people are having easy free money.	2
Widget doesn't update automatically everyday unless I open the app.	3
Even cant enter the app has bugs when i want to register nothing happens	3
Really love the concept of this app. It's fun and motivating	5
Great way to get organized and have fun	5
As someone with adhd who never has people over I struggle to do chores because there is no reward I care about enough to force myself to do the task. This app has gone a LONG way towards helping my motivation.	5
It is good with the day tasks. But there is no game part	2
Would be full start except I can't make my character a man lol	4
I really love it. But can you please add a undo botton so that you can undo what you might have clicked accidentally. Thanks and one more thing, make it offline when doing the task.	4
Love the idea but it's unusable to me without being able to set reoccurring tasks with a different date that the item appears to it's due date. Eg a weekly task that appears on Monday and needs to be done by Sunday then reappears in two weeks. I'm planning on an extensive list of things some of which only need to be done monthly or 3 monthly so it's no good seeing them constantly in grey when it'…	4
Nice little app to gamify my life and actually get me productive. Only just started using it but seems pretty cool. There will be probably some features I'd like to recommend, maybe be able to follow and see friends progress. Thanks	4
Really useful and fun application to get all your task done ! Really pushing myself with this to lvl up!	5
It's the best app if you want to get organized but never seem to succeed.	5
A great app that will greatly help people especially gamers who wanted to build consistency, schedule or routine into their daily lives. As a gamer who's constantly having a hard time with focusing on my routines and schedules, this app greatly help me organized my daily scheds and routines. This app also made me feel like my life is game hahaha. Like a sim simulator or something. It really fuele…	5
It's fun	5
I love this app. First time I'm motivated to get things done. Who thought gamifying my life would make me do things? Some minor glitches, but otherwise brilliant. There are so many people supporting you, challenges, guilds, quests, and more, it really does make me get stuff done and focused on remembering things.	5
Why I have to create a account ? Why the game is online ?	1
I like the app and have been using it for about a week but every time I do something it crashs Edit:they got back to me asap and fixed it. I use it all the time even now and even got a new mission.	5
I love that you can gamify your tasks. It makes it more fun.	5
Started using this app yesterday, and I already subscribed. I feel like this will be life changing.	5
Love it!	5
Love you for creating this app! It organize all my life habits , daily work and to do. A big thank you and hug to the developer for making this app	5
I can't login to android version or register on it	1
Few to no ads, simple and easy to use. I can't think of any complaints at the moment.	5
Couldn't hit the finish arrow after I made my character. Waste of time.	1
It's not really working for me, but it will probably help many other people :)	4
😘	5
Very helpful, but could you please also add challenge completion mentions on profile info? (Which challenge maker is allowed to give away) to everyone who participated and completed the challenge so as to increase the motivation to complete a challenge, inspite of slim chances of winning gem due to many participants? Edit - Thank you for the form and reply	5
Great app but I recommend having an UNDO button and checking the stats (on your phone) such as the overall counter of habits/dailies to be able to track them not just daily/weekly/monthly	4
It's a fun way to get a family or group of friends to work together to better themselves. Set daily tasks, habits you want to form, to do lists, and level up your adventurer. There's the option to pay for items that can make your game move faster, but if you remember your goal for self improvement should be a marathon instead of a sprint, it's easier to take your time and enjoy the grind.	5
Truly life changing! I was hesitant at 1st, due to the pixillated images, but this is the most motivating app I've ever come across. You can be lazy or productive, it doesn't judge, but trains you over time to be accountable. Having adhd, depression & anxiety, my time management & level of procrastination is dreadful to say the least! It's made me over 50% more productive in a week, & made some f…	5
It crashes	2
A bit too fancy, perhaps a "simple mode" will do. Also need an easier way to set XP. And a bug: Ticking and unticking keeps increasing the streak	4
I was in a really dark place and this app helped me turn my life around. I am so very much grateful to the developers.	5
A perfect app for people who wants to plan their life but can't really seem to get started. Design is intuitive and simple, makes planning and completing task just a tiny bit more motivating and that's all that I needed. The avatars' sprites could improve in the clarity and quality just a tiny bit but overall everything works fantastically.	5
Very good app but a little bit laggy - takes time to show To-Do's or Dailies/any type of list. Also it has so good reward function that truly motivates you to do things. It is great app.	5
Came back here to give a 5 star. Habitica is a must have if you really want to tap into your reward syste. Having a bad habit and want to replace it with game like rewards? No motivation on doing tasks? Have a task/duty that you feel as a grind, which is unavoidable and necessarry, but not motivated anymore to carry it out? Use habitica. The best way to deal with grind and demotivation. I highly …	5
This app helped me to find new problems to solve by making the ideas more repeatable each day or each week, eases on the stress that comes with planning out every minor routine for the day, and overall is a useful app for updating and staying on track	4
I really love this app, but so bad that the notification did not activated online or there some limitation playing offline. This is so disappointing to me because I like to go offline (airplane mode) so that I can be more productive, and that would be amazing if the feature help me out. Edit: giving more stars because developer respond is good	5
Tends to make u productive in a different ways My advice keep it simple and don't join guilds	5
Best productivity app I tried. It is the only one that fill all my needs. The quests are not that challenging once you reached level 100, new content in that regard would be great	5
Wish there is a way to add sub-lists under one task, something like Steam's number tap, like a loading bar. You can see the task's progress, tap the task and look what you've done and what you're still missing I also wish you can rearrange the list, doesn't have to be by name but anything	2
The best App i have ever usex	5
It's a great app but I would love an offline feature!	4
Im loving it so far. Though, I have and idea on how to improve things... maybe add a time limited daily task (e.x 05/06/22 to 06/06/22). I think it'd helpful for temporary daily things! And also the ability to pause certain dailies would be nice	5
Keeps telling me I'm not connected to the internet when I clearly am. Have to disconnect my WiFi in order to use this and it's really annoying.	1
As soon as I did the update my acct. was gone. What happened?	1
It's really cool and you know what? It actually made me change and I keep studying and doing everything on my schedule. Before I was a really lazy kid, and I don't study that much but now, wow it really changed me! I hope you make more applications like this.🙂🙂🙂	5
Great potential, but ultimately pointless for me as it won't send me the reminders to complete my tasks unless I open the app in the morning and even then some won't trigger.	2
I love this. This really helps and makes stuff you dislike, like. One thing that did bug me is the paid rewards. I think there should be a donation system where you get your money.	4
This is truly the best app! It's been months and I still haven't lost interest. I particularly love to collect pets, but in general I love all of the app. I got the subscription, but also without it you can do plenty! Also, having just one member of the party having a subscrition is enough if you just want some cool and different quests. I love the flying pig, by the way. It's my favourite.	5
Great so far, but I have a question. I cannot figure out how to feed my pet. I know that the in-app text says to go to the "Pets & Mounts" tab, but whenever I go there I don't see food, nor do I see an option to feed my pet when I click on them. This may be important: I only have the Special Pets, so I don't know if feeding them is different or nonexistent.	5
Lagu diantara gadis Amira Berakas volume Kota Kinabalu Pantai Jerudong Specialist Centre	5
Amazing	5
I really like this app, I just can't figure out how to edit or delete individual tasks?	5
Absolutely love it, I have used habitica more than any other task management app	5
A very good app for tracking your habits, though one of my criticisms is that the app itself is too gamey for my liking. The point of having habits is to stick to them not to be distracted by a game.	4
Easily the best game planner. Keeps getting better and better. Used it for 5 years.	5
Surprisingly motivating. It literally turns things you don't want to do into fun experience points	5
I like it's concept	5
This game is what ever you make of it. You have so many different possibilities. I thank the creative people who thought of and had the willingness to make this game.	5
Really fun to use. Motivates me to do my tasks so I can level up.	5
The various methods of task management (habits, dailies, to-dos) and their parameters are excellently designed, as is the UI in general. It's all very easy to set up, and rewarding to use. My biggest gripe is more of a personal preference which many might not share: the RPG-like mechanics of hatching monster eggs, feeding your pets etc can be a bit bothersome (and kinda tacky tbh), and I find the…	4
i want to use the to-do page, but it feels unsatisfying because the tasks always turn red in a few days, so your to-do page can easily become a wall of red that you don't want to look at. it would be much better if they only turned red when they're past the due date. a fairly small complaint, the app is very good	5
It would be nice to be able to check out the app before signing up. I don't want to make an account for yet another app if I don't end up using it.	3
Stop wasting time gamifying stuff thay doesn't need to be gamified and go do your habits instead of this game	1
I've been using Habitica for about two months now and I've found it to be incredibly useful in helping better structure my daily routine. The interface is user friendly. I appreciate the balancing of keeping track of goals doesn't foster a habit in sinking too much time into the app.	5
Exceptional	5
Has done a miraculous job getting me to do the things I never used to do. I have terrible self control so having this means I have developed a much more healthy lifestyle and complete the tasks I need to complete on time.	5
I really like the UI but the reorganization of tasks is a little messed up. Otherwise it's awesome!	4
Great game until you have one bad day and essentially if you lose all your health they take away a level, all your equipment and gold. Pretty bad game mechanics, made me feel so bad I honestly just deleted it there. The game is suppose to be made to support you but really is made to work hard to get nothing and if you slip up you get it all taken away. Don't use if you are even slightly sensitive…	2
Seems cool but my reminder notifications are not turning up even though my notifications for the app are on 😣	2
i love that it's gender neutral, but can u pls add more feminine options ? especially the hair ! (i have pastel pink hair) i love the concept, but i wish there was a version with a bigger focus on the dress up aspect (and prettier options). that would be my ideal app !	3
Please add a progress bar feature as well. To note the progress of a task.	4
Very nice	5
Fun easy way to manage everyday habits and scheduling. Gets repetitive sometimes, but it's very helpful.	5
There are lot of bugs in the app and it is a little complex to use.	1
No ads, open source and does really help track your habits I have a party doing quests with my fiancee and siblings It's motivational, I've been using it for several months	5
The best productivity app ever. It's simulate the feelings of doing fun daily chores or daily quests in games, you always feel rewarded or punished if you dont do it	5
I love the idea of this app and I've been using it a lot but what bothers me the most about it is the coin distribution and the distribution of information about the app. I've set my habits, to-do lists etc and I've been checking in and ticking them off consistently and yet I've died three times from losing health. I had to Google how to buy health. When I first died I lost lots of coins because …	3
Отлично для того, чтобы упорядочить свою жизнь, все получится если следовать своим же правилам. Предлагаю сделать древу навыков с атрибутами, ветками и навыками. Через атрибуты строятся ветки(владение мечом, единоборства, баскетбол, чтение книг, математика, и т.д.), которые пользователь создаст сам для того, чтобы видеть свой прогресс. Навыки тоже создаются пользователем, к примеру изучить какой …	5
Its great productivity app but not the one that motivates me or to fun to use personally. The game theme is cool but not one I enjoy. I like the original task apps better with all neat features since this one doesn't really have any.	3
This lets you complete chores and tasks in real life and make a game out of it!	5
Very cool app for procrastinators and RPG lovers. I would just love to have a few additions. On the 'to do' list, divide into main quests and side quests. This way we can have a list of important things, such as work tasks etc, and the side quests can be smaller tasks like cleaning the house. Also it would be nice to schedule reminders and deadlines in an hourly way. Like getting a notification t…	4
hg	5
I have never met an app more useful for my adhd, there is a category for every kind of task, love the rating and checklists too	5
I found myself writing to do lists all over my arm and on random paper, very disorganized and hard to keep up with. It was stressful and a lot of times i didnt feel like i did everything i needed to. This app is awesome cause now all my random to dos can be in one place AND organized into categories. Super helpful to ocd and keeping track of those long term projects. as an artist i have a lot of …	5
I REALLY REALLY LOVE this app! This really keeps me up and running for tasks that I really dislike doing but have to do. Just a little thing to ask? DEVS please! Make an offline mode for this app, and I'm also experiencing a bug where everytime I try arranging tasks manually by row, they teleport to another row... Otherwise everything else is really handy dandy!	4
Okay I usually don't leave reviews but first, this is already amazing. I just started character customization and they let you pick out a wheelchair! Most other games would never include this.. this means alot so I can make my character look like me. It is also fun that I get to have "pets" while I make sure I'm doing what I actually need to do in real life.	4
It is very complicated app	3
This app is really useful and has definitely helped motivate me to create better habits. The modern design is beautiful as well. I would definitely recommend Habitica for those who want to form good habits, get rid of bad ones, and have fun along the way! Gamifying tasks and habits really works!	5
Beautiful app. Helped me improve in several things. Recommended 100%	5
I deeply recommend this app. It's helped me organise in a fun easy way! Plus the people are lovely once you get your footing in the features and chats/guilds!	5
This was the exact app I was looking for. I was actually thinking of creating my own until I saw this. No need spending hours on coding now. 😆. Loving the SNES RPG style characters. Best part is that there are no ads (that I've seen so far). I feel like the engineers really took their time designing this app to help others. Impressive enough for me to write my first review ever (I think) in the G…	5
Great app, slow progress	4
It's an okay app, but it isn't usable offline. That's the only downside.	3
Cool app, unique design and style. Good for gamers. However your app doesnt work offline, everytime i turn off internet and open the app to check off dailies it simply crashes and i had to relaunch it again. Also, the entries which i give while offline it doesnt save that when opened online. Please fix. Overall really innovative app.	3
It motivates me to build strong habits and it's very fun as well :)	5
*Edit - 2 months on and still loving the app and using it every single day without fail! Loving the drops and how much equipment you can get. Being part of a team has made me feel less socially isolated and valued too! Can't praise this app enough! Original review: Fantastic app that makes the daunting and the dreary more achievable and - dare I say it - even enjoyable! This past week has been th…	5
I hope you don't ignore this feedback The concept of the app is great but it lacks a lot of things 1. I wanted to see my streaks in my habit and my daillies can you please add a graph of productivity and a callendar that checks whenever I've done my daily 2. Can you add dalliy or nightly feedback journal Please don't make it a premium version though I'm fine with ads	1
Amazing!	5
I really like this app, it's very fun and helpful. Love that there's no ads. Wish there was a better way to organize tasks, but I think there's mods I can use to do that, I must go find them. The search option is broken but refreshing the app works. And the reminders don't go away if you do the task. But other than minor things. Thank you so much for making this, Habitica team. 10/10 highly recom…	5
Awesome app but it closes after everything I check off my list	3
I want to love it but it crashes over and over on my pixel 6 despite reinstalling and resetting my account, and I can't use it.	1
I literally can't get past the login/sign up page. I have tried all three ways of signing up but the app does nothing. I tried deleting cache, deleting data and even uninstalled and reinstalled but it still doesn't work.	1
Great idea, however, needs work on the execution. I'd like to see more inclusive avatars because when I went to create mine I didn't feel represented. App is confusing and just needs a better system. When adding habits it wasn't easy to delete premade ones. App just needs some fine tuning	2
This app has helped me SO MUCH!! I have mental illness and chronic pain which makes it difficult for me to function at times; this app helps me keep organized and accountable. Plus it turns your chores into a game with rewards. I'm very pleased with this app. Also happy they don't show ads or try and force you to spend real money. I hope this app lasts forever!	5
So far so good. Awesome app which really forces us to complete tasks. It gets little buggy sometimes, but till the main functions are working good, I'm fine 😊.	4
I wish there was slightly better navigation, like a jump to home button that takes you back a screen that shows your stats and dailies, or I mostly wish that your dailies bar on the bottom followed you from screen to screen because it's hard to navigate back to.	4
There are certain sections of this that disallow religion, as in making a habit of prayer, reading the Bible, etc. That is just strange and I hope they change those rules.	2
Je l'utilise tout les jours	5
Really fun app, gamingfying my chores really works!	5
saved my life. perfect for neurodivergent/mentally ill people that tend to hyperfixate on mmorpgs. i feel like my life is finally going somewhere.	5
I love this app so much! Not all apps like this work, they always have rip-offs. It's really fun and it helps me with my personal goals! I also love how all the pets are designed! there has been 0 problems since I started this. Thank you for making this wonderful app, it's very helpful. Totally recommend!!!	5
If you're chronically ill, this app is bomb. It makes taking meds more fun and when you finally have energy for housework it's a lot more rewarding and makes you feel like you've been productive. That sense of accomplishment even if I just took a bath is really nice.	5
It was great app.... Though can be better..... 1. It should keep report of our habit... 2.Shows history where we got coins and points. 3.and also increasing level of grafics	4
Please add an undo button. I accidentally hit the tasks all the time which made me to avoid the mobile app all together	3
Great app, but it takes some time to load the To Do List tasks. Don't know if it's just my phone or if others have the same issue though.	4
Makes my day a bit easier scheduling this year etc	5
Could be great - Held back by a very restricted shop and saturated by premium currency items.	3
Please add a pomodoro timer with a rewarding system. Overall this app is just awesome!	5
Great app for keeping track of things I need to do and how often I do certain habits or tasks. But, my main problem is: it's not offline accessible. I can't tick off some tasks and this is a big issue I have, especially if we're going to go on vacation or just traveling to far places, and especially if the signal over where we go is very poor. Our Internet connection is also terrible as it someti…	4
I used it a lot but often switched to Loop Habit Tracker which has progress graphs and calendar (the Habitica stats are only available on desktop via a site called OldGods) but Habitica has "Dailies" which is a great to do list that refreshes every day and has a good widget. But I just ignore the game now. I think the 8-bit art style is just too small to enjoy. Everything is made of just a few pi…	4
too complicated, it gets in the way of actually doing the tasks.	2
Definitely download! Habitica makes tasks and everyday chores more manageable and increased my motivation, especially studying during lockdown. It's great whether you play games or not. It allows the player to complete the tasks and gain experience for it. The drops and rewards are plentiful even if you don't want to pay. It's more fun to play with friends and this app deserves alot more recognit…	5
Its amazing to build a game profile on your real life tasks/habits/goals , just the thing iam looking for, and iam gonna stay here for long , thankyou devs for creating this gem.	5
Could you please make widgets for each stat, I.e. intelligence/constitution so it can be used as a header file displaying single stat and start bar. Function would be to label thematic stat tracking per page to house specific apps. Thanks!	5
There is literally only one reason for me giving this app a 5 star review despite getting so recently that i haven used enough of it. When customizing your character there is a wheelchair option. I dont need a wheelchair but the fact that some people are understanding that disability representation matters does my heart so well and makes me so happy	5
In the setting you can choose the audio theme but there 's not even a single sound in the app. But this app is amazing. It's like i'm playing Neopets but for serious things. I really love the concept and I love to talk to people in the chat. They really helping me trough my hard time. I never expected that this will generally make me happy.	4
Add a setting in general or something that enables the user to set what task view they want in default either they want all task to view, due to day or Completed. Cause everytime I open the app it always set to all which is annoying cause i also see greyed daily task. I just want a permanent view everytime I open the app. And also add calendar it is what the app lacking the most.	3
The habit counter is always resetting itself, so annoying as practically I am the one who's keeping track of my habits... What do I need the app for if it can't even keep track of my habits? Also, the reminders are broken... Sometimes the app just won't send any notification to my phone, also very annoying.	2
Too convoluted	3
The one task list I've been able to use the longest and most consistently.	5
I like this app alot. Helps me organize with tasks but one issue, that's probably on samsungs end is the widgets. The daily task doesn't show but the others do. So yeah weird..	4
I'm on british english and both the B.E and A.E are the same please can you change the spelling? I mean what's the point in having a separate one when they're the same?	4
I love it. Easy to use, and fun to use as well.	5
I love this app it is the best, it really helped me do all my task and habits 💗. 💐 I am really thankful for the creator of this app.	5
Much simpler and quicker to use than DoItNow or LifeRPG, with most of the benefits. I'm not so much a fan of the online-related stuff, mostly feels like monetisation to me, but it's not too pushy. Good todo app with good RPG aspect.	5
This app Change my life situations dramatically! I actually we t from having no time management skills to getting everything done!	5
É mais divertido ainda quando se cria um grupo com amigos, motiva o dobro fazer as tarefas para coletar as recompensas das missões	5
Having to make an account to use this thing is too much of a hurdle. There are (probably better) apps which store data locally without issue. Not for me.	1
Really awesome for gamers who struggle with motivation.	5
This is good when you are able to self motivate to use it but not enough for you to do it all your self	5
This genuinely makes me better at getting things done, motivating me to do things that are good for myself. I only wish there was the option to sell pets and mounts!	4
This app changed my month! Hopefully, will changed my year! I subbed for year 🔥 I tried using habitica seriously. Searched for youtube vids for guides and inspiration. I've been so productive. I became mindfull of my actions. The experience will difer from how you play/use this app. Tip: start with small things. Make a mini version of a goal you want to do. Eg. Instead of "jogging for 30mins" you…	5
Good app all round. A few minor issues the notifications and alarms are silent even when my phone is on loud and volume max. The to do tasks could be helpful if they are due that they are put on daily tab. Some organisation with habits daily and to does. Other than that great app really useful good that you can many task, habits and dailies. The adventure with your little character looks promisin…	4
Brilliant design	5
Best app to keep track of whatever you want in the world. Equip yourself with honesty and transform your life into a MMORPG	5
I enjoy this app it's super neat. However I want my lists organized so I can do the tasks one by one in the order I want. But the lists keep moving my tasks all over the place, when I try to move one up or down I have no idea where it will land. That's a touch frustrating.	3
My friends and I have a habit of procrastinating and playing video games. So Habitica is perfect, since we're playing a video game, leveling up, and keeping each other accountable. Thank you Habitica team! :3	5
I really like this app, I would like to be able to set tasks on a timer, resetting the time once completed. Example I don't need to mow every Monday, but I need to mow every 10 days.	4
Juvenile	1
BEST!	5
This app has a lit of promise, but for me it isnt quite there yet. I need a function for days when Im out of town and the usual chores do not apply. Options like "every other day" woukd be helpful too. I didnt really feel any incentive to level up a tiny pixelated character I could barely see. I also felt like this apo led to me spending too much time on my phone, which is counterproductive. Mayb…	3
Habitica is great for me to get that little extra dopamine rush when I complete a task. I wish that the to do section maybe had with a visual separation between the days that tasks are due? This would help a lot. Thanks Habitica!	4
So I don't know how to start this off so I'm just gonna get on with it. This app is amazing! I've had this app before and I can tell you that out of all the other task list apps out there, this by far my favorite. It's fun, it's helpful, it's updated quite often, its got the social aspect. And tons of other helpful resources. Disclaimers: This review and my opinion of the app is not a result of B…	5
I'm not in the habit of leaving reviews but as a neurodivergent person I wanted to leave this for others to see. This app is organized in a way that gameifies taking care of myself, mor home, and my family. It doesn't shame you if you forget to log in or don't finish your tasks. It's just very helpful to me and wanted others to have that info.	5
Thank you for creating this app! Please add a Pomodoro timer+ tracker as well.	5
Not able to register	1
Best to do list out there, especially for ADHD people. Though the websit view is better, i recommend organising through the web.	5
I really like the app and I've gotten used to it. I think there is a very large room to grow for this app. It has a good desktop support since it can be opened on a desktop browser but a smartwatch app with Wear OS/Huawei store support would be amazing. It would also be amazing if it could sync with google clock and calender. It would be really nice to be able to export my to-do list and dailies …	4
the player character is ugly. there should be more free customization of the face and hair. the mechanism of rearranging tasks, habits, etc. doesn't work half of the time.	4
Best!	5
Quite glitchy, and the sounds are tied to notifications instead of media volume.	3
reminders are awfully unreliable	4
Wonderful app! It has helped me get on track with my personal goals. In such a fun way too! Suggestion from a really hooked new fan of this app... My work has me scheduled two different shifts throughout the week (morning or night), it would be cool if we could save the lists under categories so we can switch our goals easier as the days go. Since I switch shifts so often, it makes it harder to s…	5
This app is useful with a good idea, the bad thing is that internet connection is required and ticking the checkmarks isn't possible in offline mode even as a temporary option to save our progress in jobs and habits when we are not connected to internet	3
This is my first time writing a review in general. I love the concept of this app. I like that this app is free and doesn't ask me to go premium just get what I really need/want in a habit helping app. I like that I add a habit and it includes notes, so I remember why I added that habit and the main goal/purpose. However I would like to see an upgrade to separate the habits. For example morning, …	5
This app really helps you incentivize doing all the things you want to do with your life but struggle to find the will to do.	5
Nice.	5
This app is wonderful since it allows me to keep track of my activities without any hassle. Although I do have a small suggestion, and that is being able to attach images. <333	5
I can't even sign in. Loading forever.	1
Changed my life, if you be honest, it will change your's too	5
Turns your tasks into an rpg, if what your life is missing is a bit of extra reward for completing tasks I can definitely recommend this app.	5
Thank you so much because of this app I'm more motivated to excel in school and do my school works on time! And I also do a lot of house chores now compared before.	5
I really love this app! I found it while looking for something to help me with my New Year's resolutions, and I've been addicted ever since. The idea of gamifying life is absolutely brilliant, and it works! It makes even getting chores done so much more fun, especially when you're questing with new-found friends, to fight bad habits-bosses and maybe win a special pet or mount! I decided to subscr…	5
I usually don't write reviews.... So if I write one that means I love that app..... This is the BEST APP EVER! Period. Nice work HabitRPG, inc. Keep it up!	5
This app helped me to organise my life alot ( I gave it 5 stars before) But it doesnt work in my region so im forced to use VPN to access my habits First it was all right for me but in later time it started to be annoying And the notifcations and reminders dont show up! 🙄	1
Although there are still small bugs, it makes finding a schedule and completing mundane tasks fun.	5
Very good concept easy to use	5
The daily reminder doesnt work unless you open it, which defeats the purpose. It straight up doesnt work without an internet connection. If its not consistent, its worthless.	2
Loading is bad sometimes stock on the same thing after leaving a challengeeven if you leave and click the delete task too it won't go off	3
Gamified rpg gamjng pog	5
An amazing app that helps with habits and adds gaming to it for fun. First let me say there are no ads, which I love. This app has helped me so much in just being more organized and I have actually been making To-Do lists on this app everyday, which I use to never do. I love the gaming aspect to it and how you can dress your character and the amount of things you can do in the app. Such as, Chall…	5
This is absolutely the perfect thing to track all your life goals, and you can write your thoughts down & explain or express to yourself on how to want to go about the future of your life. I always thought about my life as an RPG game, so this is like the interface menu or quest book, while you continue your adventure of real life. This is super motivational & I think I'll be using this for a lon…	5
Great in almost every way, but please for the love of God make an undo button for the to-do list. I've lost so many to-do lists and notes because I went to check the details of a task and accidentally checked off an incomplete task.	4
Just fell in love with the concept of the app..It's like they gamified the plain simple habits app.Makes it more easier to use!(the graphics of the character could be more improved too+there should an option once an activity in dailies/weekly gets completed it could vanish) it'll be less chaotic&more organized and reappear once again in dailies the next day	5
Can't custom sort my dailys anymore, they just pop back to where they were after I drag one or they move to a random spot.	3
Works really nicely. I'm glad I've started using this app - now I can procrastinate by doing somewhat important things instead of using YouTube. Jokes aside, I really appreciate the ease and developer-friendly nature of this open-source application.	5
Not worked for me.	1
Too complicated for me. :)	3
Really great. I like having reminders to get stuff done.	4
It's cute, easy to use, and is great for helping you keep track of everything. If you have the creativity for it, you can turn even the most mundane of tasks into an epic quest. It also lets you choose the difficulty level of each task, which I greatly appreciate. You get rewards and experience for completing things and your hero is customizable as well. Essentially you can turn your life into an…	5
2 moderators attacked me in Tavern Chat for "generalizing" after saying "Happy International Women's Day, what I appreciate most is women are nurturing and seem to take care of those around them, first" They went on to say "Some women do take care of themselves first" and stated that arguing with their ruling that I was "offensive" was against the Community Guidelines. I would stay if I didn't ca…	1
i kinda rated this 4 stars & 6 percent but since I can't do that i guess 5 is fine.. :'D this is really helpful since i really love RPG like games! i really hope it added more features to make it more exciting & RPG-like!	5
Still loving it! Wish it would still works when offline.	5
I've never tracked habits consistently for this long before. I live with a serious mental illness and Habitica helps keep me on track many days. I don't use the quests feature, just tasks and pets, and that's enough for me.	5
Great app! Can you add a feature where you can see a summary of the habits you did in a calendar format?	4
The Game Of Life...Where Everything You Do Is Fun!	5
The links for the challenges do not work. The links get displayed but clicking on them does nothing.	1
BANNING is alright, but why ban a person from all the features. That is quite counter productive and somehow conflicts to the purpose of the app. It is understandable to ban a person from chatting because it stops the offense from prolonging and also teaching a lesson, but banning an account from using the productive features is kinda nonsensical. In this kind of issue, uninstalling might be a fa…	1
It's an amazing app. I uninstalled all other productivity todo apps because of this. The only thing it lacks is a pomodoro tracker and calender . Add that and I will uninstall tick tick as well. Then this will be my only app for productivity.	4
really good app and very helpful for my motivation problems :)) would definitely recommend this too people with adhd/motivation struggles the reward system and whole kind of game theme is so helpful	5
The most fun I've had completely tasks ever. Everything about this app is awesome for helping me stay on track and work through my ADHD. There's a good amount of free and paid options making it fun for everyone. This is my favorite app I have!	5
Love, love, love!	5
Love this app! Reliable! Hasn't failed me! Helpful to remember things! However if it is out of sight it is out of mind for the most part! Is it possible to have a widget that displays what current tasks needs to be done so I can just have it on my screen?	5
The core task management part of the app has all of the bells and whistles that you would expect, but it feels like it somewhat lacks polish and everything feels a bit rigid. It was never made clear how to access the gamified content that Habitica has, such as fights, which made me lose interest quite quickly. Overall, this app just doesn't do it for me unfortunately.	3
Party quests are not displaying correctly	4
I have audio issue, the BGM is not playing.	3
Best!	5
Thank you. I was able to do tasks I was piling up from days. Please keep working on this great thing.	5
Cannot get back in after setting up my account- won't accept the password I set- won't recognize my user name. I tried to reinstall but no joy. I tried resetting password but no... I am uninstalling it again - quite disappointing	1
I cant leave a challenge why is that?	3
Best app I've had :D	5
I just wanna say this app really help me change for the better. Thank you	5
This app changed the game for me - by turning the world into a game Thank you Absolutely brilliant	5
I have to spend an extra five minutes just trying to get items in a list stay where I put them. For example, I drag "Take out the trash" to beneath "Take out the recycle", and it instantly reverts 99% of the time (not exaggerating). Otherwise seems neat, too early to see if it's effective for me (not yet one day in).	3
A great overall app I love the idea soo much and the cross platform features are so cool The app lag some times to update things I hope you can fix this in the future Anyways outstanding job guys and keep it up	5
Changed my life for the better. Occasionally buggy but nothing too inconvenient	4
I like what this app WANTS to achieve. but there are a few fatal flaws. every time I log in, I LOSE health. and sometimes other things. I love the format, but it needs better instructions.	2
Wow! Just absolutely wow! This is amazing. I've been looking for an android habit forming and task tracking app forever! This is it. And not only does it work well, it's GAMIFIED! WHAT???!!!! You heard me. It literally turns your life and chores and tasks into a game. 10/10 best app of the year. MVA (Most Valuable App) Highly HIGHLY recommended. I can't say enough about how awesome this is. Excit…	5
It's awesome, I use it to do everything and it feels so rewarding. It's amazing for nerodivergents and nerotypicals alike, everyone needs this app! :)	5
I love this app. It really has motivated me to be more productive every day. I'll check it and think, "Man if I just had a few more coins, I could buy this." And then off I go to do a load of laundry or work out. My only real issue with the app is the syncing issues. Those ARE annoying, but the team seems responsive so I expect they'll be fixed soon. I also hope they add more normal pets! Would l…	5
Best app for productivity for me	5
If you love RPGs and/or collecting, you'll probably like Habitica even if it doesn't offer real-world incentives. I even got a subscription so I could get more pets and gear. I've gained around 10k gold and have actually enjoyed putting work into the app itself. But lately I've inexplicably started losing health at a higher rate despite having fewer incomplete tasks and just lost ALL the gold. It…	4
Brilliant app for helping you to make and keep new habits.	5
The best habit tracker I've ever used- and I've tried almost all the gamifiied versions. This is an all in one, and is FREE to use. There are no ads, no paywall to deal with, and there's a ton of incredible widgets and browser extensions to use as well. There's a reason why this rpg still leads the pack. The only time you would pay is if you'd want to support the team and unlock some extra (non-c…	5
Been looking for a fun task app similar to epic loot for ios during the iphone gen2. Thanks for this	5
Best app ever 10/10 although I wished their was an option to reset your level to 0 and keep all your stuff or maybe a full reset. In previous games I loose interest after reaching lvl 100 but maybe that's just me	5
Buggy application, really irritating !!! Guys, please complete it by proper testing, your testers needs to be fired !	1
Doesn't even deserve one star! If you live in Iran and can't use this... It's bcuz they banned you now go delete it.	1
This is such a great way to get stuff done and have better habits. I love that you can pause dailies as needed as I have a couple disabilities that make it so sometimes I can't do my dailies. It's a lot of fun too. Only complaint is it's not very intuitive. There's features I just don't get and not sure where to look for explanations.	5
I much prefer other organizational/self-care apps to this one. Using negative punishment in tandem with positive reinforcement is a major turnoff, and it feels like I gain no real reward. I deal with that enough in my day-to-day. I also know that I will *almost always* end up skipping taks, and no in-game consequence will help me with that. I want to be rewarded for the stuff I *do* get done, not…	2
The app is good enough and kinda unique because of the gamification system. Although I found it a little confusing to use, not a big deal though, I just had to see two YouTube videos and read a beginner's guide (sarcasm intended). My complaint with it is that it works only online — if I were to make a task while being offline and I connect to internet later, all of those tasks get deleted. This i…	3
Really needed a to-do app that not only motivated me to do every day tasks but also one that holds me accountable when I procrastinate and or do not do something. Although I'm not terribly interested in earning rewards, achievements, buying things, I can see how younger users would enjoy it. I also like that I can set due dates, reminders, and schedule tasks every day, every other day, once a wee…	5
It's my second day & I'm having a lots of fun.🤩	5
Love this. Helps motivate to stick to good habits and stay on task.	5
This app defeats many very popular task management app easily. Almost every task manager **deliberately** ignore supporting Markdown or support only 3/4 particular syntax. Some of them even lock important functions such as **Reminder** behind subscription. And the gamification feature makes this app only better. It would be nice to have a journal too. That would give us a complete option.	5
This is a really great app! Now it feels like I'm living in an rpg game. You also can't help but do your tasks just to earn gold and exp. Thanks for making this great app!	5
I have ASD and ADHD and this helps me great deal to establish and maintain routines in a fun way!	5
This is so great! Exactly the motivation I needed! Love it!	5
Please add an offline feature	4
You should add a offline mode , many times internet isnt available and habitica dosen't work.	4
I've replaced all of my daily checklists with this app. Gamifying my to-do's & daily chores this way motivates me to get those things done a lot sooner, especially if I'm grinding for food drops or trying to level up. Highly recommend if you're looking for an app to track both your habitual to-do's & one-time to-do's 💯	5
Absolutely 5 star , great app 💪. SO many very useful features, must check this out.	5
Some aspects are irritating. For example I wish we could switch the side our pet was on so it's not always covering the mounts face 🤯. But overall a great and fun app.	4
I have ADHD and depression and this app is SO full of motivation and encouragement. It's simple to use and pretty intuitive for new users. I'm actually excited to do chores for the first time in my life. Thank you so much for this app.	5
Doesn't save offline changes. Everything you did offline will not get reflected later when you're back online.	3
First of a kind Application! Awesome 👍🏻 loved it!	5
we need charts to review the progress	4
Excellent app for tweens up as well as adults. Daily motivation, forming habits that you select, game like rewards, plus many social options (I joined discussion "guolds" for parents, runners, and writers). Having used it for 6 months now, it's still helpful and engaging.	5
I actually want to do stuff. I'm not useless	5
Beautifully designed. Honestly I've been dreaming of an app that tracks and rewards my personal progress and this one feels like my dream come true. Big kudos to the developers!!	5
I have consistently done all my tasks for 85 days in a row now. Turns out, the fear of losing my virtual gold and the items I gained is ALL the motivation I need. Thank you so much. You turned my life around. I will for sure buy gems to at least give back in some way. This app has been a tremendous help for my motivation and memory. I cannot thank you enough. EDIT: 190 days now. Thank you soo muc…	5
My journey started	5
It's great, but until they implement weekly and monthly tasks, it's not really suitable as a complete solution.	3
I can't register. Please help me	2
Can you please improve graphics of character a little bit .	5
It helps me do things that I want to do by rewarding my character. Always loved RPGs and this is just perfect for me. All my friends play with me and we party up to take on mobs. My friend Jesse has a flying pig mount he named pigasus. This game is dope	5
I use habitica on my phone and my laptop, and I find the app version a bit easier. I use it as a to do list as well as a habit reinforcer. You can get the most out of habitica if you join a party with your friends and do quests together, but before I did that, it was still a good motivator.	5
Amazing app! It has really helped me to focus on what needs to get done in my life. A couple of suggestions on how this could be even better: 1st add a calendar function so we can look back and see when we completed a task (especially if it is repetitive task like doing laundry or washing dishes etc. to track our progress) and 2nd it would be great if it could sync with other calendars like googl…	4
Makes me want to go and do chores.	5
The biggest thing habitica does right is multiplayer/community. The party and guild system and the users and community around them is just something I can't find in other apps. I think there are areas of improvement (like getting a calander system) but It does give an MMORPG Feel to the game.	5
It's fun but it really sucks that I work my tail off to get all my goals for the day and some todo's and everyday it takes away all of my coins and drips me levels. I'm not buying coins and gems if everyday you are just going to take them all away. That really needs to be fixed. It's actually discouraging and makes me want to stop trying to form new habits because what's the freaking point!	2
Thank you so much for creating this, this is what I was unconsciously looking for, I even created something like this in the notebook, but as you can guess, it is very inefficient. The application is great, but it is not very smooth, but that's not important. Anyway, thank you for creating such a good app	5
I really really want to like this app, it's absolutely brilliant. But the fact that I'm not getting reminders for my dailies is really a bummer.	1
love it, u can chat with other people around the world in tavern, u got to choose your class (mage, healer, rouge, warrior), mine is mage and u can organize your task checklist, 1000 stars! ⚡	5
Приложение, которое действительно помогло следить за привычками и их вырабатывать	5
Most helpful thing i found on playstore. Thank you for not adding ads in your app.	5
I've used this app for years off and on. I stay because I like my party and I want to unlock all the pets and mounts in every color. It's not a strong motivator for me, but it keeps me on the app. My main complaint is the lack of organization. The to-do's are hard to organize. I think there should be sections. Notifications often don't work, and I don't like the habits section. I use this app in …	4
Please, please, please add an option to see my streak in calendar view.	4
Please add an option to make multiple lists.	3
Best app for habitc tracking, brought along with a fun gaming experience. Don't forget to join guilds or go to the tavern to socialize with others, might as well help you on your goals.	5
Since I started using this app, I have managed not to miss a single day of some very important tasks - a first for me in my life. The gamified habit building meshes well with how my brain works. Where it loses a star is its CRON system. Instead of keeping stat boosts from your party for 24 hours, they are reset to 0 the moment you open the app after local midnight. This promotes procrastination (…	4
Absolutely loved this app while using! Made me feel good about myself for completing my goals but I have to uninstall as (this is a personal issue, not the game's) I feel bad for no longer completing my goals. My character has been in the tavern for a while waiting for me to become motivated again but it just hasn't happened. I have taken a screenshot of the app so I can find it again when I am r…	5
Doesn't even accept the password while registering	1
I have the pro version so I can't really speak to how the ads are but I really like this app. The game elements really encourage you to stay motivated.	5
Whoever thought of this deserves a medal, thank you for providing a fun way for my fiance and I to keep our habits in check, also for helping me find a way to get her to play a video game with me 😂	5
I LOVE the idea of this, but it doesn't seem to be well done. The only thing you can set up are daily tasks in a list form. There is no sort of calendar overview (No weekly or monthly view to get any idea of what my schedule should look like). I do hope they develop this into something amazing.	2
Best positive good features app. Goal habits focus.	5
I wanted to stop using it, as I used to do it with a friend, but Habitica is so good I can't even find a decent replacement.	5
Best to-do list app i have found.	5
This actually works really well for me :)	5
I Love this app! Gets intense sometimes but I enjoy it and it's useful.	4
I would really love for the weekly tasks to be able to check them of earlier in the week if thwir already done by that point and that status to be remembered until the day it is "due". I.e I am a student and have homework I get weekly and it needs to get done by Monday, some other needs to get done by Tuesday. And I sometimes finish the homeqork ahead of time but on the day it is due my Checkmark…	3
I AM IN LOVE	5
I suffer from various mental illnesses and this app is really helping me take care of myself and improve my life.	5
Excellent habit and task tracking app. The gamification really helps make you want to achieve the goals you've set. Also I LOVE that there are no ads! I'm a new user in the past week but I am really loving this app.	5
Great concept, well developed, but it's hard to use and that makes it terrible to follow through with your daily tasks.	4
I have been using it for a week and it's awesome ..but.. I'm generally out of internet and that's where the problem come, it doesn't work without internet	5
Personally I loved Habitica and recommend it to all my friends. This app helped me tremendously in my exams. About this app: It lets you add daily tasks, to-dos, habits, and on completion of each task you're rewarded with pets, pet food, coins, etc. As a student you can manage your assignments and syllabus, or even a daily habit you'd like to cultivate. It's different from other productivity apps…	5
The app is great but the volume of the audio themes is too much, it would be greatly helpful if there was an option to adjust the audio theme volume in the app. Its too loud even when my media volume is on the lowest possible setting other than zero.	4
This is hands down the most polished and feature rich habit tracker on the market. What's more, the habit tracking is 100% free! There is an incredibly engaging and fun RPG attached to it, and this is where they make their money from cool cosmetics for a very reasonable price. I'm so happy I found this app.	5
Absolutely great app! One thing that keeps it from being perfect is that, it would be better if you can add pictures in your to do list or dailies. It would also be great whenever you missed the deadline in the to do list, you'll lose a health or damage a point.	4
Very helpful way to get me to complete my tasks! It is also super fun with joining a party and having eachother to help you out :)	5
This is Awesome!	5
Absolutely love it. I have adhd, it was becoming impossible to organize my day. With help of my psychologist i tried everything possible. This was the only thing that helped. Its free, it has alarms and notifications. Its the best app in play store. Also, you can use it both as a game and/or comunity. The sky is the limit. Keep up the great work. Hope you never change	5
Love the concept and the execution is wonderful. I'm a rewards-oriented person so this really keeps me motivated to do my tasks. One thing I'd like is to have a timetable/calendar view of habits and dailies, to have a review as to when the user missed the most tasks. I also second a previous review's recommendation of a notes option, as it could really boost the productivity.	4
The widget and task sorting option is not good. Either way, it is a great concept	3
This is super fun except character customization at the beginning	4
It's a pretty good app. But can you guys update the home screen widget UI? I like the anydo widget UI, but i want to use Habitica.	4
Love this app. I think it is very useful and fun. Combining real-life, every day and long term tasks and goals with an RPG character leveling system of sorts. With a Habits, Dailies, and To Do tabs... I think if you are unmotivated this app could potentially help you also helpful for organization. I don't feel the "pay to play" that anyone is talking about. I don't think that is the main point of…	5
Really looking forward to leveling up my avatar and unlocking new items. Really helps accountability.	5
Doesn't seem to work anymore, like at all: I haven't lost any health in an entire year for failing to check in (I am NOT using the "tavern" to pause tasks), and it seems that it fails to even remain running in the background. I have to manually start the app to interact at all, and that defeats the entire purpose of it for me. I absolutely rely on the notification reminders, which stoped working …	1
Habitica is a good app with a lot of enjoyable features that make it worthwhile, but it also has a lot of bugs and glitches which cause overall functionality to suffer. Also, sometimes customer service is unresponsive. I never know when or if they will get back to me. Some sort of help ticket system would be useful.	4
Such a good app as it makes my chores and work fun. I have used this app for about 7 months and I have loved it ever since.	5
bagus untuk habits, jadwal harian dan to do list jadi lebih produktif	5
Yesss goooddd app for life	5
This is an incredible app and I recommend it to anyone who has a compatitive streak and/or loves rpg games! It helps me a ton and it got me and my partner closer. 💯 recommend!	5
I love this app so much	5
I always quit doing my tasks but I always re-install	4
Excellent incorporation of a to do list into a game!	5
I've been having a hard time just getting things done, but this app makes it way easier to find motivation. Honestly got me through finals week 😂	5
Life changing app, thank you very much for the amazing work.	5
Used for couple of days. Seems nice but very connected to the world outside. Doing your own things and bosses seems limited. Bit tough to start	3
It's good app to control your task. I'm feeling like playing a game IRL. But sometimes notification not pop up, it's should be fix. Overall I like this app so much	4
App itself is good. But I don't see option for reviewing my progress report of the habits. There is no calendar view, nor there is option for exporting the statistics or progress report. These are important for habit formation.	2
I've had it for about two weeks now and it's really helped me stay on top of everything	5
Very supportive effects	5
Useless	1
The final star is just for timing task. It would be so awesome if you make a new type of tasks where there is a timer and for every minute, coins are added to the wallet.	4
A fun twist on your list of chores.	4
It's good but I am having a checkmark problem, every time I press the checklist box it won't do anything.	4
Really cool lots of options wish there was a goal tab tho	4
This apps cool.	4
Need better timer options. Would like to set a time of how long something needs to be done. Also, reminders on the tasks need to have a comment/note section to describe the reminder.	3
Item and character doesn't appear.	2
This app is just what the doctor ordered. I believe if people use it properly, they can make their life more productive and joyful. Thank you and good luck!	5
All right, all great but maybe add something like notebook sounds good. Think about it, because it would be good idea. All included except for notes... Oh & more - please add more informative greeting.	5
I instantly fell in love with the app! Great one! I invited my brother and two other friends to team up and level up 😄 To a healthier life! 😁😁😁	5
I love this app, I've used it everyday for about 4 years now. It's amazing and I cannot emphasize just how awesome this app is.	5
I love this app so much!! it helps me remember what I have to do and actually do them. the rewards when I do good give me a much needed dopamine boost, great for hacking my ADHD since we THRIVE on dopamine. I've also started building good habits with it! and the social and game aspects are a really great part of it. highly recommend to anyone struggling with ADHD or mental health :]	5
I love the app. Have been using it for a few days and was able to be 100% more productive. I recommend it to my friends...especially those with ADHD.	5
Privacy nightmare.	1
I love this! Defeating Quest Monsters with my Party helps me look forward to checking things off my list. What I used to gripe about, I now do with less resistance, because this app helps me view life as a game. The themed chat groups are super supportive. There's a community to suit any style, and a variety of challenges to take part in on top of what you set for yourself. You can select the due…	5
Decent app, a lot of it is pay to play but I don't really care about the quests and guilds. The app is still a great way to manage my executive dysfunction and get me to track daily habits I forget or don't have motivation to do. Originally left a 3 star critical review for being una me to log into my old account on a new phone because I didn't know how else to contact the developer and got a res…	4
Great app for anyone seeking to build habits/track to dos! I needed an app to contain all my dailies and one time to do's. All apps I used made me do a lot of changes in the settings to do the reminders, formatting, tags, etc. This app does all the organizing for you! They already have a tab for dailies, one time to do tasks and habits you want to stop/continue 🤩 flexibility but no frills. So eas…	5
I want to like it. This app on the surface is pretty nice, the functionality is solid and it's made well... but then you hit the pay wall. Most of the game is locked behind Gems to buy items and quests in games; I don't even have a problem with the items behind the pay wall, but the quests, and other things, that's a step too far. Theoretically you can earn gems, but you've got to do challenges, …	3
This app was GREAT! Until it stopped recognizing time. Dailies do not reset like they should reliably and there is ZERO ways to force the app to recognize it forgot to reset the day. Do not use this app if you are looking to improve you life, at least not until they can ensure the app recognizes something as simple as a DAY CHANGE.	1
So, this app is absolutely awesome. I just love it, and it's really given me the motivation to get myself organised and hold myself accountable. I just wish it had an offline mode so we could sync our stats when online, and also a progress chart, so we can easily see how we've been progressing. I love this app and this is the ONLY app I'm seriously considering money on.	5
It's a decent task manager! The biggest downside is that I find the graphics - specifically the characters - very unappealing. So there's little to no incentive for me to buy anything for my character. And an issue I keep facing is that some things can't be done via the mobile app and I'm told to visit the homepage. And truthfully, the homepage works a whole lot better and seems to have gotten th…	3
Классное приложение по внедрению привычек	5
Not bad useful tool.	4
This app works miracles especially for folks with executive dysfunction.	5
While decent to keep motivated, you can't really make amy progress with items as you can't select or change your class! It says you can in tbe settings but no matter how many times I check or reload, nothing is there or under any option there.	3
Did like this at one point but for whatever reason I seemed to prefer just doing a normal checklist these days.	3
Amazing app especially for adhd-ers like me. Highly recommend to everyone!	5
Habitica allows for a system of habbits that have really changed my productivity game (pun intended). Fun, user friendly and flexible enough for pretty much everything you can think of. Highly recommend everyone try it out!	5
Hands down, Habitica is the best habit app I've ever tried. It makes doing mundane tasks exciting. I love the monthly events, and the community plus the party system. Sure there are things that can be improved. I wish we could keep the history of our checked to do lists. And I also wish there is a search feature in the equipment section. But overall, the good definitely far outweighs the bad, and…	5
love it...but i do want to add someting 1) Customize the widgets 2) Add different stances with the pets and mounts especially when entering the tavern (like sleeping) yep thats all...again this app is superb really helps diligently do my good habits and throw out the bad habits.. i mean thats the main reason i download this app and i think others felt the same way	5
Just installed the app... And I'm already seeing result... Generally I'm the very lazy type of dude, I hardly get things done. I hate doing the normal everyday boring repetitive but yet NECESSARY task.... And as a gamer, the sheer fact this app gamify those task... Just made the entire process a lot less boring for my lazy a$$............. And honestly... HabitRPG Inc.... You guys ROCK!. I defini…	5
Very confusing interface...would highly suggest doing the computer version before trying the condensed app. Way more clear if you have tried things like trello.	3
Ok Im just downloading the app. I will re-review after 2 weeks, hopefully I find this app helpful.	5
Good app.	5
I really love this app, but since yesterday the website isn't working, could you fix this please 🥺	5
This is the ideal app for people like me. Very unique concept of reward and punishment to get us to do stuff. I'll buy a subscription to support the developers once I use it for a few more months. Just one suggestion, it's costlier to pay the same value in Rupees than in Dollars. So can you adjust that?	5
great app! personally i use it as a checklist of bodily needs for my executive dysfunction. i'd like someplace in the app to take notes. for example, which foods for what pets or the maximum amounts i can boost each stat using equipment i have. if you have a habit to do something fun, you can write down what it was. looking back on previous entries might help you see what new tasks need to be mad…	5
very fun	5
It is a great conceot, but when the dailies don't refresh every day, it kinda ruin the game Edit: I have tried the developer suggestion, but the issue still occurs, so sadly I will uninstall this	2
I have a problem with the stats widgets, it used to work but no longer. It displays no hp mana or xp. I only see the Habitica purple icon.	4
Love this app!! Definitely recommend it for anyone! I'd love if you added an optional delay for the beginning of the day - I tend to do a lot of things in the evening which may be after midnight...	5
Good motivator, gameplay is not straight forward or beginner friendly. I appreciate the dailies and to do lists and the stats give a good indication of how you are doing. Could not figure out how to get a quest going, or do any type of freeplay. Just enough to level up my character.	3
I really liked this app in the beginning but I don't want to group up with people for quests. It was a great app for keeping track of goals, tasks and long term goals but it was super discouraging to keep getting demoted and losing currency. I wish there was a version that would let me freeze xp so that I can use the app without having to group with other people	2
Played five years	5
Great app , love the concept, the fact that it's free makes it even better, however I think the design could be improved,and I would like if habit widgets somehow indicated that the task was completed , it would give a sense of accomplishment to the user , right now widgets are very bad and uncomfortable to use	3
The best application!	5
Great app! Helps me keep focused. :))	5
You can't register	1
Two weeks consecutively I'm experiencing crashing everytime I try to open the app, I'm now using on the browser. Never had a problem like this before hope you guys fix it.	5
I didn't use it much so can't tell if it works but I'm trying to delete my account and it's asking me for my password that I don't remember and I don't even get an option for password recovery after putting a wrong password. So annoying!	2
I have it on PC and ios and android but for some reason it's in Spanish. on desktop I switched it to 'spanish' and all the text was English. I can't find this option on mobile	5
Can't register waste of time	1
it is fun. every time i get an egg/food/potion though, i have to drag down the spinning wheel to let it reload 😒 Edit: thanks for fixing that issue!!!	5
i have downloaded this app. I'll start using it tomorrow.	5
Best app ever to build habits!	5
I like the concept, but so far it's very buggy. I assume the habits weren't working for me, since nothing happened when I hit the + or - buttons. I deinstalled the app and reinstalled it to see if that fixed it, but now I can't login, as the login screen doesn't do anything. I also couldn't register with google at all.	1
Fun, especially for gamers	5
I am more productive than ever, since I've started using Habitica. This app is the real thing	5
Cool but too much gamification and trying too hard to be all in one (habits, tasks, etc) without ability to set the goals and types of habits as easily as I'd like. Could be great, bit decided to try other options	4
Use it every day, so helpful	5
Love this app 100% but wishing more insightful record for each of my habit	4
Amazing tracker- I only wish I could sort alphabetically my daily tasks or that there was a calendar view. Otherwise this app makes it a lot easier to keep up with habits, to do lists, set goals - it's been saving me and helping me function since I entered a deep depressive state.	4
This is awesome. It helps me complete daily tasks and it makes me keep myself accountable. I just wish it had a feature to track your progress of task completion. That would make it perfect.	4
This is just a great app; very friendly and helpful community as well. Not to mention free. Habitica really represents the best of what's possible in the entire category of phone apps.	5
the app itself is amazing and helpful. but I would really like to see a tab for others to see our scores and our daily habits.	4
If you struggle with tasks or starting/breaking habits, seriously get this app! It'll change your life! I thought to myself "no way am I falling for this gimmick" but here I am, being productive as hell everyday and actually keeping up with healthy habits I've wanted to do for months now. I have adult ADHD so it keeps my attention, I barely have to set a reminder to check my lists throughout the …	5
I would really like to be able to have a task that repeats every week and is due by the end of the week. For example vacuuming or dusting. Sadly it's kind of a deal breaker for me	3
Its a really good app! But it does sometimes kick me out. But honestly its just probably my phone but the whole app i live it makes me more active 🙃 Ty guys for helping me do what I need to get done in a fun way(:	4
Great concept, very helpful, very fun.	5
Best habit tracker app for people like me who are gamers ☠️	5
Well done everyone! Even while buggy there is constant improvement!	5
This is more a question, do I have to pay money to play the game? Will it charge me even if I don't buy anything? Do I have to have a subscription to play?	3
Unforgiving. No free found health potions. Your health never increases, so there's arguably no reason to level up. If you want to change your habits, find an app that won't kill you metaphorically.	2
This is the only to-do list I have ever managed to use consistently for any length of time. This app supports my ADHD brain in keeping track of the things I need to do in ways that don't frustrate and overwhelm me.	5
I've used this app for three months now and it is fantastic! It helps my ADHD tremendously and I've recommended it to all of my friends. Big love to the devs <3 There are two things i noticed that would make it even better: being able to copy messages that were sent and deleting the leaf update in the notification tab, since I can only get rid of it by clicking on the link and opening the browser	5
I even tried using your website but i couldnt register. "Your client doesnt have permission to get url/login from this server" this was the messege and it was sad to see.good luck.	1
Absolutely useful way to gamefy daily tasks and long term goals. I love the social aspect to keep me accountable, and I love that the only things you get from spending $ are purely aesthetic. It's been an great tool to help keep me focused and diligent. I don't think there has been any other app I have talked about/recommended to more people than this one.	5
Love the idea of this app. I just downloaded it and i have been loving it. I am surprised i never knew about this app until now...when play store recommed it to me...Awesome app to get your life together...one of my favourite apps ever and i have used many apps and games. thx devs.	5
Daily tasks/loosing health if they aren't completed makes me a little bit anxious, but that's the point.	4
Excited to see some results.	5
This app is a marvellous and intelligent creation, I am amazed at the intuitive design (from an RPG players perspective at the very least), I am excited to further refine it for myself as I continue using it. But most of all, as I write this review, I am truly grateful to the creators of this app, this is working for me, it has already instigated very positive changes to my life, and I've barely …	5
This is a great app, I've recently started using it and it's really fun. I have an issue though, I accidentally touched a task in my To Do list and now it shows as completed even though I actually haven't completed it. Is there a way to undo that? Please help...thank you :)	4
I can't register or log in with Google, it jus doesn't do anything for me. Tried several times, nothing	2
OH MY GOODNEES THIS GAME IS SO GOOD, INSTALL THIS NOW. It's a really fun way to to chores that were never fun. And if you ever need help you can look for it in the tavern, a public place to talk to other people for help and advice. And the tavern is totally kid friendly. Do I really need to say more?	5
Its great, it has really helped me a lot. But i cant seem to sign in with my favebook account? It says i need to switch to a registered test user. How do i solve this? Really dont eant to lose all my progress	4
This app is one of a kind. Great features like habbit, dailies, to do, and reward/penalty system. Great interface to connect real life with virtual reward/punishment system and track them digitally. It is, in one word, fantastic. I would recommend anyone who want to stay in track in their daily life.	4
One of greatest apps i've ever found	5
I downloaded this app because I needed to get things done, and was hoping this might help that. It has helped me majorly with remembering to do some exercise, get homework done, and brush my teeth. Strongly recommend if you have low motivation or struggles with deadlines.	5
Great way to help keep up with habits and to-do lists!	5
It seems cool I guess but it kept asking me to mark off what I did before going to bed yesterday, and gives me all my dailies unchecked? Even if I already used the app today and checked a bunch off just hours ago.. so it's not remembering anything I check off, and penalizing me for opening the app, as it keeps thinking it's a new day and I did nothing? .. so I just don't open it anymore. Wish it …	2
If you have ADHD this app can quite literally change your life. No joke. Don't hesitate just get it	5
this is awesome! i really enjoyed doing my tasks because of this. also the gamify part is really cool, especially the items and the pets. though, there are times when it becomes a little laggy, especially when ticking off tasks. also, i was thrilled to see a homescreen widget exists but it doesn't work quite well. but overall, it's a helpful productivity app :)	4
Really wish Dailys that I failed to do wouldn't just disappear, i still need to do them! Also wish I had a seperator in my todos - like maybe be able to assign them diffrent colours? i don't want to filter since i still want to see all but I'd still group em...	3
Really very amazing app. It is really helpful to me to manage my task.💯💯	5
As an ADHDer this app has helped me soooo much, I don't really use the gamified parts but I find the separate dailies/habits/to do really useful. 4 stars because it can be reaaaally slow sometimes like I'll click a task and it doesn't register it for ages, and it takes a long time to refresh which can be really frustrating. Would be so much better if I could tick off a lot of things in one go wit…	4
No offline mode, really? App is good and the idea is unique, but inability to work without internet in 2021 makes me sad	1
This app would be great if it didn't push veganism so heavily. As someone who's in recovery for an eating disorder that started with veganism (and my aunt is currently dying in the hospital from malnutrition and a stomach blockage from her vegan diet) I actually find this extremely disturbing. It makes me think that this app is pro-ana, or at the very least, they're really fatphobic, ableist, and…	2
Most organised I've been in ages! 10/10	5
Misses the point for me. It focuses too much on my avatar and the game and too little on the habits I'm trying to adopt. This is not helping me.	2
Good app and super cute but a bit complicated. Tasks and to-dos are the same things to me so I think it is a bit over complicated but good app.	4
A tad buggy but it's perfect for organizing my daily tasks and I was even able to join a community. So fun!	5
Only fun for kids. No option to put major goals that can be unlocked after certain skills or levels have been reached	3
Stop reading this and install. This is a daily part of my life. It's the best. It's free, it's open source, and the people behind it care about the community	5
The app is great, but I'd like you to add offline mode.	4
i like the concept of the app, it's definitely better than a plain boring habits tracker. but it's a bummer there are no statistics or calendar overview / history which almost all of the other apps have. and it would he a good idea to add an option to make the reminder notifications sticky.	3
"Server connection lost"	1
It says server connection lost and that my connection is not secure when I tried to access it through my email/google chrome. Was this app hacked?	1
The app is very good and i love it. But can you please be make the avatars more nice and clear.	3
It's a chill app if you don't chat. Mods interpret comments however they want. When asked for clarification on how to more clearly interact or come to an understanding, mods declare users can't message mods/ask about it in chats/message anyone else on the app about it. It's also okay for multiple mods to address one issue, effectively allowing them to "gang up". It seems fairly authoritarian to t…	1
Oh god, I was about to write the code for this app for myself, but you saved me. This is implementing Atomic Habits	5
Great app to remind but it's alright.	4
It's great, I have very poor memory and this app helped me remember my tasks and it's a lot quicker than writing on a table calendar. It also feels great when you are rewarded for doing things you've never got rewards for.	5
It's a good app.. but it would be great if it had a pomodoro timer too as the chrome extension has it already.	5
It's pretty decent for what it is, but it would be good if you could have pages for dailies corresponding to each day of the week, and maybe also set times to send notifications as reminders for each daily.	3
Brilliant.	5
This app is really well done at gamifying habits, chores, and to do lists.	5
I decided to install this app on a whim because I liked the visual style and thought the idea of a video game style habit tracker was cool. What I didn't expect, however, was me finishing things I had been putting off for WEEKS on the first day, and I instantly fell in love. Currently, I have developed so many good habits, I even floss. My only critique is the limited customisation options, but t…	5
Love the app: if I could make two suggestions, I would say that an option to have a UK date format would be easier and a chance to expand the viewing panel of the character and perhaps see some small animation would be fun.	3
This app is very cool and I think a genius idea and concept. This app really helps me with organizing my life. I also think this app is helping me honestly with my mental health. Struggling with depression and learning how to feel better with small steps everyday. I love that I can set my own goals and I truly feel better each day when I check off something even small. I am a video game fan and s…	5
Made me very productive in just a few days!	5
I been getting into this app since a few days ago and I already love this app!! It gives me the greatest motivation to do even the smallest things I tend to laze out so easily without being bored. I tried out a couple of similar apps but they are nothing compared to Habitica, the difference? New constant content always since years ago and ways to make your work rewarding. Hands down the most moti…	5
Very depressing. I put in the effort for quests. I got excited about my pending damage for nothing. Quest ends just before my cron and all my pending is lost. I haven't been able to use my pending anything for days. That's not motivation. It's devastation. It never matters if i task or don't if my whole turn is skipped because of timing. Working hard for just collecting stuff and never getting to…	1
Requires agreeing to a Privacy Policy and the establishment of an account w an associated email, username, password. 1) There is no reason why some company needs to know my daily stuff (or yours)! 2) Between banking, school, online retail, social media, etc I already have too many log-ins to maintain. Uninstalled before I got past 1st screen.	1
Cool as hell thanks	5
Think this app is amazing because it helps me tackle challenges and be more organized in a fun and entertaining way.	4
It would be so cool, as a parent, to have access to assign tasks from my phone to a child with ADHD's phone, so he knows what he needs to do for that day/week. I really need something like that!	4
As someone who really struggles functioning, I think it's really beautiful and amazing that someone would go out of their way to make this app. I just opened it up and setup for using it, and I already know it's going to be extremely helpful and fun. I've been using all kinds of different counter and planning apps simultaneously to try to function, but this puts it all together in an artsy way th…	5
This app is pretty good! I love it and I'm enjoying the features. However, it's kinda useless at situations when there's no internet connection. I hope you guys can do something about it... I am reminded of Google Docs, where when you're offline, you can still access some documents and edit them—though it can only save the document within that same device and it won't get saved and synced into th…	3
This app is absolutely amazing!! If you have ADHD stop reading and get this app now you will not regret it! As someone whose natural reward system is totally wack having this app with all of its amazing customizations, rewards, penalties, points, items, pets, community options ect. has completely changed the way I interact with my responsibilities in life.	5
Hey there I just wanted to add a suggestion that please add a notes feature for students ans other people	4
I have no problems with it. But i just joined, and I feel like I missed something. Says I can change my class in settings, do I need to hit a certain level first or... ?	4
This is a game/life helper, I don't use it as much as I should but I am really happy I have it.	5
Sounds stupid, I know. But it works, pretty well. So it aint stupid, it is actually kinda weird, but it works, like a charm. 5/5	5
This app is awesome!!! One suggestion though. I wanna level up and fight my friends. Somehow. Or fight quests or maybe dragons like old school pokemon style. Idk just food for thought!!!!	5
I have ADHD and chronic depression, I either can't remember what to do or can't get up to do it. this app has helped so much, Like helped more than my therapist. Thank you for making this app	5
Gets things done!	5
cool	5
I can't seem to equip any of my items. 😑 the rest of the app is great but ...	1
Habitica doesn't make new habits for me because i forget to do them	1
The special mounts menu is empty and doesn't show any free mounts to tame! My friend has the iOS app and has a free special mount!!	3
This is a great game.That said I think that there can be a few changes with the coin and gem system.I wish you could buy gems with gold(I think 50 gold a gem would be reasonable)because I dont really want to pay money to a game.I know the only way currently to get gems is if you buy them or a subscription.So please fix this and I will give 5 star.I found out that you can do challenges to get jems…	5
I like the app tbh... However it's strict haha, I do agree that it is helpful to some to improve productivity... But for people like me who can't cross out the tasks within the day and do it after midnight, when you loses health basically... It's not that motivating... So maybe adding an option where we can adjust the difficulty to our likeliness would be a good feature.. Cuz I'm already strict w…	3
It fails at signing in. I even used a VPN to make sure that the problem is not the country I'm living in.	1
So much fun! Love setting up rewards and this makes tracking even more exciting!	5
This is fantastic. Just an amazing way of tackling your life in an entertaining way. I have adhd, and I found that the various incentives and disincentives offered by this app, as well as the customization of your tasks (being able to set up daily tasks, to do lists, and habits) and community challenges to help you make some life-bettering choices. That's not even all of it. Give this app a check…	5
Very interested in the app, but character customization isn't working at all. I tried to just deal with what I had but it won't let me finish creating the character.	1
Idk i thought this would make things fun but it actually makes it more frustrating. The game allows you to kill monsters with your tasks a a team. But i think if you teammates kill it before your turn you just get rewards and the points are waisted.	3
Can't make an account. Username screen is broken. Every usename is taken no matter what you type in and no matter how long or random.	1
Best app ever!! It has legit changed my life for the better. I highly suggest you subscribe to get the most meaningful experience out of it.	5
A very well-made app, which really does make doing chores feel like a game. If only the chores themselves could be done in game... but unfortunately I don't think our technology is quite to that level yet.	5
Really liking it so far, would like to see a lock feature!	5
This is a great and fun app to use and helps me form good and healthy habits and makes my days more fun but I have tried changing my class and I don't know how I've level 10 and I couldn't change my class I use this app on my phone so maybe that has something to do with it	5
Too complicated	1
One of the best habit apps. I had it a lot longer then any other mental health app on this phone before. Its engaging, encouraging, and motivating to do. It's fun! It's amazing! (I un-downloaded it because I'm super bad at focusing and attendance, so i often forgot about the game. But if I was able to keep attending i definitely would get it again)	5
M9	5
I like the concept and the design. I wish you could get it without all the social stuff too. I know you don't have to do it, but it adds to unnecessary things in the menu for me. However, what made me uninstall it is that you have to be online to check things off and I'm not always online, so that doesn't work for me.	3
Me and my friend are using this to help us stop smoking cigs, we joined a party together and we're currently fighting the dust bunny's, but we think it would be cool if we could create our own party quests where we both share the quest	5
Amazing, simple, easy to use and a great design. Couldn't ask for more, developers made an excellent effort to create this amazing app. 100% recommended if you want to track/create new habits, or remove bad habits. All in all fantastic, 5 stars are well deserved.	5
this was the best app tracker ever for me. hope one day I get back, it has tons of features and gameplay-like habit tracker. and the community is always helping one another, it's lovely. thanks for everything, Habitica. - Ajux	5
This is a great app however I keep finding myself wanting to put an alarm or set a time. Also, if on the daily task or the to-do list, if you can add subcategories to each tasks that works up to the big task. If your tech people can work on this I would really appreciate it, giving you the full five stars 👍 p.s. I tried to fill your in app suggestion form however its keeps on saying that my email…	4
Helped turn my life around. I used to have so much idle time that I got super bored. Nowadays my day is full and fulfilling, I even find that there isnt enough time for everything I want to do. The challenges helped me plan, overcome anxiety, and even have a slimmer waistline. Habitica is a true force for positive change. Highly recommended.	5
Amazing!!! I am so happy I found this App. It has helped me set habits i was really struggling with. A must have for people who have a hard time with time keeping, following through on things and just overall life hehe.	5
Best app to manage routine tasks	5
Best app I have ever downloaded.	5
После скачивания приложения моя производительность выросла, лайк :D	5
This app is amazing. I am terrible at time management. So, I hate things like planners. Then I decided to just do checklists instead. Which had been proven effective. However, I wanted something I can use on my phone instead of my notebook as a checklist. Luckily enough I found this application. Thanks Habitica. You make life for a lazy student and language enthusiast so much easier! ¡Gracias Hab…	5
Floor so all cm A ex go DG an ad also XL XL day so so cm XL ya JJ ha ha for half of is it'll DJ man ask so so all all XL XL idk so XL zzz tapas LLC two gal	3
Imo, Habitica stands out among other habit trackers because of its party system. I invited other friends to use Habitica with me to form a party, and for the last 2 months we became productivity monsters. I do think the game is a bit unbalanced tho. The mage is BY FAR the best class. Also, I think there are just too few questlines, so we pretty much beat the "game" in 2 months. Habitica is amazin…	4
honestly I don't really review stuff. but this app helps me a lot, it helps me to self reflect and be productive. it also helps me remember the things I forgot to do. What a lovely Idea devs.	5
Lovely habit tracker with a fun rpg twist	5
I've tried a LOT of productivity apps and noting has EVEN COME CLOSE to habitfy. This app is amazing. You can track your good habits, bad habits, you can set daily tasks, you can have to do's. You can buy pets, earn them, or hatch them with eggs. You need to be productive to earn money to feed your pets. You can buy clothes. You can customise the look of your avatar. You can join guilds of produc…	5
I think it would help lots of people, however for me it was too complicated to understand properly. Still worth a try, just not for me :) Oh also, there are very few customisation options for your avatar, they don't even have any unnatural hair colours and they only have a few styles	3
P lookup,a	1
So far I like the app a lot. It's motivating for some reason. And gets me to do tasks I would have other wise procrastinated on. It gives a "reward" aspect with positively reinforces the behavior. Truly helps me.	5
Why this is 8bit	3
My wife and I have been playing together for over 2 years now. Clearly a passion project. Grateful for the developers!	5
Absolutely amazing! I had a really good time with this app! 10 out of 10 would reccomend!	5
I really wanted to like this app, but honestly the set up and getting used to it didn't work for me.	2
This has been a big help bettering myself and my son plays in my party to keep me honest. Subscribed after a week of playing to support the devs for their wonderful app.	5
One of the best apps I've ever used. It doesn't just inspire productivity but also enables me to keep track of what needs to be done efficiently, thus allieviating a ton of stress. So rewarding, and love all the customisation options. I think everyone could benefit from trying this one. I'd like to be able to categorise my tasks in some way, colour coding would be awesome in future updates if pos…	5
It would be nice to change the date settings to DD/MM/YYYY for the Todo tasks.	4
The idea is perfect but unfortunately I am experiencing bugs. The hints show up every time I switch between tabs and I couldn't find a way to stop it. After making my lists and habbits, when I clicked the icon to tell the app that I have done the task, a spinning circle showed up and it's still there. Restarting the app and even the phone didn't help. My internet connection is ok and I don't know…	3
Omg I love this app so much. For some reason I'm so pushed and motivated to actually do what I need to do now thank you alot developers for making such a masterpiece This app is defined underrated because you alot deserve all the praise yall get.	5
I love the concept and this serves very well as a motivational tool. Only improvements i can think of: i wish you could set different levels for the +/- on the habits screen. Like gaining small when you follow a good habit and losing big when you fail, etc. to provide greater motivation to follow good habits and prioritize more. I find it hard to find a comfortable difficulty for some tasks, so m…	4
Nice, help me to create nice habits and checking out my task of the day	5
At the time of writing this review, I just hit level 11 and selected rogue as my class, as someone who suffers from ADHD and bipolar type 2 depression, this app is really good for holding me accountable, we as human beings want that instant gratification that we cannot see when we do tasks for a long time, but this app helps give you that instant gratification, which keeps you doing your habits. …	5
Cool concept, but it's not rewarding enough for me. The act of checking off habits is very satisfying, but I have no desire to upgrade my extremely bland pixel character with any of the severely limited and boring equipment or rewards... not enough dopamine or creative design in my humble opinion	2
I like this	5
I LOVE THIS APP SO MUCH I COULD GIVE IT 20 STARS. BLESS U, CREATORS	5
The concept of this app is really nice. You can gamify habits, dailies and to-do lists with it. The UI is easy to navigate through and, it is clean and simple. It is helping me a lot in developing new habits and keeping up with my daily tasks. The fact that it is open-source is also amazing.	5
Neato!	4
I use the app and website all the time, but app it loses data when your connection isn't strong. There's supposedly some "pending" state but it doesn't work correctly	3
Wanted to delete my account. There is no option to do so. Don't like how the app is set up.	1
Felt like they were trying to steal my data when installing. I invest in crypto.	1
This is a LIFE-CHANGING APP! I love this! I wish the devs all the best and hope for more wonderful additions in the future. Good job!	5
Bloated, not well designed, has bugs. I couldn't even register because all possible names are already taken. This takes me back to early 2000s Internet	4
I love this app! It would be great if there was a list widget with all my habits, just like with dailies and to-do	4
good as	5
I don't know why but the lack DD/MM/YY time system make me uncomptable when using this app.	4
Love this app, it's really cute and fun to use and is genuinely helping me build good habits. I absolutely LOVE the wide range of pets available, and couldn't believe you can even get pet nudibranchs on one of the quests!! This gave my nerdy little scuba diver heart such joy. Thanks for an awesome app guys! P.s. it's totally worth subscribing, unlocks access to so much more awesomeness	5
Didn't all think this will work but it definitely does. I need more coins to play video game so I do something to earn it. I wish it had always been this easy.	5
I just installed this app and it is already amazing!!! I suggested it to my brother also.	5
I actually got way more productive and also started to drink more water out of habit and not just when I saw it on the app. Definitely worth trying, I love it.	5
I downloaded this bc I thought it was an interesting idea, but after researching it's privacy policy, I can't feel comfortable with it at all.	1
Source of motivation for good habits	5
This app is incredible!! I have ADHD and its the only thing I've found that actually helps not only to start new habits, but the daily to do lists and daily, weekly or monthly task lists are incredible. I use them for everything from remembering when to clean my bathroom to brushing my teeth daily. The gamification aspect is incredibly powerful, as not only does the upgrading give a nice dopamine…	5
Love this app. I have ADHD and this app helps me organize my life, do my daily tasks, organize my to-do list, and quit or do unwanted habits. I recommend this for anyone who struggles to organize themselves and complete simple day to day tasks because of ADHD or any other disability or just for fun! Because you like pixelated games.	5
I've honestly enjoyed this game and actually have been keeping up with my habits because of it, however losing health and levels and gold when my health depletes kind of takes me out of the game and feels like all that progress I did for the week was for nothing, I understand losing health during a quest but why do I lose health when all I do is check off my habits and stuff?	4
Pretty good for keeping on track of daily tasks. Needs more charactor customization :p	4
I have never been so productive!	5
Best way to be organized. I love this app, this app helps me keep track with my busy schedule and have some fun aswell.	5
Me encanta el diseño de la app. Es muy creativa y extrínseca para comenzar buenos hábitos. Me gustaria que tuviera un widget de inicio para marcar tareas desde la pantalla pero de todos modos funciona genial. La recomiendo	4
Amazing app for gamers that need motivation to complete tasks. Your daily tasks are modeled on Health and XP and it makes chores and forming healthy habbits engaging and rewarding	5
Great App! Really good for making habits and tasks easy in an RPG Style	5
I love using this app. It seems to be the only option that can assign points for completing each habit, daily task and to-do and then set up your own rewards to use those earned points. I needed more motivation to get stuff stuff, and this gamifies things for me. However, I would really like a way to reuse completed to-dos. I want to be able to click on the completed task and then save it to have…	4
It's working, For now anyway Edit: still working, really is improving my life a lot.	5
I expected just a normal to do list but with a little pixel character and a health bar. They have actually laid down a lot of though, both into the tasks part and the game part and it feels very polished. A very welcome surprise.	5
Motivational, fun and brilliant app with pixellated images and an old RPG feel. It helps you actually finish your to-do list.	5
My habit builder app. The game rpg part is an add on but I use it mainly to track my habits and daily to do lists.	5
I really like the concept. It's presented in a way that allows things that you may not want to do feel a little bit more like an activity than a burden upon your shoulders. It's also really good to have a visual representation of what you've accomplished to give you a better sense of "Wow. I DID that". The only thing I can think to change as of writing this is that it's a little annoying that you…	5
It's very motivational and I enjoy collaborating with others so we can encourage each other.	5
I love it!! only app that geniunly keeps me motivated to do things! I also love how the free version doesnt withhold the basics, and subscription isnt forced [although once I have the money I definetly will be!] The wheelchair option in the avatar is super cool aswell. could never rate it anything other than 5 stars!	5
I have ADHD. This app has been so helpful! The little hits of dopamine from accomplishing tasks and earning points is exactly what my neurodivergent brain needs. It's cute, it's easy to use. I was able to input all my chores, even annual ones! And input habits I want to encourage or discourage like getting takeout versus eating at home. It glitched on me once. I just closed the app, reopened it, …	5
Amazing app! Like it!	5
L. Llp... Lmp 😃😊😃🤗km Loool	5
I love the concept and really want to use the app, however, I don't want my to-do list items to disappear once completed. They need to go into a space for "tasks completed" or something similar, so that they can be referenced if necessary. I will have to use a different checklist until this is possible. Edit: It does in fact save your completed tasks. I just overlooked it. This app is a must have…	5
This took a bit of a while to get into but generally speaking this is a great app if you want to gamify your goals and it has a very helpful wiki and community if you get stuck. I only wish it had a feature to invite friends to join you easily.	5
Please make the dailies widget purple again!! Why'd it have to go black/white?:'(	4
I really wish there was an option to complete X/Y per week for tasks. And and option for the todo list for a weekly repeating task to not refresh daily! Besides that very cool concept! Having parties is great for accountability too!	4
Nice app to take back the control of your life.	5
Awesome app, if only they had a feature for storing data whilst offline, and then syncing it when you go back online, that way you could use it whilst on airplane mode, which I find super helpful for staying productive.. As it is you can only use the app providing you're online at the time.	4
This has been such a huge help with remembering tasks and staying on top of things	5
I want to like Habitica, but I feel like it needs more. Actually, it has more! There are quests that might be fun and motivating, unfortunately you have to join a guild to do so. It seems like one has to sort through a long chat then apply to a guild and then wait... It all sounds like time I could be spending completing my tasks for the day. Devs: Easier guild process.Maybe just a random guild o…	2
Great application.	5
So good. Would be nice if there was more armor to buy though.	5
Love this app. I use it every day. You can set reminders for one time tasks, and set daily tasks and habits you earn coins/XP for. Makes boring life stuff feel more like a game and I can glance at it and figure out what I still need to do that day. Lot of character customization options without having to spend irl money	5
Terrible in app onboarding. Just a simple question of how to check off a task ond they want to send me to their community forum to post a question? Uninstalling.	1
Amazing! Helps me remember my tasks and not blow them off. Love the gryphon logo.	5
very nice very nice	5
Omg i just love this app! The way it's made and it's designed. I was searching for the "best" app for me (to keep track of my habits and to-dos) and i found the right app for it.	5
I loveee this app! I'm sure it will motivate me to do my tasks. I just hope there's like a timetable for schedule (idk if there's a timetable already i just downloaded the app) It will be very helpful.	5
Just got this app today, love it so far. It takes a bit to learn everything there is to it, there's a lot, but worth the time and effort so far!	5
Really helps for people with depression who like video games. Not perfect but thats okay. Thank you for this.	5
I love Habitica!! It makes staying healthy fun. I'm held accountable for getting tasks done, without making me feel pressured. I look forward to doing chores and tasks that u I wouldn't normally, because I know it will help me raise pets, complete quests and more :)	5
BEWARE OF SJW MODS: you'll be walking on eggshells; they are ban heavy. You're better off with the Any.do app anyway which is way more practical.	1
This actually works!!!! I'm so happy I found this! I've finished things I needed to do for a while and I feel amazing!!!	5
This app has literally changed my life, if you have any kind of ADHD, mental health or executive function issues, this app gameifies any habit/task you need to complete & I have found it immensely useful to change my behaviour! Also the community and characters are just the cutest. Highly recommend	5
Takes a while to add stuff at the start but is useful	4
I love this app and the idea so far. But subscription prices are really just too expensive. I would like to support you guys, maybe you could make a subscription for supporters with less cost and less extras.	5
It's fun and helps me keep my tasks on track. A little buggy, sometimes it shows no tasks, but restarting fixes it. I wish I could make a periodic task that didn't reset the next day.	4
I don't want to sign in, I just want to create a list of chores with point values for three people on one device.	1
This app is a great way to keep up with tasks. The leveling mechanic and rpg feel really make it fun. This is the first app I've gotten others to use and got a subscription for.	5
Great app with interactivity to motivate to complete your tasks. But I agree with other comments, really needs a calender view, and it would be perfect	4
Good concept but seems a bit buggy so far. The positive/negative setup is not the most intuitive thing to figure out, as well as some other features. While trying to initially set up my tasks, I tried to adjust the streaks, and it would not save my adjustment. So idk. The app could use some more QA I think, & maybe some work on UX? Hoping it all gets better over time. The character creation is cu…	3
helps me out. a lotttt	5
All good but just one problem, why notifications its not pop up.., please consider fix it if a bug	3
I haven't gotten any fox eggs in about a month and I was really looking forward to finishing them as my first collection 😕	3
This really is a great app and idea, but it is sorely lacking a calendar view and the ability to schedule a specific time of day for a To-Do to be completed. I would love to plan my days through Habitica, but I literally cannot because this functionality is missing. Please add this! Thank you	3
I love habitica :3	5
This is actually a great app and I find it motivates me to do the things I struggle to do on a daily basis way better than any other methods I've tried. However one really annoying thing is that if you leave the app running in the background and come back to it, none of your tasks will load. You have to exit the app completely to get them to work again. If this gets fixed I will change my rating …	3
Its amazing app, especially when you found a nice group	5
You cannot log out from the app and you can't add your own profile picture. So be aware of that but it seems like a legit app to me.	1
Good app Bot Different Service then other Habit & Self-improvement...	3
It's a great idea. I feel it's very helpful and productive	4
It's a nice app that helps me work better, manage my time and alot more actually. It's good, I reccomend it.	4
Great app for time management	5
Great app. Really helpful. I have anxiety disorder and depression and this makes it easier to complete daily tasks that would otherwise paralyze me, makes them seem smaller and gives me rewards when they're accomplished. It's nicely designed too.	5
I accualy tought that this apk is overkill, but it accualy has some features that I couldnt've found on the other apks. Overall amazing	5
I adore this app and especially it's community section, finding like minded people who are struggling with the same thing as you is such a gratifying feeling. Excited to see how they improve over time. :)	5
It's a great app with creative collaborative features. But the sad thing is that it requires active internet connection to work (which I don't have all the time unfortunately) I'm uninstalling it. But for those who want to have some fun in doing tasks and explore a supportive community while at it (everyone there is really nice and are happy to help out). However, the sounds don't sync when I cli…	3
The best habit tracker app out there for Android.This app really motivates me to complete my daily habits and help me to be productive.	5
I have yet to come across anything I would describe as "content" and I've been using this for weeks. Not a bad app in terms of trying to form good habits but... It'd be more effective to just use my normal to-do list apps where I can set notifications to not let me swipe them away after the due date, effectively holding me to completing the task.	2
Such an inovational habit tracker! It really suits to people like me, who love to play games and want to be aware to our productivity. Thankyou!	5
Sugerencia: me encantaría que agreguen una opción de búsqueda de una prenda de vestir al elegir el equipamiento ya que cuando tienes muchos disfraces es muy molesto tener que estar buscando y mirando uno por uno. Por ejemplo, que pueda buscar "armario encantado...pirata" y aparezcan todas las opciones que tengo disponibles para ese nombre. Gracias!!	5
Only a.couple days in and my life has improved and me and my friends hold each other accountable. This app is awesome	5
wow... It's so cool, really	5
Great app. But, the more utilities that are provided in the app are little bit confusing to new users. And think they should focus the main purpose of the app i.e. Habit tracking.	4
Very interesting concept and fun way to do tasks. Especially for me who loves games and usually gets distracted from it xD. Some improvements needed especially with user experience. Such as, dont frequently change task colour for no reason. Makes it hard for me to recognize which habits Ive done bc usually it will turn yellow -> green (if done). Suddenly the next day its just green -> green?? Als…	4
:night_with_stars: emotions won't show up on mobile but it does on the web version	3
I used to use this app often & got a subscription to it. Then I needed to financially cut back on stuff, and this app was one that got cut. I never deleted it, but I canceled the subscription& stopped using it. Then, after about a year, I started getting charged again out of nowhere! I know for certain I got a new card since then, so I literally have no idea how they got my new info, but I'm real…	1
I love the UI of this app but Please fix the reminders in this app... It doesn't work at all... I set them but it doesn't send a notification or anything to remind me. Thankyou!	4
Really enjoying the app so far, my only complaint is every time I open it all of my data is gone, I was very upset at first because I spent A LOT of time planning my habits, tasks etc but I managed to fix this by restarting the app so it's just a slight annoyance but it does happen every time I use it. Otherwise, very motivating if you have that videogame motivation like myself!	4
Habitica is awesome! It has everything I was looking for in a to do list app, and it's so fun! It has a lot of bugs though, and the UI can be pretty frustrating sometimes. There is definitely a lot of room for improvement. I am submitting lots of suggestions and bug reports.	4
Literally the coolest app I've ever used, I've never left a review for an app before but I was so happy with it I had to!	5
I rarely give an application any review. This app however is very amusing, the widget, the UI, everything about this app looks amazing and well made. From day one, my daily activites is already manageable. Its like as if I am in an actual video game whereas there's goals and rewards that's visually entertaining. Although, there are some minor bugs which are still tolerable. Props to developer!	5
I appreciate the positive community of people using this app.	5
I like this concept and design.It give some motivation to do all my plan and homework.I am glad to find this app😆✨	5
I don't usually do review, but you guys made just the perfect app. I'm very much SATISFIED! Still level 5 lol, it's fun being productive with this app.	5
Absolutely love the app. Helps my friends and I organize our routines better, change/improve our habits, and have fun while doing it. My only problem with the game is that you can't set differing difficulties for succeeding/failing a challenge. Sometimes I'd like an easy challenge/daily to not reward me greatly, but punish me more severely should I fail, or vice versa.	4
I like the concept of this app, but notifications only work half the time, and usually only happens when you open up the app which defeats the purpose of notifications. If notifications worked 100% of the time, it will be 5 stars, but I will look elsewhere until the notifications are fixed.	3
It is amazing. Tips to the developers, you guys can set up already planned tasks for new users so that they know what to do and modify them.	5
This app has all the hallmarks of something done with a small team of developers, so it certainly has room to grow all around. That being said, it has helped me boost my productivity more than any other method. If you're a little nerdy and struggle with accomplishing the things you wish to do on a daily basis, the gamification of your productivity genuinely works. I refuse to rate this any less t…	5
A great way to "gamify" your habbits and to-do list. Form a guild with friends, and help each other with group accountability. Easily and endlessly customizable (perhaps a little daunting to initially set up due to options).	5
I used to use this app a LOT. So I came back to start using it again. I got everything set up, but my tasks, to do, and everything does not load in. I love this app but in its current state it is broken.	1
I do really like the app but I think the to-dos aren't that good. I usually like to schedule to-dos for atleast 3-7 days at a time, so it would be nice to be able to look for to-dos of a particular day without having to create a separate tag for it. Also, it would be nice to have an option to look for to-dos which include all the tags I'm looking for. eg. If I choose tag 3rd July and Physics, id …	4
Incredible app for people who love rpg and wanna to improve your life	5
Effective! Helps me remember to take my meds	5
It was very helpful for me to stay productive	5
I used to do this in my head when i was a young lad at my first few jobs. I was always bad at social situations so in my head i would level up from doing stuff and i kept putting points in vitality instead of charisma 😭 good stuff bois n germs	5
Incredible idea and concept but this app just isn't user friendly. It's messy, crowded, and jangled. It needs an update asap	3
Great app loving it completely It really motivates me to keep active But could you please make it usable offline	5
Incredible app, I love the feature of being able to talk to others and complete actually fun quests! It's really fun and creative, the community is also really great! The app is a bit buggy and it does kind of suck that you can't really upload images without links and even see them on the phone, but overall pretty great! I also love how it has one of the most affordable subscriptions out there an…	5
It's a great app but I couldn't find a effective way to set reminders!...if u r looking for remainders then it is not the good app for you...otherwise it is a awesome app to track habits and a innovative way to encourage us for tracking habits...need some improvements...	3
This app turned my life into a game. I have never wanted to improve my life more than I do now. With Habitica I can level up my character with real-life experience and I have to keep up with good habits so my avatar doesn't die!	5
2021 update: the app continues to lose data and just be janky in general. My streaks are constantly being lost even though the streak is a weekly thing and I've done this habit 6 days in a row? Sometimes the app opens and just displays no data, no habits, no dailies, and has to be force closed and reopened. It's all really discouraging, I'd hoped the problems had been worked out since I stopped u…	1
Tasks won't load until I restart the app or switch from Tasks to something else and back again. As a result, none of my reminders are working. I really like the concept and want to use the app, but this bug is KILLING me.	2
Great habit app. I have used this app on and off for years. It really helps with habits and getting back on track with life and priorities for me. Thank you so much Habitica! The first person to introduce this to me was Jujimufu back around 2008-2009ish.	5
Half the times I open the app none of my entries are there so I have to close and re open it until they show back up	3
I've been using it for half a day and it already has helped me so much! the layout is simple and easy to read. you can manage your habits, daily tasks and make a to-do lists. my only suggestion is to add task's colour customization - categorising your tasks by colour would make everything even easier.	5
挺好的，特别喜欢，像发现了新大陆一样。但是，我不明白为什么，总是在第二天，我的设置习惯，任务，代办，和奖励，统统都不见了，这样我很困扰。。希望能赶快发现bug，并解决它吧。 好吧，我刚刚又重新打开了这个app，内容有重新出现了。😂😂这样一惊一乍的，心脏受不了啊	4
Love the app, although I have to constantly restart my phone since the habits and dailies do not show up unless I do	3
The best habit tracker out there! Must own for everyone.	5
This is the best Todo list and habit tracker I've ever used. Thanks so much to the team!	5
Such a godsend for gaining good habits!!! Highly recommended for people with lower self discipline like myself!	5
Difficult to figure out about how to set the habits up; easy, difficult habits, etc. Too much time spent on the phone to track simple habits.	3
Responsive devs and wonderful app. This app does have random bugs from time to time. However, the team rolls out fixes very quickly! The experience of the app is wonderful and it has greatly improved how I structure my time and accomplish goals. Highly recommend!	5
This is great! I've always loved playing games, but I would do pretty much nothing except play games. With this, I can play games while doing what I actually love to do- which is draw and study!	5
helped me with daily chores and tasks. motivating, id recommend it to anyone, really.	5
THIS IS LIFE CHANGING AND IVE NEVER BEEN PRODUCTIVE IN MY LIFE 5 STARS WELL DESERVED! I have a suggestion it would be helpful to have your daily streak data remind you of your streak in a calendar, I am unable to elaborate but it is called the Seinfeld Strategy.	5
This app has been so incredible for helping me stick to a daily morning and evening routine! I wish there wasn't so much focus on the social aspect, but that stuff is all optional and the core mechanic makes keeping yourself on task rewarding. Worth paying for, in my opinion!	5
This app makes managing my ADHD so much more manageable.	5
This has been amazing for me. I've had trouble doing many of my chores, but this app has given me the motivation to be able to do them consistently! I have been using this app for two months now. I've also enjoyed the community. The game aspect is a lot of fun, and they are good at keeping it interesting with their seasonal Galas!	5
Said: login. I said: no thank you. I prefer Uninstall.	1
It's a great app for shaking out the mind fog, really cute as well. It's a little overwhelming at first, but makes sense after spending time with it. It would be cool if the app had different skins, 8 bit is nice but 16bit would look even better. An opportunity for aesthetic user generated content perhaps? I'm only leaving off a star because sometimes it glitches and won't show any of your tasks.…	4
its trully amazing! simple, organized and fun.	5
This is a great app that keeps me, a lazy person, going. However I'm not too satisfied with the UI. I'd say the tasks page looks the best but some others need to be fleshed out more.	4
Life changer if you are a gamer and wanna be productive	5
fun, but then one day I chatted with a couple people and i got banned -- I didn't do anything against the guidelines.	2
I can't login to My account. Entered my user and pass and nothing happens after click. It has stuck 😔 I have access just on my laptop	3
I love it	5
This app is really great! It helps me to follow my tasks. It really helped me to increase my productivity. Thank you for creating and sharing great app with us.	5
these app really good but one thing why these app always need internet why not you can make both online & offline mode it better like for simple tick mark it need an internet access to do	4
Can you pls add times in the to do list And pls fix arrange the to do list widget by the due dates	5
Its just great	5
Never have I ever...written a review on an app. Such things are beneath me. Having said that, I was super annoyed that I'd have to reenter my to dos and dailys and basically my schedule of stuff to keep track of. Great idea for an app (especially for us gamers) but not so good on ze other stuff. Will not use. Delete. Game Over.	1
Good 👍	5
I love gamification, and this app makes it easy and fun to gamify my life!	5
Evey time I open the app it says I dont have any habits set up even though I do. I have to force close and restart every single time	2
Are you ADHD, bad at lists, and a gamer? This is for you!! This app seriously has made existing rewarding (not that it wasn't before but like...how much cooler can you get?) I love being able to check things off and recieve cute pets and items. My ADHD might kick my butt, but now I'm kicking boss monster butt!!	5
Really enjoying this	5
I'd rate 5 stars if the app didn't send reminders for stuff I've done already. That should be a pretty obvious feature. This might be the best app on the store otherwise, but this one issue is really really annoying.	2
It would have been a lot better if the graphics are improved	3
Great app, life changing	5
I am really disappointed that this app is not rated 5 stars, like this app is so good	5
I don't usually leave reviews, but I had to for this. This is just a brilliant app, that's done wonders for my productivity. Keep up the great work!	5
One of the most interesting and creative habit trackers i've ever come across. I looove the interface and the fact that you could message or team up with certain people, even your siblings and try to outdo one another. The challenges with other communities are so helpful!! If you're a competitive person with no motivation whatsoever, this is for you.	5
Good concept but just too much to get started	3
Broken	1
It is a great app, but somehow, in my phone with WiFi connection, a lot of buffer appearing when I want to change the task or create a new one. Because of that, it become messy; I did a task twice, or my task is not saved properly. I check my internet, but that's not a the problem... What a shame... :(	2
Recommend to friends and family. It's just a fun to do list. If the app worked as well as the website (refreshes and guild search navigation come to mind as necessary improvements), I'd rate it 5 stars. The website is great too (better but you really should use a computer and I never rememberon the computer)!	4
App is very buggy. Frequently freezes or fails to update tasks.	3
I have never found a better way manage tasks in my day to day life. The gamification aspect makes logging into Habitica more like playing a game than crossing things off a to do list. HIGHLY recommend	5
WILL change your life!	5
The basic functionality is straightforward, and for someone with ADHD the gamification of my daily tasks has helped me be on track a lot better. The more complex functionality of the 'game' is only unlocked after you get further along in your progress. That seems to be a very good choice so new users can focus on building out their daily tasks and habit tracking. I heard about the app in passing …	5
Really helps me a lot to track what should I do and avoid to do. Thanks to this app. Hope that devs adds more rewards that I can look forward to or can you please add exclusive market just for your subscribers, items on that exclusive market can be bought by coins and not gems.	5
This app is AWESOME! but I'm tracking my habits, mad this app does not have the option to see four progress (stadistica, streak days) and for this reason I uninstalled this app.	3
Honestly really enjoyable just wish there was more customisation	5
I love this app but for some reason whenever I try to feed my white tiger my app crashes. I've restarted my phone and everything.	1
BEWARE: This app can change your life. This app is a great source of motivation and gets me to do my tasks and habits every single day. It helps me to break bad habits and build new healthier ones. The gaming element is just too good. Hats off to the developers!!!	5
Greatest App of my Life: why use anything else?	5
Has helped me form new and terrific habits as well as pick up old habits that i had dropped over all i rate this a 6 out of five	5
Do download!! Developers: I Would love to sign up without email or anything, just as what is called guest	5
Great way to help stay motivated and organize your routine. I also think it would be even better if we the avatar was bigger in the app layout.	4
A productivity app that needs more attention that it really needs. Yes, it really does deserve to be a world tier app, something every child, teenager, or adult should have in each of their phone. An app that not only breaks unpleasant habits, and promote useful and reliable habits, but also consequently make you enjoy the process. The company behind this deserves a raise. I believe being a billi…	5
I cannot see any item or even my customized avatar. Rest is ok, but it is not fun to not see any item or character.	2
why there is no arabic language in the app	1
Wonderfully organized and simple as well as fun and helpful! No ads and a lot of options without premium.	5
OP	5
This used to work fine but now none of my tasks, habits, dailies show up, except the first time I open it after a reinstall.	2
This app is awesome for encouraging habits since it is satisfying to progress like a game. I love the pets we can get. If I could find a thing to improve, it would be adding an option for a separate to do list for "today" and "later." That way every morning, we can choose a few to-dos for today from our long list. Also, sometimes the app says I have no habits, dailies, to-dos, etc. when I open it…	5
Super app. This app make me more productive and make life more happier. But 2 suggestion: pls make android app offline mode and ticked task should be go down. This is a optional suggestion : make a option to fav 3 task which stay at top of the habits and dailies which is more important task then other tasks . It will be more useful. Pls make this suggestions reality pls.❤️ Love you guys.	5
Awesome app	5
I do love this app but recently it's been very slow. a lot of times I'll have to open and close the app. it buffers a lot. this is a very recent thing that I've seen other reviews talk about. when this gets fixed I'll rate 5 stars again because everything about this app is brilliant and I love what you guys are doing.	4
Great tool for people who have difficulty completing tasks	5
This is an awsome app. I got so much done with it. There were a few things that could have been tweeked or adjusted. I also have adhd so i constantly forgot about it. Leaving a bad streak on the character stuff. But i loved it and it was alot of fun to use.	4
Wont save my daily tasks , habits etc	1
Interesting and powerful app for organization and education. However, there is one big drawback - the application does not work without the Internet.	3
TYSM FOR THIS I CAN'T EXPLAIN-	5
I am loving this app but I don't know how to get the diamonds 💎 on it.	5
That's what I've been looking for for a long time.	5
I had a great time using this app, and it helped me keep on track, until one day it just crashed and kept crashing! I undownloaded and redonlwoaded, and even happened to switch phones, but it just doesn't work. Needs serious fixes.	2
Can't make a FEMALE character? Byeeee	1
Where do my entries keep disappearing to? I spent hours setting up Habits and Dailies yesterday. Used a bunch. Today? Effing GONE. Whiskey. Tango. Foxtrot. Thought / hoped it was a fluke yesterday when entries would vanish every time I'd close my phone or the app. Nope. App is exacerbating my existential crisis! I could chew steal and spit nails at this point. #RageQuit	1
I. Love. This. App. My husband and I both use it to keep each other on check about our self-care, our housework and much more. I love the Quests, and the small customizations that make it worth it to check in everyday. No complains!	5
Functionally very very limited. Try setting up a habit for every x days, weeks, x times per week. No rescheduling, no reminder settings (remind x minutes before, remind on time) No sound /notification settings, you can choose a sound theme, tho no idea what it is or if I'd like it. On s plus side the rewards are nice and creative and you can pay to get more of them.	1
Has helped me a lot with keeping organised. I like the multiple features and flexibility. Sometimes the chat system lags and I would like a 'repeatable to-do' for things I like to get done by the end of each month/week and not on a specific day, But on the whole excellent.	5
i really love this app but it keeps crashing. As soon as I open it, it closes so please figure this out.	1
Probably the best D&D version of keeping up with habits and chores that I've seen. Some are either far too complicated others are far too simple and neither have graphics as cute as this	5
Amazing app! Habitica helps me a lot with managing my schoolwork! I do have one request though. Could you add a sorting feature for to-dos? It would be really nice if I could sort those by due date easier	5
Nothing else has been able to help me be so consistent with my habits.	5
Excellent Its only my 2nd day using the app & it was exactly what i was looking for to organise & push myself. Very simple ui, with explanations too. And it feels like you are actually playing an rpg game - with life been the dungeons you face. Seen an improvement in my everyday life. Highly recommended.	5
Could someone please explain how to get hour glasses and change your class to a mage or something?	2
After presenting the new update, I can no longer log in to my account. They will not even send me a password change email. 😐😐	1
I am currently trying to get the hang of this app to recommend to certain students. As of now, I have been loving it. I feel compelled to complete certain tasks to get exp and help other complete certain quests. It is quite a blast.	5
purely because there's no way to reset an account and you can have multiple accounts tied to one email which causes myriad glitches ¯\_(ツ)_/¯	1
So at first this was absolutely amazing, I never intended to use or for productively but as a mmo game irl, but after me and my little bro excitement we realised that. IT DOESN'T HAVE AN OFFLINE MODE IT REQUIRES WIFI, WHY IT'S AN APP	2
It is crashing every time when I'm tapping on "Task Title"	1
Awesome app for productivity and self improvement... especially for gamers	5
Checklist within tasks doesn't work. I do like that you can set recurring daily things, but if I have to look for another app to plan and manage chores, then it's not particularly good.	2
Grazie. Nient'altro da dire.	5
I really like this app just a couple of extra things I would like: (1) An option for weekly tasks that need to be done once a week but not necessarily on a certain day (2) An option to postpone a daily task once if I know I'm not going to get it done today but will definitely do it tomorrow instead.	4
really good and fun app	5
Executive dysfunction ruled my life until Habitica	5
It's a good app and it's gotten me to do a lot better, but sometimes I'll accidentally check off a task and there's no way to reverse it. An "are you sure?" button would be nice Update: Actually checking off a task is possible after all so I added another star.	5
This app has made meeting my goals fun. I enjoy defeating monsters and going on quests with other players like in an RPG	5
Fine	5
Why would you ever make the rewards for your good habits purchasable? That takes away a good portion of the motivational aspect. If that is your preferred way of making money, then add paid things (like backgrounds or the mouts) as paid products, and gear as only earned. Incentive is the only reason I downloaded thos app, the bypass kills it. Also my tags keep disappearing, and my tasks just jump…	3
Good app and nice concept. It will be better if atleast can keep track how far we have progressed in number of completed task, which can be seen per day/week/month. I am still not sure about how to count reward point, but it will be good if we can set reward by our own, instead of system default. Also, I found reminder function is not working.	3
Helped me to properly grasp how much I can actually manage to do in a day via multiple avatar deaths. I'd like to experience more of the RPG side of the game but with my bad health forcing me to take breaks quite frequently, the attraction of party accountability is nonexistent. Not to mention that I'm not using this app to make friends or socialize ‐ I'm using it to keep my goals realistic and m…	3
Excellent way to gamify getting stuff done every day. I particularly love the hatching potions/pets and costumes.	5
Pet feeding is really janky. It's pretty frustrating that it takes weeks to save up enough food to evolve a pet into a mount and then I do it and I get an error saying you do not have this mount. Didnt get any of the food I used returned so just a waste of saving up for an error :/	1
I like this app a lot but theres one bug that's been bothering me. even though I have in settings for my dailies tab to default to "due" it's still always "all" its quite annoying. I've waiting a couple updates to see if it was fixed but still hasn't been	4
Great concept to develop good habits. The Rpg elements are good and we feel like playing a game. Keep up the good work!	5
I want to give this a better review, really I do, but... The RPG element dies off pretty quick as you have basically bought everything worth buying by level 30, and it's all cosmetics, which includes pets, from there. Also? Can't reorganize your task list. At least it seems you can, but it always pops back to the way it was.	3
This app is a great tool for keeping a todo list, tracking your behaviors, and building habits. On top of all that it also: 1) is open source! 2) has a great community. 3) connects you with others to help you meet goals. 4) is a fun game! Absolutely one of my top 10 apps.	5
I really love this app. It has simultaneously helped me cut down on my spending and substantially increased my productivity. I don't participate in any of the RPG elements - I just use it as a habit/reward tracker. One thing which has been BUGging me for a few weeks is, that often when I open the app, all of my habits have disappeared. I then need to close and reopen to get them back. Considering…	4
Useless. I don't understand the point.	1
I like this game. It's fun	5
Freakin. Awesome. Would love battle screens and improved animation but WOW, best no pressure app for getting things done and taking care of yourself. Its dumb, BUT IT WORKS!	4
Everytime I bring the app back from background, all habits, dailies, todos disappeared. Need to kill the app and reopen to bring back the lists everytime... annoying	2
I love the app but my only problem is that it needs constant wifi or internet access i think by making it function offline, when one has internet access they upload their progress, intead of constantly giving me" NO INTERNET CONNECTION".	4
I'm getting logged out of the app, and have to login every time I open it.	3
It motivates me.	5
Lovely app. Would love to be able to preview the next day's dailies to plan my day better as this app has replaced my calendar app.	5
This app has really helped me get things done!	5
They take money and make it hard to unsubscribe. I don't trust it.	1
I subscribed for one month only and it says I am still active, it continues taking money from me, and I have no way to unsubscribe. They are thieves, plain and simple.	1
After using this for six years or so, it's improved a bit but still it's not reliable. Lately I open the app and it says I have no tasks (I have dozens). But I still like the basic idea, which continues to be the only way I can make myself keep a functional to do list.	3
Perfect app for tasks manager, habits and other things. The people on this app are very friendly and can help you. This app really changed me. Thank you 🙇	5
It's helpful but most of the stuff, you have to claim it with gems and it drives me away from the app itself. Please give more benefits for non-subscriber users.	2
This is a cool and fun way to be productive and make friends with the same mindset!	5
What I find lacking from this habit tracking app is that it doesn't show you when you completed/skipped a habit (both dailies and habits). Most habit tracking apps show you your stats on a calendar, which is very important for me because it helps me track my progress. It also doesn't allow you to skip a daily at least once.	3
I would like to be able to share goals and progress with my son. It would be nice if we could use the same account as the goals we are working on are his. Is this an option or something you can add?	3
A blast and life-changing for an ADHD adult like me. Dopamine all day and stuff getting done that matters!	5
It's on the basic side visually, but it seems to be community-made so I don't hold that against it -- it's fun, and it'll keep you a little more interested in your own chores. Probably more engaging if you're more social than me, too!	4
just simply Wonderful	4
This is a great way for people of all ages to have fun doing tasks. There is chat,parties, and guilds. I have SO much fun. You can customize your avatar and hatch pets. You can even turn people into flowers with the “Shiny Seed”. DOWNLOAD NOW OR YOU'LL MISS OUT!😍	5
IT'S SO BAD I CAN'T EVEN LOGIN OR SIGN UP WHY😐😐😐😐😐😐😐	1
I really like the objetive of the habit game, it's motivating and I can't use it well because it makes my habits disappear and then they just back later, I would like to use well, after it I really love the Parties and the Groups that we can create or join.	3
Add a option to see my previous tasks which I have completed!! I think this should be added!!! if you at this I will rate you 5 star... Waiting to hear from devs😃	4
Awesome	5
This app is helpful and fun but the privacy policy is TERRIBLE. Once you start using this app, assume it is collecting everything you do on your phone (not just within this specific app) and selling it. I understand that you need to make money, but you should at least give people the option to pay money for the app instead of paying with their privacy. Also it's exceptionally invasive to use cook…	2
Great app but it's not letting me login after the update. I haven't been able checked my tasks for a week.	5
This app does great things for depression	5
Why does it not allow me to delete guild habits. Why?	4
Buggy lately	2
Amazing but now I'm addicted to being productive.	5
Significant lag with interface refreshing, and it often requires me to force-close the app so that my habits and dailies populate. Beyond that, I think the app is an interesting motivation strategy.	3
Fun, Free, and most importantly open source.	5
Time waster. Carefully set up all my dailies and habits and then the next time I opened the app they'd all disappeared.	1
I like it, I really do. But it keeps resetting so that I can't see my progress. A habit will go from +3/-1 to 0/0. It's a bit annoying. I got this so I could show myself that I'm succeeding more often than failing, but it's annoying to have it constantly reset. I found myself a little fix, where I screenshot it every time, but that messes with my leveling up. I want to gain points by completing t…	3
This app is amazing🤩🤩🤩🤩	5
Good app	5
Super helpful for building positive habits for people like me who are forgetful but are easily motivated by small goals and rewards. I like that I can make my tasks and to do lists into widgets for my home screen	5
Good concept ruined by a clumsy interface and irritating design	2
Quite a fun way to build good habits especially when part of a party!	4
Excelente	5
Edit: 5 stars after latest fixes.	5
Has become much buggier lately and keeps failing to save (and in some cases later undoes) edits that I make to to-dos. Will uninstall and use just the desktop until the next update.	3
Glitchy. I'll often open the app to find it blank. Later, I'll go back and my information will be visible again.	2
Nearly flawless. Graphical issues were solved at it now looks cleaner The only thing i don't like is reload content issue. I usually need to wait several minutes untill the app finally syncs account info :/ i hope you can solve this	4
Hi, may I suggest a blockapp feature? I find the blocksite feature in the app extension on Chrome really helpful. Thank you so much!	4
Hello! This is one of the most helpful habit building apps I've come across. I just wish you would be able to update your progress even without internet, and at least add a "yearly" time frame to the habit reset streak timer for those who are aiming to keep track of their progress for more than a month. Another suggestion is to outright enable us to choose "no reset" on the streak. Thanks!	3
Habitica has really helped make my to-do list fun!	5
The app has truly been a miracle in my life in terms of life quality improvements. However, I have been experiencing troubles with bugs in the app itself. For example, when I try to switch classes, it would load for an hour only to bring me back to the class that I was originally in. This to me is frustrating. Developers, please fix this bug.	4
Logged into my own account after getting locked out and accidently creating several accounts as I choose log in with Google and it just creates an account without warning which will now have tk be deleted all it had to do was notify that I have no account with that Gmail and would ha e been fine then when I finally got to my account I selected connect FB account and it kicked me out and created a…	1
This app should not be free! It's super fun, easy to navigate, can be used with a browser (with extensions!!!), It's cute and motivating. I love the party option and I think the premium version would be amazing for a small workplace and could improve team building. I highly recommend.	5
Finding app useful but I've only had the app a few days and it is already deducting for WEEKLY tasks not completed EACH DAY. Also running into issues where pressing a button to complete a task is unresponsive.	3
The UI is unintuitive and the game guide is terrible. I finally hit level 10, clicked select class on the pop-up and it vanished. There's no other place in the app to select class so I'm super bummed. The stats page has stats to select but not class and it doesn't even indicate what class you are. I'd give this app 4 stars if it wasn't for this.	2
Truly great 6/5	5
This app was the best thing that came my way this year, im glad I found it again after 3 years of looking for it, its a breath of fresh air all along the day while doing what I have to do. Great app, great community, great developers.	5
This app is awesome!!! It makes tasks fun to complete.	5
Absolutely love Habitica! Have been using a few years now, I know the team behind it is small but love to see calendar integration and possibly a wearOS compatible version someday but it's a great app with a great community behind it! :)	5
Reminds me of the Webcomic Trope I keep coming across, Power of "The Gamer". Helps me focus and complete tasks (neurodivergent, smi.)	5
This app is amazing totally changed my life	5
Habitica has been essential to keeping me sane as of late	5
Obviously designed by people who know truly know RPG games and RPG players! Love this app. Honestly. It helps me and my ADHD brain so much with our daily lives. A few glitches could be fixed, such as when I delete expired challenges, the links for other expired challenges don't work. Smoother functions could be nice, like when clicking on a notification saying someond had mentioned you, take us t…	5
I've been using Habitica for a few years now and this is the app that keeps me motivated to stay on top of my habits. I've tried other apps but keep coming back to this one. I applaud you guys at Habitica, you are awesome!	5
I had tried so many habit/task apps, but I wouldn't ever remember to use them! With Habitica's game-like twist, I remember to check more often since I'm having fun at the same time (And my party members would kill me if I didn't check often lol)	5
I have ASD and I can't tell you how much this app has helped me. Out of all the organisational apps I've tried this is the only one that's stuck. Took me a couple of false starts to get my head around it but now with most of my close friends on it, we have a way of keeping each other motivated though out lockdown	5
100% would recommend, from an adult with ADHD it's been extremely helpful for helping me organize my life, tiny bugs that are fixed by restarting the app, and its great	5
Great way to have fun leveling up and defeating monsters whilst knocking out tasks. If you run into an issue with the app the Habitica team is quick to help! I've stayed on track with my goals thanks to this fun way of tracking.	5
Literally life changing for me!	5
Awesome app. Life gamified	5
Too much effort	2
Very Smart idea	5
I'm still trying to figure it out, but I like it so far! Update: I live in Australia, he app is definitely not on my timezone. At 8am it's showing that I checked off half of my tasks, then later in the day it will ask if I did "X" yesterday. Can't find how to fix it, all of the connects say it's automatic, it can't be handing, and that I'm a liar.	4
It's a helpful app, but really buggy. Often times I find I have to close and open the app to get inputs to register. Haven't been able to get quests to work either.	3
Great, but it needs date tracking with time trends and graphs	4
This app is the cat's pajamas.	5
Hey. The "Set dailies Default to 'due' tab" option does not work. It always defaults to all no matter if the option is turned on or off. Please fix it, thanks!	4
Totally life changing	5
I've used this app for a long long time. Even without the game mechanics, as a task list and habit builder, it is unparalleled. Add in tight communities and an infinite number of challenges to pick from, many many different play style and motivation schemes and you have an impressive tool for life. I like to use it to curb impulse spending. If I want to buy something, I put it on my rewards, and …	5
The app needs some tweaking, the UX isn't quite there yet, it's at a 70%. I don't like that when I click the notifications from group chats it doesn't open in those groups but leaves me at the daily tab when it launches. But overall I love this game, it helps me consciously and unconsciously live a healthy and productive life.	3
at first it was okay, but after i added some to do list and habits, it froze and i cant edit anything.	1
All's good. Just please fix the bugs. It hangs a lot and that's really irritating. I wish to use this app again.	4
The only issue I have with the app is that somehow the current day of my week changed four days ahead and I could not find a way to fix this.	4
The app is great, I wanted and app with repeating tasks and I knew about it when it was not named Habitica (I can't recall the name). Now I have repeating tasks and it keeps me motivated. The only problem I found with the app is a bug where I need to restart de app for tasks (or anything) to appear, it shows as I had none.	4
Great graphics. Great fun. Kinda empty though.	4
افتزاه نمیشه بازش کرد	1
Can't log in with google, can't register. Apparently I have an email associated but can't retrieve the password. I've lost any interest I had in using the app. It's not worth the effort. Devs, please don't ask me to email support. It's not worth the time tome, just fix your app.	1
This is an AMAZING app. I have been using it for a few weeks and it really has helped me improve my productivity. It gave me the motivation to finish all my work on time. The tutorials are a bit hard to understand but you can figure most of it out. The developers are awesome, and helpful as well as the community. Overall, an extremely useful and fun app.	5
Really great way to keep track of routines - but the latest update makes my tasks disappear. I can usually get them back by closing and restarting the app, but it's been pretty frusturating. Otherwise, its fantastic!	3
Great concept poor execution	1
It has a lot of great features! I love the fact that it has an acutal character for you to develop alongside you and quests, it would be cool if they made it a little pixel idle game. However, I wish it did have a changeable widget theme so I could make it match my background and unlike RPG To do List after checking off your to do list it doesn't show a little pop up and give you a fun triumph no…	5
Like it says, it helps makes your tasks into a game. You have to buy your time on the screen with the gold you earn.	5
As another user mentioned I am also stuck on the login screen. I registered and when I type in the username and password nothing happens.	1
It won't let me log in wither with Facebook, Google, or making an account.	3
lol I'm not signing up to use an app	1
Love it. One thing I would recommend adding are completion sounds when you tick something off. No better feeling!	5
Can't Register at all	1
Love app but I have a suggestion: I have a separate app where I keep track of various projects because I can't on habitica so I would love that on here with widget functionality as well. That way I could list all my projects like "essay" or "design cover image" and then add 1-100% progress. Maybe with a big xp-boost upon completion. Otherwise, I'm very happy with it.	5
The concept is super cool and It's executed very well. I love playing It's really helped me keep on track with homework, working out, and playing guitar. I love the challenges and that people can set up external discord servers from their challenges. The whole game is just really cool.	5
Like the desktop version and concept. But the app is just broken. Everyday when I load it up all my TODOs, Habits, etc. show up as empty and I have to close and re-open the app to see them. This is just a critical issue that ruins the whole experience.	2
It helps me to do task. Loved it	5
I have gotten so much done since I installed this app. The reminder and the gentle incentives have been super helpful for me: as one example, I have flossed my teeth every single day since I installed this 6 months ago, vs. the few times per year I bothered previously. I feel healthier and more satisfied with life, because it's easy for me to see how I am progressing with the goals I give myself.	5
Been using this app for years to gamify my habits, and has worked great for the most part. But it seems the latest update is causing my tasks and habits to disappear. I found that closing the app and reopening it brings them back, as long as you haven't tried to add any new tasks.	3
Cant login	1
Not easy to maneuver but I like the challenge of learning it.	4
I joined so I could do challenges with a couple of friends. However, after getting invited to the party, i can't seem to find Party Challenges anywhere. I had to use the browser version to join it...	2
Great concept for an app! It's my default todo list and habit tracker. The UI is sometimes glitchy and it doesn't refresh automatically on my device ( one plus 8T) after spending items. It works as intended on the server side, the client doesn't update the server response unless I relog.	3
Can't even log in? Nothing happens...	1
Didn't work	1
A life changing app that has helped me through some tough times, but right now my tasks are disappearing, and only reappearing when I log out and log back in. I may need to find another app if this problem isn't fixed.	3
I pressed check button but my daily dose not checked :/	1
This is so awesome	5
I cant even register to start using it... android app is buggy as hell...please fix it soon	1
Make it fair pls, don't put buy gems option, I think it's outdated. Just charge monthly subscription.	3
I can't log in you guys I just registered	1
My initial review was very low because I got stuck at the login screen when I first got the game. Since then, I've been able to sign up and play for a little while. I love this game. The widgets that I can put on my home screen allow me to quickly mark off my dailies and watch my xp and gold grow. Its also kinda fun to learn what the pets like to be fed, but the base game is fun enough alone.	4
This app is great! I've been using it for like a year now. First: the bosses are fun. I love the stories. It's a great way to motivate me to do my tasks. Amd, I love my little pet dragon:3 The dalies, to-dos, and habits are so helpful! I recommend this app to someone who needs a way to spice up their daily tasks with a little something fun and imaginitive!	5
effective! I've had an insanely hard time focusing on schoolwork, but this app helped a lot. it's just that little amount of motivation that really does wonders :)	5
Really great idea an app for helping with Executive Dysfunction and similar issues. Only issue is its occasionally a bit buggy, especially with feeding pets sometimes just not working right.	4
Great for ADHD - it really helped me organize my tasks and gave me motivation to finish them. Unfortunately it's very unforgiving if you fail your tasks. If you hit zero health the game says you'll lose your progress on your current level but neglects to mention that it also takes all your gold and deletes one of your items. That was enough to get me to quit the app altogether since losing limite…	3
I've tried a lot of goal-setting/to-do list apps and this one, in my experience, is the best. It makes getting things done fun by rewarding you with experience points, gold, and other prizes. It's also easy to use and log different tasks or habits.	5
Habitica is an app that helps you create habits and stay motivated with a gamified UI. It is amazing. The community is really supportive. The app is free without ads (please consider supporting them). The whole project is open source. Syncs with the browser version. Just download it and give it a try.	5
Great app and idea. I had some questions/suggestions: 1) How to use quest scrolls? 2) Please add a calendar section. This can help keep tabs on meetings and deadlines in a visual way which is much easier. 3) Can the color of a task be tied to the difficulty? It seems that those two arent related. 4) I just updated to a new version, the older one had the character portion of the screen with a prup…	4
The Game and Website is great but the Android App has a lot of small glitches, bigger bugs and sometimes synchronization issues. Could use some work. (I wouldn't be subscriber if it weren't for the website-version.)	3
This app is incredible! It really motivates me to get things done and helps keep me on track. I like the fantasy RPG aspect of it a lot. My only criticism is that you have to use gems to change your class; I selected mage but pretty much immediately realized that I'd already invested a bunch of money into warrior gear and that I'd be better off just going with warrior, but since it's pretty hard …	4
I would have rated 5 stars but the progression in the game is just really slow and the rpg is not very fun. There isn't a lot of equipment and you will only ever use the 4 legendaries after unlocking them, all other being just cosmetic. Pets and mounts are also cosmetic. And even with an all int mage, it took me several days to level up unless I spent all my mana on xp giving skills making other …	3
I was hoping for an app that would help me hold myself accountable. This comes close, but doesn't quite cut it.	3
This app helped me so much, using it for the past 2 years. Still hooked and using it to manage my busy life.	5
Personally I found it Very Useful.	5
Makes habits fun	5
Great in theory, but so very broken in execution (coding). Dropped quest scrolls (dust bunny as example) have a bizarre gem-only "can't buy that" message, and I can't invite a party to start it, there's only clos available. App is still useful, however levelling up takes a lot of time; level 10 changes that a bit. It keeps me on top of my cleaning, which I need. Looking at joining guilds, many ar…	3
Several problems mostly that that most store items are behind a pay for gems wall(zero incentive to keep grinding) But I had forgotten to check in yesterday even though I did my tasks it just deleted them from my list without asking I could see payment of a membership but gems is a greedy cheap way to run the store sad could have been a great app.	2
I love Habitica! I am subscribed and backed the pin kickstarter too. I love games where you collect things, so I collect the pets, outfits, and hatching potions through completing my tasks. I also am motivated to do my tasks by the threat that my party might die if I miss too many. I am also extremely happy that there is a way to get almost all of the limited items you missed out on!! My only wis…	5
Can get a bit time consuming but hey, way better than just playing games. Try it!	5
It's very user-frendly and easy to onboard, unlike many other "rpg your life"-apps. BUT, it needs internet for everything; can't even tick off dailies as 'done' without connection :-/ Can't find a way to automatically re-order one-off tasks list (to-do's section) in any way tho. Smth like alphabetical, by creation date, by due date, undated first, high priority tasks first (marked with a star ico…	3
Enjoyed my time using thzis app. Made doing tasks fun, esp with friends. Plenty of cool hear to get too.	5
Fun and enjoy doing this with my family.	5
So cool. Takes a bit of time to get use to is all.	5
Perfect! This combines my gaming addiction with my thirst for self-improvement	5
Great game for couples You can create rewards for eachother to buy with daily chores they complete etc. Helps us stay diligent with forming new habits	5
Its okay. There wasn't much there to keep me invested. I just didn't open the app for days and I didn't lose health at all. The lack of consequences really hindered me.	3
Awesome app, more customization needed!	5
A good, fun way to add a little adventure to your everyday life. Just don't try and cheat - keep yourself accountable.	5
Would like to see daily reminders for to-do's	4
Its a good app and a good consept, but my dailies didint refreshed and i had problems with that. They also banned me and didint told me why. Im still trying to understand why they did that. And i also struggled to login a lot of times.	2
Really love this app, love the interface and userbility. Would love to see an option to colour coordinate different habits based on tags, and also more adjustable widgets. the to do/daily widgets are quite large :)	4
Awesome app, recommended	5
hey, amazing app :) tiny suggestion, add the option for a specific set of days under "dailies" - as in show a calendar screen so I can mark exactly what dates the task pops up. Would be extremely useful for variable class schedules etc. also, a place within the app for notes would be cool!	5
this app is honestly amazing. not only does it genuinely motivate me to do my tasks and stop my habits with the threat of harming my in game character, it also gives me instant rewards which my adhd mind loves! the graphics are amazing, the community guilds are so inspiring and the concept of doing it with your friends and having rewards/consequences is extremely motivating! couldn't reccomend a …	5
It is interesting, but the app seems a little broken. The menu is not the most user friendly to navigate and the option to "go on quests" did not work for me. Maybe it was just mine, but for the most part it was ok.	4
Honestly one of the best productivity apps I have ever tried. Very impressive considering how the community started and what their current team is like. Definitely recommend it wholeheartedly. They've got very very minor bugs that they're actively working on, amazing challenges, can coordinate with calendar if you want, has a community organized in guilds, and has a customizable avatar in RPG-sty…	5
Really way of doing chores haha! Could use some mucis though.	5
Wow I'm still trying to adapt to the app but it amaze me how much it contains and all those different features	5
Perfectly made 😍 Insanely useful.	5
I struggle to do every day things that I used to take for granted. This app has helped me progress towards doing simple things again. It's so much fun!	5
This app has been so helpful for me in the past couple of days.. I find myself doing the things I need to that I never do, and even looking for more tasks I can do so I can earn points. I meditated for the first time in ages and remembered how much it helped me. I've also been using it to be kinder to myself and give myself credit. And when I drink soda, my first thought is where's my water so I …	5
It's an amazing app. You can check off tasks without even doing them and you still get experience and rewards. I can't wait for all my progress to come to light with a single click of a button.	5
Its good	4
I can't really fault the app itself. Would recommend as a free app. My problem is with the price of the subscription. It is VERY expensive. The price is unfortunately the deal breaker here.	3
Habitica helps me become productive!	5
The most productive Ive been in my life was with the help of this app	5
Gotta love the idea!	5
I love the app I do wish there was a way to log goals.	4
Makes you steady if you take rpg seriously.	5
Really loved this idea of putting things in a fun to do activity format	5
I really enjoy the app to compliment the website. It isn't as user friendly, though, so I prefer the site. The tasks glitch and don't stay in the correct order. I would like to see the "party" tab at the top with "tasks". I also like how on the web it let's you try on the equipment before putting it on.	4
Amazing i am already on lv 6	5
I can not to register. There is not any error message or any thing else	1
Would love to have support for tablet UI, right now it's just streched mobile version of the UI.	4
Impossible to Progress	1
Really helps me stay organized	5
Sensacional em tudo o que se propõe	5
I liked the app because it motivates me to do task on a daily basis but its too buggy. Please fix this	3
Effect to do list	5
Habitica has made me more productive and mindful. It has literally changed my life. Period.	5
I'm a huge fan of Habitica, but the Android app is unpleasant to use. Extremely slow.	2
Great app ! but please think about adding a feature that allows to add numerical value to habits , like how much i (ran, read, studied...)	4
So, I thought I left a 1-star back when they updated the GUI for this app. Apparently I didn't. The new interface is insufferable and inefficient. It barely functions any more and I only struggle with using the terrible app because I have a few years of subscription stored up I don't want to waste. Don't bother with the app if you want something that works and runs well and doesn't look like a ho…	1
I gate reminders 2 to 3 minutes late than the set time overall I love the app 😎	4
I use it for over two years and I love it. the community is great and devs have good values. there's no forcing me to buy something to unlock features (only some visual skins so it's more a donation for me I'm happy to make). it's also fun if you want to do it solo and there's so much stuff to use for your needs. pixel art is pretty and it's very handy to use. I like both mobile and desktop for m…	5
4 stars coz the feature to default to the due tab in dailies is not working on my phone. It used to work earlier	4
Very limited character creator. There is not even an option for long hair. I get locking customization options behind a pay wall, but not offering the most basic options is unacceptable. UI is cluttered and frustrating to use. Tutorial and examples do a very poor job of explaining what each section is. I had to rely on 3rd parties and half the people I spoke to were also confused and gave up usin…	1
The idea behind the app is incredibly unique and exciting, and the retro graphics tap into the old-school cool factor. However, the "game" part is way too complicated because there are hundreds of parts and animals and food and potions and clothing and quests, and none of it is actually explained nor is there a clear path to follow. Because of that, it was off-putting so I tried for a week and de…	3
Llevo 19 días cumpliendo mis habitos, algo que jamás había logrado por más de 3 días. He disfrutado el proceso gracias a la app. La recomiendo mucho	5
Awesome, but my mom says I can't use it anymore :(	5
This is such a cute way to improve productivity! Love it!	5
Just starting out, having high hopes	5
I should give it 5 stars but the only problem is that i need to be online to use this app which is Annoying me ALOT Because i want to stay offline when getting things done so i don't recieve messages or notifications and get distracted I wish if i can use it offline it will be amazing :(	4
A fantastic app that has aided motivating myself, increasing my productivity and getting organised. A must have for people with ADHD. My only suggestion to the awesome devs is: is there a way to make task completion availsble offline please?	5
It really helps me stay on top of my tasks in a fun way.	5
I really love the app, it's helped so much with my procrastination, especially on big projects. It's helping me to be more mindful about some bad habits and gradually making them weaker as well! However, I think that it's kinda annoying that some of my challenge related tasks turn bright red for not doing them... They're the feedback type that's due at the end of the month, so yes, I can't do the…	5
I hope it works	5
It helps my immersion since I always wanted to exploit my unexplainable productivity when playing games. Keep it up!	5
Just got it but I love the idea, it has already motivated me tons! Definatly get this app.	5
Easy to use, I liked it but I need an app to keep track of what I have accomplished and what tasks get neglected.	3
Nice selection of options to stay on track of my goals. Very inspiring	5
Love it!	5
This app it's amazing.	4
Fantastically done.	5
Good	5
No ads popping up. It's free. I enjoy the community encouragement and tips. It's rewarding. Easy to use and edit. Has all I need in one place. Recommended.	5
Updates are lame (mostly cosmetic) and no significant upgrades ever done. App is often buggy.	2
Cool app.	5
Great app really helps you build good habits	5
this app is good. one feature request i want to see count of all the tasks i have completed, fron start.	5
This is such a great idea. I am a teacher and I was looking for ways to motivate my students. I didn't expect to love this for myself. My husband and I are working on household and self care goals and having fun. It's amazing!	5
Requires registering etc.	1
I like it at first but the game and communities are a bit complicated for me. I just wanted a simple habit tracker. I can't even figure out how to check off from checklists. It did motivate me but well, this just doesn't suit me unlike others. Thanks for the experience though!	3
Advertisements in push notifications.	1
Pretty much immediately felt overwhelmed and anxious upon getting everything set up, so I wouldn't recommend this for people with severe anxiety. It places so much pressure on the player at once. It's just overbearing and I couldn't even keep the app for a day.	2
I always come back to this game, so fun	5
Transferred my progress from Loop Habit Tracker for the community. I wish it wouldn't require internet connection to check off Dailies though.	5
Cool	5
Didn't use it for main gimmick, the rpg stuff, just some task and habits. It works fine, but there are pop ups almost everyday informing about stuff I don't care about and I don't know how to turn it off.	4
I really like this app, however, could use a tweak: After the day is done, I want to see what's completed. It would be great if there were a timeline page which keeps score of all the completed tasks in a scroll down bar organised day by day. Sometimes I accidently click a task, it would be good to be able retrieve it and restore it from this logbook as well.	4
Amazing app. But stoped using it since I have a bad Internet connection. Really think that most of the app could be offline.	4
I hate the gem system. I absolutely love the app and I've had a generally positive experience. I really think it's one of a kind and gamifying activities is the future. I've been playing for a while and I'm at a pretty high level now, but I can't help to notice that there isn't much left to do at the point that I am. Sure I can level up to infinity. Sure I can talk to people. But there is a lot o…	4
Very easy and fun to use helps me get things done	5
Amazing app. Just wished you could set to do as the main page vs habits	5
Excellent habit tracking app. I give a 4 because unfortunately the app is super glitchy.	4
Very nice to manage and rewarding	5
Absolutely amazing changed my life. Just one suggestion add something where you can have a habit to go on the app and reward people for logging in because this is amazing but I need to remember to log in to tick stuff which I often forget to do but either way amazing app.	5
Seems a bit pointless that you cant set any goals...	2
Positive: as a habit tracker, it's well organized, easy to use, colorful to the point of being kitschy. Negative: the community is woke, hostile, and intolerant to the point of self-parody. What can you say about a site whose moderators claim that speaking a gendered language ( i.e., Spanish) is a hate crime because gendered languages discriminate against trans people?	1
Gamified Personal Development. A well thought out app.	5
This app help you put your life together Happy new year to all devs	5
I have been struggling with organization and productivity lately, and this app is the answer to my prayers. I love RPGs, so the layout of this app helps me stay motivated to complete my tasks and stick with my habits. I love the organization of the app, letting me divide things into habits, daily, and To-Dos.	5
Turned my life around for the better! Thank you 😄	5
perfect for managing my schedule, motivate me a lot!	5
The game features make the app really fun, but even though I set reminders for my tasks, the app doesn't notify me. It's useless to me without working reminders. I will have to go back to my old habit-tracking app.	2
issues it won't let me install the app on my phone for me to use my account because my husband has it on his phone	2
This app gave me a currency for letting me sleep,this made me be productive and not even in a bad way I like the fact how u can reward yourself for working or doing stuff. Really helpfull with time management . 10 out of 10 recemonded	5
why there's no Arabic language sorry for the low stars it's cause I'm disappointed 😔	2
I really love this app! Overall I've found it really helpful and it kept me motivated to do tasks I needed to do. When it was working though, I wish there had been more options for customizing the avatar,l. Overall I'll miss this app since it doesn't like my phone anymore. Edit: I am no longer using a 5 year old phone and it works perfectly now! I'd still like new hair styles but other than that …	4
Great community, positive impact.	5
It has everything I wanted but it cannot run offline. It would be much much better to run offline and sync only when we run our data	3
This is an awesome way for me to keep the procrastinatior away :)	5
Some bugs such as not being able to edit your tasks etc without the app crashing and restarting. Other than that, it's made life more enjoyable for me, especially in regards to living sober without being ultra bored.	5
This is an amazing app - not just for the app itself, but the huge community behind it. There are so many people involved in this, both the developers of the app, as well as the user community that steps in to help. One of the best examples of the loving support is that even after I stopped being a paid customer, they took the time to help address and fix an issue I was having with my account. Th…	5
Really full-featured and continually-supported app. I just need to stick to it. I dropped it for a few months after I got a new phone and hesitated to download it again, largely because I wanted an app that had a dark mode and this never had that. But I decided to re-download it anyway, and it does indeed have a dark mode now. I would suggest the developer add new pictures on the Play Store to ac…	5
I've been using this app for over a year. It's a fun way to organise the things you want to do, and get them done. Gamifying tasks has been most fun with this app, compared to anything else I could find out there. You can group up with friends as well to defeat larger quests together. Definitely worth a try at the least. My biggest recommendation is to take a bit of time when you start out to rea…	5
Such a fun way to work on goals / habits, play, and connect with friends. I've used it off and on for years, but for about a year and a half as of my most current. I love this app so much! I recommend it to anyone who likes to work on themselves and has an appreciation for rpgs.	5
It's my first time using this app. It's a good app especially for maintaining a good habit or regulating a bad one. Especially foe a gamer like me. I'm kinda disappointed that it still doesn't have an hourly option for a task. And I do hope you include a notification for it. Looking forward for a respond. Already posted a suggestion in your website. Might change my rating incase you include my re…	3
Good well made app and game like features make it fun however I think I got too distracted by the features that I started to lie about my habits so I could get new armor, costumes etc.	4
Can't set dailies to default tab. I have no habits so why do I have to see this screen everytime I open the app.	2
Love this app! I only wish I could use it offline and it'd sync when I get back online because we'll, not all of us want to be online all the time!	4
I like this app. It helps. But there's one thing I hope it could improve: every time when I go to the "dailies" page, I have to re-choose "show the due tasks" to see what haven't been done. Why it can't remember my choice? I always just want to see what haven't been done yet, cuz I have a lot of items on that page.	4
Accidentally pasted over my original comment which said "I love Habitica, only wished they would be more consistent in their options and naming conventions between the desktop and app versions". Habitica responded: HabitRPG, Inc.December 23, 2020 Hi AFK, thanks for your review! If you'd like to share any further feedback, please feel free to reach out via Menu - About - Send Feedback. Me: Yes, I'…	4
Great organizing and habit building/breaking app also good against procrastination. Can make chores into a literal game. Still a bit buggy but ultimately enjoyable.	4
Says dailies, by default is weekly. No select multiple to edit/delete.	4
One of the few actually useful notepad/to do list apps I've found.	4
The concept is good, but the execution is extremely poor and buggy.	3
Great app! Finally something that motivates me. And you don't have to pay to use it :) One comment: I wish dragging and dropping tasks used the same solution as dragging and dropping items in a checklist. The way it is now makes it work inconsistently, because sometimes the interface thinks I want to scroll through the list and not move items around; because of this, it can be quite frustrating, …	5
I've used this app for the purpose of tracking some of my daily activities for years, and I've always liked it. Lately, though, the app has been completely unusable, it stops working as soon as I start it up.	4
After the update , app is not even opening on my android phone... plz fix it brother... im planning to take subscription but im disheartened by this... btw loved ur work	1
It really helps me become a better version of myself.	5
GREAT I feel like I'm living LOTR😅 it's a great app that helps U achieve your goals by gamification	5
i did not expect this to be as fun as it is. if you like to get things done but also like games and have a need for gold stars, GET THIS APP. i love it. Update 2020-12-20 selling does not decrease the number of an item immediately. Please fix that. :)	5
Loved the concept of gamifying your life. Unfortunately, the app crashed and I cannot get it back to work. Quite disappointing	3
Great community! I downloaded this app a while ago becuase I was in a rut. Once you find a group you click with it's great!!	5
Been using it for months, but this app has changed my life. Giving it 4 stars because the feature isn't as rich as the web version, like the ability to see another account's photos, see more challenges at guilds or party... and also, when I open the app from the notification bar, it crashed, but it won't make me take another star. I already love this app since I started using it. Thank you so muc…	4
Literally cannot open the app anymore, it's a good app but that doesn't really matter since i can't open it since the most recent update	3
It just doesnt work. Stupid if you have an lg-5 or 6	1
Hey can I get a new update in which the app keeps a track or record of our finished daily and to do list. 1. so we can see since we wrote the to do list and when we completed it. 2. We can also see when did we miss our daily tasks and till when did we followed it maticulasly. 3.Please make these changes in the free version only, I request you.	3
I like the aesthetics, but it would be more convenient if I can default the to-do to scheduled rather than active. But also it's a good thing this app has a website version too.	5
Do this app can work with fitness tracker ....	5
Helped me a loooot.	5
Great app, but synchronization issues makes it unusable. Can't check tasks done.	3
Really happy with this, usually apps like this don't bring me joy to use but this one is cool. It could certainly use more features like better backgrounds and perhaps even things like character missions, etc and more importantly a more colourful update to it, it's a tad bland in comparison to other apps but that's only a small issue	4
My Favorite To-Do app-- brilliant features like Dailies and Habits that I haven't seen in any other app. I like the gamification, though I know a lot of people don't. I imagine I would still use it, just without joining a party, and ignoring the gaming aspects, for these particular features, if I were in that situation. Update: I've been using Habitica for over 3 years. It's still one of the most…	5
Please add the option to create new tasks,habits & to-dos when offline.Everything else is good.	4
Very useful, I surprisingly found myself grinding in real life in order to get my self just a few more gold for an item. I just wish there were easier ways to get gems and other items for free to play members.	4
Awesome! I've become way more organized after starting to use this app. It has also saved me many times by allowing me to keep track of all my tasks and assignments by scheduling them. Absolutely loved it. Keep up the hard work dev.	5
It's really complicated, so I didn't want to give it 4 stars but that's only cos I'm not an rping person. I would've given it three stars but well, I like the important parts, found an easier app to help me tho 😁	4
My best application, now download so funny and useful :)	5
Awesome app for making good habits and boosting productivity. Please introduce more quests.	5
Best app game I've ever played and it betters my life in small ways. It's all about building small automatic mindset and habits changes.	5
Great!	5
Love it...thanks to developers	5
Very good overall but I'd still like to see some improvements. It would be nice if you could get notifications for 5000+ member guilds, I wish you could more easily sort through challenges and leave ones that have ended (and delete tasks from expired challenges), and have the app automatically delete to-dos once you've completed them so you don't see old completed ones in the task list. Having mo…	5
really really helps my focus on assignments! as someone with adhd this app helps a lot	5
This app is a gift to us all. Those who aren't making use of it are missing out.	5
I give this app 4 stars. It is a decent app of its type the only thing I can say I am a little disappointed in is you have no skills that you can level up. Oh there are stats but from what I can see you dictate where the points go so you can effectively increase a stat that has nothing to do with the job you've done. That said it has some pretty cool features and a very friendly chatroom which no…	4
I am an adult with ADHD and this makes a HUGE difference in my life.	5
It crashes on OnePlus 6T while trying to create a challenge	5
fckng awesome	5
Always needs a manual refresh for true info.	4
Its a good app aesthetic-wise and for gamers and enthusiasts who wish to get things done but there's not much to it. You get stats but not really a proper record.	3
Great app and service! The user base is amazing and the staff is awesome. Reminders don't work for me. The redesign looks really nice!	4
How can i refill my avatars health?	5
Great app for encouraging good habits and making a note of tasks. Works well for us.	5
Very cool	5
Great app, great concept. But sometimes it literally just... Doesn't work. I tap tasks and it goes 'ding' but nothing happens. I tap to clear messages but they don't go anywhere. I tap my habits and they don't go up or down, so I don't get the reward...Not sure why this is the case.	3
So far I am enjoying this app.. it's my first day and still figuring it all out but I am excited! Keep up the good work!	5
I helped me get motivated to do a lot of things of my "eternal to-do list". It's fun and easy to use.	5
I loved the app and it's concept. If I really needed a habit/task tracker or something of that sort. I would have loved to have this. I have no idea if it works offline, it would be better if it did. Unfortunately, I don't need an app like this now, so I am uninstalling, but I would love to come back one day.	5
This app is great and really helps me manage my life. One thing I would love to see is being able to color code my task, dailies, and habits. Say for example challenge tasks could be different than others.	5
Edit: First of all thank you for taking the time to reply to my review, that is well appreciated for us end users. I cannot wait for the offline capability of the application to be implemented, I hope for that update to come as soon as possible. I will try to send my feedback. Thank you for your hard work, keep it up. God bless all of you devs	5
A very great idea. I loved it. It's just not for me tho :/. Like I don't feel motivated enough to keep using this app. But the idea behind this is really great. It has items, pets, etc. Just everything you would normally find in an RPG. Just isn't for me tho I rlly wish it was. I would suggest others to try it out it really may help others more than it did to me. 👍	4
Really well designed for what I need, a To-Do List, Habits...and the RPG format is cool. Haven't explored fighting monsters but you get EXP and loose and gain health...pretty darn genius.	5
It's very motivating but it is a little bit buggy. Besides that, it's helped me a TON. I work put daily, keep up with personal hygiene and am in general just happier and more organized because of this app. Highly recommend	5
I like it. It's interesting. Is it possible for an offline version?	5
Genuinely Great Experience	5
gets force closed after opening and the app launch screen	1
Life changing experience!	5
Functions fine I suppose, I liked the idea of it; just isn't my thing.	4
Honestly it really helps at least for me	5
This App makes my life funnier, and makes me feel inmerse and responsible with my journey.	5
This app is almost exactly what I'm looking for with one major exception. The daily task widget is unfortunately limited in how small it can go (2x2). I would like to use if for a single very important task which leads to a huge purple empty box taking up space on my home screen. If the widget was able to be shrunk (or even just make the purple box invisible) it would make the experience a lot be…	3
I downloaded and tried this app. Did I miss something? Because it seems like you have to go to the website to play an actual game. I doesn't look like you can play a game within the app itself. All it seems you can do in the app is the to do list and equuip your avitar. I don't have a laptop or desktop computer. All of the public libraries are closed. So I can't use theirs. So I lost interest ver…	1
This is what everyone should have. It is the ultimate game. But it has a lot of bugs. I can't delete tasks, I can't edit tasks that were premade by the app. 2-3 basic features are missing. I'll change the rating to 5 stars once it is fixed. No, I'll not contact your team or email them the problem. It is basic and you should just fix the goddamn app. Edit : I have updated it from 2 to 4 stars caus…	4
Love love♡ this	4
How do I undo an accidental activation of a habit?	3
Excellent App.. I honestly give this app the five stars. At first, When I couldn't understand this app... I didn't like it that much.. then gradually when I grasped the idea of parties, challenges eccetra I really enjoyed the way this app is created... plus please add 3d gaming characters and rewards and also voice chat feature.	5
Amazing idea. Would like to have monthly stats where I would be able to track which activities I finished on which days.	5
app like this was so great! organizing your task, to-do list, habits! plus a character like you, like if you didn't completed a task your character is like damaging, is like in actual life of how productive you are! but there's one thing that i don't like this app , is sometimes there's an bug like if you have another new task to type and you click save? it wasn't saving , it keeps running in a c…	4
Easy to use and a fun experience over all. However I notice that reminders are not working	4
It's fun. It manages to convince me to do daily tasks more easily. It's cute, the rewarding system is good to keep me coming back to my chores.	5
Poor UI. Not motivating	1
Was a nice experience, but lacks something I value at top level. A profile photo. There's no personal expression even if you were to unlock other accessories. It would be nice to have a profile photo in the place of avatar if the user chooses.	4
I bought 4 gems today. But still showing 0 gem. Please fix this problem.	1
Staying away from this	1
I just hate it	1
Awesome! I started to be more productive and the rewards like pets are so cute! It's a big help and I becoming a better person :)	5
Please add an alarm feature, its the only component i find missing	4
I've only just started using this app, but I already love it! It actually makes me want to do my chores so I can level up and earn stuff 🙃 Only minor bugbears so far are the American date notation and the reminder clock being an am/pm one. Wish I could change those to the usual settings we use here (dd/mm/yy and 24h clock). Especially the date is really confusing..	4
Reminder isn't working	3
So good, the only think is that you can't make a due date for your tasks and that's weird.	5
Mandatory login 🙁👎🏻	1
Oh boy, I think Grading this was about time. This app (service, including the web page) it's an AMAZING productivity framework. Habits / Dailies / To-Dos. I can't recommend it enough.	5
It was a great app until the latest update. The screencaps are deceptive: looks like the pets and mounts are larger, but on an s10+ they are so tiny you can't tell one colored blob from another. The sole reason I used Habitica has been ruined.	2
Just dont get this thing off the store	5
I mostly use the custom prize. I use this app like a to-do list, that gives me money to buy that custom prize I set. Habits and dailies sections are great too. Apparently, your character can fight bosses and monsters too. You can also invite your friends or join groups to slay bosses and monsters, level up and improve together. Though I don't have a plan on slaying and upgrading stats, hatching p…	5
I've basically only started so I can't say much, the art style is very cute and it so far seems very easy to navigate, but unfortunately during character customisation I encountered a bug where I could look at all the options and randomise my character, but choosing any of the actual options was impossible, I'll update this reciew later when I have more experience with the app	3
Does a great job keeping me on track with what I need to get done in a day, without the hassle of scheduling each thing to a certain time slot. I just mark off when I've done it!	5
It's fun and helps motivate me to create good habits.	5
Bad	2
Hey i really like your app, it is unique and great, But why does mine doesn't have a due date set up, instead it is just a start date, could you please help me?	3
I feel happy this app exist, I only had it one day and it really helps with my habits.	5
Pretty interesting how the app works	5
Cant update or create tasks while offline	2
It's a great concept, but at some point, it'll either be a guilt trip or exploited, or both. The app can't truly tell whether or not tasks are completed, and I think it'd be easy to just create random tasks and mark them as complete without actually doing anything. I have nothing against pixelated art, but the poor pixel quality doesn't help. Again, I love the idea, but it'll need some refinement…	3
I am enjoying this app I think it is well made.	4
Just change the colour of delete/save button in dark theme and I'll recommend this app to everyone I know. Edit 1: They fixed it. Very happy that the devs are so active. I've recommended this app to many people. If you could somehow enable inviting people to parties through links then I'd invite even more friends (as sending a link on my group chat is way easier than emailing everyone individuall…	4
The app doesn't work, can't register or login, registered through the website, reinstalled the app and still nothing... Edit: Seems to be fixed, I like it so far!	4
Very good app. Helping me keep accountable after 3 days of use.	4
Android version isn't working for me but IOS one is running smoothly Edit: It is working better now, first the profile wasn't load nor syncing with my iPhone Habitica but now it seems to be working. I am glad that most necessary reminder stuff is free. Respect to devs for that. Hope the UI improves or at least becomes similar to the IOS version. Once again great work devs!	5
I love the way things are organized and it helps motivative me; however, the game has this annoying feature where every time you try to click something, you have to refresh. Sometimes tasks I've finished will disappear; sometimes they'll stay. I would hope this bug gets fixed! Other than that, a good app	3
I initially gave this a 1 star because it didnt work at all on the galaxy note 10 lite. After messaging the devs, they fixed the issue within a couple of days. Now the mobile app is as good as the desktop version. Thank you all so much for your amazing hard work. This app is changing my life. Highly recommend this app to anyone wanting to improve their life.	5
Deleting my previous review/questions. The app is the problem, the website version works great. Everything is updated on there, but my app shows nothing. Hopefully they are able to fix this so I dont have to open my laptop anytime I want to make changes or mark off a task	1
Interesting concept, but execution is awful. Achievements were not working on my phone, neither were the counters, the dailies, the notifications i recurved while in the app and it constantly asked me to refresh the session because it was out of date (refreshing never worked.) Hopefully the developers will spend some more time testing the app before future releases, but for now I'm uninstalling.	2
The app is amazing, its really helping me with my tasks and habits. I just think that it would be very nice if the app had a "history" for us to see our perfomance in the week and the month	5
God this whole thing was so messy. I could barely even make an account, and it kept telling me there was already an account with that email. Then once I finally got it to work, I tried to check something off, and it kept saying "Server outdated, resync or reload" or something similar. I did everything I could- force stop, remove all data, etc, nothing worked. I love the idea, but god it wasn't do…	1
Couldn't get any of the features to work, ui navigation felt sluggish and confusing, I like the idea but it just wasn't working on my device	1
Unable to register/login properly. When I register with google or just type my info then press the button nothing happens. If I then close the app and open again I seem to have an account, but it hasn't started me on a tutorial and I can't earn points from anything. Broken app is broken & should be fixed because it's a really cool idea.	1
Updated the app to include mana. I can now no longer see my avatar, my habits and dailies are gone and ticking off tasks doesn't work. The update has broken the app.	1
Hello dev.. I've been a user for about 4-5 months now.. And I mean to say as positive criticism that the UI kinda sucks man.. It looks way worse than the previous versions..	5
I cant even get the log in or register screens to work.	1
Not bad to remember what needs doing, but the RPG mechanics are useless unless you plan to invite friends, and I was disappointed to discover that I was forced to get obsolete gear after getting the seasonal gear.	2
Great at getting you motivated with the added bonus of finding support from your friends and other community's in a fun way	5
Gg	5
this has affected my life positively a lot! ive started actually living after downloading this app!! thanks to the dev!! :)	5
I signed up for account, it wouldnt log me in on the app but sent me an email and i was able to get in that way. Made a couple tasks, wouldnt let me go further. Then app finally let me create tasks, but every time i tried to "do" a task it said i was out of sync. Logged out of online and app. Tried to relog into app. It does the little spinny thing like its going to start then doesnt leave log in…	1
Wouldn't let me log in at all	1
Let's you make an account but can't actually log in or use the app just says it's loading then stops still on the username/password page... not good	1
I was very excited to try this but the app is a joke. There's no proper user flow or error handling- after registering I got no confirmation, I had to quit and open the app again so it would let me login. I added goals but they were in no way saved after reinstalling for troubleshooting. I can't check them as completed. No tutorial, no character loads like in the screenshots. It's not a network p…	1
Wonderful, fun and productive	5
Fantastic Habit Forming App! The staff is so kind and helpful. My reading skill and general cleanliness are castle improved. I love forming a party with friends and doing all the little quests together.	5
Great experience. This app has made me more productive and engaged! Love it	5
can't edit or change anything	2
I find it so hard fitting things in/remembering to do things, but this app makes it a breeze. Grateful to have it! 👏	5
I love Habitica so far, with the exception that no one is able to get my party invitations! It would also be great if party members could trade pets.	4
Made productivity really fun.	5
Best gamification app.	5
I love the layout, structure and simplicity of this app. But it has one critical failure There is no way to view stats except how many times you have done a thing. "Make the bed" 23 times. In what timeframe? A month? A year? What is the percentage of days it has been made/not made? The only thing I feel like I have to show for this is virtual items. If you would add satisfaction with good stats I…	3
Is not working in my device. I can't open it :(	2
The graphics are adorable, and the UI is clean. There were a few things that were a little confusing to find, but there's a wiki that answers a lot of questions as well as the FAQ. The only reason it doesn't work for me is because tasks feel more like currency than progression. Other task rpg apps either chart your progress or show it as a literal path, which feels more like moving forward. Cute …	4
Makes daily chores feel like a game. Habitica has this thing where you collect an extensive list of gears and animal companion when you complete tasks. I love collecting items, so choosing the rogue class out of the other 3 is probably the best choice for me. There's so much more to it too :)	5
It works, but it has issues... the thing is, compared to some other apps of it's kind, its not great. It could use some more customization, like custom items, and the tutorial is kinda annoying, especially with pre made tasks. But, it does what it says and well enough Edit: Thanks to the Habitica team for responding, some developers don't care, but it's good to know this app has a great community!	4
I REALLY LOVE THIS APP. REALLY MULTIFUNCTION AND REALLY GOOD!!	5
Nice app tp start a new habit!	5
Are you kidding? All the cool character customization items (which are very limited in the first place) cost real money. I thought the purpose of the app was to help people by motivating them with rewards, but there's absolutely nothing interesting you can buy for your character with the regular currency. What is the point then? Ridicilous. Put ads in it if anything, but not lock the very few ite…	1
Please add the option to view progress monthly / year / week	4
Great idea, great app	5
RACIST APP!!! Why the FFF don't you have my skin color?? So, I can be light blue and green but no caucasian? Oh right, nowadays we're supposed to be the villains of the world, isn't it!?	1
Worked extremely well for me with getting organized and gamifying everyday tasks. Has a really helpful community.	5
Previous issue was fixed by developers. Thanks for getting back in a timely manner. Great application and is a fun way to keep yourself motivated. Being a gamer myself it is a nice change of pace to your traditional tracking app.	5
Great app help helps me get stuff done compared to other so-called "Adult" " serious, not childish" app	5
New UI design is amazing! Only one mistake... when I edit a task, the save button is not showing but I can click that...look into it. Edit: Its fixed now already, Thank you :)	5
I love it :D I met great and fun people and this is the only to-do apps that really makes me do it or else I'll die oof. I love the concept and all but i kinda wish that there'll be more default costumes like the hair that is free, or some that can be bought by coins if possible. And maybe the background too? Anyways overall I love it, it was really effective for me. Keep up the good work, I'll l…	5
I love the concept a lot but the actual "gaming" aspect of it leaves a lot to be desired. If there was something we could do or level up to or actually fight. Maybe pokemon sort of format for the game. That would really make it better and keep someone interested	3
Recent update has so many bugs. Tasks and habits will be gone upon first opening the app. I have to restart the app every time I want to do something. Save and delete buttons are the same color as the banner or gone entirely. I love this game but I'm about to be done after this update. 🙁	1
What would I do without this? Seriously. I don't know. This has honestly helped me work out, and floss. How dumb is that? I don't want to disappoint my party, so I have a certain amount of reps and chores to take care of every day. And darn it, I do them. I have 100% seen improvement in my muscle-mass. It seems... So weird. But this game/whatever you want to call it has started to make me buffer.…	5
Overall a solid app, but there are some cash cow mechanisms.	3
Best app I've used to help me stick with habits. They change colors, ranging from deep red to light blue, to show the how well you are doing with the habit. The support features and articles help you customize the app in many ways to fit your needs.	5
This app is amazing! It's exactly what I need to keep track of my goals, cleaning tasks, and to-dos. The widgets were a game changer and allowed me to basically create my perfect bullet journal spread on my phone. And they already gameified it for me so I don't have to. Truly a blessing of an app.	5
Habitica has been a massive positive push in my life. I dont make alot of game reviews, but i kinda felt like i had to for this one. I have adhd and it mainly affects my executive function which gives me alot of issues with procrastinating and putting things off and letting things like my personal hygiene and im ashamed to admit this, but the care for my animals go. Having a place to manage all t…	5
This app has helped my family and I maintain a daily routine despite the emotional rollercoaster that has been 2020. Updates sometimes cause bugs but they're rather charming & are quickly corrected. Whether you're using this solo, with irl friends, or ones you make through the app, habitica will help!	5
I liked doing my tasks until they kicked me out for no reason😢. Why?	2
I wish it will be widget in next update Please	5
Used to love this app, but recently, it's become very buggy. I can no longer use the check boxes for Dailies or To-Do's. Please fix this app. UPDATE: Appears that whatever bug occurred has been fixed.	5
Dear Habitica, This app is currently impossible for me to use. There is no save OR delete button for editing habits. I checked your most recent reviews and a few others seem to have the same problem. Please, please, please fix this. I will say as well that the first opening of the game feels a little jarring. The editing of ones character feels clumsy and it is definitely not better to start with…	2
👎	1
Missing the integration with e.g.calendar u have to fill in too many forms and manage it all by yourself.	3
Great looks and concept. Has some important features for accountability that other apps don't. Task scheduling not as good as the competition. Tutorial needs to be more explanatory.	4
I love this app! The new dark mode is great. You guys fix any problems really fast and listen to the people who use Habitica which I appreciate. Cheers!	5
Ever since the latest update, it's too difficult to check off tasks. It keeps accidentally opening the task item for editing. So annoying!!	2
Just installed yesterday and have used it for a whole day. The app is very helpful is setting concrete habits to reinforce or discourage and comes in the familiar set up of a video game. I'd definitely recommend this to others who are trying to develop themselves. One minor issue is that in some dark app themes, the delete and save button can't be seen because the text and background have the sam…	4
Great app but I uninstalled it because I'm an offline user I wish if you can make it offline with all the functions.	2
I would LOVE to play this game if you added an aspect of battle against other real life characters, that would be motivating to get all the areas up and not just work on one area. :)	3
It won't let me set a username. Just says "username already taken" even if I type in a random string of letters/numbers	1
I'm trying to change the language but always stay in english...	2
There's no button or method for saving changes or deleting tasks, meaning I can't use this app at all	1
One of the most flexible productivity apps I have used. Works as a Habit tracker, daily reminder list, and a To-Do list, which is great if you want to have an overview of all these things inside a single app. Makes your tasks feel less overwhelming by keeping the theme light and fun. The devs add new content to it constantly and the community is able to create guilds and challenges, offering a mo…	5
It's a nice to do list app for me. Separating things into habits, dailies, and to do's isn't something I really thought about. So it's helped me plan what I want a bit better. I just wish there was a late night mode where it acts as if it's yesterday so you can accurately reminesce about what you did that day. I usually plan things out at night. Also turning a to do into a nice grocery list would…	5
Great app! A few bugs here and there. Everything I've ever checked off occasionally shows up in the to do list, so that's weird. Currently I can't check off anything from my to dos and dailies. It's a bit frustrating.	3
Didn't feel like a game	1
Useful, needs a good internet connection (I can do banking and then find that my connection is not good enough for Habitica). I have used this for well over two years and, even at work, it's a nice boost to my feeling of accomplishment when I get things done. Great co-op with family, too. Very responsive Devs.	5
The best habit and to do list tracking app.	5
The latest update has shrunk the buttons, and I can no longer use this app to check off my dailies.	3
I would really like it if there was an option to have rewarding sounds when completing checklist items in Dailies and To Do's. Thanks to the amazing team at Habitica. You rock :)	4
I love those platform but the recent update is buggy	4
It's a cool app, but I wished there was a way to know how much you have improved week by week or a similar record. It doesn't really push you to improve, just to do something, if you do less than before, it's ok, you just advance slower and you keep going slow. It would motivate me more to try and do better than the last day or the last week, but I wouldn't know how that was unless I took a scree…	4
Increible! La mejor app para organizar tu vida!	5
This app saved my life	5
This makes me so much more productive!	5
This app changed my life	5
Its a great concept. But i wish it had more engaging gameplay wherein we could actually fight bosses, dungeons etc. Without that those upgrades seem useless. Hope you try adding such a feature.	3
This is one of the best to do lists that I have used . Even Google's to do lists pales on comparison.I was surprised to find no constant ads or a pro mode which these things usually have. The widgets are almost perfect except for the hobbies make that 1x1 but it's a really good experience overall . I recommend using it . It helps a lot gamifying ur to do list makes you more eager to do them . Tha…	5
Quite fun. Actually started keeping up with good habits already just to hatch some pets	5
Idk why I still stop doing my habits	5
Phenomenal productivity application.	5
One of the few apps i can truly say that is life changing	5
This app is amazing, truly. Sure, there are still minor bugs that existed from years ago when I started my first account, but the amount of progress it went through during that time period just shows how much the developers care and how much effort they've put (even just from the display!) in towards realizing this wonderful app for all of us who are looking to better our lives. Thank you so much!	5
it would be so much better if you could walk around in the game and build stuff and talk to npc's like add a animal crossing/minecraft aspect to it that would be a whole lot more fun	3
Really good for motivating me to do certain tasks. I do wish that To-Do list items turned red slower as the number of sub-tasks under it increased, but that's just me. Edit: Feedback form isn't there.	4
I absolutely love this app, it has helped me a lot organizing my time and creating positive habits!	5
Edit: the app gets better with every update and I hadn't had any bugs for a while now. I absolutely love how it looks after the latest update - super clean and fresh. 5 stars and many thanks to the hardworking devs. Love habitica. I find the app often has one bug or another from update to update, so can't really give 5 stars, but the devs do a smashing job regardless so 4 stars from me.	5
I love the new dark mode, I use dark mode for everything so this is much appreciated. The design has been streamlined and it's easy to use. I do check off all my tasks in one go, so the rewards popup blocking the last item on the list is a little annoying but workable. Just gotta wait a second for it to go away.	4
Awesome stuff! I just wonder if its possible to have a choice for dates to be sorted from day/month/year since thats what im used to. Other than that great job!	5
Interesting concept, but the reward tiers are way too steep for beginners. You have to be using this app either constantly, or for a long time, in order to gain decent "rewards." Uninstalling, it's just taking up space on my phone at this point and I'm not really motivated to use it.	2
Well, this was great until this update. Now it's impossible to see anyting because it's so small. Please change it back.	1
Every 2 days it erases my goal list and my reward list for several hours then my lists reappear later.	2
Thank you for the wonderful update. Been using the app for years. Because of the great update, I bought gems as gratitude to the developers. Thanks!	5
Wow new app ui is looking great	5
This app is really amazing! There are different categories to sort your tasks into to suit your particular needs. The RPG aspect is really well done: your productivity reflects on your avatar in a surprisingly immersive way. It's rich with a variety of items, equipment and cosmetic customisations for your avatar; the quest feature is a great way for people to socialise productively and hold each …	5
Love the new UI. Before, you can't look at tasks when offline. It's fixed now. You can also filter the tags.	5
Really helped with motivation	5
This is the first of these gamified task/habit trackers I've tried that I liked enough to stick with. A bit buggy, but enjoyable enough to make up for it. Update: The app has a dark mode now, too!	4
It it great. But, I am using Habit now. I like to know the stats of my habits as that app shows. No hard feelings, only personal preference.	4
I love dark mode, but it has become really difficult to see whether a daily sub task is checked off or not. This latest update has really thrown me off!	2
This app has been a game changer for productivity in my life. There is soooo much to do and explore.	5
Can't open app after the new update.	1
Amazing app, love it!	5
I like this app. But currently there's a glitch which isn't letting me delete dailies and habits left over from older challenges which have been closed now. Please look into this. I tried re - installing, and using the website version, but nothing worked.	5
Can't recommend it enough. Get a party, and you'll make friends super fast and get loooooads of motivation! NO ADS. No annoying popups. Only teamwork, motivation, and rpg magic. Perfect app. Can't thank it enough.	5
This app helped me so much with acquiring and maintaining good habits! It's amazing, I adore it deeply, and will continue to support it 💛 I've bought a yearly subscription - totally worth it! This app is lovely, and developers deserve all of the praise they can get 💜💜💜 Love you guys, keep up an outstanding work!	5
It's really good really helpful. Please put a Goal feature	4
I love that's application but l Will to be in spanish version I love that's application but l Will be like to be in spanish version	4
Super bueno, salvo porque estar en la app diciendo que hiciste y que no te resta tiempo de tareas que debes hacer	4
The best way to help a nerd getting h*s tasks done! I use it everyday.	5
Habitica isn't just helping me stay productive and organized, it's also really fun to use, and makes me want to do stuff I'd otherwise try to avoid. I love everything about the app, especially the social features like Guilds and Partys which make the whole experience even better.	5
Excellenct! Love it! But there is one thing Habitica DESPERATELY needs: A vision / goal setter! Means a function to set a specific goal or describe a vision, and add tasks / to-dos / habits specifially for this goal! It might even be a main tab at the bottom of the menu. Habitica can't just only do repetitive tasks, there ought to be goals too! Please implement this...	4
Like it. It has items and you become a character that takes dmg and lvl up. Even got a pet. Love it	5
I'm only a few days in, but I gotta say, this feels like virtual adderall. I'm excited to get things done now. My to-do list doesn't scare me anymore and I no longer deal with crippling anxiety about all the stuff I didn't do every night when I try to sleep. Definitely feels like I've "hacked" my reward system. Fingers crossed this isn't just a honeymoon period, because for the first time in ages…	5
didnt work out for me	3
Nice app finally some good frikin friends	5
Excelente para organização pessoal e ainda se diverte com o jogo	5
This app is amazing, it has a very user friendly interface. I'd say its great for developing habits, making short daily task list. But the only downside is there is no calendar view. So I can't plan ahead and time things for the long run. Thats why I'm giving it 3 stars	3
I really enjoy the app and it helps in keeping up with the goals. Congrats to the team Habitica for this creation. I'm rating it 4 because there are still bugs exists and I'm not satisfied with the idea of 'only team leader can end a quest in order to for someone to leave the party'. I was invited to a party by a friend and then he stopped using it when we grew apart which made me trapped in the …	4
Wow! Adhd helper for sure	4
This app has already helped me so much and I got it a week ago!!	5
Great app that helps me keep organized and motivated. Fun spin on a to-do list!	5
The idea is wonderful, truly. But problems exist: 1) Bugs: to-do list, and dailies keep being empty. Refreshing doesn't work, only close and reopen app. 2) Monthly subscription seems highly excessive - I don't like paying for a service that remains static. This could, and should IMO, be an offline app. Particularly with the existing obvious bugs, payment is out of the question right now. 3) Tutor…	3
Simplify your life with the leveling up system and - categorizing & organizations	5
Waiting for offline mode....	3
This is a very unique and interesting game, and it's really been helping me keep schedule during quarantine, which is amazing and really makes me happy, but it only gets four stars because sometimes it doesn't keep content. I used a royal purple hatching potion on one of my tiger eggs (I had two) and both items disappeared from my inventory but I didn't get my tiger, which is really disheartening…	5
nice app	5
Great app! Has kept me on track with my goals!	5
The grindy gamer in me refuses to not be rich in coins buy in order to get coins, I need to finish tasks. I dont even feel like studying is studying anymore. Studying has become grinding for a game, making me want to do it more.	5
Asking to register right away without trying out the app is poor experience.	2
Awesome! The last time I used this app was about 3 years ago. Now I use it again and found the updates are amazing.	5
It's good and all but I lost ALL my progress when I reset my phone. I logged into it with my email as I did before then it flashed "HELLO NEW PLAYER" cmon man, help me bring up my old account back	2
The best habit forming tool ever, whether you pay any attention to the game aspect or not	5
This app is great! I've only had it for a few days, and I'm addicted! It's so fun and helps to get rid of habits and create new ones, it helps me get things done. It's so cool! I love the fact that if you want something, you've got to earn it, and it makes you feel good about completing tasks! It doesn't always tell you to rate the app and/or share it which is another plus. 11/10, I do recommend!	5
At fırst it seems complicated, but after some days you will find it handy and usefull. It really organized my day. If I could invite my friends via different social media it would be great. In the mean time inviting them via email is the only choice.	4
I love this app, it only app that keeps my interested. I love the to do list, habits and daily :) then if you want you have a change to challenge yourself. I wish they had a search bar to search up challenge, maybe a group and create group button and way to invite friends and become friends with your real friends so you can do challenges together but I would totally reccomend this app download it…	5
Needs to push its updates more, I didnt know there was an update	4
Best habit tracker app ever	5
This app changed my life. Im more willing to do the hard parts of my day because I don't want to take more damage. Seriously, this app is a God send and I even subscribed!!	5
I LOVE THIS APP VERY MUCH. When the quarantine started, I gained a few kilos, didn't exercise enough and would sit on my phone all day. When I found this app, I started to do things - even making habits that I want to have. Also, this app is also a semi-RPG game, so it's a really big plus. 5 stars, GUARANTEED.	5
Couldnt sign up . No passwords accepted	1
This app combines all the features I've been looking for into one simple interface	5
Tutorial suddenly stopped and I couldn't complete it.	1
I love this app as it actually help me to change habits.	5
Dame great app	5
I am completely in love with this app. This app has changed my life completely. Which is why I want it to get even better. Here is a small recommendation. Make a 4 week calender system (A/B/C/D week) so that if you want to make a schedule where you take 1 day off after 3 days of work, It is completely possible to make a routine that will keep repeating itself. (4dayx7=4x7day) by simple math, once…	5
It's an alright app, just haven't been able to really do much with it anymore	3
Best productivity app ever.	5
This is a really fun and awesome why to help you sort your life with the bonus of dopmine fun things.	5
So far this seems super cool! I'm excited to try it more and leave a more informed review!	5
Absolute mess of an app	1
trying to be productive	5
Just love this app,it's really awesome for managing your dailies and to-dos,for anyone who loves gamified version of work to be done this app is all yours ;)	5
It won't load my to-do's which is an important aspect. Fix it please!!!	2
I love this so much	5
Love it! Such a brilliant idea and really well executed. One of the best apps I've ever used.	5
One of the best apps that I've used so far... I'm a procrastinator, due to which my grades had suffered a lot... I came across this app on a site, and decided to give it a try... One of my best decisions	5
I really really love this app. The gamifying is really good. And I especially love the guilds with various creative monthly challenges. Another pro is that most people don't spend too much time chatting. The chatting is limited to a healthy amount (cuz ppl r busy with tasks) and it is still social enough to provide enough encouragement, sharing of thoughts and pointless banter to take ur mind off…	5
This app has helped me in doing my tasks on time. It helps me to be more accountable and be more responsible enough. The gamified style kept me going as I see how much my character levels up.	5
Just like Solo Leveling	5
Best productivity app I've used!!!	5
Excellent app!!! I would rate it 6/5 if calendar option somehow exist. Imagine you do have birds-eye view in days, weeks or even years. May not be a rating/review more kinda suggestions hehe. Admins and Developers great job! Salute to them for making this app awesome. :)	5
Great tool to develop new habits. I owe habitica a lot.	5
Too damned complicated to even keep up with. A video game hub is more organized and simplified than this.	1
excellent app	5
By far the coolest darn app I have ever played in my life!! I love the whole concept of what is trying to be portrayed here. I doubt I'd actually be good at it because I kind of procrastinate on things a lot😂but it sure is fun already so maybe I've got a chance. But thank you developers for creating this. This can really help people towards their future😊🙏in the most bizarre but absolutely amazing…	5
As much as I have loved using the app, I ultimately used more of my time focusing on adapting to the app and using it for an extra boost of instant gratification. It would also crash often on my tablet. It's a great idea, but it doesn't suit me that well.	3
Keeps me focused	5
Love it. Pretty simple, and it helps me get things done, and even helped to break bad habits like sleeping wayyy too late and waking up at like 12PM. I haven't talked to other users all that much but from reading tavern messages, the community seems very helpful and supportive. I've been using Habitica for about a year now, and I plan to continue using it until I can finally get things done witho…	5
Pretty buggy but good campion app for the desktop version	4
Great app but has lots of bugs. That's to be expected though for any app and they are doing good work.	4
Very nice productivity rpg game	5
This is the best! This inspired me to complete my tasks that I always seem to forget in doing. I also had fun at the same time! I really love the RPG-style theme. While using this I realized almost all rpg mechanism are in this but trading so I hope you guys put a trading system or item gifting or whatsoever in the next updates. Also, I wanna try becoming a subscriber for free so, hope you guys g…	5
I like it but half the time when I press something, nothing happens and it doesn't like it when I've pressed more than 3 things while the app has been open on my phone, it will either freak out sending me somewhere I didn't ask for or it will close itself	4
I LOVE THIS APP. It helps me so much when I want to get something done, and when I need to do something daily, like take my vitamins, or wash the dishes. There are also so much nice people when you join guilds. 10/10 would recommend to a friend. Note: This app is way more helpful if you're into games, points, and competitiveness. (I'm very competitive 😅) But it's still super helpful even if you'r…	5
Actually for once in my life am getting stuff done lol	5
Too hard to get started, I didn't use it	3
It just works.	5
Helped me get in control of my habits, helps me keep accountable! The setup allows me to select how difficult any task is and scales to it, very helpful	5
Really fun and keeps you working on day to day tasks.	4
I've only just started up, but this app has progressed so much since I last saw it! UI is really tidy and easy to use. It doesn't feel like everything is locked behind a paywall (though I plan to support). Tasks/rewards/etc. are easy to customize, so the game can be tailored to exactly what you need. I have ADHD, so an app that makes every task a fun/novel experience is fantastic. I'm hoping this…	5
Plz plz plz plz make it offline guys!	3
Even without an RPG element, this app is robust enough to suit any of your habit tracking needs. Its ridiculous how much better this app is compared to other regular paid or unpaid habit trackers.	5
Yo how to turn off justin?? He pops up nonstop	2
Cool app, would be better if it was as functional as the site re: challenges.	4
The experience was very good the only down side is the lack of offline capabilities	3
I do like the app. It's fun and has me coming back after I do something. But I would like to get gems without purchasing a subscription. I'm fine if it's slow but I kinda wish there was a way	4
Really love this. I enjoy the complexity and the fact that you can buy 'rewards' for keeping up with stuff and that there and consequences for not doing your dailies.	5
Would be better if each Habit had a separate reminder time.	4
This app really changed my life. I was able to make my life work with this. I've been trying to get my life on track and out of depression, and this app showed me how. Now I am keeping my house clean, keeping up with my social life, doing homeschool with my kids, and keeping up with then 😊 I didn't think that was possible last year.	5
Its awesome	5
Helps me SO much. Like seriously, commit to this, get into a "party" (kind of an online group for this rpg), and it may help you like it's helped me! I am really lazy so the progress I'm making is miraculous. It really kind of.. forces you to do what you need to do and it's my favorite mobile game there is. Hats off to the developers and anyone else involved!	5
Wish there were different "skins" for the app beyond fantasy, e.g. sci-fi, horror, real life, etc.	4
Please add archiving for stagnant dailies	4
Maybe implement something that categorises and levels up specific areas, such as creativity, language, programming, DIY, home, gardening, hygiene, fitness, culinary skills etc. Everything seems to just bundle into general exp.	4
Amazing, creative and motivating. Kudos Designers love the Gameboy pixellated feel really made me nostalgic. Amazing app	5
This app is very nice, it did help me	5
Cool but really confusing	4
Took me awhile to figure it out, the mechanics are interesting, the design is fun. It helps me build and quit some habits that i have been trying to.	5
Fun	5
I've been using this as a motivation and self-rewarding To-Do list. It works, and there a lot of communities of people here! Ranging from LGBT to mental illness, it's great.	5
It just might be one of the best apps ever made. It has helped so much with my productivity and has such wonderful features. I love it!	5
I will reinstall this app	5
The app is really smart	5
Helps me turn my crippling depression into regular depression.	5
Thanks for free widget	5
I'm thoroughly enjoying this app so far. I've been a lot more productive and on point with my tasks as well as keeping up with my personal studies and hobbies. The game aspect has been great for me to hold accountability of my actions while finding joy in completing self-made goals and gaining experience and items.	5
Super fun way to keep up with tasks	5
Might help some, but isn't for me. It annoyed me more than it motivates me	2
It was amazing	5
Nothing has changed, this dumb app still won't sync up with my account I use on my desk top. Come on, developers! And it still forces me to open a new account. This is why I won't subscribe, the help here is useless.	1
Great. I would recommend the following features: - Skills. When you work on a task, you could select which skills you will be working on. - A timer: keep track of how long you spent working on a task, and consequently on the skills. This would allow a summary of how long the player spent on each skill. - (maybe?) Skill trees. Being able to create publix skill trees for a project/hobby/etc... woul…	5
Very good app to help keep and develope new habits! Best gamification of tasks, habits and to do lists!	5
It's hard to not get bored when I being serious on something. So, I always think that life is a game. And this is a great app that can help me to get rid from my boredom when I build my good habits. Thank you very much for the developer. 5 stars from me. 😊🤩	5
Love the app so far. Great for motivation, but non-punishing, cute graphics, and lots of stuff to explore. Splitting up tasks by priority/type is awesome. It really has made everyday life feel more guided and fun! Would highly recommend for people who enjoy collecting, gaming, or seeing your progress add up. *One note is that sometimes, lists of tasks disappear/show tasks already completed. Closi…	5
Best productivity app	5
This is a great app, I really enjoy using it! There are a few minor bugs here and there, but nothing serious that prevents functionality. You can access Guilds to chat with people about various topics and check off everything you need to do in a day with a little helpful motivation from party members. Definitely would recommend this app for those who are motivated for the next level up!	4
The game aspect is fun, and can provide a little added motivation, but beyond that it's one of the best free to-do apps I've found. The organization is easy, and the breakdown of habits, daily (or other schedule) tasks on repeat, and a one time to-do list give much more depth than apps that claim to be more "professional." If you like the game-ify idea this app is great. If you want a solid, free…	5
Very creative. and a good idea too!	5
Very usefull and fun	5
É um App bem legal para organizar tarefas simples do dia a dia. Ainda estou aprendendo a usar, mas achei bem divertido.	4
I'm here for the Ninja Cerebral	5
Loving the app so far and has helped me stay on track with some chores and. My v small complaint is that the date is expressed wrong (for 90% of the world) as mm/dd/yy, wish I could change to dd/mm/yy, any way to change that setting on the horizon?	5
The BEST app for motivation and tracking! Even putting the game aspect aside, I have never seen a more user-friendly app for habit/task tracking. I love how there are different categories for habits, tasks, and daily to-dos. It's customizable. Getting coins is motivation! Ive recommended it to everyone! Only thing I wish it had: a way to see your stats based on your missed to dos or frequency of …	5
Habitica is a lot of fun to use. It helps me more to be productive by applying RPG concept into my everyday tasks. The quests and collectibles are also fun to do - it is so rewarding.	5
First day of the week setting doesn't work. When the calendar pops up it shows Sunday as the first day of the week rather than Monday ( i have selected Monday in the settings) Please fix this.	3
Habitica had helped me a lot in my efforts to improve my life. I've been using Habitica for 2 years now, and it really provide me with the motivation & support needed for me to achieve my objectives.	5
This is an awesome app idea for really anyone to use. Just a great app	5
Awesome app. Helps me keep track of my daily tasks and routine. I like the fun reward and punishment system in the form of an rpg game. Keep up the good work!	5
Love it but would love it more if I could look into the future to see what I have scheduled easily	4
I enjoyed using this app for over the past 2 years to improve my life, even if it was by a little bit. The community is kind and friendly. But I think it would be better if you could filter out what type of guild you want to join. I don't want to spend too much time scrolling down just to find the right guild.	4
App is pretty good but everytime I add an item to my to-do list or habits etc it goes back to the party tab. So annoying to go back to tasks every time I add something	4
This app has actually really made a difference in my life. I am so grateful BUT I feel it could be WAY better. Can you add in: A Timer (for workouts) and perhaps Minigames?? (The higher level your character the more powerful stuff like that 😀😀) Thank you devs!	4
Great way to keep track of things to do on the computer and phone	5
I didn't get it, but I don't know I'm the demographic it was made for.	3
I didn't think this would work, but it really does help to build habits. The interface is pretty simple and easy to understand. The complexity grows over time. I'd really like a way to share to-dos with a group. Reward those for taking the initiative to take some of the teams shared tasks.	5
Super great!!	5
I seriously like it	5
I really like the app but the downside is no offline mode, this will be a better app if it had an offline mode.	4
Thank you this made a difference	5
One of the best habit organisation apps and it gamifies on top, the only feature that I would really need is managing dailies in groups, like meals in group.....etc.	5
What an adorable and inspirational app! I have actually done things I was considering putting off because I didn't want to lose too much life and thus important items I really need/like. I've even gotten my partner to download it! It also doesn't penalize you too harshly for "falling off the wagon," so to speak, and not using it for some time. As in, days to YEARS. It's the perfect combination of…	5
Really helps me to keep things organized and is a great way to keep myself on track!	5
Great idea, but.. I liked this concept and could see how it could definitely help, but some bugs to be worked out and in some place over complicated. Main issue for me was the reminders didn't work on android (galaxy s8) which made this unusable. Also struggled to understand the difference between "habits" and "dailies".	3
It's a great app, and it's fun and intuitive to use! But I do have one concern. Clear notifications button is not working as of the moment.	4
Its great but I need to make a habit to use the app.	5
Cute app. Could do with a more user-easy interface for the lazy out there but nice little motivator	4
Just love it	5
Does what it says, but unable to re-arrange the tasks to my liking via the app. Have to use the browser to do that.	5
Good design and easy to use, i dont like the avatars but thats just a preference, for some reason i cant delete some tasks and it makes it feel cluttered, great for someone with adhd/add or anyone who generally needs reminding on tasks that others may not	3
Excellent for daily tasks and scheduling future ones	5
This is a fun way to build the keystone habit you need to make all your other daily habits click into place. I think the mechanic of guilds is probably one of the most engaging things about it. My critique is that in order to access the challenges available from the guilds you're in, you have to get on your desktop. This is super annoying because I'd rather only use the mobile app. Fix this and i…	4
Life changing app. If you have any affinity to video games and want to better your life you're in the right place. This app saved me.	5
Nice app although the first sentence of the description of the app isn't nice. Life shouldn't be treated like a game.	3
Excellent app, they greatly improved the quality since last time I used it. I'm a user of the web page for 5 year now, and the app was a little outdated but know it is very complete and useful. Thank you!	5
Perfect app but you need to add night mode	4
It sounds crazy but this app has basically changed my life. I'm more productive every day as this game motivates me to get my life together. I like how I can give myself credit even for the little things, the house chores no one will pay you to do or thank you for but that still need to be done. It can also be very social if you want it to be.	5
Amazing app.. One request from the developers.. This app is turning humans into better humans so 'the rouge' class should be renamed to 'the Ninja' or something as it affects the subconscious brain of users without even them noticing it..(this pure psychology) And this is how low of attraction works.. Never talk or think of things which you don't want in life.. You yourself would not want anyone …	5
Great interface and concept. What I appreciate most that other apps don't do is that they distinguish between habits, dailies, and to do's!! Props. Also I love the guilds concept as well. One suggestion is maybe have a clear visualization tool too see the progress made. But I get it the point of this app is to level up your avatar! Overall good job 👌	4
App is good but I don't have audio using it, how can I fix this? Will rate 5 star if audio will be fixed.	3
I have used this tool continuously since 2015 and it's a fun way to get yourself to do tasks that otherwise you might not be motivated to do. I've been a subscriber for almost two years. I would highly recommend Habitica, whether you prefer to do it all on your own, quest with others, take up challenges, or just keep track of your flossing. There's a lot to out and I've never gotten bored in almo…	5
Changed my life. The group feature, when you have a family, is a must have. Seeing our avatars morph and change while we level up our life, priceless. This app is worth it, it's one of the best decisions I've made for me and my children. They're excited to do chores, and I no longer procrastinate. I just can't recommend this app enough.	5
A good app. Love the concept. Helped me	5
Love habit forming features! Wishing for more heirarchy in to do lists.	4
This is the first time I found an app which can read my mind. This app really knows the scientific importance of reward. I really advice anyone to install this app and give it a try especially if you are a student.	5
It is awesome super helped me But I have a suggestion you can improve your chat session and to invite members to party you can make so we can explore users and invite them	5
Need a combination for habits and dailies	4
The app is so good but it's completely destroyed by the fact that it's online for most things as far as i know you need internet and the point is that you can use this even when it's offline i hope they fix it after that it deserves all 5 stars	2
I've never enjoyed accountability before this... Our whole family partied up and is having a blast PLAYING to do chores. Wonderful concept!	5
I'm really enjoying the fun parts about this game and hope that it continues to grow. Downside is the glasses and headband can't come off the avatar. So my character is stuck with them for awhile.	5
Super helpful for habits and breaking bad ones	5
What an absolute boon. My boyfriend has ADHD and a love for video games--this app helps him remember and complete tasks much more easily than unengaging notes-app checklists. It really does wonders for motivation. Habitica is helping me survive grad school AND manage the mental load of day to day activities. I'm really excited for the new "groups" feature to be rolled out as well. Thank you so mu…	5
Turning your life into a RPG is a great way to stay motivated. If they can provide something like a monthly habit tracker, it would be great	4
This app has become my life. I truly love it. It helps me work towards my goals in a very fun&supportive environment. My down points would be (mainly) because of gems. While the game is free, there are certain things you can only get through buying gems. Which is understandable, they need to be able to support themselves&the game. My problem is that while you can earn them for free, it's damn nea…	4
Loving the app so far! Just a minor note: I can't seem to unequip my avatar's glasses or headband...	5
Too complicated, too many details	2
Awesome	5
I have used Habitica for a year now, and I would suggest this app to anyone who wants to meet people with the same goal of building healthy habits. I have met amazing people, battled in hard quests which driven me to finish my dailies, and joined a variety of challenges! The app still has some glitches here and there, but I mostly use the website.	4
This is great! After having played it for three days I was begging my mom for chores to do!	5
Great app, good concept. Needs refining I found the 'change values' area and within 5 minutes I owned every item in the game. I have no idea how to use the actual game functions in this app... As said before, it's a good concept but needs refining.	3
Hi kindly show highest streak for a habbit. Which will act as high score to break the next time and we keep on improving our streaks!!! Sorry i took away a star.	4
Getting into it, following the mechanics and I feel motivated to do ans comolete stuff to earn Exp. I haven't used it much but I'm satisfied already. One small thing I can't choose to wear no glasses and I believe this is an unintentional error.	5
10 out 10 recommend for anyone who wants to stay organized and goal oriented without knowing you're doing it! This app is For beginners looking for a concept to start planing or motivating & go getters who want a fun and resourceful way to sort your goals and stay motivated.	5
Hey guys great game but I'm a mage and my mana keeps changing itll go to 300 and then ill level up and itll drop back down to 268, its been doing that for a few days please help us :)	4
I love Habitica! I've used it for several years, both the browser version and the app. I love how simple it is and I love the social aspect! I've been able to make friends and find support through guilds, and my party really pushes each other to be our best and continually improve! This app has helped me focus on self care and get better grades in school. I'm building healthy habits and having fu…	5
Has really helped me get more done and stay on task!	5
Good but have more levels	4
The best out there.	5
I love Habitica. It works to make the things I have to do at least somewhat rewarding and I can set fun goals for boring tasks.	5
Not for couples or friends. Subscription for "teams" to share tasks. Doesn't think money from their micro transactions shop is enough.	2
Great app. I don't even play video games but I love the set up of this application, the split into habits, dailies and tasks is perfect. The streaks and rewards are motivational, I like the capability to set reminders and being able to have a task list widget on my home page. I tried a couple other to do apps and none have kept me consistent besides this one.	5
Great! No errors found, super useful, fun, good design, and small (I guess?). Super recommended!	5
it has very very few bugs in the mobile app but i love it!	4
With your friends you can play this game. You progress by completing tasks you set for yourself. Often i see t the app and think, well, 10 pushups isn't that hard, might as well do it. Without the app i wouldn't have thought that. Set small tangible goals. It motivates me to do the things i want to do but can't get in the habit of doing.	5
Fantastic app.... I have tried many other productivity app and used to find it difficult to follow them every day. After I switched to this app.. it became all fun and I am getting motivated to complete the tasks as I earn rewards Suggestion to developer: I use browser version more than mobile app. please add reminder feature to browser version as well. Also please add auto date parser while addi…	5
Crashes	1
I love the interface, the overall concept and easiness of interface. Rewarding and fun to use, has helped me alot with my life goals!	5
Love it, keeps me motivated but you should add something to share and make my friends join, like an invite, not the one you share your level up	4
I tried buying gems but it doesn't look like I got the gems.... But my balance in the Google pay thing has gone down. Last time I throw away money on this app. Update: the gems showed up the following day. Not sure if that's because I emailed them about it or just it took several hours to go through.	2
The only app that really helped getting through my really busy schedule	5
Edit (June 5, 2020): Fix the party chat. Please. It is very annoying having to switch to other categories just to see the new message. Even the private messages are the same way	3
Helpful and fun	5
Love this app. If you need help sticking to a schedule, meeting goals, or want to better your life in any way this app is for you. Guilds and challenges promote productivity. Separate categories for habits (positive/negative), daily tasks, and to-dos keep the app structured. Wish there were more items and rpg aspects after reaching a certain level though.	5
The app itself is useful but they charged me three times for one subscription and will not respond to me when I email them.	2
Great Concept, good community functions but some additional advice/tutorial and examples for planning your day / tasks with this app would be great	4
I cant Register on this app. It always says 'server connection lost '.	1
I love this app. It keeps me on track and I have fun while doing it. Whatever aspect of you daily life you want to improve, you can set tasks and goals to help you achieve it.! 💯🙋🌄	5
Really helped me stay on top of online classes this year!	5
I love this app. It's helped me so much. There's only a few things that bother me about it, like how you can't change the order of dailies but besides that it's fantastic.	5
This app is really cool and can help build many habits and keep track of to do lists. However I would like options to customizer the avatar more? Like I accidentally added glasses and there isn't a option for none. Can you please add it?	4
make it offline... then it will best appp	3
The best app for people with or without ADHD	5
This app is fantastic! It helps to organize tasks and bring new positive habits into your life. And does it in a gamified, entertaining way. You should at least try it out!	5
Thank you	5
What is going on? The app says "server connection lost"	1
Very nice app. Let´s you make reminders and actually feel rewarded once you do it.	5
The app has improved over the time I've been using it. There are a few things that would be useful to have. For example, the ability to search for challenges like in the website. On another point, this app has really helped me improve in different areas of my life.	5
Love love LOVE the idea behind this!	5
This app actually made me want to stick to my habits. The money/exp system is kind of broken and arbitrary. Fun way to think about your habits as life skills and the more you do it the better you get at it.	4
The best app to become a better person and acheive your daily goals developing great habits! The whole community is cheerful and i may thank you for taking the time to develope such great considerate features for free, you've really helped us all 💖💖	5
App is cool on the surface but has some things that could be improved on. For example, some things just aren't finished or stop working. In a couple customization menus there isn't an option to take off accessories while that option is available in others. Menus suddenly stop working and you have to close and reload the app to fix it. There is no in depth tutorial and a lot of stuff is up to you …	3
I love this app. It's amazing and has made me a bit more productive with the few days I've had it. I just wish there was some sort of game that comes with it. I know it isn't the point of the app, but I feel like if some sort of game was added, there would be more incentive to do all your tasks. I know it's probably just me who has this issue, but a game really would add a lot to the app (even a …	5
App keeps crashing when launching, couldn't even get past the title screen. Edit: After signing into the website version, tried to install the app again and apparently it worked!	5
WHY? Why my habit streaks keep disappearing every single day!? :( Edit: Thank you, developers! I didn't notice that option I love this app❤️	5
So far the best productivity app, with this being productive is fun	5
I soooo love this app. I am not a gamer but gamifying my habits makes it more interactive. You wouldn't want your avatar to die so you'll do your tasks.	5
This app has helped me make my days more productive, and I like the way it's put together. Two suggestions for the devs: 1. Introduce an option to stay indefinitely at one level, only needing that fixed amount of xp to refill your hp. With the ever increasing xp requirement, eventually I won't be able to keep levelling up and will start dying, and that'll be demotivating. 2. Make a holiday mode t…	5
I am in the unique circumstance of liking to gamify my life and also being horrible at incentivizing doing daily chores. This is literally the perfect app for me.	5
The app doesn't have any option to notify you, so last I played I had difficulty forming habits	2
So far, I love this app and the idea behind it. It holds me accountable for my tasks and habits which i really love. I would totally give it a shot.	5
I wish there was more interaction with party quests	4
Terrible UI	3
The RPG elements in this app are way more in depth than I was expecting. I enjoy video games a lot and Habatica has made habit building much more enjoyable for me! I also really like the social aspect of being able to encourage/be encouraged by other players. App takes some getting used to, but there's a very good tutorial section that explains the system well. The devs are also very responsive t…	5
Beautifully done app	5
Ugly graphics. I wish it measured my walking distance like Pokemon go	3
Idk what happened, but from the start app was just alright, and it was very nice and I was happy that i found it. But since a few hours it just stopped working! When I'm trying to complete the task it just doesn't count. The mark is appears, but several seconds later it vanishes!!! And also when I'm trying to complete a part of assignment it doesn't count. Please fix :(	2
Opaque, complicated, janky. Overall, a frustrating and confusing ap.	1
Puts the fun into prodfuntivity!	5
Great to-do list app with addicting premise, but can't remove glasses customization option once they're on. Please change this! I don't want my avatar to have glasses and can't remove them since the option doesn't appear to let me do so. Will change review to 5 stars once this is fixed	4
Great app for those who need extra motivation This is just my idea, but why don't add timed to-do (in image of monsters or something) that will reduce the health of the protagonist (or any negative effects) if they did not finish it on time It may as well push the user to work immediately later than procrastinate, I think I got more ideas but will be too long to write here, so... Anyway, nice app…	4
It deserves more than 4.2★. I'd rate it 4.5 for productivity.	4
Couldn't really understand the purpose of using the app. It's either playing games or keeping track of habits, a bit confusing.	2
Neat!	4
Good base. Needs greater rewards and harsher punishments. Include more visual/audio cues for success and failure. Take notes from other games that make a big show out to clicking a button, which heightens the stimulation the player recieves.	4
Awesome app. Great for staying productive and getting things done. I have one suggestion for the developers though, in the party chat, when people cast skills for the party, it tends to block up the chat and interrupt conversation. It would be nice to have a different section where it shows when party members use their skills. This also leads to chats being deleted faster. Anyway, just a suggesti…	5
It takes too long to be fun, and sets you up for failure. At the start you are asked to create a small # of tasks. However, the number of tasks you do is directly related to how fast you level. And a few tasks means it takes a LONG time to get to level 10 which is when you finally get to pick a class. However, you could level faster if you add more tasks, but doing that before you are ready will …	2
Amazing app that helps me stay motivated and productive!	5
By far my favorite To-Do and habit tracker app. The game and in-game incentives really help and make it fun! Highly recommend this app!	5
Really good recommend to anyone who wants to get their life together. Be diligent and strict with it and you'll see significant changes long term, and the fact that it rewards you for your achievements gives you that dopamine hit you need to keep going. You can even make your own rewards with things like an hour of TV or social media or whatever as long as you achieve enough tasks and the app acc…	5
I haven't been using Habitica for that long but I've already fallen in love with it! It's really helpful if you want to keep your life organised. Amazing 👌	5
Phenomenal community. I was productive for the first time in years because of this app. Would recommend to anyone.	5
I really love this app! It helps me stay on track, and do what I need to do. It prompts you to do your tasks, because you earn points and level up when you do them. It has different sections for tasks (habits, to-dos, and dailies). You can set reminders, choose the difficulty of the task, set a due date/frequency, and so on. It also has other fun activities, and it is easy to use. I would really …	5
I deal with depression and anxiety which makes it difficult to sometimes even get out of bed and stay motivated to complete daily tasks. I'm a high school student with tons of work as well. This helps me keep track of, motivates me, and gives me a sense of accomplishment to keep me going. I have shared with app with friends, family, and even my therapist who encourages others to use it! Its easy …	5
I'm in love with the app. It motivates me a lot and really helps to stay on track. Apart from the cool gamified features, it also has a huge and very friendly community, where you can get support and answers to pretty much any questions.	5
Awesome	5
Love it!	5
My favourite productivity and habit tracker app, even though I don't use too many features it can provide. It's attractive, and it feels like more fun, but I like to keep it simple. Together with my (paper) Productivity Planner I am unstoppable!	5
In the widgets, you can have many dailies and tasks, but for Habit, you can add only 1 habit, please look into it	3
It's been months and I still cannot delete this one habit. It will not delete and nothing I've been sent has been helpful to figure out why. About ready to find a different app cause it's driving me nuts.	1
Nice	4
Very cool app!! I love it.	5
Adore this app! It helps me stay on course and have fun too! Ive been trying to cut down on phone time so this makes a game out of my regular life so this game is perfect!	5
Both useful and fun. I was surprised by how helpful it could be. You can also learn new things from the challenges and guilds.	5
I just got the app and it is truly and honestly great! I'm super disorganised but this has really allowed me to consolidate all of my tasks. An incredibly smart, entertaining yet useful, and engaging app. I truly can't oversell it and now I really wanna stop writing this review to go level up my character. I want a staff!!!!	5
can somebody tell me why the heck wud this app wanna hv accesss to my gmail account???	1
Great app, would be nice to be able to check the checklist items in todos.	5
The app is what you make of it. A big imagination will take you far. I wish it had better mobile support though. Many functions require a computer. And it'd be nice to be able to preview all the cosmetic options that cost gems (the cash currency). Without a preview, its almost gambling, especially with hairstyles	4
I've been using this for about a year and a half and it has helped me hold my life together. It really does help you build habits, you just have to find out what works for you and sometimes switch things up a bit, because there are many ways of going about it. Challenges are very helpful, guilds are a great place to find like-minded people with similar goals and interests, quests done in parties …	5
Nice and easy!	5
Apps like these motivate me to keep going.	5
Awesome way to stay productive	5
Amazing app. Really motivating with an online support team. But so long as its online only its hard to depend on it.	4
At first I was very sceptical, but after using it for a month im a huge fan.	5
Life changer... Definitely a must have, complements the discipline/habit building journey wonderfully... A must have... Seriously am grateful i found this app... To always Good Days❤️👍🔥💪🏻	5
Love the app, but it crashes a lot on my phone and my husband's. Also the alerts are repetitive and cannot be dismissed	3
I enjoy the app very much and it's helping me kick some bad habits. The only thing I'm not a big fan of is that it often times does not auto refresh after clicking an item or useing food. Other than that, I like the app a lot.	4
A fun way to motivate yourself to get out of a slump or build better habits. I can't recommend more.	5
Need to register before use	4
10/10. Subscription is not necessary at all, what it offers is purely cosmetic.	5
I love this app and all my friends use it and compete against each other. This is a brilliant concept! however the app seems a bit buggy. I was in beta programme and then I was unable to send invites or buy certain items. I thought it's because of beta being unstable so I opted out of beta and reinstalled the app, still didn't fix the issue. I'm the party leader and the group isnset so that only …	4
So much I love it	5
It's not like the web site	3
Pretty good!	5
It's an amazing app which makes you stick to your routine. I will surely recommend this to friends and family. I would like you to add some more feature like a timer (Pomodaro Technique) and please provide a option for adding attachments to the tasks. Also if possible instead of notifications reminder alarms are better. I f you could add them I would be highly grateful... Thanks for such an amazi…	5
Can I use it offline?	3
Very useful and helps to keep organized. Gameify you're life! Plus you can find like minded people and join challenges, parties, and guilds. 5 Stars!	5
Pretty good app. However, there's a point where I'm not making much progress unless I have gems. I understand why the gems are there, but as someone who isn't willing to spend money on an app, it makes it a little boring. Overall, great experience and helped with my habit building.	4
Most unique app I've ever used. So far so good. Fun. Makes me want to earn coins by completing goals and tasks so I can buy some fancy stuff or a pet.	5
It is a pretty good concept it's just not for me	3
Getting my work done in a motivational way, with friends in a group! :D	4
This app seems great. i've seen other apps gamifying your life, but what i feels really works, is that you can make a party of friends, and get productive together, while clearing dungeons and getting loot. if you make a group of friends, be aware that even if its just your friends in the group, a single swearword will get you banned. not a warning or anything, straight up banned. i got banned be…	3
Be honest guys	5
I have just downloaded this app and I can't register. Is there a reason for that?	1
This has helped a lot keeping me on track with dailys!!	5
Best	5
Love the concept behind the app!! I feel silly but it still works. I am able to complete most of my tasks. My only suggestion would be: please, let the characters not be pixellated.	4
So useful and cute!	5
I can't delete tasks from the old challenge anymore	3
I was introduced to this app by a friend, and it definitely didn't disappoint. The task manager is very fun to use and is extremely customizable, and the events and group activities make it even more fun, though the menu navigation could be improved, as well as the rewards for doing tasks, because I don't feel too motivated to do the tasks still	4
Great concept, but there's issues with the widget, it shows nothing.	3
Changed my life!	5
This is fun and cool it would be 5 stars but you know what habitica WE DIE SO QUICKLY WE LITTERALLY LOG IN (ME AND MY PARTY) AND WE ARE DEAD BECAUSE SOMEONE DIDNT LOG IN THAT DAY, ALSO THERE SHOULD NOT BE BOSS DEALING DAMAGE IT DEALS MORE DAMAGE THEN I DEAL TO IT, THE HEALERS HEAL 6 HEALTH OUT OF 50 AND USE 25 MANA POINTS MY TEAMATE JUST USED ALL OF THEIR MANA TO TRY AND KEEP ALIVE AND I DO THEN …	3
The auto populated list of dailies was never-ending and repetitive. Who needs to floss 30 times a day? I died because i didn't take the time to delete each one individually. Honestly when i scrolled down to try to find the end i couldn't find it and felt i was making no progress in deleting the duplicates.	4
I've used this for 5 years. They keep improving it and it gets smoother and better with each version. Love it.	5
LOVE IT!!!!!!!!!!	5
I keep running into problematic bugs right away	2
Really well developed system which is fun/easy to use. Since the good functions aren't blocked by premium necessities it makes this app a well worth download. Adding a schedule would however benifit as it would allow the users to keep everything on the app itself.	5
Changing my review to 5 starts as the server issues were in fact fixed and after using the app I really like it, great sense of community!!	5
Loads of bugs, can't even register. Probably due to server side reliance and poor state management in the app. Will definitely avoid.	1
I can't download it to my phone	1
Y doesn't the reminder work!!! I m trying m trying changed all my settings according to this and it doesn't work at all it doesn't remind me i tried and set a particular time and i was waiting but it didn't i m fed up really this made me more anger than ever🤧🥵😶😶😶😶😑😑😑	1
Very fun! Makes me want to get things done!	5
So far I like it, however there are so many items on the lists when you first download it that it gave me anxiety. You can only delete them 1 at a time and it wants confirmation before deleting each one. If the developers see this I suggest only a few items on each list to give as an example instead of the 200+ I found on my lists that all repeated. Although the check here for downloading the app…	4
Broken app on Android. Tried to create a new account and objects were missing from the app. For instance, the initial tutorial only had pictures and no words. Also when making my avatar, there were no images or options that showed up. Worked fine on my wife's iPhone but not my note 9.	1
the app's interfere is really irritating it's already sets meaningless things for you in infine order	1
Have to register and the app doesn't even work. Nothing happens when you press "let's start".	1
This is one of the best apps for self improvement available for gamers. The idea, the execution, the design, amazing. My only gripe is that the error messages you get only sorta explain what went wrong and I have not successfully used the stat correction page once. Always error messages. Hopefully these bugs get worked out.	4
It's cute, but the fact that I cannot view a calendar with my progress kills it for me. I am going to stick to Loop app.	4
Such a thoughtful self-help app. Life saving for ADHD. THANK YOU for the wheelchair option in the icon... the diversity was such a nice surprise. I do wish there were different task layouts to choose from for the front page -- I'm just easily confused I guess! Thank you staff.	4
Please add a black mode for the widget. Like amoled. I would be really grateful. The white background burns lol.	5
Its such fun!	5
has motivated me, kept me productive, and is continuing to do so for more than a year now! used this app for two full school years, tried others, but nothing really compares to habitica! this app is awesome and super fun! makes work more satsifying to complete and the party system is very helpful as well :)	5
Best habits app	5
Can't describe how much this app helped me.I couldn't keep a habit at all,but with this app I reached a point where now I can have multiple habits.I love it so much.It's helping me everyday,every year.Wish all the best for the developers.This app has everything you want and it's beautiful+helpful.If you are looking for a habit/task app then this app is for you.Just download it already.It will hel…	5
Love this app and use it daily! Great for task managing and motivation if you like games and collecting things! :) There are a couple of bugs though, and the app does not support some of the features available in the web version which i find a bit odd. The phone is the best place to keep a to-do list as it's always with you so i dont understand why the app isn't a priority. Im also missing an opt…	4
Great app so far, still not sure about how everyting works...please can you create some warrior monk feature? (like shaolin rope, ecc.) Good job anyway!	4
It's a good app.	4
I like it easy to set up, every thing is online and accessible from everywhere keeps you motivated, with daily task, habits and to do list, and between a task and the other one enjoy spare feature that offers.	5
this has gotta be like one of the best most unique and useful apps out there. seriously great! 🖤🖤	5
Can no longer add tasks to challenges. Data won't save. Rubbish app.	1
Good app was finding it useful but it's not made clear how you join the guilds or when your reg for a challenge has been ac epted no space to write diary so how do you know people actually were if there was a section for diary overall I found the app very confusing	3
It really is worth it to download this app. Thank you for designing this wonderful app! Thanks so much	4
I absolutely ADORE Habitica! It's changed my life - it's the perfect goal setting app! It keeps me motivated without making me feel overwhelmed. It's the perfect amount of detail and convenience without getting too complicated. Would LOVE to see a children's chore app from the same people - I've tried 3 and none of them even come close to being as helpful as Habitica is for me. Thanks guys!	5
This app seems to make me want to procrastinate more?	3
This app has a fantastic concept that being an MMO style game based around your success in real life. The game is entirely server based and I have a good internet connection but the app would constantly disconnect. I would like a single player mode of some sort no need for like a story or something just something to see your effects in game. So because of the insane amount of server issues I have…	3
Amazing. Love it. I can keep track of my daily and to do tasks and reward myself by seeing my character grow and level up and I can buy him new things with the coins I earn from doing tasks. The only bad things is that the game relies on honesty. There's nothing stopping you making many tasks and just ticking them off to the get Gold rewards.	5
Graphics are too bad please change it as a gamer we need very good graphics.& And it should have sound and sfx etc example - like the game" pocket morties "	3
This is like playing RPG in real life, sort of isekai in your own world. Thanks for the the great exoeeience	5
I need help, party and guild is buggy for me. Only a blank page is displayed if i open that. Pls fix this	3
This is honestly the most fun app I've ever used for to-do lists.	5
No good as other applications but good for games and one task or goal like da daily routines work	2
Love this game. Sometimes have trouble connecting to the server though.	5
Is the best app for organisation time! Everything is clearly and look like the game! You have yours avatar and you can buy new challenges and can take in lots of event. I love this app! This is the best application what I see. Now all my day is easier and I learned plan my life/day	5
This helps me deal with my procrastinating issues and has helped me a lot more than I thought it would. If anyone struggles with being productive, this app will help you manage your tasks efficiently! It's an amazing app!💜	5
I like the idea. I've been using this for about 4 months, I guess. Until now, I haven't any complaints.	5
Motiva a mejorar es brutal está aplicación	5
It does what is it says, love this app. Would there be more features like history and analytics about habits and routines etc.	5
So far a little lonely, but really fun! It really is like playing a game! I almost have enough to buy a real sword!	5
Good	5
Stuck on setting the user name, no error message etc. Used to be good	1
Good game like real game 👌👌👌	5
I love Habitica! I am particularly bad at getting things done and this app has helped me improve so much. It's as it says, gamifying your tasks. I am on level 12 and I have only been doing it for a week! If you need a pick me up with your chores and Todo lists then check it out.	5
awesome app, love the prize feature. i would give 5 stars if these two issues were solved: 1. app does not notify me about dailies even though i set a reminder for 7:45am; 2. one of my hobbies that can be checked as both positive and negative stays green forever after checking once, does not refresh at night, is that how its supposed to be?	4
Fantastic absolutely best of it's kind. No ads, great system of to dos dailies and habits (that you want to have and break) plus the tavern/guild/challenge/quest/party system really keeps you motivated, as does the in art or out of world reward system. Absolutely fantastic.	5
Is there a black theme coming up?	5
Awesome	5
Ive used this app a couple times now, only uninstalling because school ended, but this app is amazing when it comes down to it. It encourages people to do the stuff that they need to without the complication of being told off by others. Plus, it has a cool rpg theme thats great for anybody who has grown up with/rpg game like elements.	5
Seems like it could be fun, I just had a hard time getting into it.	2
Love this	5
It was amazing! I just didn't have the time to set it up all the way.	4
Unable to download it beyond 78% even as other apps download in a second	1
Waste of time. Unhelpful and unmotivating.	1
This really helped me hone my time management skills while at home and helped me to stick to a daily routine. Wonderful. I love the video game aspect of it! So interesting! Brings back childhood memories. 😊	5
Habitica is the best productivity app I've used thus far. It lasted me for months. The quests are the most motivating feature, and I was able to take down a couple bosses solo. However, motivation dried up weeks into my first fetch quest because despite being extremely productive, I had no chance of finding even one shard. Unless you're comfortable teaming up with a bunch of strangers to take on …	4
I really like this app, it pleasing on the eyes it's well-designed, has a lot of social features but remains simple so you can focus on your goals not running the app. I would suggest to add an ability for "gold" that is currency only valuable to you so that your personal rewards, aka don't work against playing with your avatar and currency of that kind should be able to be exchanged within party…	5
This app helps motivate me to complete my personal goals. Love it.	5
Сам сервис очень крутой, но пожалуйста сделайте более понятный интерфейс для «Habits», пусть они они становятся серыми или изчезают, когда человек отметил свой прогресс за день. Я банально не помню, отмечала я свой прогресс сегодня или ещё нет, а показатель в виде цифры или зелёного/рыжего цвета мне ни о чем не говорит.	4
Been using Habitica for a few months. Tried a few other to-do list games, none of them beats Habitica. Best way to keep track of daily life and still have fun.	5
Great app!	5
Seems like I really great app, but I just installed it and I couldn't get passed the avatar creation screen :/	3
I love it! One thing I had a problem with earlier was that if I didn't have internet connection, it wasn't possible to log my dailies in. Now I have unlimited data, so this isn't a problem for me anymore, but might be worth solving this for other players. Everything else is just wonderful and a big help to life organization for scattered-mind people like myself 😅	5
This is a great app. It's helped me stay on task with everything I need to get done.	5
Amazing even if you are not a nerd really helpful.	5
Kept bugging out trying to register/log in	1
Started using habitica on January 1st of this year, as a new year's resolution to manage my time and habits better, and it's been a huge help. Especially love the party aspect, and the way it adds social accountability to missing or hitting targets. Very pleased, thank you for all the work that went into this app.	5
Too many errors	1
This app has helped me keep up so many habits and routines. At first I struggled with it a lot, but I soon joined a party. The quests are really helpful to keep me on track, and there are others in the groups to help out too.	5
My friend loves this app, but its not for me	3
I'm constantly finding little glitches in the game that throw off what I am trying to do when I am trying to earn points. Thank goodness for husband and siblings who have played this enough to know how to fix things when they go buggy but I don't appreciate not being able to go to customer service or send a quick email to help them update the system and fix it.	3
Great concept! Has me waking up on schedule and doing my tasks so I dont loose life and earn exp! Just one thing. I cant do quests. I got the dust bunnies quest but I have no clue what to do with it. Help?	4
This app is awesome could use better graphics but overall the idea of it is legit af	4
I love this app so much! They make it really fun for free players too, so you don't feel left out if you don't spend money. I have decided to get a subscription though since it's such a great app. It has my whole family super motivated, my kids are actually loving doing chores! And I also love all the social aspects to it as well. It would be cool of you could assign names for your pets, and the …	5
Helpful	5
Awesome app,very helpful for forming habbits.Thank you for this wonderful app.	5
I've been using Habitica for a few years now and while I love the idea, from a technical standpoint the mobile app is broken. It feels like something you would have on your phone back when touchscreens were a new thing. The most annoying bugs are: party screen not updating after you accept a quest invitation so you're not sure if you accepted it, spamming buffs sometimes reduces your mana without…	3
I like this app, It is an amazing tool, however I couldn't find calendar and where I can track what I have done. Could you help me find it?	5
Just downloaded the app better review later on	3
Not gonna lie, I found this app from a tik tok video. I downloaded it to laugh at it, but it turned out to be an amazing app.	5
Thank you developers for creating such a marvelous app, i found app history on the link you provided below, and it has all records of everything. This app has really changed my life, I hope to see more such apps from the developers. And there are no cons or bugs i have faced till now. May god bless the developers for improving the lives of people, I would rate 7 stars for such a extraordinary app…	5
Great app! I would like more progression content. Resetting levels is easy implementation, but gets stale quickly. Mages do too much damage. But this app had been transformative and amazing. I will consider contributing to development.	4
Cute and entertaining, definitely helping me to stop bad habits!	5
fun and helpful. graphics are awesome. just needs a few tweaks. too easy to cheat. i don't like the tavern because i am in recovery from drugs and alcohol so it's kinda anthemic. maybe a temple option would be a better social forum for inclusion for those of us who don't drink and/or use drugs. it would also be nice if you could continue to see completed to-do items after you have checked them so…	2
Wonderful!	5
Great Concept	5
Looks promising but I can't create avatar due to this error: path 'profile name' is required.	3
It does not seem possible to have a simple shopping list shared with another person... Nice app, but useless.	1
Great! It's a great game to motivate people to do big stuff who just keep sitting on the sofa and don't want to move.thank you creaters of habitica.😋😁	5
How to See my completed tasks ? I am confused as I accidentally clicked on done and tasks stopped appearing on the list Obviously. But It creates problem cuz you didn't do but it checked. So please add feature so we can see all our completed tasks upto a month . So we can see our records and edit any possible mistakes. Thank you. Other than this small part This app is best for me. I am requesting…	5
A great app to keep you up and moving, especially being in quarantine :) (this review was made at the time of covid 19)	5
OK, I love the app, it's great, but the notifications just doesn't work, they are broken, and it's the main feature I'm looking for, fix it in order to give you the five starts	5
Great for geting your life together	5
Very helpful	5
Great	5
WOW I REALLY LOVE THIS APP!!! Such a great idea. I first downloaded it for my youngest daughter to try help her with responsibility & organization, we connect daily on the app to check each other's progress. I generally enjoy this game, it is the only one have on my phone.	5
I should be able to use the app when offline, and the app should sync the changes whenever connected to the internet. It shouldn't force me to connect with the internet for ticking a checkbox!	1
Very fun, good game, helpful and inspiring	5
This is wonderful but I really need to be able to use it offline as well	4
Its actually improved how I do things, and caused me to be more active, I love this app!	5
I love this app, I just wish it wasn't so easy to change your stats and I wish we could delete the default daily tasks. Maybe I can but I'm a dumbass. Idk	5
I love this app it's the best and keeping things healthy with yourself and I love it so much	5
This is a superb way to motivate yourself to do things. To create new and healthy/fun habits and get rid of bad habits. Do you want to live a life full of adventures? Be creative and install this amazing app. I would suggest a clearer and friendlier GUI but overall itS AMAZING.	5
Buggy as all hell. The advertisement is right. It gamifies tasks... But that's it. No tracking history of your habits. Inaccurate as all hell. Worst of all is you can't delete your account. They'll forever keep your data. I'm sure that's illegal in parts of this country and around the world. Definitely don't use your real email to sign up to test it out.	1
This is such a fun way for chores to be rewarded. My household is full of gamers, and this is a great way to create and maintain habits, as well as track chores on a daily, weekly, or monthly basis. They are great about getting back to users. They have real conversations, and listen to user feedback.	5
It's been helpful and very cute.	5
I really like so far. I makes my daily routine a bit fun and make it meant something in a way.	5
Ok I like it, but know what? The experience points keep expanding but not with health. Simultaneously, you will be sent backward everytime you lose your health while to refill health you need to max up the exp point. Please fix this	3
I couldn't change the language of this software, I tried it again and again, but the language didn't change.	4
These developers have done an amazing job with this app! No annoying popups, no ads, no bugs, overall a flawless experience for me. It's been four years since I've used it so I'm excited to get back into it!	5
Is there any ways to see your progress in graphic? Like daily task you've done and see it in graphic stats or something? Because i can seems to find one in the apps or did i miss something? I wsnt to know and compare my tasks daily. The UI and everything is good tho except for that graphical stats daily i cant find one here dev	3
Great app for encouraging you to do things! Love that you can personalise your own tasks and play with friends. Would love to see the ability to repeat tasks on weekdays/weekends, instead of just daily/weekly. And an Undo button would be awesome! Sometimes I'll mark something by accident and can't revert what hearts I lost, coins I earned, etc.	5
This game/app is so easy to use and so much fun. Thank u so much for making habitica!	5
Excellent way to gamify life to help motivate.	5
good	5
I love this game. It has helped me do much It's a bit of a learning curve. It would be nice if challenges were visible from the app in all of the guilds, and I would also like to see the last day and time that a habit was marked, because the colors don't always change and if you have a lot of habits it gets confusing. Otherwise, this app is brilliantly done and will be getting my monetary support…	4
Sem palavras, bom demais :)	5
Make a go back button	2
This has really helped me be motivated to get things done. Im really enjoying this app	5
Has helped me to stay engaged with my to dos in a workable and fun way. Love this app.	5
It's a delightful app that helps you keep on top of things. Personally, I've found that you get as much as you put into it. There are communities and challenges you can join with like-minded people to help you achieve similar goals, and their are seasonal events as well. There are no adds, no constant pop ups to buy gems, and all features are equally helpful without the gems.	5
Loving it. Would appreciate dark mode as well!	5
I've always been wanting one of these!!	5
Good	4
There are options to give your avatar a wheelchair, and there are a lot of colors to choose from, as well as a skinnier body type or a larger one... I don't use a wheelchair, but I just loved this option so much because I have friends who do and it really means a lot to them! So cute lol	5
Stopped	1
Engaging and effective. It doesn't seem to be possible to use a Google Play balance to pay for gems, though.	5
It's fun, a great concept, but the app itself needs work. It locks up constantly and has to be manually shut down and then re-started, and the reminders basically don't work at all. Honestly I think it would be best to remove the reminder feature for now until it can be fixed, because not having a way to set one at all is better than using the feature and thinking you'll get a needed reminder whe…	3
I like the app and it's a pity that I won't keep on using it because of the absence of monthly overview for dailies which I need most from a habit tracker instead of useless strikes	3
lol i went to settings, change character value, and got myself 9M coins uwu btw is that cheating...? I mean well its right there	4
It worked fine for a while, but now every time I click on a task/habit/goal to edit, the app crashes. I can tick off the task and plus on the habit just fine, but I can't edit anything now... Please look into fixing it soon? Edit: thank you, the latest update fixed it all!	4
Wonderful reminder app and Brilliant community!	5
Great for ADHD	4
Very good 🍀	5
Can't even start it properly. Just says "Path 'profile.name' is required."	1
Unfortunately i can not sign up or sign in. By google account or email. I tried a lot. From iran	1
Game is great, can give back results where you put in effort. However when I last tried to put in a task everything was empty and I cant seem to log back in.	3
This app has helped me a lot and is all in all one of the best apps I know. There's just one suggestion: I have many habits and dailies hence I have to scroll a lot. It would be amazing if there was an option to change the layout so you can have a better overview.	5
Great concept, but I can't even create an avatar. This is a constant bug listed in reviews. The company says that your selections should show up after you start actually using the app, but how can they when we can't even actually CHOOSE anything. I guess I'll try one of the competitors apps.	1
Excited to try it out, but the app crashes whenever I try to create or edit tasks!	2
This app is completely unusable on my Note10+ The account creation is riddled with errors and when I finally get into the app, I can't click on any items or add a new item without the app instantly crashing. I was excited by the premise and motivated to start using it, but the experience was downright embarrassing. I'd love for a developer response here to acknowledge these problems and maybe off…	1
It's a good app. It fuses the entertainment received in playing games with finishing chores, which is pretty hard to pull off. I'll recommend it to anybody who's trying a lot to change their life but easily succumbs to their desires.	5
The game is very buggy, I just bought a reward, then the app crashed, and the gold I've spent is gone, but I didn't receive the reward. These kind of experiences unfortunately decrease the gaming fun tremendously, and it could be such a good game otherwise!	3
Beautiful programme! I can recommend it for all my friends!	5
Mandatory registration	1
I've only been on the app for a small time and I can already see the ways in which it can help. Very inclusive and helpful	5
Love the idea of life as a videogame!	5
Love the idea but the app is so buggy and not too user friendly at points. First off, I can't change my character when creating an account because nothing pops up. It's just missing so I end up with a female characters. I have Galaxys10 and tried reinstalling app but nope, seems to be just a bug. Also, changing outfits just seems terrible to scroll through (the not user friendly part) The Good Id…	3
impossible to register, circle, circle, circle... and nothing	1
A great way to work on self-improvement with friends, hold eachother accountable, and have fun!	5
This is a good app to motivate, but wished there would be analytics to show progress like graphs, etc.	3
Was ok until i saw the mtx. I guess it truely does "gamify" things now.	2
I'm on the quest of improving myself, developing small good habits is pretty easy with this and using this app as a reminder for tasks is awesome.	5
Hebrew language doesn't work...	5
I've tried quite a few rpg-like to-do list apps and I must say this one is the only one that I find genuinely enjoyable, and actually kinda feels like a game. You can tell a lot of effort was put into the aesthetic, everything is very easy to access and is pleasing to the eye. Although I think there should be a way to uncheck to-do's. I keep accidentally clicking on them in the widget and remakin…	4
Gooood	5
Broken from the start, can't do anything	1
Doesn't seem to work on OP 6T, can go through character creation, but doesnt let me customize or select anything. half of the UI shows up blank.	1
Cant see my character	1
Would love love LOVE LOVE an offline mode. I spend 3 days a week without internet and have trouble keeping on top of my life without structure like apps like these. This would be the one for me if it could also go offline :(	5
This app is really unique. It has made me interested again in being productive. It's almost like adopting a lifestyle! However, the app is currently having a problem with task reminders. It doesn't work most of the time and when it does, the alert is usually delayed by approx. 10 minutes. Also, it would be nice if the developers provided the ability to make task lists even when offline. Other tha…	5
Could be better if it was completely free.	4
Despite various updates to "fix bugs" the first few screens of this app are still completely broken on Android. The app beyond sign-in still functions...but that's it. The game aspect is weak, the app isn't very well designed, and the tutorials tend to be broken on Android as well. I prefer apps like Fabulous, which I think approaches the subject of mental health and habit forming in a much bette…	2
Loved it	5
App has no images on S10+ and is completely unusuable	1
It's fun and easy to use.	5
Would love to actually get started with this app, but for whatever reason I can't even build my avatar. None of the options for selecting what I want my avatar to look like actually show up on the screen, they're all completely invisible.	1
So far so good, you have to be willing to set on the app for a bit to figure it out. It's a rpg game based off of truth. The app does freeze fairly frequently but you just have to close it and reopen it and everything is back in order.	4
As a Gamer This Makes Life Fun You can make a long of lists of your daily life and gain XP and rewards. You can hatch pets, feed them, ride mounts, find a party to run with, get cool gear, and go on quests. I can see where fun wise there could possibly in the future be expansions for more to come by all means, but right now this really helps to keep on track and makes it so I actually enjoy some …	5
Honestly it's perfect but theres just. One thing. I really wish you could set a habit for 'complete X times a week', it would be so useful. I have yet to find an app that is this good, but that is the only shortcoming. Please add this! I mean of course you dont have to but it would be amazing.	5
I like this app, and it's really helped, but now I can't open it anymore. It crashes while loading, every time. I've tried troubleshooting, restarting, deleting the cache, but nothing seems to work.	4
Looks good but lack of dark mode kills it for my phone. I can't stand any app that's mostly bright b white. Went with LifeRPG instead.	3
I was looking forward to using this app. But it wont even let me pick out an avatar. Things just go blank on the app and tells me I'm missing information when I clearly am not. What a bummer	1
Really interesting apps!	5
Can you give an option to set up timer for every task like 10 minutes or so, to make us more efficient? You can do it by giving us a button to start the timer and the task automatically gets checked once the time is up. And if somebody wants to undo then points will be deducted. Is it possible in any way?	5
Set up was glitchy. I didnt get further than that. It's a great concept though and the art is cute.	2
This been really working well with me. The community is great too. It's very useful and the widget is great feature. Though how about costumizing the app theme? Like using different color theme instead of the default purple. Because it will look prettier for my widget :D	5
App has many bugs. 1. Start screen doesn't display first 3 slides. User creating is totally not functional. I'm using both Android 9 and Android 10 same bugs.	1
Ok	5
It's a cool app. I have enjoyed using it.	5
Cannot log in.	5
The two starting pages were blank, same as character customization. I saw another comment and there's any new version to update. I was excited to try this app but I couldn't :(	1
Thank you. I love the app and it's helping me immensely already. The only suggestion I can think of is, I wish there was a way of keeping track of my previously completed tasks so I could look back on the progress I've made. It would feel much more meaningful that way and serve as additional motivation.	4
There are some things i feel need to be ironed out e.g. i found feeding the pets/mounts a bit buggy, but overall it has definitely helped me think more about my personal goals and how to approach them	4
Good app, but very buggy and support is completely unhelpful. There's no way to change your subscription level in the app or play store. Even if you cancel the app will think you're still subscribed. So basically when you pick a subscription level you are fully committed to it because the devs are too incompetent and uncaring to help. When using a choosing skill the habits n dailies show up like …	2
I am unable to create a new daily. This is the main reason why I downloaded Habitica. The error message says ' ' is not a valid enum value for path 'frequency'. Edit: The app works perfectly now. I've been using it for over 6 months without a single issue. This is the best self improvement app ever created.	5
Love this. This is a fun way to build your self up	5
I like the concept because I've been trying to gamify my free time for a while, assigning a predifined score to each habit practiced the most during every hour, and all I wanted was the positive and the negative habits to affect the same progress bar, with the possibility to keep track of a daily score, with a possibly negative value. It's a damn shame but this aint for me. I wish it was more cus…	2
I love this app!!!	5
This is a fantastic app with a fantastic community-- love this game :) Helped me start sleeping on time and drink water-- anything that you can imagine for yourself, it can help you do!	5
The first 2 slides are black and I can't see character in the character creation. Some message saying "path 'profile' required habitica...i hope this gets fix soon. Until then I I'll wait.	1
It is an amazingly helpful app I am currently a year 11 student and this has helped tremendously boost my productivity i have seen improvements not only in my results but also me as a person as I lost lots of my bad habits and gained good ones. HIGHLY RECOMMEND TO ANYBODY WHO WANTS TO IMPROVE THEMSELVES (non--academic/academic)	5
Love the app. Love the rewards. But, I wish that it showed you past dates and all you accomplished on days previous, and I wish that the coloring of tasks wasn't so complicated when getting close to red or blue or whatever. Also, certain things are hard to navigate... but overall, I absolutely love this app. Use it every day. Not so much for challenges or battles, but for habit making and to do's.	3
Blank screens when initially launching, character creation screen missing most assets but still semi functional. Unable to begin. Oneplus 6T A10	1
to be honest, i love this app, really useful and tackles productivity in a fun way, but since im traveling so much i cant have a consistent internet connection so i cant use it sadly, offline use would be so appreciated, even with less stuff to use, sadly i know that wont happen soon	5
The app didn't work for me at first, but after uninstalling a few times it eventually worked, and I love it! This is great for me as a college student because it makes keeping up with homework and assignments easier by adding an element of fun!	5
Love it...it has completely changed my life I couldn't have become more adult-like without habitica!!! 😋😊😋😊😊😊	5
Wont let me change my appearance so I'm stuck as a black female. The user interface is very poorly designed	1
I really love the idea this app has but it has some bugs. The first 2 pages are blank and when i had to make my character everything was blank too. After updating the app it was still the same. (Im using a samsung s8 if thats important) Hope you guys fix it cuz i'd love to use the app.	3
Completely unusable on Android right now. Everything is blank or not loading. Downloaded and deleted right away which is unfortunate because it looked like something I'd be really interested in.	1
If you're a procrastinator this app will change your life! I have a tendency to avoid the things I need to do by snacking or playing video games so this app has been perfect for me. I'm great at making to-do lists but suck at execution. This app has helped me with so many areas of my life, chores around the house, my quality of work at my job, I've even been using it to develop safer driving habi…	5
I absolutely love this app. First of all, it actually works and give me all the motivation I need to get stuff done. Secondly the community is awesome and there is just so much stuff to do! Recommended to everyone looking to develop habits.	5
It has been an effective motivator and tracker for me to accomplish the smaller tasks that get me closer towards my bigger goals. But there seems to be a Bug - I can't seem to receive a friend's Party invite, though I am able to create my own party and invite friends to it. It's a one way street in my app! Joining guilds and the self-care, self-sabotage info have been most educational and helpful.	4
This is a very creative app to keep me amused with my Versa 2 Fitbit and to keep me productive when doing tasks around the house. Excellent job creating this app keep up the great work!!Two thumbs up...👍👍😎🖤	5
The ios app is lot better than this. please improve it as soon as possible.	4
Best app for daily Routine but there are some issue such as you can get lot of coins and increase your level to infinit though settings. You should improve that because Some one donot get motivated for doing task when you knew that you can change your level.	4
I like the app a lot, but some features are a little annoying. I have a few suggestions. - More ways to tweak what the widgets look like (currently they take up a lot of space). - It would be nice to see the completed tasks together with active tasks instead of them disappearing. - Task subcategories! Please! 💚 - Biggest gripe: because of the way the entire list item is like a button, I keep acci…	4
I'm really happy with this app - it helps me stay productive, both in school and with my writing goals and even tiny things like just getting out of bed in the morning. I 100% recommend this to anyone who procrastinates as much as I do, because it's really helping me get out the hole I dug myself into with my bad habits.	5
The app is broken right now. Downloaded today to try it out and the first two slides were blank. Character creation is all blank. Unfortunately deleted but was looking forward to trying. This has been catalogued by others. When its fixed I'll try again but so far it seems that this app is only really properly supported for iPhone users. (I have a Samsung S9)	1
After adding task to the app, it just doesn't shows up.	1
I just want to say that the tutorial was too much info, things like this should be explained in a short and concise way, at a good pace. It was just too long and too much to take in. I didn't even try the app though, I can't say what rating it deserves. I am unnistalling but I may come back to it in the future, it's not you, it's me. (Also, you can't delete your account on mobile but you can on d…	4
The game aspect really does motivate me! Especially helpful for doing the dishes. There's a big difference between "I should do xyz" and "I have to do this or I'll lose health points, and I don't want my party to get attacked!"	5
Super buggy on Android, have to close and open constantly for anything to work.	1
My phone is a Samsung S8+. The introduction screen is mostly blank, and the character customization seems to be broken because your character and customization options don't show up. I didnt go any further.	1
It's been a good way to get things done, and the concept of an RPG is very well executed. The reason for 4 out of 5 is simply regarding the interface. My wife uses it on iOS and it is light-years beyond what we have on Android. Much cleaner, more useful information, and less clunkiness.	4
The concept is inventive, but the execution simply makes this app less than enticing to use.	3
This app is an awesome (and fun) to-do list! I like it a lot and it helps me out with my life and tasks every day. However, the app crashes whenever I try to sort to-dos by scheduled and it's getting a bit frustrating.	4
I refer to this app constantly. It feels super rewarding to do things and keeps me motivated to do the tedious stuff I used to procrastinate on. I love it!!	5
I love the idea but it's not working on my Samsung S10e. Like the main screen is just purple when I first open and then the features for designing my character didn't show any options. I'll happily try again once bugs are worked out. Keep us posted!	2
(Samsung Note 8)Surprisingly robust and easy to use. The game aspect is a nice bonus but the core productivity elements are what make this app awesome.	5
Pretty good app that helps me stay organized. Could use a few improvements but overall I enjoy it	4
Works great!	5
Habitica is awesome! Only thing that it's hard to feed your pets with the app.	4
Optimal Experience	5
Using the free version and already, I am hooked with how great it is.	5
couldn't create my avatar at first, but after that it worked fine.	4
App has been useful in helping me keep track of tasks and all, but lately the alarms I set on my dailies haven't been going off at all. Which is... unfortunate, because they're all to remind me to eat...	3
App broken, don't bother. Like many many other reviewers, this app is totally broken and defunct on Android devices and specifically Galaxy S10 / Note 10 devices. It seems the developer response to all of those reviews is "please report a bug" but this has now been an issue for months that they haven't looked into fixing despite dozens of notifications from users that their app is broken. I have …	1
A real life saver, ill be forever grateful to the team who made this app	5
Amazing app	5
Habitica always picks me back up when I crash and burn	5
Brilliant idea. You are making chores and tracking your habits and progress so much more fun!	5
Installed it and it glitched and didn't display many of the images on the 'create your avatar' page. Immediately Uninstalled.	1
Very nice personal todo thingie	5
I like this a lot! I'm getting my friends to use it with me :)	5
Doesnt work the main screen is stuck i can move to the next page.	1
Simple and rewarding. The updates are amazing.	5
1/5/20) I have tried the updates since my original post, and launch speed has slightly improved. Main Landing Page loads very slowly, but at least didn't crash right away again. Almost froze when scrolling through habits. I gave it more time to load, then tried going to a different section of the app & it crashed.. 11/9/19) Would be an awesome app, if it would load. Painfully slow startup and ver…	2
Downloaded this app hoping for a fun way to form new habits, but when I get to the register screen the first two tutorial panels are blank and then the third one lets you link social media accounts. Then I can't save the username and display name I create, and the avatar generator screen doesn't load any options. Opened the app the next day to find nothing I could edit had been saved. Uninstalled…	1
Innovative	5
Changed my life, great	5
Great idea and I'm enjoying it so far. Chores and errands are much more fun. My one gripe so far is that it seems like most items/quests cost gems, which are pay to play. I'm afraid i'll pretty quickly run out of free items/quests to strive for and then the app will lose its effectiveness. It'd be helpful if their were other ways to unlock gems outside of paying for them, like reaching extra high…	4
Just...No words!	5
Review as of 1/4/2020: This is a very great app. It is very useful and helpful, and the bug with some places not loading is fixed.	5
Same issue as Don Smith who wrote a review on 10/10/19. Will consider this app but the lack of slide visuals and character visuals makes the app in-op. Current phone is the Google pixel 4xl......perhaps I misspoke in regards to the reply. My issue is not with the visuals but the lack of visuals. Everything is blank for me so literally can not see half of the content.	1
Awesome app for gamers who need motivation to get real life tasks done lol	5
I love this application.	5
First two slides doesn't load, the character in character creation & menu items are invisible, pls fix.	3
Great App.! Run your life like a game. Works for me....👍👌☑	5
Love it	5
I love Habitica. I love the social aspect of it. If it didn't have the social media portion of it, I probably would have unistalled it as,soon as I installed it. The social portion of it gives me a, reason to check it, and reminds me to try and meet my goals.	5
A fun way too self check your own habits, smashing support staff help and guide you, you can meet like minded people who are sharing connections and fun in this quaint yet challenging game app. If nothing else I'm remembering my meds on time. Enjoy finding your fun habits see you in Habitica the adventure is there for the taking 😉	5
So far it's pretty good. I've been using it about a week. Sometimes it doesn't refresh, but the other users on the app seem positive and friendly. There is a lot that I am learning through users that isn't actually explained in the app. Like if you don't do all your daily tasks, the whole party takes damage. So yeah, no pressure! It would be nice for a better help options or a more detailed in-ap…	4
Galaxy S10 on Android 10. FTUE is busted. First two slides don't load. You get to the character creation and the avatar and all of the customize options are invisible/don't display. Please fix or mark the app as incompatible with Android 10.	2
Best habit app ever. Join a party for accountability partners and better experience.	5
Really nice app that is easy to use. Would be cool to see a feature where you can build things, like building a village and materials for this are acquired through completing tasks/habits	4
Doesn't show character customisation, think it needs an update	1
Interesting app	5
Not very user friendly and very less interactive	2
Boring and not very effective for me: the visual design is a bit of a yawn and it's too hard to earn rewards without paying. If it works for you, great but it doesn't give me enough gratification.	2
Path profile name is required glitch when trying to make avatar on Galaxy s10	1
Why take down show more or less function on Note after latest update version (Dec. 17 2019)? It's really useful.	5
I've always had such a hard time motivating myself to do things like chores. This app has made such a difference! It really gives me a sense of accountability. Highly recommend to anyone who just can't seem to get things done.	5
This is an amazing app. I've tried so many habit trackers and todo list type productivity apps. This is the only one that's kept me engaged. And the community is so wonderful.	5
So many portions of the app we're not appearing on the screen from the get go, including the first two screens entirely, and even the avartar selections.	1
I was using this app just fine without problems for about 2 months but when my wife decided to get us both a subscription, my account stopped working right. Whenever i check off a task i just get an error message and nothing gets counted. I did everything the helpers told me (clear cache, reinstall the app, restart phone) and nothing worked. Its been about a week and i have yet to hear again from…	2
Certain pages don't fit on screen.	2
A great companion app to the site for when you're on the go. Some interfaces are still clunker compared to the web, like hatching pets and the lack of equipment sorting, but the website will always be ahead of the app by design. It's disappointing how many people knock stars off this apps review, undeservedly, because they don't know that. The app is great for mobile, checking off tasks and check…	5
It helps me a lot because it is like a game.	5
It doesn't work offline and when I'm actually online I need also a vpn to use it :-(	3
The app's a bit glitch-y, not gonna lie, but it helps tremendously in my day-to-day life. The community aspect of it is amazing, I actually feel motivated by all the kind words. Good job, developers, my life's a bit less bleak now! c:	4
Busted from the start. On the first open of the app I got a 3 pane swipe intro and the first 2 were blank purple screens. Then, on the Avatar creation screen the Avatar wasn't visible. When finally getting in to the app the "help text" bubble didn't point at anything, just the bottom of the screen for the whole dialogue. This app sounded interesting but it seems there's a complete lack of interes…	1
Amazingly helpful app. Replaces any other to-do app. Has reduced my use of a list app, too. I'm already building better habits, reducing bad ones, and getting better at keeping track of my tasks, and I haven't even joined a team to fight monsters for rewards yet!	5
Does this works on android 10? I tried installing it and tried to make a character but it seems it's bugging. Doesn't show my character (from character-making phase). Reinstalled it, same thing occurred. Hopefully you guys can help me here. Cheers!	2
The to do list should allow prioritizing tasks by importance and urgency. It would be great if you could add that.	3
Had a great experience when I was using it thru browser but when i installed it on my phone, it wouldnt record all my progress and tasks on my phone application. Even with the same account. Please work it out, I would love to keep using thru my phone.	3
App didn't work at all. Was buggy from the start of my sign up where I used my Google account to login.	1
This app is good and it's useful. Yes it's true that it has a few bugs here and there but the app itself is good and I like it. I wish it had an offline mode because I can't stay on all the time but I can see why we need to be online at all times.	4
This app has really helped me get my stuff in order! It also has an active community and good challenges! It is a bit glitchy at times (things don't refresh, etc) but overall it's great! Edit: lol, the 'report a bug' is glitched on my phone :P I had to manually send my info over, in the middle of fixing a glitch where my day won't reset - been broken for a week.	4
Not very expressive frame for activity descriptions, must be in the first stages of development. Guilds look incredible diverse, very surprising it is a social app. Seems the leveling function is standard gaming and well embedded. Hope open sourcing it make it better fit. Passing habits to to-do would be desirable.	4
Would you quit directing me to the website!? If I want to join a party/guild it should be done on the app. It won't let me log in on the site AT ALL.. Why you people would choose to have it so if you use "log in using Google", it resets and begins a whole new account without asking, now I have two accounts on one email? It won't even give me my password! I tried resetting it several times. How an…	2
Want to like it. So far half of the set up items aren't even showing up for my samsung s8. All the purple screens are blank. Was excited to try but it doesn't work.	1
I'm easily motivated by things like points and streaks, so this app works really well for me to increase my productivity and decrease my anxiety. I use rewards for breaks, and find that I get unpleasant but short tasks done much more often, because I can earn breaks quickly by just getting them over with. I also get my long, complicated, multi-part projects done early. I gave it four stars becaus…	4
Awesome!	5
I really like this, however I'm not able to stay with it for long periods of time. This one and others I've tried and I just can't stay motivated....	3
I liked, but in my cellphone had some bugs (galaxy A8+). I think if this app had a function to sync with the phone calendar (google calendar or samsung calendar) it would be much better	3
Amazing! Props for the design and organization tools, i wouldnt change a single thing. I wish there were more creator like u guys that really care and pay attention to users needs 👏👏👏	5
This is an amazing app. I used to struggle to get anything done before I stumbled upon this wonderful creation.	5
This app has some major problems. It seemed to work fine for the first day of running. After the first day no reminders were executed. Any game armor or weapons could never be equipped. it appeared you could equip them but once you left the screen they become unequipped and they never showed up on the avatar. I mainly got this app for productivity and since the reminders do not work I'm not certa…	1
So glad I found this. Hope it keeps working the way it does, I just installed it. Just keeps getting better and better so far I absolutely love it :)	5
Based on the last fifteen minutes I can tell that this is going to be very exciting! Thanks for the brilliant idea!	5
I'm surprised, this app actually works for me! It helped me procrastinate less, but I also realised it works only if I remind myself to check the app a lot. I recommend it for those who have really bad procrastination problems like myself. Even if the game style of this app isn't your thing, it's a great to-do-list app for habits, daily reminders and general to-do items. Only complaint is it's gl…	4
I've been wanting a habit tracker that is fun and this definitely is. There are a few loading issues every so often, if those bugs weren't there I'd give 5 stars. All around though enjoyable, easy to use, and a great way to keep track of good and bad habits.	4
This app has lots of great things and options. It gives you a great sense of progress, by making you see how your character grows, and all options are free to use, expect by the customizations of your character which you have to earn. I really recommend this app, if you have a lots of habits or list of things you want to accomplish, the only downside is that it may have so many options that it ca…	5
I really like the concept of this app, the style, the features, and it has done its part in motivating my studies and organizing my life. However, the app needs some serious redesigning. The layout is difficult to navigate and the chat function is almost useless. The way challenges are organized could also use improvement. All in all, I like using it (make an account a month ago), but the functio…	4
It's broken. I try to create my account and I can't even use the name I want or customize my character. It's just broken. Nothing displays.	1
I have been trying to download the app but its just not happening. Please look into it.	1
would love, love, LOVE an offline mode as I don't have internet access at all time but adore this app to keep me on top of my life and mental and physical health	4
App is completely broken. Can't even make an avatar -- none of the options show up. Also, get an error message when trying to show a display name	1
Cute, but seems like it would benefit from a way to set eg monthly or annual reminders for bills and birthdays without going to a Google script.	3
Can this please get a feature where I can add tasks when offline and it uploads to the server whenever I connect to the internet. At the moment, it simply deletes everything.	4
Healthy, fun game	5
It looks awesome i hope it will help me build good habbits and keep track on my schedule. I wish it could be like a widget on android phone screen as well. And maybe we could write some quotes that motivates us we could see them as notification or something. i love the guild part looks like you can create communities and be part of them. I just download the app today and wanted to share my first …	5
I love this format, only thing that would make it better is some form of active side scrolling gameplay element, build your character throughout the week and then try to beat a level sort of thing	4
Please make this app offline as well	1
It's a cool app and it kinda helps me but you are forced to be a warrior. It says you can change your class in the settings, but there is no option.	3
Wanted to try this, but it doesn't seem to properly load images to create my character or load tutorial pages so I can't even continue from the create screen. Seems like it's broken...	1
Friend was permabanned for calling another friend a "mad c**t*" in party chat, but here in Australia that's a compliment... TL;DR over-sensitive language filter, should allow party chat to be unfiltered.	3
Will not open disappointed as i was looking forward to using this service	1
Can't log in. The password input is shorter on the in-app login than both the reset password field as well as the login form on web, so my correct password is rejected	1
Need Wifi/Data for it. I get that you can play with your friends, but it would be nice if I could use it without wifi for data anyway. I have a limited ammout of data and brain memory. So by the time I get home after all day I've forgotten my habits and the point becomes mute. Only gave this an extra star because I love the 8 Bit art.	2
It keeps lagging and dificult to select the traits i want for my character... ugh ! Not worth it UNINSTALL !	1
An option for smaller text would be realllly nice and distinguished, it's so big and bulky looking and only fits a couple habits per page. Fun and actually works. it doesn't have a history for or even track your habits tho........ but still best app ever!!!	5
Love this concept, love this app. I've been following the development of habitica since it was still only online & I love it! Plus there's plenty of active users to party up & chat with and the devs are always helpful & prompt!! My only gripes are that I wish I could change the colors of my tasks/habits (nitpicky I know lol) & maybe have a notepad area where I can keep habitica-related notes, lik…	5
Please add a AMOLED black theme or a dark theme.	5
This is a very helpful and fun way to get yourself in the habit of doing things. The Daily Tasks are a fantastic way to get your daily stuff handled and check them off within the app. You've got the ability to create To-Do lists with due dates and notification reminders can make it ridiculously simple to get even the most complex task completed. On top of all this, seeing your character earn expe…	4
The idea is wonderful. But a lot of tedious mistakes spoil the whole impression. For example, information is slowly updated even within the application, often clicking on a menu item is ignored. If you create a task without a title, but with a list, it will become closed for editing, just delete. Not all things are obvious. I had to read help to solve simple questions. Well, the old-school 8-bit …	2
Love the app! Easily modifiable for making good habits, daily routines, and checklists, and fun to do with friends. Thank you for the your response below: the link allows you to review your history (this has been very helpful for me in realizing where my weaknesses and strengths are). My last wish is to allow friends to see your tasks and completions (for encouragement).	5
Seems to have glitched out on me. When I put in my username and display name, it gave me an error saying "Path Profile.Name Required." Then none of the Avatar customization options appeared. I wasn't even able to start the third page when the app crashed. Reopening the app took me to the Dailies tutorial and now I'm sure I'm missing something. I have a Samsung Galaxy Note 10.	2
Amazing. Not only is this app cute-to-boot, but it's so easy to use! It doesn't largely focus on the character aspect, which I like because I'm mostly here to organize my life. Everything is covered: To-Do lists, Dailies, Scheduling; its so extremely customizable and in such a simple platform (that I dont have to pay extra for) Not only that, there is the community aspect! Its about holding yours…	5
It needs a better way to Schedule the to do list. An easy way to schedule your day, week and even month. It needs a calendar to see things with a bird eye view. I like the game thing, but it needs more functions and to be more practical.	3
Thanks for the quick work! Everything works now. I really do like this app and use it on the daily, so I'm glad it's working again	5
I really liked this until I realized that unfinished daily/repeating tasks get marked as done whether you complete them or not the next day. That makes it pretty useless for tracking tasks I need to do each week.	2
It really helped me make my life better	5
Can't set the username field	1
fun, cute, and motivating	5
A great idea, and the app itself has been improved a fair bit, but still a little bit too slow to respond to give five stars. Seems a bit like server congestion maybe?	4
App is amazing but ios version is so much better than android version. It has many other settings while this one lacks them. i hope this gets fixed so i can change my rate to 5 stars.	3
Não consigo mudar a linguagem, já fui nas opções e tudo mas sempre atualiza e fica no inglês.	3
Okay But I wish it had options to increase exp and stays for example when you read a book gain x intuition when you run x times you gain x stamina, etc etc and get rewards and level that way. Gives more motivation for doing those things.	3
Great app. Helps me get things done and work on building better habits. Even better when you have a party going with friends. Would be nice if the app had a dark mode that's my only suggestion. Keep up the good work!	5
Very cool app!	4
This app is awesome! I love it not only I'm creating healthy habits, I am also learning thru challenges, you get to talk to people and destroy bosses. Is really awesome. Plus I had some trouble connecting to the game and Alys responded to me quickly and also they fixed it. Shout out to Alys. You guys are doing a good job.	5
App is no longer functional. Cant even Start app without it malfunctioning. Cant change username or character. It was fine before the update!	1
I've been using this app for about a year now, I think. I love keeping myself accountable, and tracking what I'm doing and what I'm not each day. Lately, I've been getting push notifications for every single message that members of my party are sending in chat, none of which mention me. I've switched off push notifications completely but they're still coming through all the time. This is the only…	4
Disappointed. Had the app installed for a few weeks only, I was enjoying it and improving my life and suddenly it stopped working. I keep getting notifications saying that there's no connection, I can't log anything, and once I decided to reinstall again and again, I can't even log in anymore. The screen won't load and it never goes past the login/register screen.	3
Help in alot of ways and has been of great help. Sadly the 11/15/2019 patch I'm getting a connection lost bug, but I'm sure it will get fixed soon.	5
Downloaded the app and the server just did not want to connect and synch my to do list and habits. Gave up after 10 mins.	1
Good ideas but not well implemented. It gets tedious and boring after a while.	2
You need internet access and the server has to be up on their side for you to be able to access your to-do list. Server has been down today and I cant check off or edit my to-do list due to that. Going to be deleting this app. Most other to-do lists work offline.	1
I'm actually willing to pay for the app, just please get the server issue resolved. Seriously, charge one dollar for the app, get a bigger Dev team and resolve any bugs or server issues. The app is actually great aside from that constructive feedback.	5
I had really begun to depend on this app and was having fun. Then I downloaded the update. I now have NOTHING. Not even the IMAGE of an avatar, there's just NOTHING THERE. I have no experience, no level, no coins, NOTHING. I was having a really awful day and this was just icing on the cake. There was so much I put into this game. How can I remember all of the tasks I scheduled for myself? I am so…	1
All my tasks are gone and unable to load anything.	3
Makes creating habits super fun.	5
Love this app ☺ Devs always fix issues quickly, too.	5
Life-changing!	5
I downloaded this app today but there is a problem that makes me unable to see to-do lists,habits etc. I really want to use this app but I can't do it when I can't see the options. It would be great if you fixed it so I can use it!	2
Been using this app and website for several years now. It has become ingrained into my day and really does help to keep you in line with your goals. Honestly if you use this properly it could do wonders for you.	5
Great apps to organize and manage task and practice habbit.	5
The concept is great and it's a fun way to keep track of your habits. My only gripes are: -I wish there was a better way to see habit streaks. The number is cool but if we could see it on a calendar like view I think that would be helpful. You could miss a day and if streaks aren't set to reset the number remains unchanged. -Better explanation of the colors on streaks. I still don't know what the…	3
Life changing app for sure.	5
Ребят, конечно круто что вы сделали это в виде игры. Только вот, вы бы могли доработать такие вещи: - сбивается сортировка задач после выхода из приложения. Я хочу чтобы у меня постоянно была сортировка по не выполненим ежедневным задачам. - я закрыла прогу на вкладке "ежедневные задачи" . Хочу чтобы при повторном открытии она была также на этой вкладке.	3
Two bugs right at the beginning of registration. First two images didn't load on the three slides intro, then when registering my info, it moved to the next screen but gave a name error and I couldn't make an avatar. Not a good first impression. Just deleted my account thru the website.	2
Pretty good a little buggy with data for example i have more then 0 postive adds to eating 1 fuit and vegi also there should be a cap to tapping like a cap people can set or an option so that acidental tapping dossent happen other then this its a great app	5
I couldn't register , the circle rounds and rounds .. And nothing happens	1
Fun for university students The only problem is they don't order the tasks by date, do you have to be careful not to miss homework. Now that i think about it, it's actually a big problem for students using the app. It is fun, overall, and I do homework to keep my avatars alive. Think Tamagotchi	4
I love Habitica! It's a habit tracker and to-do list that actually motivates me to get things done via the gamification and fun social aspect. The world of Habitica feels like a supportive community of people holding each other accountable and helping each other accomplish their goals. Doing my daily chores is so much more fun when I turn it into a quest for magical potions and eggs!	5
Must download. The app is very much useful. It had helped me get on track when I wasn't in a position of self reflection.	5
The app looks interesting but it didn't work in my device which is a Samsung Galaxy Note9 , I couldn't see the introduction and I couldn't see my character in the character creation window it kept saying path profile.file is needed I don't know how to fix it	2
So far I love it	4
Amazing app. Some glitchy moments, but overall nothing too annoying. This app is so cool that I'm OK with some glitches because in a very short time its already brought so much value to my life! Brilliant idea to get you into good habits and out of bad ones. In my experience it actually works!	4
By far the best to do list, habit tracker, and productivity app IMO... But during in 2019 all apps has broken down to the dark mode.. I would love to see dark mode come to the android and PC version of Habitica since it has already updated on iOS!	5
Habitica is the best! It's so rewarding completing day-to-day tasks with this app. Your avatar can earn gold, equipment, pets, experience by completing the tasks you choose. Joining a questing party is fun because you're with others, holding each other accountable and encouraging one another. Participating in challenges is great because you work on specific aspects of your life, like positive thi…	5
Neat concept, just not for me.	3
Make your daily tasks more fun and meaningful by gamifying it!	5
Why it is not giving me notifications for dailies?	3
Fabulous tool for task management by those organizationally challenged. For five stars it would need to include a calendar function.	4
Fantastic idea!!! I've actively been seeking something just like this for a long time. But the app itself is super glitchy. Most things wont load and everything keeps resetting. It might be my connection or my phone. I'm not sure. Hoping I can figure it out cause I love this!	3
Fun! I love the guilds even though some of them are dead :( anyway great todo/goal app thats disguised as a fun rpg game! :3	5
Beyond the social part, here we have the best way to take a good habit. Because at each "bad habit" you lose health. Same if you don't check a task (daily or to do) to say you did it. And you do not want to lose health. I don't know what happens when it comes to 0 but I do not want to test it. Actually I had another app for habits. It didn't works like Habitica do !	5
Can't even log in. Seems to stop working or freeze up every time. Just downloaded the app for the first time, can't make a new account or log in. Waste of time, will be looking for other apps that actually let me get past the log in screen.	1
I love this app! It is really well done and it really does motivate me to get my tasks done!	5
good app but skills glitch out all the time.....fix this for 5 stars	2
######please make offline version because most of studious people cannot afford online apps so if you want good ratting please make part 2 offline	3
App was crashing on my phone and unplayable now everything been corrected an app is amazing!	5
I like this app but this is the buggiest app i ever had i been using this for years and still havent fix them	3
Super glitchy. Too frustrating to bother trying to use it.	2
THIS IS THE BEST APP EVER. I am a very procrastinative person from a long time ago, so I decided to improve my life. I suffered so much because I did things I didn't needed to do in the wrong time. But Habitica was there to help me rewarding me to use my time wisely :3 THANK YOOOOOOOU :DDD	5
After uninstalling, reinstalling, and resetting my password the app works once again. That being said it's a great way to manage to do lists. I highly recommend it.	5
It's completely broken, things don't show up, error codes from the very beginning, it's just broken	1
Have been looking for a way to incorporate the elements of gaming into making progress "In Real Life". Even tried inventing something for myself but paper tracking was a nightmare and having it in this app is just fantastic! Really like it and it has made a big difference! The only reason I took it down a star is because it depletes my phone battery really fast if I am in the app for very long, s…	4
I wish I could control the reminders for my tasks more. Like the volume or what noise it makes. Other that that the app is great for keeping track of things that need to be done.	4
I'm probably too old for this. Couldn't find the energy/patience to work out how it works (and why was it preset with meditation?), I guess it would seem obvious to someone who uses technology more. Bought a huge paper planner called Trigg instead. Less portable! But it won't crash, malfunction or lost if I break my phone...	2
Great idea, it needs some improvements imo. Edit: after playing for a while i noticed some things that definitely need improvement. Faster loading times when changing sections or when receiving items, you shouldn't have to refresh to see them. That also applies when feeding pets where i dont see a progress in the bar unless i refresh. Etc.	3
Perfect	5
Ive had this app before and it didnt really help me then, but I'm using it again with much better results already after just a few days. I normally don't write reviews, but when I started having issues from basically accidentally setting up two accounts, i ended up sending a bug report and got it all situated by the end of the day and without losing any of my progress. Super happy with the help i…	5
I've been looking for a habit like tracker via google search, not really knowing the term or if an app really existed. Once I found what I was looking for, Habitica showed up. I installed it to my phone, looked up a YouTube video of it, and began using it. Now I'm hooked and 12 days in getting my life straightened up. Cleaning house, doing daily chores, and doing things I usually hate doing. Habi…	5
Great concept, but really quite bad execution. With so many bugs even in the new player introduction it feels like an early access, not v2.2 of anything. Surprised to learn that it's been in public release for 4 years now. I would be ashamed to make or spend money from any transaction within this game. I'm not usually this harsh, and I hope none of the devs take this review personally, but get it…	2
Can we please be able to mark equipment pieces as favorite so that they're easier to find?? Same with wallpapers	5
I'm so glad I started using habitica, even though its been less than 3 weeks its making such a huge difference. Got a sleep pattern and a regular routine with things being added in without a problem (whereas before I couldn't even do, let alone stick to the basic things I added at the start). My attitude towards doing things has greatly improved to and I actually feel like a better version of mys…	5
The whole app is pretty broke on the note 9 (edit: I would love to report the big to help however, the settings menue does not work so I do not have the ability to send a report).	2
I never ever leave reviews but this app is just so great that I had to! I've been searching for an app that will keep everything organized. This app low-key changed my life. 😂 It''s much appreciated.	5
Every other month, I think I'll do better. I try again. I download this app. Everything gets back in order, so I uninstall it to free up space in my storage. Then I relapse. I download the app again. This is a never ending cycle of desperation, loss, and hope. I will always download this app. I will always uninstall it. 9/10 would recommend	4
A suggestion: the search option given at the top helps to search any to dos , dailies or habits but it only matches the string from start. I would suggest that it should filter all tasks which contains the searched string as at times we don't exactly remember the title of our tasks how we created and we just remember the keywords.	5
Enjoying the app so far, but the widgets are quite limiting. You cannot use check lists in the widgets, and sometimes they update rather weirdly. I have also had UI bugs throughout, but they haven't affected me too much. Overall good, but just needs some tweaking to make it more solid. That's not to say the service is bad. Just the mobile app.	3
As soon as I downloaded the app and made a new account, I couldn't create a new character because under the body, skin, and other options to make your character was blank. When I changed my display name, I got a weird message for 'profile.name' required. The randomize button didn't even work for me either. I left originally because there were many bugs with to-do's and other things and I'm not co…	1
Great way to keep track of everything you need to do, habits, daily goals. All in a gamified format with virtual rewards and punishments based on whether or not you complete the goals you have set for yourself. If you join a party, then your success is tied with others and your failures to. Which is added accountability. I highly recommend this app.	5
Love this app. Its helped me with my motivation and procrastinating. I've been more motivated since using it. But I'm having a very frustrating issue that is driving my OCD insane. I try to move a task in my list... Only for it to disappear or move itself somewhere I didn't tell it to go. I try to keep my list in a certain order of how i should get things done and this is not helping me at all.	3
Разработчик исправил ошибку, которая не давала начать и оказалось, что приложение довольно хорошее, но:Режим испытания - бред. Кто-то его использует по фану и исход решает рандом. Кто-то пиарит свой ютуб канал.Так же, нет приоритизации сложности целей.Т.е кто -то поставит сложной целью написать диплом, а кто -то сходить в магазин.Дорого,в игровой валюте, стоят квесты. За неделю так и не получил. …	4
Habitica has less features than others habit tracker, but makes habit-making process more fun and interesting. Cooperation and common responsibility bring a real (or not so real) punishment because you're not want to let your friend or team fail the quest.	5
I love it. But the app keeps crashing when I try to invite friends to party and I can't buy gems.	3
Absolutely awesome for keeping you focused on completing habits and chores. Really does motivate me to do things like brush teeth, or cat litter.	5
I have been using Habitica for quite some time now and i must say, it has been the most useful in helping me establish a structure to my day. HOWEVER, the To-Dos are very limited in its functions. It's hard to implement a full task management (such as GTD methodology). It pretty much only supports next action steps, not any layers such as Projects or Waiting For. Also, syncing across devices can …	4
This app changes my life 😊. I was Never persistent like now .	5
I kept getting empty screens when opening the app, so I pressed skip. Filled out the registry info and was taken to character creation where I couldn't see my character or the build options. I could select things like body or hair, but nothing appeared relating to that.	1
Fantastic App!!!	5
It's good but a little buggy.	5
Such a cool app! I'm in love with it! Sad that it doesn't work properly offline though :( also has bugs	4
Dnd for you life	5
I needed this in my life	5
I really want to use this app, but on my Galaxy S10, the first 2 of the 3 slides in the introduction before logging in, are blank. The character visuals on the character customization are invisible, and on the settings menu, I scroll down and the options start to overlap each other (hard to describe). I will consider reinstalling after the graphical issues are fixed because it seems like a great …	1
I've been actively using this and I love the concept. App version could really use a new UI. Dark mode would be appreciated, and maybe letting users adjust Font or size of boxes. (Feels too large right now. It would easily hold more details, but space is lost to a big box)	3
Major issues need all email so I can send you pics pixel 2xl	1
I immediately encountered a problem when I began, by misclicking on one of my Habits. There's no way to correct for that. Manually change the values, yes, but the xp and hp don't change to reflect that automatically. Secondly, the settings page is broken on my S9, and the issue is difficult to describe. The display freezes so if you scroll, an instance of the text moves while the another is stuck…	2
Quite good	4
Apps been broken from the moment I download need fixing	1
Amazing app. Best of its kind.	5
It's a great start to improving your life, but it's more or less just a planner app!	4
Depois da última atualização o widget de stats parou de funcionar.	5
It miss my data after updating.i can't use it easily.	3
Laggiest experience ever, icons were missing everywhere, it seemed really cool but quite unplayable for me.	2
This app had changed my life. It keeps me wanting to be consistent in my positive life goals. Plus I've always loved rpg games so it's a perfect fit for me.	5
I like this app it keeps me productive and helps me develop new habits, but the app is so buggy sometimes and it's annoying.	5
Incredible app. Fun and motivational.	5
I use this for everything from gardening schedules to household chores. It's a really fun and adorable way to stay on top of tasks, and I've met some really cool people along the way, too.	5
Great productivity app. Well done. Many features. Easy to use. Beautiful interface.	5
Decent app. Fun concept. Biggest issue right now is that some of the dailies that are supposed to be once per week are still showing up as an every-day task, which is very annoying. Sometimes the dailies will cross over into the to-do list for an hour or so at a time, too.	3
The app is great except for being internet dependant and lacking an undo button or a button lock for unintended log entries I know there is an edit your character section but there is no record of past entries to use as reference	3
Changed my life	5
Its a very good game and I like it but to buy most things in the game you have to get gems or a subscription which you both to pay for. Also I don't seem to get anything when I purchase the enchanted Armoire.	3
Came back from the dead (me) great interface. Such a great update. Its SLICK AND SMOOTH very mobile friendly.	5
Amazing app but the extremely buggy ui have made the app irritating to use and sometime unusable without a restart.	4
Nothing loads up. Probably a bad glitch	1
--Update 2--: Okay, I think I have figured it out. The app doesn't sync with the servers on my WiFi, but works fine on my Data connection. Weirdly enough, the web version works on my laptop using the same WiFi. Please fix. --Update 1--: Reinstalled app. Apparently login with Google is completely broken. Not working at all. That's why maybe the data is not syncing? --Original--:No data loads upon …	1
(Now very stable thanks to developers efforts) Best life improvement app but after so many versions still buggy...	5
This has really helped me maintain and form habits better than any to-do list or other efforts I've made in the past. I love it	5
[truncated: 204,886+ more rows]
