# Supplementary material for: Toward an autism-friendly environment based on mobile apps user feedback analysis using deep learning and machine learning models
Source: PeerJ Comput Sci. 2023 Aug 9;9:e1442. doi: 10.7717/peerj-cs.1442 (PMC10495947; doi:10.7717/peerj-cs.1442)
Supplement: Supplemental Information 2 [file peerj-cs-09-1442-s002.xlsx]

## Sheet: Feuil1
	reviewId	userName	userImage	content	score	thumbsUpCount	reviewCreatedVersion	at	replyContent	repliedAt
0	fe96af2f-4f85-443d-824a-f9c6e2cb8ea5	Ooga Booga	https://play-lh.googleusercontent.com/a/AItbvmkY8YiMPxBWfbqDoydTgAEW34Ph54HlqhQhHFMs=mo	This app can be very motivating. It would be nice if there was a way to check off a task for more than 1 day. I use the app as a reminder for my chores, but I don't need to do all chores everyday. I'll forget whether or not I have done a chore, so it might get done twice or not at all. Of course that's my personal problem lol, but if I could check off a task for more than one day, it would help t…	5	0		2022-08-04 16:25:20
1	54b09497-5912-4535-ac16-33003a5f34ad	Min Htut Win	https://play-lh.googleusercontent.com/a-/AFdZucpFKwUKFFN3nnDfXTnSpYR6TWy6N1JXZ9Qyv12nsA	great app. but there is a sound problem. i cant hear anything on my phone even tho i picked audio themes	4	0	3.5.4	2022-08-04 09:49:02
2	c5468935-124e-48c0-aaa0-82c9b8d5059f	Cody Harold	https://play-lh.googleusercontent.com/a-/AFdZucoLLK9x4qncmKXZE9rMeuFVsojbMR3tt5xW9Hns	Just downloaded yesterday, so far so good. I just wish I could customize the date options a bit more. For example, I would like to do a task 2-3 times a week, and the only way I can currently put it into the habit tracker is by selecting the specific days to do the task on, which isn't realistic for me. I'm also using this for cleaning tasks, one I'd like to do biweekly, which also isn't an optio…	4	1	3.5.4	2022-08-04 03:41:44
3	0bb2d95f-76f3-4185-b907-1ac3223d7582	dan villanueva	https://play-lh.googleusercontent.com/a-/AFdZucopVtUEdsEctH7lvbKufzwE4rK0VZVlccjsQoUPxg	The app has a potential! It will be nice if the app works even you are offline and will just sync when the internet is available. Thanks and have a great day!	5	0	4.0	2022-08-03 14:31:39
4	a294d0b1-0ed4-4118-85b5-af2b31a2daf6	Jonny Shaw	https://play-lh.googleusercontent.com/a/AItbvmnnk8w2RdThIMSRJ1Rw8P6voGKSdiLwsjP3ppNvRA=mo	Really enjoyed Habitica. I've used a few of the habit apps now but all seem to fall short in crucial areas. I think the actual layout is exceptional on this, once you get the idea behind habits, dailies and todos it becomes so quick to add things in and is definately one of the easier apps to maintain. The gaming aspect is fun and does make it more interesting a draw. My main niggle is that there…	4	0	3.5.4	2022-08-02 05:51:15
5	5829abf9-6545-457f-9831-3cbe5fbfd35e	EXO Neil	https://play-lh.googleusercontent.com/a-/AFdZucqulwF9r7pWH9UIskrK16HCF9YgLHTZj7fzuaLi	Can you make this Offline	3	0	3.5.4	2022-08-02 04:31:01
6	1d6a533c-3c82-4901-833e-107783c60a60	Math Taupo	https://play-lh.googleusercontent.com/a-/AFdZucptKhPnL24vQorex-QXyQQyZISa6sJJqeW2vXYf	This app is great, I just want to request an update that would keep me tracking my habits and dailies even I am offline. Also, I would also love if you improve the widget version of the habits so that it wouldn't need much space in my screen just like the widgets in "to do's and dailies."	5	0	3.5.4	2022-08-01 13:30:10
7	d40111cd-5983-4297-9258-86a7f3834314	Ultra Gaming	https://play-lh.googleusercontent.com/a-/AFdZucpPbI710DYrn8a9yYSMYrfMcmqTa3a1bJ6gYYJ1	I love this app, doesn't encounter any bug yet. There is one thing that I think will help the user experience even more. Instead of streaks, why not have a statistics like data such as line graph to see the fluctuations of a non-linear progress of a habit.	4	0	3.5.4	2022-08-01 13:13:49
8	3a9ac29a-32c0-4987-8db2-e8a69ed7e68a	Nasim Faridnia	https://play-lh.googleusercontent.com/a-/AFdZucoZ_KTXEzRirZkRXzG6zk-z4nlxpuf_qAwLJaSjTw	I've had the app for more than two years. The quest feature is great for staying motivated. The to do list widget and support of markdown are also big advantages. I wish there was a better feature for getting an overview of how we've done in a week, like with charts and graphs. Another suggestion is adding a Pomodoro timer for each task.	4	1	3.5.4	2022-07-31 17:46:06	Hi, Nasim! Thanks so much for your review. If you’d like to share any feedback with us directly about an overview feature or timer for tasks, you can do that via Menu - About - Support - Send Feedback. You may find the Data Display Tool one of our devs created helpful: https://oldgods.net/habitrpg/habitrpg_user_data_display.html	2022-08-01 00:41:56
9	23f53f62-284c-438d-8e43-819121c6b9dd	Noni Alfiyana, S.Hum.	https://play-lh.googleusercontent.com/a-/AFdZucqoPIWNKMgnKs8UOBVS6cm2LOaLMtI0Gi_HUAgReA	Please make all tasks in to-do can be archived, not only the last 30	2	0	3.5.4	2022-07-31 17:21:40	Thanks for your review and feedback! We now have an official suggestion and comment form to help us keep track of what features users want the most. You can find it via Menu - About - Send Feedback if you’d like to add your ideas.	2022-08-01 00:45:38
10	7d9dae35-3caf-4aed-aaac-5ebd2bce715c	Allen	https://play-lh.googleusercontent.com/a-/AFdZucoHjXaYMJravStCBadS_FVdKkTIr4P6KSIBMbTb2uc	great.	5	0	3.5.4	2022-07-31 14:45:40	Hi, Allen! Thanks so much for your review and rating. We're happy to hear you think Habitica is great! If you’d like to share any feedback with us directly, you can do that via Menu - About - Support - Send Feedback.	2022-08-01 00:47:10
11	f3f1bd23-8965-4aed-a7e6-2319009efce6	wawan wawan	https://play-lh.googleusercontent.com/a/AItbvmnpmiy8gBasQoEQFK57aXDsi-JQp2JqVaDS6H9p=mo	Teu tiasa backup pdf csv	5	0	3.5.4	2022-07-31 14:44:39	Thanks so much for your review. We now have an official suggestion and comment form to help us keep track of what features users want the most. You can find it via Menu - About - Send Feedback if you’d like to add your ideas about having backups in pdf or csv format.	2022-08-01 00:48:09
12	a56fd4f3-9723-4093-9f97-30c756191ad9	Michael Cordon	https://play-lh.googleusercontent.com/a-/AFdZucpgT6IrFfUFnTV1VjqNbXR7HLGwXhr29OwuRZaR3w	I only tried it for about 10 minutes but I hated the sounds. That's the main thing i wanted.	3	0	3.5.4	2022-07-30 18:33:10	Hi, Michael! Sorry you didn't like the sounds. You can turn them off in your settings, but if that still doesn't meet your needs at this time, we understand. Thanks for giving Habitica a try!	2022-08-01 00:49:25
13	eabe2eb4-229a-48c4-b41e-b5d23549fbc3	Rama Danti	https://play-lh.googleusercontent.com/a/AItbvmnEFUCoM9L1ltQFp8jdj_F7D0qQAUGJIcK6yjjf=mo	A really good app for planning to do list and future goals.	5	0	3.5.4	2022-07-30 11:57:39	Hi, Rama! Thanks so much for your review. We're happy to hear Habitica has been helpful for you! If you’d like to share any feedback with us directly in the future, you can do that via Menu - About - Support - Send Feedback.	2022-08-01 00:51:01
14	b1ae83d8-6e15-4f14-8a40-2910ab3c8f06	ashley pain	https://play-lh.googleusercontent.com/a-/AFdZucp5NNl_WLfJctBOfTqmZxdILPZPLtuvu18njcVHAA	Started great! After a few days the notifications completely stopped which after going through the trouble of adding in reminders and to dos at specific times is quite disappointing. Great concept but sadly needs more work	2	0	3.5.4	2022-07-30 07:55:16	Hi, Ashley! Thanks for using Habitica. There's a support ticket open right now for fixing notification sounds, so we're hoping to have that fixed as soon as possible. You may also have better success by closing and restarting the app.	2022-08-01 00:51:50
15	e1240b67-1213-434e-b481-833c4a38d821	Daniel Martin	https://play-lh.googleusercontent.com/a-/AFdZucpW3gdfuZ01aykQKfgnMEKtE2hJWV4wplsXj7RC6g	There's no good way to set up a task that you want to do once a week but on any day. You have to specify a specific day and you lose points if you don't do it on that day. It's sort of mind-blowing that this feature doesn't exist, as it seems very basic.	1	0		2022-07-30 04:30:09	Hi, Daniel! Thanks for your review and feedback! You can add a task in your task list (instead of your dailies list) and check it off any time throughout the week to earn points. Tasks are ongoing or anytime things you want to accomplish. You will not lose points for anything not done in your tasks list at the end of the day.	2022-08-01 00:56:02
16	e32f5be9-0a19-4062-93ef-22c2a72e671e	beta Media	https://play-lh.googleusercontent.com/a-/AFdZucqVM_lB0I2B9HBfFXZvtG5wQiN5NlRRJmpA3Gm2VQ	Love this app so much! it's better than other apps which let you only add 1-3 tasks then ask for monthly payments to add more.	5	0	3.5.4	2022-07-29 06:31:46	Thanks so much for your review. We're happy to hear Habitica has been helpful for you! We are committed to keeping the useful functionality free and add free for our users. If you’d like to share any feedback with us directly, you can do that via Menu - About - Support - Send Feedback.	2022-08-01 00:56:51
17	18b07d15-9993-494d-9982-54156f2680ad	Surya Ashwadh	https://play-lh.googleusercontent.com/a-/AFdZucoWa8x9-FED_v9DLmvPyMm5g_18RFYPCWfD4ky5tS8	This is literally the best todo list and Tasks app ever. Delivers 100% of what it promises.	5	0	3.5.4	2022-07-28 19:31:28	Hi, Surya! Thanks so much for your review. We're happy to hear how much you're enjoying Habitica! If you’d like to share any feedback with us directly, you can do that via Menu - About - Support - Send Feedback.	2022-08-01 01:00:24
18	e0e5efed-395c-408d-8cab-4f0dfd9bee1e	Snoolf	https://play-lh.googleusercontent.com/a-/AFdZucoSG17V3zOp_iiueHkY_hjuJsq3t3etjhHQbyX0jA	It is very good but need to get more analytical with the habits, daylies and to dos... More statics please!	5	0	3.5.4	2022-07-28 14:05:16	Thanks for your review! We’re actually working on graphs and stats right now and hope to add them very soon! In the meantime, you may find the Data Display Tool one of our devs created helpful: https://oldgods.net/habitrpg/habitrpg_user_data_display.html	2022-01-07 19:01:37
19	719e2f5b-5d79-4ff2-906b-4cd7b4f2905c	Angela Chu	https://play-lh.googleusercontent.com/a-/AFdZucraZ6g2iBsqNFDXM0sdnE_3ERXkbpFGVb4tSP0RKfI	So much fun! It sucks that you have to pay for gems but there's a lot that you can do without them. This app has definitely helped me get my life back on track.	5	0	3.5.4	2022-07-28 07:02:08	Hi, Angela! Thanks for your review! We're glad it has been helpful for you. Regarding gems, all items that can be obtained with gems are cosmetic. There are also a number of ways to earn gems without using money- you can read more about them here: https://habitica.fandom.com/wiki/Gems#Obtaining_Gems_for_Free	2022-08-01 01:02:00
20	ea7fd60b-d7f2-4b58-a939-3cbf0447eabd	Brook Richardson	https://play-lh.googleusercontent.com/a-/AFdZucoKuPsxCIhl_k2or8T0wOwBszpttSRQQuV9hp7nrQ	Good for people who want to develop daily habits. Not so good for weekly habits.	2	0	3.5.4	2022-07-27 21:05:29	Hi, Brook! Thanks for your review and feedback! You can set a daily to repeat each week, if that's more useful for you. You can also use your tasks list for items that can be completed any time within a day, a week, or a month. You can also send our devs feedback using Menu - About - Send Feedback if you have suggestions.	2022-08-01 01:04:29
21	b3fcfabc-fb29-4ccd-9283-452010794e23	-Poison Ivy-	https://play-lh.googleusercontent.com/a-/AFdZucqlnR2I205FFNradMr1EIrIUG_W0XBzhNX00oy0dg	Helped me so much. I'm keeping this forever. It's helped me be more productive and live a better life. Thank you so much!	5	0	3.5.4	2022-07-26 21:12:44	Thanks so much for your review. We're happy to hear Habitica has been helpful for you in being productive! If you’d like to share any feedback with us directly in the future, you can do that via Menu - About - Support - Send Feedback.	2022-08-01 01:05:28
22	58d1f010-29d2-4e9d-98a7-26c9d742b938	Ailen	https://play-lh.googleusercontent.com/a-/AFdZucrUw_XlpeegAhI6-CosOYZcf8cZjTykeTRR3a36OeE	It's a nice concept, but there's too much information given at once for setting it all up. Might try it again in a while though, to if it changed	3	0		2022-07-26 07:41:20	Sorry to hear you’re having trouble learning to navigate Habitica! You may find the resources at Menu - About - Help and FAQ helpful. There's also a wiki that might help answer questions: https://habitica.fandom.com/	2022-08-01 01:07:54
23	ef7838d3-0286-4590-887d-9d9902d950d5	Abigail Joyce Huerte	https://play-lh.googleusercontent.com/a-/AFdZucpUeOwQ2UUTQGufRCD71fRxrZe_Na1q4yfMHA659A	These are good for kids who are turning to adults. Making the "real world" still fun to live in.	5	0	3.5.4	2022-07-24 08:46:59	Hi, Abigail! Thanks so much for your review. We're happy to hear Habitica has been fun for you! If you’d like to share any feedback with us directly, you can do that via Menu - About - Support - Send Feedback. Happy adventuring!	2022-08-01 01:11:15
24	043b766f-fd5e-47f1-88b6-3498240d60d9	Reuben Roy	https://play-lh.googleusercontent.com/a-/AFdZucp6UFj-U02peeB766e8AIJMRiSg-hSEIDaR7crijGQ	An incredible app Great note taking features Great at gamifying tasks And you can add code to extend features Not that you'd need to	5	0	3.5.1.3	2022-07-23 16:46:49	Hi, Reuben! Thanks so much for your review. We're happy to hear Habitica has been useful for you! If you’d like to share any feedback with us directly, you can do that via Menu - About - Support - Send Feedback.	2022-08-01 01:11:50
25	cda035e6-3131-43c0-bc70-621c446d8dca	Adrianne Hipolito	https://play-lh.googleusercontent.com/a/AItbvmkGP91GyaU5J-Bjm05dvceB-sezWshSk90LKbFM=mo	Can we have much more difficult bosses. Most of the bosses do around 4.9 damage for an entire day and that is pretty underwhelming, when you commit to a boss your commiting to finishing more tasks and completing your to dos more often, maximise the amount of damage you can do so you'd get a reward and feel satisfied. But when it comes to most bosses they don't pose an immediate threat, its underw…	3	0	3.5.4	2022-07-22 16:41:22	Hi, Adrianne! Thanks for your review and feedback! We now have an official suggestion and comment form to help us keep track of what features users want the most. You can find it via Menu - About - Send Feedback if you’d like to add your ideas about increasing boss difficulty.	2022-08-01 01:13:15
26	88102ebf-017a-470e-bc28-e66dac3b7a49	Raj Singh	https://play-lh.googleusercontent.com/a-/AFdZucoHrQeQAEB24w8dC1itOAE9utaOU_KTZyCQNjY5CA	Nice for a gamer procrastinator! I accept the Challenge.✌️	5	0	3.5.4	2022-07-22 02:58:46	Hi, Raj! Thanks so much for your review. We're happy to hear Habitica has been helpful for you! If you’d like to share any feedback with us directly, you can do that via Menu - About - Support - Send Feedback. Happy adventuring!	2022-07-22 12:28:03
27	12aa6939-204b-40ac-baaf-f18f63678066	Creative Mode	https://play-lh.googleusercontent.com/a/AItbvmnfFTvpIRyabZ0ewOVMTZA8vABcbbABIa9qZkw1=mo	It's really fun and has done wonders for the things I have wanted to do. Even if you are not into the gaming,.it just keeps the things you want to do in one place. I love it.	5	0	3.5.4	2022-07-21 04:09:53	Thanks so much for your review. We're happy to hear Habitica has been both fun and helpful for you! If you’d like to share any feedback with us directly, you can do that via Menu - About - Support - Send Feedback.	2022-07-22 12:33:19
28	2ff191c6-94ff-441e-8875-daf9cf213eb8	trenton bruton	https://play-lh.googleusercontent.com/a-/AFdZucq7BT0XZj9VsNu-JntZT7rDqYBIyFFqIof_SC6n	Eh	3	0	3.5.4	2022-07-20 23:22:20	Hi, Trenton! Thanks for your review. If you have any suggestions about how we can improve your experience, you can contact us directly any time by going to Menu - About - Support - Send Feedback.	2022-07-21 01:22:16
29	f0a5a76c-b48a-46e3-b5de-4d185086348e	I Wayan Adi Sudirtayasa	https://play-lh.googleusercontent.com/a/AItbvmmz10g-EtuLek_V6wyYUHzFgWpTUtUlFX4_6PY6Pw=mo	I love this app, enthusiasm for all developers in developing this application! 🔥	5	0	3.5.4	2022-07-20 10:33:43	Thanks so much for your review. We're happy to hear how much you love Habitica! Our developers appreciate your kind words. If you’d like to share any feedback with our devs directly in the future, you can do that via Menu - About - Support - Send Feedback.	2022-07-21 01:23:15
30	366d9e38-9f82-454b-9794-789ec62af6a6	Sintya Cindyani Fatika	https://play-lh.googleusercontent.com/a-/AFdZucpjAanzOsyUd5x9JSN9hRRe42joniEV4obUQaxoXg	useful	4	0		2022-07-19 10:25:40	Thanks so much for your review. It means a lot to us to know Habitica has been useful for you! If you’d like to share any feedback with us directly, you can do that via Menu - About - Support - Send Feedback.	2022-07-21 01:25:20
31	c91703d2-3fd0-4e6e-be6b-c7e281e2dca6	Shahil Magar	https://play-lh.googleusercontent.com/a-/AFdZucrdd5B_vxkt6x0RIoknj5nhYASMGwjEfaA5LApDiQ	Great concept but can be gamified more.	5	0		2022-07-19 06:59:21	Thanks so much for this thoughtful review! We're glad you like the concept. Habitica is primarily meant to be a productivity aid, and the real excitement is the improvement you see in your real life as you accomplish tasks in the gamified interface. We'll keep your feedback in mind for the future!	2022-07-21 01:26:39
32	4779ef7d-cad0-4f8c-a017-5a827aad05b8	Enzo P	https://play-lh.googleusercontent.com/a/AItbvml51WiaYYmHbxg3B5mjfha32UHqXQdhtFz02ASo=mo	This app has given me the boost to my drive allowing me to complete a lot more. There's a few minor quality of life changes that could make it better like: adding different color tabs for each task based on it's difficulty (i.e. trivial=yellow; easy=orange; etc.). Hope to see this app grow and reach more people the way it's reached me and my friends.	5	6	3.5.4	2022-07-18 22:00:22	Hi, Enzo! Thanks so much for your review. We're happy to hear Habitica has been motivating for you! We now have an official suggestion and comment form to help us keep track of what features users want the most. You can find it via Menu - About - Send Feedback if you’d like to add your ideas.	2022-07-21 01:27:45
33	a068fe11-bee1-428a-910d-59653088c4bb	Jenny Krishnan	https://play-lh.googleusercontent.com/a-/AFdZucrkvf_iswAAtob4Ezv5hqyoKs88zDVRhCXhbMf_iCU	Gamify task and habit tracking! ADHD friendly	5	0	3.5.4	2022-07-18 15:30:55	Hi, Jenny! Thanks for your review and kind words. They mean a lot to us! If you'd like to share any further feedback, please feel free to reach out via Menu - About - Support - Send Feedback.	2022-07-21 01:28:34
34	086e5a85-ab92-4304-94c3-5754d3d98917	Nickol0 yo	https://play-lh.googleusercontent.com/a-/AFdZucp2bOIpIpnaKvnaqlDCpTXmD0IHTqRfzom_kA40	Hello devs!! Great app by the way. Can I ask to add a built-in calendar and a better to-do interface. Im on my early programming, I may be able to contribute to this. I think it needs to have more features.	5	0	3.5.4	2022-07-18 00:54:18	Thank you for your review and offer! Calendar view is a highly-requested feature, and we hope to add it soon. In the meantime, you may find this user-made calendar tool helpful: https://habitica.fandom.com/wiki/Strategitica You can send us requests and offer to help as a programming blacksmith by going to Menu - About -Support - Send Feedback.	2022-07-21 01:31:23
35	abff0171-e210-49d4-8e12-349385e9d9d6	Erick	https://play-lh.googleusercontent.com/a-/AFdZucpTZEgKpCDZRsd9w5hv9yPabYqkRu6NEsyn6jk0QA	Notifications don't work, I think they are essential to what the app proposes to do. With notifications this would be 5 stars.	3	0	3.5.4	2022-07-18 00:26:44	Thanks for using Habitica. There's a support ticket open right now for fixing notification sounds, so we're hoping to have that fixed as soon as possible. If you’d like to share any feedback with us directly, you can do that via Menu - About - Support - Send Feedback.	2022-07-21 01:32:27
36	3aff8f27-57fd-4572-a384-b0ec943af344	Rupal Bhardwaj	https://play-lh.googleusercontent.com/a/AItbvmm4Z2OWVw7LqZ0_S14pmkOQqz03434MdicsOaiJ=mo	Good app but it is confusing	2	0	3.5.4	2022-07-15 05:34:41	Hi, Rupal! Thanks for trying Habitica, but sorry to hear you’re having trouble learning to navigate it! You may find the resources at Menu - About - Help and FAQ helpful. There's also a wiki that might help answer questions: https://habitica.fandom.com/	2022-07-15 18:40:43
37	bdfa0752-b76a-4225-84a2-adc2ebb20c0d	chimchim's noise	https://play-lh.googleusercontent.com/a-/AFdZucr60jqtbJM7knZfyLxwaHKKeSTIPDX696NSk0_N	Totally recommend to anyone who really need to list things in everyday life. Totally love it. Easy to use and many features.	5	0	3.5.4	2022-07-14 15:42:40	Thanks so much for your review and rating. We're happy to hear Habitica has been helpful for you! If you’d like to share any feedback with us directly, you can do that via Menu - About - Support - Send Feedback.	2022-07-15 19:22:27
38	d6af796a-43ac-4260-ac1c-dac95e9c03dc	SAI HARSHA	https://play-lh.googleusercontent.com/a-/AFdZucpil_hdriPfp1FwfT9qeIQehP3Y9LDMs2pTnVBVOA	Some things change the way you look at your habits. Anyone who is clear about their passion can use this as a weapon to work towards ur goals, which help u to stay in touch with ur passion every single day. I got overwhelmed in the initial stage and couldn't use this properly cuz I had no idea what I was going to do with my life. once I got clearer about, since then I've been using this to align …	5	0	3.5.4	2022-07-14 11:17:33	Hi, Sai! Thanks so much for your review. We're happy to hear Habitica has been helpful for you in clarifying and completing your goals! If you’d like to share any feedback with us directly, you can do that via Menu - About - Support - Send Feedback.	2022-07-15 19:23:20
39	334a8ae2-a49c-4921-a192-8b17ae9995c7	Aira Paglinawan	https://play-lh.googleusercontent.com/a-/AFdZucrg6rIwJwHa4q7W533jK84y7H4nBaifnyriWHOO	A perfect app if u want self-improvement	5	0	3.5.4	2022-07-13 11:35:45	Hi, Aira! Thanks so much for your review. We're happy to hear Habitica has been helpful for you in improving! If you’d like to share any feedback with us directly, you can do that via Menu - About - Support - Send Feedback.	2022-07-15 19:23:40
40	0825f47e-a623-4059-93ea-74665e929755	Joy Tsakanikas	https://play-lh.googleusercontent.com/a-/AFdZucq7ejkBks-tmYtWhkAdW0LEoFW2ZETSST8yhwQLdQ	friggin love it! i have bad memory, but this app is so good. i'm using it for challenges on my blog.	5	0	3.5.4	2022-07-12 09:47:33	Hi, Joy! Thanks so much for your review and rating. We're happy to hear Habitica has been helpful for you in remembering your tasks and for blog challenges! If you’d like to share any feedback with us directly, you can do that via Menu - About - Support - Send Feedback.	2022-07-15 19:24:23
41	d0cdeacd-33d4-4188-9481-bfbde4ab65dc	Chelsey Hilburn	https://play-lh.googleusercontent.com/a-/AFdZucrpLJxkYRHbh3R2cjT-fWKNUPFM_TBCe2wWpogd	This app interferes with my built in alarm app. I have a Google Pixel 6 Pro. If I set a task with a reminder, it sets an alarm that I cannot manage in the clock app and blocks me from opening my clock app to set other alarms. I had to delete the reminders and force stop the app to gain access to my alarms again. The reminders need to be a notification from this app not an alarm set on my built in…	2	1	3.5.4	2022-07-12 04:19:39	Hi, Chelsey! Sorry to hear you're having trouble with Habitica's notifications. If you’re still having issues, we’d love to take a look - you can send a direct report via Menu - About - Support - Report a Bug	2022-07-15 19:26:10
42	be033112-3e9b-4ea3-be11-659f8aae7829	Ocurrent	https://play-lh.googleusercontent.com/a-/AFdZucqbo0ydbso7D2Ee06JD_WMaeVh6dJomOfyK8hRHOg	It looks super good but i can't figure it out how to use it	2	0		2022-07-11 23:06:10	Thanks for trying Habitica, but sorry to hear you’re having trouble learning to navigate the app! You may find the resources at Menu - About - Help and FAQ helpful. There's also a wiki that might help answer questions: https://habitica.fandom.com/	2022-07-15 19:26:39
43	506ed915-3be3-4d50-a097-cac490fc7c5a	Moshood Olatokunbo	https://play-lh.googleusercontent.com/a/AItbvmklMF3dmSO3Me2IOddsdQqVdwLBG4Cw-aX52Xay=mo	Allows me to track dailies, but doesn't connect them to habits. I would expect that completing your dailies translates into building the desire habit. The tool gives no option to associate the 2 and you cannot see your performance history, so it's unclear which I should be focusing on.	2	0	3.5.4	2022-07-11 13:08:06	Thanks for your review and feedback! Habits can be done multiple times a day, but dailies are only once a day, so they can have different uses. But we do have an official suggestion and comment form to help us keep track of what features users want the most. You can find it via Menu - About - Send Feedback if you’d like to add your ideas.	2022-07-15 19:29:20
44	d6d6ac57-523a-4b6b-918e-ab4b15441be7	Sandro Schwartaski	https://play-lh.googleusercontent.com/a/AItbvmkL3rlH1SruMPIv_0YHdKT41EjRd_ioPeRy0AqQ=mo	It's a very good app if you want build need habits, but unfortunately don't have a version for smart watch, and I can't use the phone in my work, I love the app but need a version for smart watch	3	0	3.5.4	2022-07-11 13:02:04	Thanks for your review and feedback! We now have an official suggestion and comment form to help us keep track of what features users want the most. You can find it via Menu - About - Send Feedback if you’d like to add your idea about implementing it for smart watches.	2022-07-15 19:30:04
45	a060c621-b5fe-4ceb-a180-3d63f834aa74	Nemiah Novales	https://play-lh.googleusercontent.com/a-/AFdZucrZQ_kKfqlFnBJV6b-VtYaxMSk-pl_qPaOzqDwxqw	Absolutely amazing app. Easy to use. 10 stars ;))	5	0	3.5.4	2022-07-11 00:20:14	Hi, Nemiah! Thanks so much for your review and all those stars. We're happy to hear Habitica has been easy for you to use! If you’d like to share any feedback with us directly, you can do that via Menu - About - Support - Send Feedback.	2022-07-11 01:17:28
46	f55eacbd-b4fb-4995-9b6d-7ec8feb5f34d	Gabriel W	https://play-lh.googleusercontent.com/a/AItbvmmlszoHFyoz5R_On4imkpMoqnSdvgnk9vaVMtxl=mo	This is the best app on my phone. I love this, and it helps me do my tasks. To whoever made this, thank you.	5	0	3.5.4	2022-07-10 19:36:35	Hi, Gabriel! Thanks so much for your review--and you are welcome! We're happy to hear Habitica has been helpful for you. If you’d like to share any feedback with our developers directly, you can do that via Menu - About - Support - Send Feedback.	2022-07-11 01:23:29
47	2d7eb0c6-0db8-4eda-b7ed-127d3e8287be	kye randor	https://play-lh.googleusercontent.com/a/AItbvmnU0Toug64HwKVWFoFuhsiNRBJW0cHbuWxtCN-A=mo	I love the idea for this app. I've tried it several times throughout the years but I need the notifications and they have NEVER worked for me. I'll uninstall it for like the fifth time again I guess.	2	0	3.5.4	2022-07-09 21:06:00	Thanks for using Habitica. Sorry to hear about this issue. We do have an open ticket for working ob improving notifications. If you're still having trouble, let us know via Menu - About - Support - Report a Bug. A direct report will provide details that will help the team continue to fix the issue.	2022-07-11 01:27:10
48	e50b072f-27a6-436f-ab71-711cc6e97fbb	Zeb McNeil	https://play-lh.googleusercontent.com/a/AItbvmnBjsFrFPkczIDFPtKy84BqbylgW8kcoe8dXuaq=mo	I love it except, and this is a big issue for me, it's totally server based. Want to update anything, but have a bad internet connection? Too bad, it's either going to take forever or fail. I would use and maybe even pay for this app to just have a way to have everything first be saved on my device. So, back to hunting for a to-do app. Edit 3/23: I have to drop my review on this to 1 star. You ca…	5	71	3.4.2	2022-07-08 15:51:30	Thank you for this thoughtful review, but sorry we couldn't meet your needs. We hope you find an app that works for you :)	2020-04-01 04:33:35
49	3d62ac50-5e46-458c-a3a1-1990ced37109	Rose	https://play-lh.googleusercontent.com/a-/AFdZucpoJYZ3Si9_KTnDb5l-zke7YW0a7qBRiSkTKOSrP14	Habitica is a super cool concept developed by people who know what they're doing in terms of code and game design, but fall short on UX design specifically for the app. There are so many features, it's hard to organize them well in the app. Highly recommend the desktop version, still recommend this app but just not as much.	4	0	3.5.4	2022-07-07 04:20:55	Hi, Rose! Thanks so much for your review. We're happy to hear Habitica has been helpful for you! If you’d like to share any feedback with us directly about the app's UI, you can do that via Menu - About - Support - Send Feedback.	2022-07-11 01:29:37
50	e286b0a4-dccf-408b-916c-f6d7d5731365	Aklima Khatun	https://play-lh.googleusercontent.com/a/AItbvmlt3DllyZ5bM7aPHDiUQK4VdeKbh8wWLyJyGu1z=mo	Habitica is amazing	5	0	3.5.4	2022-07-06 21:48:30	Hi, Aklima! Thanks so much for your review and rating. We're happy to hear you are enjoying using Habitica! If you’d like to share any feedback with us directly, you can do that via Menu - About - Support - Send Feedback.	2022-07-11 01:30:11
51	a97a192f-3424-4a7c-be70-54582b15c4a9	Shobha Anand	https://play-lh.googleusercontent.com/a/AItbvmnpI0NSdajeNDfFKhG7sfPCjTneVl3WK1bL2eVh=mo	Great app but one problem. You should provide pro-version elements of game if a player reaches a certain level (let's say around 150) 🙏🙏	3	0	3.5.4	2022-07-06 15:48:31	Shobha, thanks for your review and feedback! We now have an official suggestion and comment form to help us keep track of what features users want the most. You can find it via Menu - About - Send Feedback if you’d like to add your idea.	2022-07-11 01:30:45
52	56b8b23b-f635-469d-968a-738640e9a5dc	Whoza	https://play-lh.googleusercontent.com/a/AItbvmkRAigpU3suHHu1z6gM7cubL4J262XaF1L5JVz3=mo	A strong three and a half. It definitely helps me with managing and doing tasks, to an extent. It REALLY helps me most on my daily tasks (like taking meds, brushing my teeth). However, after using it awhile, it does seem to plateau. I do recommend as it's quite helpful, but ultimately feels a little lacking. I would love to see the ability to trade items with your party, and to be able to use you…	3	24	3.5.4	2022-07-06 14:29:18	Thanks for your review. We're happy to hear Habitica has been helpful for you! If you’d like to share any feedback with us directly about what you'd like to see improved, you can do that via Menu - About - Support - Send Feedback.	2022-07-11 01:31:39
53	ea32419b-fc93-48f7-be45-231394a94fb9	Fletcher B	https://play-lh.googleusercontent.com/a-/AFdZucr_xyUu5VUuHGFpG1o4_Ud4yoFv64D4al5Pyki3	This is amazing. Its so cool, a rpg but with doing habits is the way to level up and attack bosses is amazing! If I could add one thing to this it would be customisable achevments One example is [grass slayer] where you mark it on a habit that's to mow the lawn and you can set the goal amount at 100 meaning you need to check off that habit 100 times This achevent system will rather need a self ch…	5	1	3.5.4	2022-07-06 06:01:17	Thanks for your review and feedback! We now have an official suggestion and comment form to help us keep track of what features users want the most. You can find it via Menu - About - Send Feedback if you’d like to add these great ideas.	2022-07-11 01:32:33
54	0b6a6d27-ba33-46a4-98a8-9e257a7bd1ef	Rajeev Vij	https://play-lh.googleusercontent.com/a/AItbvmkBAQ6EVzXe4vGfCfzxTYxlS_9VLrHFR0WdGKWb=mo	I've never seen a worse app. They decided to ban me randomly without providing any real reason to do so. I got a "you violated our community guidelines" message but wasn't told what exactly did I do wrong. I literally never joined any guilds and the only message I sent was to request someone to explain how guilds work because I was new without using any coarse language,of course. And then, the ba…	1	1	3.5.2.1	2022-07-05 08:24:59
55	a18642b3-a0d3-4871-99d5-6bbd8a90ef90	Ken Lopez	https://play-lh.googleusercontent.com/a/AItbvmncBynh4J8eXT3aKg4B-K86iDAnnRxlJTW51Akv=mo	Best planer for past gamers‼️	5	0		2022-07-03 17:59:22	Thanks so much for your review and rating. We're happy to hear Habitica and its gamification have been helpful for you! If you’d like to share any feedback with us directly, you can do that via Menu - About - Support - Send Feedback.	2022-07-11 01:45:36
56	626b96d3-a0b7-41ea-9a35-2c990ce51756	Phelly Chelsea	https://play-lh.googleusercontent.com/a-/AFdZucqFtTPuT4pg9gdNFcBysFMLg4KQqxuPtGRxbgee	Kindly create an MPESA payment method? I've just downloaded the app but MPESA is the most common , convient and widely used payement method in my country. I am unable to access the customised plan Because the payments options there are not the ones I have . Kindly get back ASAP as I'd like to start my July with the app to determine if ill use it for the remaining half of the year . Regards, P	1	0	3.5.4	2022-07-02 18:57:14	Hi! Google Play or Apple actually handle all payments related to in-app purchases and subscriptions. All of Habitica's productivity functionality is free and doesn't require a subscription. All items that can be obtained with gems (money) are purely cosmetic. If you need more info, reach out to admin@habitica.com.	2022-07-11 01:50:55
57	85467bb8-3cca-4bda-b775-8556013b1c52	Mushroom Marble3219	https://play-lh.googleusercontent.com/a-/AFdZucqeSeWsRF2c4uJSz3C-4Kwr5aHV98uqNLkrJeGr	I love this app for productivity! The only thing I would like is a wiget so I can access my tasks quicker	4	0	3.5.4	2022-07-02 17:04:20	Thanks so much for your review. We're happy to hear Habitica has been helpful for you! If you have comments about the existing Android widgets or any you'd like to see in future updates, please feel free to reach out via Menu - About - Support - Send Feedback.	2022-07-11 01:52:04
58	5bf31e49-2443-4968-a344-4d2082ccf93b	Mike S	https://play-lh.googleusercontent.com/a-/AFdZucqZSp2DiWXV0CtTCkIRDqLJsI0SpDa-HkQVhxRuwg	Good idea, worst realization. Not intuitive to use, I spent a lot of time trying to figure out how to delete automaticly set habits (I could not). I am sorry for my time	2	0		2022-07-02 08:59:57	Hi Mike! Thanks for giving Habitica a try, but sorry to hear you’re having trouble learning to navigate it! All habits in your list can be edited or deleted at any time. You may find the resources at Menu - About - Help and FAQ helpful. There's also a wiki that could be of help: https://habitica.fandom.com/	2022-07-11 01:54:07
59	9e6e9fb8-c518-40da-9b4b-3da14b1dac17	vishnu narang	https://play-lh.googleusercontent.com/a-/AFdZuco7UAqQgPQ5PmSjpOHXrvzmIx0eVoe8OF2zH45_lzU	The user experience is terrible. I just couldn't figure out how to get a daily habit going. Never got a reminder after I created a task a month or more ago. I may have not set it up correctly but that's the user experience problem. It's not intuitive at all. I'm willing to try it again if the design and ux changes and it becomes more intuitive	2	7	3.5.4	2022-07-01 05:01:56	Hi, Vishnu! Sorry to hear you’re having trouble learning to navigate Habitica! You may find the resources at Menu - About - Help and FAQ helpful. There's also a tutorial that shows the basics and a wiki you can search for even more info: https://habitica.fandom.com/	2022-07-01 14:26:54
60	de50293c-f02d-4eb4-a07e-9295f7a72d35	Sergey Goldgaber	https://play-lh.googleusercontent.com/a/AItbvmmVlL-gk9kge74nw7elW2kRlDo7qQGICsuG0-Ry=mo	Would be great if there was a 100% offline version of this, which did not require an account, because what I do in my life is none of this company's business. It has a privacy policy, but it's completely worthless without having a way to verify what they promise is true, which there isn't. That's not to mention that they give data on you to advertisers and other unnamed "third parties", who could…	2	2	3.5.4	2022-06-29 18:52:54	Thank you for your concerns. We take the privacy of our Habiticans seriously! We don't have any advertisers or share data with any third parties. The only time Habitica's staff might see a user's tasks is if we are asked by that user to investigate and fix a task-related problem or bug.	2022-07-01 14:36:07
61	ca670ee7-9757-4965-91dd-777454da6c73	who's there	https://play-lh.googleusercontent.com/a-/AFdZucr6V51ioMM-P6T5Qz4-Kvs5kKqEs3ZKevpojSNblQ	It changed my life	5	0		2022-06-29 06:39:37	Thanks so much for your review. We're happy to hear Habitica has been life-changing for you! If you’d like to share any feedback with us directly, you can do that via Menu - About - Support - Send Feedback. Happy adventuring!	2022-07-01 14:36:43
62	3d6a43fd-e977-4226-934c-3dc10557a953	Tyler Raber	https://play-lh.googleusercontent.com/a-/AFdZucr_2x1_PHDCaN2zcDnLbR4_csdNTrhkGkkvsfe8gag	Sure it gamifies your tasks, but it doesn't remind you of anything. Your app is useless if it doesn't actually do anything to help you remember to do your tasks...	1	1	3.5.4	2022-06-28 12:59:26	Thanks for using Habitica. There's a support ticket open right now for fixing notification sounds, so we're hoping to have that fixed as soon as possible. We now have an official suggestion and comment form to help us keep track of what features users want the most. You can find it via Menu - About - Send Feedback if you’d like to add your ideas.	2022-07-01 14:40:42
63	96a5978e-671b-46f4-8624-ad2c78396ad3	Jordan Skinner	https://play-lh.googleusercontent.com/a-/AFdZucpvvw-py3-1v1pxltMwLnatO0mE2EKHUEAabpnmTw	I was skeptical at first, but this app has proved a lot more useful than I thought it would be. The best feature is how it simultaneously allows for customization and depth of content. There are various features that you are free to use as little or as much as you want to, depending on your needs. This makes for a fun, challenging, yet also low-pressure environment to give you a boost on improvin…	5	0	3.5.2.1	2022-06-28 00:01:33	Hi Jordan! Thanks so much for your detailed review. We're happy to hear Habitica has been both fun and helpful for you! If you’d like to share any feedback with us directly as you continue to use it, you can do that via Menu - About - Support - Send Feedback. Happy adventuring!	2022-07-01 14:41:58
64	e2917ec1-5ce2-4576-bb62-b217eb265eff	Stryder Hudlow	https://play-lh.googleusercontent.com/a-/AFdZucp_OoHtbKn0rdFow_ab8h9P8JQxfczluqCrDHU	I've had this app for almost 3 years and I can sincerely say that it's borderline perfection. You can customize it to your hearts content, the motivation potential is massive, a great example of this is my tasks to deal with projects, to-dos, learning, exercise, and so much more every single day. It's basically the only reason I'm even close to a high schooler/pseudo college student depending on …	5	54	3.5.4	2022-06-27 01:08:41	Hi, Stryder! Thanks so much for your rating and detailed review. We're happy to hear Habitica has been motivating for you! If you’d like to share any feedback with us directly, you can do that via Menu - About - Support - Send Feedback. Keep up the good work in getting those tasks done!	2022-06-13 01:51:45
65	0db9b7b2-2b92-41f6-ae0c-9b99e0ed7669	Lee Schlosser	https://play-lh.googleusercontent.com/a-/AFdZucri41xpUbztLoKmqmdDUsnjnloJh2FW5bdgA7iXPw	Please make rewards history available.	5	0	3.5.4	2022-06-26 15:14:18	Thanks for your review and feedback! We now have an official suggestion and comment form to help us keep track of what features users want the most. You can find it via Menu - About - Send Feedback if you’d like to add your ideas about listing rewards history.	2022-06-26 21:19:46
66	1d402fe9-4c34-42b4-a3be-c89f258905cf	Artemis Mary	https://play-lh.googleusercontent.com/a-/AFdZucoJGDAqbWDEynPxL5Ap5DmDPboWj-WTaAK04jux	Exceptional! Good concept, very adictive	5	0	3.5.4	2022-06-26 11:49:21	Thanks so much for your review. We're happy to hear Habitica has been helpful for you (and addictive in a GOOD way)! If you’d like to share any feedback with us directly, you can do that via Menu - About - Support - Send Feedback.	2022-06-26 21:20:20
67	5245a29f-758c-4483-b0ad-8945e5291f26	Miles Maxim	https://play-lh.googleusercontent.com/a/AItbvmk35L764oumuT1Gep4XqIFwJjEIo1OvlhLuRdbs=mo	Amazing app!!! I have only one suggestion and that is it would be nice to have bio's for our profiles that can be seen by our fellow party members. I feel it would bring more character and information to our profiles.	5	0		2022-06-26 06:07:04	Hi, Miles. Thanks so much for your review. You can add your bio in the "About" section of your profile any time. Hope this helps you and your fellow party members to get to know each other better!	2022-06-26 21:24:41
68	f1524561-0cb0-426f-b912-063597911ded	Clark Villaseñor	https://play-lh.googleusercontent.com/a-/AFdZucr645UmLpktSSuNNcEzUa_5ZB-pERH1FkB6iTXiVA	I'm really not a fan of how all the black hairstyles are premium content and require you to pay money. Otherwise decent app.	3	1	3.5.4	2022-06-25 22:37:02	Hi, Clark! Thanks for the feedback and for using Habitica. Almost all of our hairstyles do cost gems. However, there are a number of ways to earn gems without using money. You can read more about them here: https://habitica.fandom.com/wiki/Gems#Obtaining_Gems_for_Free	2022-06-26 21:29:03
69	4d74cb5e-36f4-465c-9fd7-0c78453b2bdd	AmirHossein Etemad	https://play-lh.googleusercontent.com/a-/AFdZucpyRkn_hDNIEI4R4Sj8wBAxYSPZ0WF2W66pu2y4xA	Lag	2	0	1.4.3	2022-06-25 18:54:12	Sorry to hear you're experiencing a lag when using the app. Please let us know if you're still having trouble via Menu - About - Support- Report a Bug and the team will look into it.	2022-06-26 21:30:53
70	4ace6282-f916-4347-9ad1-69a0b3987bf7	Dracoding	https://play-lh.googleusercontent.com/a-/AFdZucp1hnYiYf6-m8ZD1E-ZpQDICokfVDWMSoT6qp--5g	You should remove fix character values from the app. It is only making this app worse and people are having easy free money.	2	0	3.5.4	2022-06-25 16:50:42	Fix Character Values is there for when people feel something unfair happened. Sometimes people also use it for special rewards, like trading XP for health. You can’t really cheat in Habitica, as the real goal is the improvement in your real life. We hope that clarifies this feature.	2022-06-27 22:20:13
71	dd0f6da9-ebe9-4b0a-b8fe-582afcdd20ac	Nishant	https://play-lh.googleusercontent.com/a-/AFdZucpEugTXFvuo1wGCQWo6ILNEkxo2nms6T2BsmzwGowc	Widget doesn't update automatically everyday unless I open the app.	3	0	3.5.4	2022-06-25 02:05:01	Thanks for using Habitica. If you have comments on our widgets or any you'd like to see in future updates, please feel free to reach out via Menu - About - Support - Send Feedback.	2022-06-26 21:33:02
72	59cf7e1a-37d0-455a-b77c-cd42eeca564c	Sumonosk3 .R	https://play-lh.googleusercontent.com/a-/AFdZucoUvYqzE60wc6VWKIXlEGVCxwvVQ-asVuP4ODko	Even cant enter the app has bugs when i want to register nothing happens	3	0		2022-06-24 15:13:24	Sorry you're having trouble registering. If you continue to have trouble, please reach out to us at admin@habitica.com so we can help you out.	2022-06-26 21:34:38
73	42c978e9-9b73-4d94-aba5-c5025236ce8c	Simone Ludeman	https://play-lh.googleusercontent.com/a/AItbvmmijHI2b7CljuLvrGxzCZCcnoEcHf3lhybl2GJ5=mo	Really love the concept of this app. It's fun and motivating	5	0	3.5.4	2022-06-23 21:52:27	Thanks so much for your review. We're happy to hear Habitica has been both fun and motivating for you! If you’d like to share any feedback with us as you continue to use it, you can do that via Menu - About - Support - Send Feedback.	2022-06-26 21:35:01
74	5cddd51d-a0e4-4370-bf16-431104818acd	Valerie Galluzzi	https://play-lh.googleusercontent.com/a/AItbvmk_ewGy3BQR0Ux7eY3fe325MhHl5UsFF_MumpPp=mo	Great way to get organized and have fun	5	0	3.5.4	2022-06-23 20:20:48	Hi, Valerie! Thanks so much for your review. We're happy to hear Habitica has been useful for you! If you’d like to share any feedback with us directly, you can do that via Menu - About - Support - Send Feedback.	2022-06-26 21:35:48
75	98a77a7e-ed97-47bd-a410-231bc7eb06c9	Nicki Roy	https://play-lh.googleusercontent.com/a-/AFdZucpSe675iul3pgv99Jne4nXM1IRRkIJ3H32Z3z14bw	As someone with adhd who never has people over I struggle to do chores because there is no reward I care about enough to force myself to do the task. This app has gone a LONG way towards helping my motivation.	5	0	3.5.4	2022-06-23 19:48:36	Hi, Nicki! Thanks so much for your review; it means a lot to us. We're happy to hear Habitica has been so useful and motivating for you! If you’d like to share any feedback with us directly, you can do that via Menu - About - Support - Send Feedback.	2022-06-26 21:36:29
76	ca823cbf-fd03-4bed-8586-587f7073fde0	William Morgan	https://play-lh.googleusercontent.com/a-/AFdZucruEjQ8fU8y28YzqVu4VcBxsZSsvhIfpLMJZ8hPkw	It is good with the day tasks. But there is no game part	2	0	3.5.4	2022-06-23 09:23:41	Hi, WIlliam! Thanks so much for this thoughtful review! Habitica is primarily meant to be a productivity aid, and the real excitement is the improvement you see in your real life as you accomplish tasks in the gamified interface. Thanks for your feedback, we'll keep in mind for the future!	2022-06-26 21:37:08
77	3c44c99f-aa70-4793-996c-b61d668648a0	Burnt Toast Gaming	https://play-lh.googleusercontent.com/a-/AFdZucpzLL9tlA00-HUidjk8UvQFNNoJq82McMSgWjSQGw	Would be full start except I can't make my character a man lol	4	0	3.5.4	2022-06-23 08:54:11	Thanks for your rating and review. You can customize your avatar in many different ways. You can read more about that here: https://habitica.fandom.com/wiki/Avatar_Customizations	2022-06-26 21:40:18
78	7bf462a9-b915-48f3-8de0-32d78f88597f	Joseph Papica	https://play-lh.googleusercontent.com/a/AItbvmlNW1wzvoJnokYA6vN3zF5lkEMqalUywgR9Hynf=mo	I really love it. But can you please add a undo botton so that you can undo what you might have clicked accidentally. Thanks and one more thing, make it offline when doing the task.	4	0	3.5.2.1	2022-06-22 05:29:15	Hi, Joseph! Thanks for the review and rating! You can filter your lists by finished/complete tasks. For example, if you accidentally click a To Do that you haven't done, you can look at your completed To Dos and uncheck it so it will instantly return to your To Do list. Hope this helps!	2022-06-26 21:42:55
79	280f8d18-262f-43d2-a010-aad0f5ee09e5	Silver Spectrum	https://play-lh.googleusercontent.com/a/AItbvmm4aLN09Sk5mFaJ0rdfpEccdQ741MNsCNuvaXhw=mo	Love the idea but it's unusable to me without being able to set reoccurring tasks with a different date that the item appears to it's due date. Eg a weekly task that appears on Monday and needs to be done by Sunday then reappears in two weeks. I'm planning on an extensive list of things some of which only need to be done monthly or 3 monthly so it's no good seeing them constantly in grey when it'…	4	7	3.5.2.1	2022-06-21 06:11:38	Thanks for your review and feedback! We now have an official suggestion and comment form to help us keep track of what features users want the most. You can find it via Menu - About - Send Feedback if you’d like to add your ideas about tasks with an active date range.	2022-06-26 21:44:04
80	6336f1ed-3683-4b49-ac32-cbfac8f68d42	Jason Robinson	https://play-lh.googleusercontent.com/a-/AFdZucqETjd_YA9L1bhhwpUaDebNyGp2_5MEX3XvSZw8Lw	Nice little app to gamify my life and actually get me productive. Only just started using it but seems pretty cool. There will be probably some features I'd like to recommend, maybe be able to follow and see friends progress. Thanks	4	0	3.5.2.1	2022-06-20 17:24:18	Thanks so much for your review. We're happy to hear Habitica's gamification has been helpful for you in being productive! If you’d like to recommend features as you continue to use it, you can do that any time via Menu - About - Support - Send Feedback.	2022-06-26 21:45:06
81	f9523d32-75a5-43b2-bf84-2aedaf181e6b	tiwil555	https://play-lh.googleusercontent.com/a-/AFdZucoqwiaED-qK6eryh3EgOf4ssqZRI8b_QvHlyrz0	Really useful and fun application to get all your task done ! Really pushing myself with this to lvl up!	5	0	3.5.3	2022-06-19 18:45:17	Thanks so much for your review. We're happy to hear Habitica has been helpful for you! If you’d like to share any feedback with us directly, you can do that via Menu - About - Support - Send Feedback. Happy adventuring & leveling up!	2022-06-26 21:45:54
82	66890676-2b76-4c16-a2cc-2db9e1c1c7f7	Margarita Dialyna	https://play-lh.googleusercontent.com/a-/AFdZucrvFmsJt-UDy9yh36LkKd-d3BZq7LmJzqRgrqjd	It's the best app if you want to get organized but never seem to succeed.	5	0	3.5.3	2022-06-19 11:50:35	Hi, Margarita! Thanks so much for your review. We're happy to hear Habitica has been helpful for you in getting organized! If you’d like to share any feedback with us directly, you can do that via Menu - About - Support - Send Feedback.	2022-06-26 21:48:32
83	3889b7f3-36f1-40a7-8f40-90ceb5169de0	Charlulu	https://play-lh.googleusercontent.com/a/AItbvmlPOBWRe3Kltov1TvJYcy_bYoo6-diC2sP4ub2G=mo	A great app that will greatly help people especially gamers who wanted to build consistency, schedule or routine into their daily lives. As a gamer who's constantly having a hard time with focusing on my routines and schedules, this app greatly help me organized my daily scheds and routines. This app also made me feel like my life is game hahaha. Like a sim simulator or something. It really fuele…	5	0	3.5.3	2022-06-17 17:58:11	Hi, Charlulu! Thanks so much for your review. We're happy to hear Habitica's gamification has been helpful and motivating for you! If you’d like to share any feedback with us directly, you can do that via Menu - About - Support - Send Feedback. Keep adventuring!	2022-06-17 19:54:10
84	656a3d24-48bc-4cfa-b7bd-2afd4d14f55d	x_LucidAfton_x	https://play-lh.googleusercontent.com/a-/AFdZucr1h3uGuO3Kv_kuuVdq1jE30ztE_Gk7g1iiLBE	It's fun	5	0	3.5.2.1	2022-06-17 10:57:50	Thanks for your review. We're happy to hear Habitica has been fun for you! If you’d like to share any feedback with us directly, you can do that via Menu - About - Support - Send Feedback.	2022-06-17 19:55:42
85	a8bc0682-3cba-40ab-aee1-28ad4996ada6	Maggie Bonham	https://play-lh.googleusercontent.com/a-/AFdZucrPpZMYWBhcrw5ieKD30cHCjpBHq8aZbCI1vF_mbA	I love this app. First time I'm motivated to get things done. Who thought gamifying my life would make me do things? Some minor glitches, but otherwise brilliant. There are so many people supporting you, challenges, guilds, quests, and more, it really does make me get stuff done and focused on remembering things.	5	0	3.5.2.1	2022-06-17 07:15:05	Hi, Maggie! Thanks so much for your review. We're happy to hear Habitica has been motivating for you! If you’d like to share any feedback with our devs about a minor glitch you spotted, you can do that via Menu - About - Support - Send Feedback. Happy adventuring through life!	2022-06-17 19:56:52
86	7fd01aa5-0d61-4d85-9d84-7187f6f8c722	Victor Gomes	https://play-lh.googleusercontent.com/a-/AFdZucpLWcPwT6AZkCUC9CtJlIUjObFWFjOuhlpZEtCm-Q	Why I have to create a account ? Why the game is online ?	1	1	3.5.2.1	2022-06-16 19:52:35	In order to ensure that your tasks and progress in this productivity app are available and close at hand both on the web and in a phone app, users must make an account online. Habiticans can then access their information and adventure from any platform.	2022-06-17 19:59:36
87	b5c129a1-86ee-405d-9544-52bd089f13d9	Mystic Tame	https://play-lh.googleusercontent.com/a/AItbvmkQzI78ELTKXjlZ9w8n7S3ssszjk7v441tjILJy=mo	I like the app and have been using it for about a week but every time I do something it crashs Edit:they got back to me asap and fixed it. I use it all the time even now and even got a new mission.	5	0	3.5.2.1	2022-06-16 19:23:47	Sorry to hear the app crashed. If you continue to experience this, please reach out to admin@habitica.com so we can try to figure out what's going wrong.	2022-05-07 15:13:57
88	1f7aa1ef-2418-4034-a133-375dd812e2f9	Adriana A. Diaz E.	https://play-lh.googleusercontent.com/a-/AFdZucqm7opFLnTLfCkgXTAZuGoDKozXfLdSMOK2JaF4	I love that you can gamify your tasks. It makes it more fun.	5	0	3.5.3	2022-06-16 16:58:56	Thanks so much for your review. We're happy to hear Habitica's gamification of tasks has been helpful for you! Keep up the great, fun work! If you’d like to share any feedback with us directly, you can do that via Menu - About - Support - Send Feedback.	2022-06-17 20:00:22
89	7e83375c-d2ed-4009-8f6c-d9255225e6d3	Kevin Hinterberg	https://play-lh.googleusercontent.com/a-/AFdZucpkIQRUqEznPFJRtM6Dgmge9S8oNOnLc9OAF1aC4g	Started using this app yesterday, and I already subscribed. I feel like this will be life changing.	5	0	3.5.2.1	2022-06-16 14:09:29	Hi, Kevin! Thanks so much for your review and for supporting Habitica as a subscriber. We hope Habitica continues to help change your life! If you’d like to share any feedback with us directly as you continue to use the app, you can do that via Menu - About - Support - Send Feedback.	2022-06-17 20:01:22
90	76034c0f-83ba-49b7-8f5a-407dad4c0d46	Rohit Mehta	https://play-lh.googleusercontent.com/a-/AFdZucqFTFCBMuq5NMMq2rZhJm1T-d48bLLFnS3ExAjOIQ	Love it!	5	0	3.5.2.1	2022-06-16 11:11:39	Hi Rohit, thanks for your review! We'll keep your feedback in mind as we continue to work to improve Habitica. You can contact us directly by going to Menu - About - Send Feedback if you'd like to give us additional details.	2020-10-14 23:04:57
91	fefd791b-6af6-4244-a19d-6b5acbbc1b37	anmol studio	https://play-lh.googleusercontent.com/a-/AFdZucqS8_LX0AtUdH9JHBGDq4Aes9TyJvu6hv0CTq1z	Love you for creating this app! It organize all my life habits , daily work and to do. A big thank you and hug to the developer for making this app	5	0	3.5.3	2022-06-16 09:12:43	Thanks so much for your review. We're happy to hear Habitica has been helpful for you in organizing your habits! Hugs right back atcha! If you’d like to share any feedback with us directly, you can do that via Menu - About - Support - Send Feedback.	2022-06-17 20:02:09
92	7a04de64-76f7-4c89-b45e-88fc934ca399	fateme marashi	https://play-lh.googleusercontent.com/a/AItbvmlaxNnD54HnmYqV_vkY7cFV_bn60IggT4e7ZqOX=mo	I can't login to android version or register on it	1	0		2022-06-16 07:51:57	Hi. Sorry to hear you're having a hard time registering on the app. If you continue to have a problem creating an account or logging in, please contact us at admin@habitica.com so we can help out.	2022-06-17 20:02:58
93	8c3ddaca-e202-46b8-ae84-113542b0415f	Flare Huntsworth	https://play-lh.googleusercontent.com/a-/AFdZucpfCq-TTqa0TFoFyJO2jB4tTgAfaRt8aEEsdr-YNw	Few to no ads, simple and easy to use. I can't think of any complaints at the moment.	5	0	3.5.2.1	2022-06-16 02:52:40	Thanks so much for your review. Habitica is committed to keeping our app ad-free! We're happy to hear Habitica has been easy for you to use. If you’d like to share any feedback with us directly in the future, you can do that via Menu - About - Support - Send Feedback.	2022-06-17 20:04:32
94	586fe52f-9c16-4078-8ed9-e486869d0757	Zachory Miller	https://play-lh.googleusercontent.com/a-/AFdZuco88E1aD5_lvPtqiOY8xLqL0HABnktp6-_sRWInkA	Couldn't hit the finish arrow after I made my character. Waste of time.	1	0	3.5.2.1	2022-06-15 02:16:37	Sorry to hear you had trouble getting through the beginning steps. If you're still having trouble, we would be happy to help you, if you want to reach out to us at admin@habitica.com.	2022-06-17 20:06:45
95	1e7d8a05-9bf5-4265-9aaf-c0ec877ef961	Manperson	https://play-lh.googleusercontent.com/a-/AFdZucqQ7YQeIVQY8L3jASDpKI32LywO6sE3Utn7A93U	It's not really working for me, but it will probably help many other people :)	4	0	3.5.2.1	2022-06-14 04:05:23	Thanks for taking the time to leave a review, even though Habitica isn't working for you personally. We hope you find something that meets you needs, and Habitica will be here if you ever want to try it again.	2022-06-17 20:09:58
96	f7de4845-3527-4f3e-b3be-03af1a06ea6e	Samjit Opc	https://play-lh.googleusercontent.com/a/AItbvmlsRgTRGrzoapOt0gHQZzYDy5qhv6AzCkdaIIh-=mo	😘	5	0	3.5.2.1	2022-06-14 00:56:26	Thanks so much for your review and emoji! If you’d like to share any other feedback with us directly, you can do that via Menu - About - Support - Send Feedback.	2022-06-17 20:10:26
97	54a3aaf4-29de-4dd7-920b-1e6766722cba	sphurious two	https://play-lh.googleusercontent.com/a/AItbvmnGWw7_T5R-1OxT2Lwg37OyrA5N_CaWNKWy-EoJ=mo	Very helpful, but could you please also add challenge completion mentions on profile info? (Which challenge maker is allowed to give away) to everyone who participated and completed the challenge so as to increase the motivation to complete a challenge, inspite of slim chances of winning gem due to many participants? Edit - Thank you for the form and reply	5	0		2022-06-13 13:22:22	Thanks for your review and feedback! We now have an official suggestion and comment form to help us keep track of what features users want the most. You can find it via Menu - About - Send Feedback if you’d like to add your ideas.	2022-04-29 19:45:39
98	c3e403fd-c442-4a57-89cf-4f9e4a26fbca	Atrxsk	https://play-lh.googleusercontent.com/a-/AFdZucpKTysje_IB02qp6qI66jmaFEvlhoW7J-rrO0LlkWY	Great app but I recommend having an UNDO button and checking the stats (on your phone) such as the overall counter of habits/dailies to be able to track them not just daily/weekly/monthly	4	0	3.5.2.1	2022-06-12 05:45:38	Hi, Atrxsk! Thanks for your feedback! You can undo a to do by filtering by completed and then unchecking it. We’re working on graphs and stats right now and hope to add them very soon! In the meantime, you may find the Data Display Tool one of our devs created helpful: https://oldgods.net/habitrpg/habitrpg_user_data_display.html .	2022-06-13 01:43:39
99	f58f26f1-5531-4c33-b12b-c45600449943	Kevin Childs	https://play-lh.googleusercontent.com/a-/AFdZucq0G4wc01EGGIB_0XgA4BTG5f-FrGR7bCf74wpVx6Q	It's a fun way to get a family or group of friends to work together to better themselves. Set daily tasks, habits you want to form, to do lists, and level up your adventurer. There's the option to pay for items that can make your game move faster, but if you remember your goal for self improvement should be a marathon instead of a sprint, it's easier to take your time and enjoy the grind.	5	21	3.5.2.1	2022-06-12 02:35:02	Hi, Kevin! Thanks so much for your review. We're happy to hear Habitica has been helpful for you and your family/friends! If you’d like to share any feedback with us directly, you can do that via Menu - About - Support - Send Feedback. Happy adventuring on your marathon toward your goals!	2022-06-13 01:44:47
100	5a62dad2-9f5b-4519-ba7d-ff23e6f7f281	Tee Smith	https://play-lh.googleusercontent.com/a-/AFdZuco7S73ticb45NPKRwqacCecnI_spTr_pO0qSNQTzg	Truly life changing! I was hesitant at 1st, due to the pixillated images, but this is the most motivating app I've ever come across. You can be lazy or productive, it doesn't judge, but trains you over time to be accountable. Having adhd, depression & anxiety, my time management & level of procrastination is dreadful to say the least! It's made me over 50% more productive in a week, & made some f…	5	5	3.5.2.1	2022-06-09 18:24:50	Hi, Tee! Thanks so much for your review. We're happy to hear Habitica has been useful for you and that you've formed some friendships! Your comments mean a lot to us. If you’d like to share any feedback with us directly in the future, you can do that via Menu - About - Support - Send Feedback. Great work & happy adventuring!	2022-06-13 01:50:02
101	e1fd2e30-f2af-423b-b3cb-ebb37ab838c1	Aurison Sithole	https://play-lh.googleusercontent.com/a-/AFdZucrVCbxEjygFNqqE8C8h2SnjFS-z674ipwdsCIPEcg	It crashes	2	0		2022-06-09 16:38:04	Sorry to hear about this issue. Please let us know if you're still having trouble via Menu - About - Support- Report a Bug and the team will look into it. If you can't access the app at all, you can contact mobile@habitica.com.	2022-06-13 01:50:44
102	af6f1178-62ff-47ac-b382-8db189c0658d	Shubhamkar Ayare	https://play-lh.googleusercontent.com/a/AItbvmm6Xk7WeEHEHqt7ScOUGbZHMiBt8vIHKoIcjPxk=mo	A bit too fancy, perhaps a "simple mode" will do. Also need an easier way to set XP. And a bug: Ticking and unticking keeps increasing the streak	4	0	3.5.2.1	2022-06-08 05:41:56	Thanks so much for your review. You can help us fix bugs by reporting them directly via Menu - About - Support - Report a Bug.	2022-06-06 01:25:30
103	e8cb1c72-8664-4df2-bc70-729eaba64179	Noctua	https://play-lh.googleusercontent.com/a-/AFdZucpR4wEFgXefMdySRcwvUAVv-wWG2k-Gv5xgXQqI	I was in a really dark place and this app helped me turn my life around. I am so very much grateful to the developers.	5	1		2022-06-08 00:12:17	Thanks for your review and kind words. They mean a lot to us! If you'd like to share any further feedback, please feel free to reach out via Menu - About - Support - Send Feedback.	2022-06-13 01:53:35
104	931a6d86-5f21-4e52-9af2-89e095890963	Bick Dug	https://play-lh.googleusercontent.com/a-/AFdZucrKW2IlyK74yqMkGrDfJ6nxJS6QeUNw3C95XGJtvw	A perfect app for people who wants to plan their life but can't really seem to get started. Design is intuitive and simple, makes planning and completing task just a tiny bit more motivating and that's all that I needed. The avatars' sprites could improve in the clarity and quality just a tiny bit but overall everything works fantastically.	5	0	3.5.2.1	2022-06-07 16:48:08	Thanks so much for your review. We're happy to hear Habitica has been motivating for you! If you’d like to share any feedback with us directly, you can do that via Menu - About - Support - Send Feedback. Our artwork is done by volunteers from our community. If you're a pixel artist, you're welcome to create some!	2022-06-13 01:55:27
105	5f71dc56-3e9f-4d06-94eb-c42cbc5fe702	Condigrail	https://play-lh.googleusercontent.com/a/AItbvmm8fluZ_WNb01qoojVU7vgdBBV68rAxJsAcDHHN=mo	Very good app but a little bit laggy - takes time to show To-Do's or Dailies/any type of list. Also it has so good reward function that truly motivates you to do things. It is great app.	5	0	3.5.2.1	2022-06-06 10:26:51	Thanks so much for the review and rating! The devs are working to improve load speed, so keep your eyes out for a new update soon. You can send more details to help us fix it, if you like, by sending us a message at mobile@habitica.com.	2022-06-06 01:13:03
106	4a169c1a-74bf-4c87-9264-45c0a6531a5b	BD Project	https://play-lh.googleusercontent.com/a-/AFdZucpmC8LIlytU3R_MgeS88iBNQgL0tvIeJF3Za6w-aw	Came back here to give a 5 star. Habitica is a must have if you really want to tap into your reward syste. Having a bad habit and want to replace it with game like rewards? No motivation on doing tasks? Have a task/duty that you feel as a grind, which is unavoidable and necessarry, but not motivated anymore to carry it out? Use habitica. The best way to deal with grind and demotivation. I highly …	5	0		2022-06-06 09:45:21	Thanks so much for taking the time to come back and leave your review and recommendation. We're happy to hear Habitica has been useful and motivating for you! If you’d like to share any feedback with us directly, you can do that via Menu - About - Support - Send Feedback. Happy adventuring!	2022-06-13 01:57:14
107	a9ccdc33-613b-4335-a994-7c629595de1b	Trien Van	https://play-lh.googleusercontent.com/a-/AFdZucrDiffAj6C1AncF0Xe2lOaQ_iNokIpig7kLZtH-Ig	This app helped me to find new problems to solve by making the ideas more repeatable each day or each week, eases on the stress that comes with planning out every minor routine for the day, and overall is a useful app for updating and staying on track	4	0	3.5.2.1	2022-06-06 07:37:05	Hi, Trien! Thanks so much for your review. We're happy to hear Habitica has been helpful for you! If you’d like to share any feedback with us directly, you can do that via Menu - About - Support - Send Feedback. Keep staying on track!	2022-06-13 01:58:04
108	3f176449-9dbb-4460-897b-d335b397dfc9	Aoi Jibratul	https://play-lh.googleusercontent.com/a-/AFdZucpdWw3kuv2S0jEKk2rjNo46o-U0Co4mHYpU8xMa	I really love this app, but so bad that the notification did not activated online or there some limitation playing offline. This is so disappointing to me because I like to go offline (airplane mode) so that I can be more productive, and that would be amazing if the feature help me out. Edit: giving more stars because developer respond is good	5	0	3.4.1.1	2022-06-06 01:21:13	Thank you for your review! We plan to add offline mode in the future. In the meantime, if you’d like to let us know what features you’d use the most offline, you can do so via Menu - About - Support - Send Feedback.	2022-06-06 01:13:27
109	4a168b64-f781-461b-ad9d-8048e73028c9	Islam Basiony	https://play-lh.googleusercontent.com/a-/AFdZuco2yInxNLPhtaKqbD2yq7zEpoTvss1-d6gmgPEk9g	Tends to make u productive in a different ways My advice keep it simple and don't join guilds	5	0	3.5.2.1	2022-06-03 13:31:07	Hi, Islam! Thanks so much for your review. Everyone uses Habitica a little differently, so we're happy to hear what has been most helpful for you! If you’d like to share any feedback with us directly in the future, you can do that via Menu - About - Support - Send Feedback.	2022-06-06 01:14:28
110	3ce6b4ec-8eda-42f4-ab17-e03635916dfe	Vincent Roger	https://play-lh.googleusercontent.com/a-/AFdZucoPkfdeeXPMPCfEwCzZHYaP91An-FfJy5GFWDFBMw	Best productivity app I tried. It is the only one that fill all my needs. The quests are not that challenging once you reached level 100, new content in that regard would be great	5	0	3.5.2.1	2022-06-03 08:48:34	Hi, Vincent! Thanks so much for your review. We're happy to hear Habitica has been helpful for you! If you’d like to share any feedback with us directly about difficulty levels, you can do that via Menu - About - Support - Send Feedback.	2022-06-06 01:14:59
111	e09b4a72-885c-4ccc-907b-57c1da36af3b	Anis Syazwani	https://play-lh.googleusercontent.com/a-/AFdZucoYNVooKu6gpkIf2OWbSpGMQLFdG55YUXlWf0qE	Wish there is a way to add sub-lists under one task, something like Steam's number tap, like a loading bar. You can see the task's progress, tap the task and look what you've done and what you're still missing I also wish you can rearrange the list, doesn't have to be by name but anything	2	1	3.5.2.1	2022-06-03 07:04:11	Thank you for your review! You should be able to add subtasks under a task and see the progress (number accomplished out of total). If you need help setting that up, check the Wiki or FAQs. And if you would like to share feedback with us, you can do that via Menu - About - Support - Send Feedback.	2022-06-06 01:17:31
112	bd28d7d7-4052-4504-8280-8a2aa0aad267	Shaks Ahmad 2	https://play-lh.googleusercontent.com/a/AItbvmmoQRU2cjtOK6AQFnswxmmKPa__P6apwKxnciSg=mo	The best App i have ever usex	5	0	3.5.2.1	2022-06-02 19:14:06	Thanks so much for your review. We're happy to hear Habitica has been helpful for you! If you’d like to share any feedback with us directly, you can do that via Menu - About - Support - Send Feedback.	2022-06-06 01:17:42
113	9cf09749-00a6-40a5-81be-11529169d02a	David Guzman	https://play-lh.googleusercontent.com/a-/AFdZucrQMZ71iiYgUWfrEP4PItIQ06Qneq757vM_lruJAQ	It's a great app but I would love an offline feature!	4	0	3.5.2.1	2022-06-02 17:57:03	Thank you for your review! We plan to add offline mode in the future. In the meantime, if you’d like to let us know what features you’d use the most offline, you can do so via Menu - About - Support - Send Feedback.	2022-06-06 01:18:20
114	8613be6f-e0d8-4d41-ab2e-5b7b269a914c	Dr Morpheus	https://play-lh.googleusercontent.com/a-/AFdZucoT6qaVchX4_dL31xGHgujSkpXg-i_wvL2ebUBm3Q	Im loving it so far. Though, I have and idea on how to improve things... maybe add a time limited daily task (e.x 05/06/22 to 06/06/22). I think it'd helpful for temporary daily things! And also the ability to pause certain dailies would be nice	5	0	3.5.2.1	2022-06-02 16:22:53	Thanks so much for your review. We're happy to hear you love Habitica! You're certainly welcome to add dailies for a block of time then remove them when no longer needed. We have an official suggestion and comment form to help us keep track of what features users want. You can find it via Menu - About - Send Feedback if you’d like to add ideas.	2022-06-06 01:20:28
115	e0c01c2f-e9b2-46fb-a9a7-2c24f61ba316	Ghost	https://play-lh.googleusercontent.com/a-/AFdZuco5v4EhZEzSiWDqJXc7c-8QPRlU2f0yIxXreZHW2B8	Keeps telling me I'm not connected to the internet when I clearly am. Have to disconnect my WiFi in order to use this and it's really annoying.	1	2	3.5.2.1	2022-06-01 23:07:31	Hi, Ghost. Sorry to hear about that. You might try a fresh download of the app while you're online and see if that helps. You can also reach out to our support team at mobile@habitica.com.	2022-06-06 01:21:53
116	7180ad84-22b1-4ac6-907d-968e250cb839	gale Smith	https://play-lh.googleusercontent.com/a/AItbvmkY_-NbHgm4Ur6FtZgPxJYpdi0_imoW3mn2A5Ce=mo	As soon as I did the update my acct. was gone. What happened?	1	1	3.5.2.1	2022-06-01 16:52:43	Hi, Gale! Sorry to hear you experienced something strange when you updated! Your account should be safe on the cloud waiting for you. Please reach out to admin@habitica.com so we can reconnect you to it!	2022-06-06 01:23:11
117	d0a0d81a-4cb3-4a52-9c4a-c010212d06bd	Val	https://play-lh.googleusercontent.com/a/AItbvmkYjOEbnXhef2qbRQvnM3GOrOSgJmNO8ZWzeuogCw=mo	It's really cool and you know what? It actually made me change and I keep studying and doing everything on my schedule. Before I was a really lazy kid, and I don't study that much but now, wow it really changed me! I hope you make more applications like this.🙂🙂🙂	5	0	3.5.2.1	2022-06-01 13:11:46	Thanks for your review. We're happy to hear Habitica has been so helpful for you! If you’d like to share any feedback with us directly, you can do that via Menu - About - Support - Send Feedback. Keep up the studying and good work!	2022-06-06 01:23:54
118	89ba1c1e-eba1-4b9e-8aae-6660b9153ffb	Wendy Mejia	https://play-lh.googleusercontent.com/a-/AFdZucos2-SA0h2JDW03H2HDKMkUXfwuB00wsz395VcmUA	Great potential, but ultimately pointless for me as it won't send me the reminders to complete my tasks unless I open the app in the morning and even then some won't trigger.	2	1		2022-05-31 16:35:35	Thanks for using Habitica. There's a support ticket open right now for fixing notification sounds, so we're hoping to have that fixed as soon as possible. Please let us know if you're still having trouble via Menu - About - Support - Report a Bug. A direct report will provide details that will help the team fix the issue.	2022-06-06 01:27:25
119	a60c58fb-7eb5-4dce-8f4f-c91df0b7eb9d	Stine Forss	https://play-lh.googleusercontent.com/a/AItbvmlud5-G8v7b8YqPtKihfU80rskF7ufEwGk_Xri2=mo	I love this. This really helps and makes stuff you dislike, like. One thing that did bug me is the paid rewards. I think there should be a donation system where you get your money.	4	0	3.5.2.1	2022-05-28 12:46:08	Thanks so much for your review. We're happy to hear Habitica has been helpful for you! There are many rewards you can get for free, just by accomplishing your tasks. If you’d like to share any feedback about different rewards with us, you can do that via Menu - About - Support - Send Feedback.	2022-05-23 01:00:56
120	6b2ee9fd-6672-42ff-930b-2a9ad4b516d8	sharon widmer	https://play-lh.googleusercontent.com/a-/AFdZucrPOtVG4ZZbix7zP8emm87AUASxb2Z12mlIUBz7hg	This is truly the best app! It's been months and I still haven't lost interest. I particularly love to collect pets, but in general I love all of the app. I got the subscription, but also without it you can do plenty! Also, having just one member of the party having a subscrition is enough if you just want some cool and different quests. I love the flying pig, by the way. It's my favourite.	5	11	3.5.2.1	2022-05-27 16:57:14	Hi, Sharon! Thank you so much for your detailed review and for being a subscriber! We're happy to hear Habitica has been helpful for you. If you’d like to share any feedback with us directly, you can do that via Menu - About - Support - Send Feedback. We hope you and your flying pig have many fun adventures ahead of you!	2022-05-30 16:09:21
121	201f9579-074e-4906-89ec-cd0e6c3c86ce	Doctor Deebs	https://play-lh.googleusercontent.com/a-/AFdZucpOv0xcrYitgGDtAHJ2jcBOd0nAPOgrzhv8K54k	Great so far, but I have a question. I cannot figure out how to feed my pet. I know that the in-app text says to go to the "Pets & Mounts" tab, but whenever I go there I don't see food, nor do I see an option to feed my pet when I click on them. This may be important: I only have the Special Pets, so I don't know if feeding them is different or nonexistent.	5	0	3.5.2.1	2022-05-27 14:32:11	Special pets don't require feeding! So you're all set with them. If you hatch any of the pet eggs, feeding those pets will help them grow into mounts. Thanks for using Habitica. Happy adventuring and growing your stable!	2022-05-30 16:07:24
122	de39531c-6a3b-4e3b-8b8d-eee836cfed85	RTM Vivi Qiran	https://play-lh.googleusercontent.com/a-/AFdZucoR-v-fj3P56k-JBCGIZcvZ0stUOHPqTWxdpPNJKQ	Lagu diantara gadis Amira Berakas volume Kota Kinabalu Pantai Jerudong Specialist Centre	5	0		2022-05-26 11:31:07	Thank you for the review and rating. We hope you continue to enjoy Habitica.	2022-05-30 16:05:45
123	f1e809cb-67cf-4585-95a0-36df86514671	pola samier wahsh	https://play-lh.googleusercontent.com/a-/AFdZucrHA0I3aBPkJRmB_d5uhg4SvOjXm0mgatCMbP4m	Amazing	5	0		2022-05-25 22:51:14	Thanks so much for your review. We're happy to hear you're enjoying Habitica! If you’d like to share any feedback with us directly, you can do that via Menu - About - Support - Send Feedback.	2022-05-30 16:05:18
124	8b84e44a-0fb6-40b9-8c4d-f6391134dc0b	Stevee Altenbernt	https://play-lh.googleusercontent.com/a/AItbvmm5oiJSGWRo7kaWmnLkIQ1l-DBGaBHQZTw4Sh9r=mo	I really like this app, I just can't figure out how to edit or delete individual tasks?	5	0	3.5.2.1	2022-05-25 13:37:04	Hi, Stevee! Thanks for using Habitica! You should be able to edit and delete tasks by selecting them. Check out the Help section, the FAQ, and the wiki to learn more Menu - About - Help & https://habitica.fandom.com/wiki/Habitica_Wiki Let us know via Submit a Bug if you're still unable to edit/delete your tasks.	2022-05-30 16:04:13
125	9c86aee4-e00d-470d-bda6-d60adf3942f2	Dave Ag	https://play-lh.googleusercontent.com/a/AItbvmlvlcG9cShSkSjdYy7He6AdZyS81BI6IBXLMy9c=mo	Absolutely love it, I have used habitica more than any other task management app	5	0	3.5.2.1	2022-05-25 11:59:17	Hi, Dave! Thanks so much for your review. We're happy to hear Habitica has been useful for you! If you’d like to share any feedback with us directly as you continue to use it, you can do that via Menu - About - Support - Send Feedback.	2022-05-25 12:43:15
126	abe975ec-3e0f-4691-ba83-b6f130649729	Gronk The Orc	https://play-lh.googleusercontent.com/a-/AFdZucqlPvXcg__EOarRwxfiCjD8FF_cujPIU04gawhnBQ	A very good app for tracking your habits, though one of my criticisms is that the app itself is too gamey for my liking. The point of having habits is to stick to them not to be distracted by a game.	4	0	3.5.2.1	2022-05-24 16:18:50	Thanks so much for your review. We're happy you like Habitica, but sorry if the gamification aspects aren't your favorite. If you’d like to share any feedback with us directly about this, you can do that via Menu - About - Support - Send Feedback.	2022-05-25 12:44:13
127	07b802b6-744a-4340-a31c-07defb1da376	Login PC	https://play-lh.googleusercontent.com/a-/AFdZucqbBfuE5KkI6p1zFkP-PblnMwZHkGcZrJCkoDo2Jw	Easily the best game planner. Keeps getting better and better. Used it for 5 years.	5	0	3.5.2	2022-05-24 04:54:53	Thanks so much for your review. We're happy to hear Habitica continues to be useful for you after 5 years! If you’d like to share any feedback with our team directly in the future, you can do that via Menu - About - Support - Send Feedback.	2022-05-25 12:45:41
128	19cb6735-945d-4f21-bddc-aac20435ea74	Devin Brown	https://play-lh.googleusercontent.com/a/AItbvmkwbxISOtOZKAEsE6X7vmkf9rJfgFPzR-mjsIxt=mo	Surprisingly motivating. It literally turns things you don't want to do into fun experience points	5	0	3.5.2.1	2022-05-23 21:41:51	Hi, Devin! Thanks so much for your review. We're happy to hear Habitica has been fun and motivating for you! If you’d like to share any feedback with us directly, you can do that via Menu - About - Support - Send Feedback. Happy adventuring!	2022-05-25 12:49:10
129	6838133e-9bd5-421f-9c0f-cab9f6c961bb	Dhvanit Monpara	https://play-lh.googleusercontent.com/a-/AFdZucrUpwFy5VjPKHaGh7cizR23TgDf0LHCg9GCx76e	I like it's concept	5	0		2022-05-23 03:08:29	Hi, Dhvanit! Thanks so much for your review. We're happy to hear you like Habitica's concept! If you’d like to share any feedback with us directly, you can do that via Menu - About - Support - Send Feedback.	2022-05-25 12:49:46
130	63a87d1a-d05a-4875-a71a-a5ff15bdc88e	Ammonir Monir	https://play-lh.googleusercontent.com/a/AItbvmlkdk1Ld8FukJoNX67D-tImzymGtcDAQ3KYU3f3=mo	This game is what ever you make of it. You have so many different possibilities. I thank the creative people who thought of and had the willingness to make this game.	5	0	3.5.2.1	2022-05-22 18:31:29	Thanks so much for your review. We're happy to hear how much you're enjoying the gamification part of Habitica! If you’d like to share any feedback with us directly, you can do that via Menu - About - Support - Send Feedback.	2022-05-23 00:52:00
131	ff054de9-73a6-46fb-9acd-e10dc24bd6f2	Solo Boo	https://play-lh.googleusercontent.com/a-/AFdZucp-hkkbx_0zMIS5bt2u7kLklgVDAKVDRv2CV2q4Gg	Really fun to use. Motivates me to do my tasks so I can level up.	5	0	3.5.2.1	2022-05-22 00:11:18	Thanks so much for your review. We're happy to hear Habitica has been motivating for you! If you’d like to share any feedback with us directly in the future, you can do that via Menu - About - Support - Send Feedback.	2022-05-23 00:52:18
132	21440abe-1259-47c3-9232-ceff8f2de579	Rafael Ceriz	https://play-lh.googleusercontent.com/a-/AFdZucrnrVL-q5aK57SB34W1gRNX5VWEEYiBQGjptEzElA	The various methods of task management (habits, dailies, to-dos) and their parameters are excellently designed, as is the UI in general. It's all very easy to set up, and rewarding to use. My biggest gripe is more of a personal preference which many might not share: the RPG-like mechanics of hatching monster eggs, feeding your pets etc can be a bit bothersome (and kinda tacky tbh), and I find the…	4	20	3.5.2.1	2022-05-21 12:26:49	Hi, Rafael! Thanks for using Habitica. We're glad to hear it was easy, fun, and useful for you! Sorry the pets aren't a motivating factor for you, but we hope that other aspects of the app keep you working on those real life tasks of yours!	2022-05-23 00:55:25
133	33cce56e-6ce1-4108-a4fa-b51294e703f0	Clam Copeland	https://play-lh.googleusercontent.com/a/AItbvmlYaWRP5USgqmhhndjH2MmuQVen10eb7l5_LaoZ=mo	i want to use the to-do page, but it feels unsatisfying because the tasks always turn red in a few days, so your to-do page can easily become a wall of red that you don't want to look at. it would be much better if they only turned red when they're past the due date. a fairly small complaint, the app is very good	5	3	3.5.2.1	2022-05-21 04:29:42	Thanks so much for your review. We're happy to hear Habitica has been helpful for you! If you’d like to share feedback with us about task deadlines and coloring, you can do that via Menu - About - Support - Send Feedback.	2022-05-23 00:56:24
134	557d0ec9-64ce-46e8-af19-0e038a588e7b	Michelle M	https://play-lh.googleusercontent.com/a-/AFdZucpwIR-r1y9LtkEUwDq2WIPwOx7Jq2Mxr0_QagFbPg	It would be nice to be able to check out the app before signing up. I don't want to make an account for yet another app if I don't end up using it.	3	0		2022-05-21 00:04:54	You can browse through different aspects and features of Habitica on the wiki to see if it's the right fit for you at this time: https://habitica.fandom.com/wiki/Habitica_Wiki	2022-05-23 00:57:20
135	8a236908-ab66-49a7-a753-23cf5eea90ba	A Anders	https://play-lh.googleusercontent.com/a/AItbvmkIN6IHhRXXEgJVKWK1RlZcoKZbtGgNIpuJMN0W=mo	Stop wasting time gamifying stuff thay doesn't need to be gamified and go do your habits instead of this game	1	0		2022-05-20 09:30:26	Sorry to hear that Habitia wasn't a good fit for you right now. Thank you for trying it out. We wish you the best in getting your tasks and habits accomplished!	2022-05-23 00:58:26
136	ab5a7c56-d9f0-4be7-a10e-3cc38a53cb16	Dead Cant	https://play-lh.googleusercontent.com/a/AItbvml4YvsNmFxiRpJpBHyUwX8qHrmrs2xK-1mdjz9N=mo	I've been using Habitica for about two months now and I've found it to be incredibly useful in helping better structure my daily routine. The interface is user friendly. I appreciate the balancing of keeping track of goals doesn't foster a habit in sinking too much time into the app.	5	0	3.5.2.1	2022-05-20 02:10:56	Thanks so much for your review. We're happy to hear Habitica has been helpful for you in setting up a daily routine! If you’d like to share any feedback with us directly in the future, you can do that via Menu - About - Support - Send Feedback.	2022-05-23 00:59:20
137	e8d25de5-46f8-4e44-a3c7-08dac1aef722	Magnum Myte	https://play-lh.googleusercontent.com/a-/AFdZuco07SmlwcU6PR4ahM094laEKLCythpx1KdqAsa5sA	Exceptional	5	0		2022-05-19 18:15:51	Thanks so much for your review. We're happy to hear you are finding Habitica to be exceptional! If you’d like to share any feedback with us directly, you can do that via Menu - About - Support - Send Feedback.	2022-05-23 01:01:23
138	5a05f4bc-145d-416b-b801-de4bf32a16c8	Brianna Hope	https://play-lh.googleusercontent.com/a/AItbvmnZjlZgde0I-QH5LuLvotTL08g_9K7bVc4tnXVDNw=mo	Has done a miraculous job getting me to do the things I never used to do. I have terrible self control so having this means I have developed a much more healthy lifestyle and complete the tasks I need to complete on time.	5	0	3.5.2.1	2022-05-18 19:16:28	Thanks so much for your review. We're happy to hear Habitica has been helpful for you! If you’d like to share any feedback with us directly, you can do that via Menu - About - Support - Send Feedback. Happy adventuring and working on those healthy lifestyle habits!	2022-05-23 01:02:27
139	9343ccfb-e843-4d7d-9e29-84d63b59bb5e	Gabriel Marcotte	https://play-lh.googleusercontent.com/a-/AFdZucr780vhgey_8BraoBJmaPynpwchf6W0IxuyW8Pqwg	I really like the UI but the reorganization of tasks is a little messed up. Otherwise it's awesome!	4	0	3.5.2.1	2022-05-17 23:30:37	Hi, Gabriel! We are glad to hear you're enjoying Habitica. If you are still having trouble with task reordering, please let us know at Menu - About - Support - Report a Bug so we can see if we can fix it for you.	2022-05-23 01:05:49
140	4fe144d8-926b-431a-84ed-f864c3a59239	Jenny Ly	https://play-lh.googleusercontent.com/a-/AFdZucqk-03iw8S_uPjkTQdy4XYDrS15RRjH4oXnTz0GXw	Great game until you have one bad day and essentially if you lose all your health they take away a level, all your equipment and gold. Pretty bad game mechanics, made me feel so bad I honestly just deleted it there. The game is suppose to be made to support you but really is made to work hard to get nothing and if you slip up you get it all taken away. Don't use if you are even slightly sensitive…	2	0	3.5.2.1	2022-05-17 21:49:56	Hi, Jenny! Thanks for using Habitica. You shouldn't be losing this after missing one day. Please reach out to our team via Menu - About - Support - Report a Bug.	2022-05-23 01:07:28
141	0ed37cf9-e2b7-4d4c-b898-d137849e71c3	Sen Rose	https://play-lh.googleusercontent.com/a-/AFdZucrn1UWcsTS9zdelivPRWjoy2uyn2ML4ZoujfYzSn1g	Seems cool but my reminder notifications are not turning up even though my notifications for the app are on 😣	2	0	3.5.2.1	2022-05-17 18:07:34	Hi, Sen! Thanks for using Habitica. There's a support ticket open right now for fixing notification sounds, so we're hoping to have that fixed as soon as possible.	2022-05-23 01:07:52
142	304bdb96-6d90-45ca-8eff-c622abc36d3c	preternatural	https://play-lh.googleusercontent.com/a-/AFdZucqa3rMWr7NkPgeJizClITgA6jAv7m7mP_gGZzVX8w	i love that it's gender neutral, but can u pls add more feminine options ? especially the hair ! (i have pastel pink hair) i love the concept, but i wish there was a version with a bigger focus on the dress up aspect (and prettier options). that would be my ideal app !	3	0	3.5.2.1	2022-05-17 14:45:55	Thanks for using Habitica! Pastel pink hair (and dozens of other hair colors) are available to purchase with Gems throughout the year during various galas. Be on the lookout for them if you want more options for customizing your avatar!	2022-05-23 01:10:34
143	31111a6f-eeac-4945-b20d-1151bf567ab1	Yash Choudhary	https://play-lh.googleusercontent.com/a/AItbvml8o8W-Y7sOvdbQiGV0NJO_gBGVazaNcIQiJdOr=mo	Please add a progress bar feature as well. To note the progress of a task.	4	0	3.5.2.1	2022-05-17 05:20:43	Thanks so much for your review. If you’d like to share any feedback with us directly, you can do that via Menu - About - Support - Send Feedback. You might also think about adding subtasks to a task so you can check off some of them and note your progress as you go that way.	2022-05-23 01:13:37
144	7d8f5042-42d1-41cd-a394-d34ae973b709	Jason Navarro-Moreno	https://play-lh.googleusercontent.com/a/AItbvmnaw6S3vwDgPi-GOdhvRMRrgw8I5-Oy5-DI7lIR=mo	Very nice	5	0	3.5.2.1	2022-05-16 01:50:28	Hi, Jason! Thanks so much for your review. We're happy to hear you think Habitica is very nice! If you’d like to share any other feedback with us directly, you can do that via Menu - About - Support - Send Feedback.	2022-05-23 01:14:05
145	40c480fa-4c30-4bf3-bbe6-d4c76e7100fb	Bizniss Dood	https://play-lh.googleusercontent.com/a/AItbvmmmk_yF5BkM5AnljmFMEPa7Vqbj26_h8iHaGqxM=mo	Fun easy way to manage everyday habits and scheduling. Gets repetitive sometimes, but it's very helpful.	5	0	3.5.2.1	2022-05-15 16:26:50	Thanks so much for your review. We're happy to hear Habitica has been fun as well as helpful for you! If you’d like to share any feedback with us directly, you can do that via Menu - About - Support - Send Feedback.	2022-05-16 01:06:43
146	9e222171-7b71-428d-b27e-b0c69fd882a6	RAHUL KAWAD	https://play-lh.googleusercontent.com/a/AItbvmlE47uhwrEqtOqAV8lrh6qfIUSJB-D6eVsAQ_vqhg=mo	There are lot of bugs in the app and it is a little complex to use.	1	0	3.5.1.3	2022-05-15 15:40:41	Sorry to hear you encountered a bug. Please let us know if you're still having trouble via Menu - About - Support - Report a Bug. A direct report will provide details that will help the team fix the issue. You may find the resources at Menu - About - Help and FAQ helpful if you're having trouble using the app.	2022-05-16 01:07:57
147	3558071c-6bed-4e5e-9f87-1465acc3b708	Yousef Al-Hadhrami	https://play-lh.googleusercontent.com/a-/AFdZucqs-qJceF0TsI7Sb7qwYj4HdcYVww29A5G52QY5TUc	No ads, open source and does really help track your habits I have a party doing quests with my fiancee and siblings It's motivational, I've been using it for several months	5	0	3.5.2.1	2022-05-13 15:38:42	Hi, Yousef! Thanks so much for your review. We're happy to hear Habitica has been helpful for you and members of your family! If you’d like to share any feedback with us directly, you can do that via Menu - About - Support - Send Feedback.	2022-05-16 01:11:27
148	44301839-2a4b-4ccb-a71a-14cc7aefeb32	Rivado Shido	https://play-lh.googleusercontent.com/a-/AFdZucoFGNNX0B9xXpccWwlrjVDueYOctO1D28XeSXAGgMQ	The best productivity app ever. It's simulate the feelings of doing fun daily chores or daily quests in games, you always feel rewarded or punished if you dont do it	5	0	3.5.2.1	2022-05-13 03:54:10	Hi, Rivado! Thanks so much for your review. We're happy to hear Habitica has been rewarding for you! If you’d like to share any feedback with us directly in the future, you can do that via Menu - About - Support - Send Feedback.	2022-05-16 01:12:02
149	afae2116-71b0-48e7-a94f-328e9589231b	Andrew Ross	https://play-lh.googleusercontent.com/a-/AFdZucofjDMJZWEqUh2UF1SDlOu_yRirVL017Phjvz1E	I love the idea of this app and I've been using it a lot but what bothers me the most about it is the coin distribution and the distribution of information about the app. I've set my habits, to-do lists etc and I've been checking in and ticking them off consistently and yet I've died three times from losing health. I had to Google how to buy health. When I first died I lost lots of coins because …	3	0	3.5.1.3	2022-05-12 21:57:35	Hi, Andrew! Thank you so much for this thoughtful review. We'll keep your feedback in mind as we continue to work to improve Habitica. You can send us feedback and requests directly by going to Menu - About -Support - Send Feedback.	2022-05-16 01:13:07
150	3a0799d6-6d3d-4886-83a3-7635e3047f19	Doni Kun	https://play-lh.googleusercontent.com/a-/AFdZucp7aZiiQrO0q2v1hWVvXRTw_-b7nausiYggZEpvTg	Отлично для того, чтобы упорядочить свою жизнь, все получится если следовать своим же правилам. Предлагаю сделать древу навыков с атрибутами, ветками и навыками. Через атрибуты строятся ветки(владение мечом, единоборства, баскетбол, чтение книг, математика, и т.д.), которые пользователь создаст сам для того, чтобы видеть свой прогресс. Навыки тоже создаются пользователем, к примеру изучить какой …	5	0	3.5.2.1	2022-05-12 13:40:41	Hi, Doni! Thanks so much for your review. We're happy to hear Habitica has been helpful for you in streamlining you life! If you’d like to share any feedback with us directly, you can do that via Menu - About - Support - Send Feedback.	2022-05-16 01:14:47
151	096829d0-3952-4877-9f26-ab1a39e2aedc	Mario Rodriguez	https://play-lh.googleusercontent.com/a-/AFdZuco71C9hw_NtrCU806h5hiB6f6xhqmCzStzMxTzjrw	Its great productivity app but not the one that motivates me or to fun to use personally. The game theme is cool but not one I enjoy. I like the original task apps better with all neat features since this one doesn't really have any.	3	0		2022-05-11 18:09:50	Hi, Mario! Thank you for your review. We're sorry to hear Habitica didn't fulfill your needs at this time. Thank you for giving it a try!	2022-05-16 01:16:47
152	4d9f1fbb-287e-4932-9a53-c27efb2667ca	Jayde Walsh	https://play-lh.googleusercontent.com/a-/AFdZucqm0FMv8Db8e_bXIOqsDVnvntm6hv4K5ARN4Ww3Xg	This lets you complete chores and tasks in real life and make a game out of it!	5	0		2022-05-11 14:02:23	Hi, Jayde! Thanks so much for your review. We're happy to hear Habitica has been helpful for you in having fun while completing your real life tasks! If you’d like to share any feedback with us directly, you can do that via Menu - About - Support - Send Feedback.	2022-05-11 14:31:16
153	410bc086-12c6-46b9-9ba8-6cfa043e7162	Valerio Volpi	https://play-lh.googleusercontent.com/a-/AFdZucoMtXnJ3LU3UnIK7DBrHg5ds3DeIA9wkE_17ms3QA	Very cool app for procrastinators and RPG lovers. I would just love to have a few additions. On the 'to do' list, divide into main quests and side quests. This way we can have a list of important things, such as work tasks etc, and the side quests can be smaller tasks like cleaning the house. Also it would be nice to schedule reminders and deadlines in an hourly way. Like getting a notification t…	4	24	3.5.2	2022-05-11 09:10:08	Hi, Valerio! Thanks so much for your review and feedback. We now have an official suggestion and comment form to help us keep track of what features users want the most. You can find it via Menu - About - Send Feedback if you’d like to add your ideas.	2022-05-11 14:32:19
154	27b961f5-6b44-4e02-ade8-90e3ad68a227	Fake Name	https://play-lh.googleusercontent.com/a/AItbvmmwIMV6PlVWHJoI5zSvhmZBs1UyP30qfNPFCZaw=mo	hg	5	0	3.5.2	2022-05-10 21:29:16	Thank you for your rating. If you’d like to share any specific feedback with us directly, you can do that via Menu - About - Support - Send Feedback.	2022-05-11 14:33:03
155	65e2e405-bf90-4d0c-9f7a-50cc332eed13	Big Manz Stewie	https://play-lh.googleusercontent.com/a/AItbvmm-UkomoT3k4EDKL_JT9aj7jGTzhCkWSsjBdoHO=mo	I have never met an app more useful for my adhd, there is a category for every kind of task, love the rating and checklists too	5	0	3.5.2	2022-05-10 09:58:22	Thanks so much for your review. Hearing feedback like this means a lot to us. We're happy to hear Habitica has been useful for you! If you’d like to share any feedback with us directly, you can do that via Menu - About - Support - Send Feedback.	2022-05-11 14:33:56
156	9a4ec733-5a7d-49a9-80ae-78dea89ad438	Coriander B	https://play-lh.googleusercontent.com/a-/AFdZucrzvWt-xlhtifpB4KhfS34Ix9BbSaXhoOAh-7S9Vw	I found myself writing to do lists all over my arm and on random paper, very disorganized and hard to keep up with. It was stressful and a lot of times i didnt feel like i did everything i needed to. This app is awesome cause now all my random to dos can be in one place AND organized into categories. Super helpful to ocd and keeping track of those long term projects. as an artist i have a lot of …	5	38	3.5.2	2022-05-09 21:23:47	Hi, Coriander! Thanks so much for your review and rating. We're happy to hear Habitica has been helpful for you! If you’d like to share any feedback with us directly in the future, you can do that via Menu - About - Support - Send Feedback. Keep up the great work!	2022-05-09 22:35:36
157	854be83b-c3c9-402e-9153-8aeaab4d9485	Josh Young	https://play-lh.googleusercontent.com/a-/AFdZucrBFEhIrtLyVjISwIm97bSIM_iybkMCwY-qW7YT9HA	I REALLY REALLY LOVE this app! This really keeps me up and running for tasks that I really dislike doing but have to do. Just a little thing to ask? DEVS please! Make an offline mode for this app, and I'm also experiencing a bug where everytime I try arranging tasks manually by row, they teleport to another row... Otherwise everything else is really handy dandy!	4	21	3.5.2	2022-05-09 04:18:22	Hi, Josh! Thanks for taking the time to leave a review, and sorry to hear about the trouble with task reordering! There's a manual change we should be able to make to fix that for you if you go to Menu - About - Support - Report a Bug. Thanks again!	2022-05-09 22:39:05
158	d23b2bdb-22c7-4c51-9f82-7d8e012c657a	3lectr6	https://play-lh.googleusercontent.com/a-/AFdZucpvbZingA0iGtUpYFqD3YzYsIFfIZjJ9nH758WGQg	Okay I usually don't leave reviews but first, this is already amazing. I just started character customization and they let you pick out a wheelchair! Most other games would never include this.. this means alot so I can make my character look like me. It is also fun that I get to have "pets" while I make sure I'm doing what I actually need to do in real life.	4	0	3.5.2	2022-05-09 03:51:13	Thanks for your review and kind words. They mean a lot to us! We're glad you love the fun pets and the wheelchair customizations, too! If you'd like to share any further feedback, please feel free to reach out via Menu - About - Support - Send Feedback. Happy adventuring!	2022-05-09 22:40:26
159	a3372c54-0803-47c1-b135-ea9a67c7c89a	pankaj vaishnav	https://play-lh.googleusercontent.com/a-/AFdZucqgoB2LiH8Wvl33pTcI1ukmQqdp9RqfRM2t0oqOHw	It is very complicated app	3	0		2022-05-08 12:50:34	Sorry to hear you’re having trouble learning to navigate Habitica! You may find the resources at Menu - About - Help and FAQ helpful. There's also a useful wiki here: https://habitica.fandom.com/wiki/Habitica_Wiki	2022-05-09 22:41:11
160	4976192c-6a25-4804-9de2-4ce6f31c8be9	Nataniel Farzan	https://play-lh.googleusercontent.com/a-/AFdZucrrASRmGt7pIMUzJOEniVNaBYu0yz86MudctgxVs18	This app is really useful and has definitely helped motivate me to create better habits. The modern design is beautiful as well. I would definitely recommend Habitica for those who want to form good habits, get rid of bad ones, and have fun along the way! Gamifying tasks and habits really works!	5	10	3.5.2.1	2022-05-08 04:55:41	Hi, Nataniel! Thanks so much for your review. We're happy to hear Habitica has been helpful for you in creating good habits! If you’d like to share any feedback with us directly, you can do that via Menu - About - Support - Send Feedback. Happy adventuring!	2022-05-09 22:42:36
161	38ee43f9-0a64-41ea-85ff-927b5b94bdfa	Eric Lazarte	https://play-lh.googleusercontent.com/a/AItbvmlniWg9POws3YMiS2MucwtUM-Yw5OfJ81ncbI13=mo	Beautiful app. Helped me improve in several things. Recommended 100%	5	0	3.5.2	2022-05-07 14:16:06	Hi, Eric! Thanks so much for your review. We're happy to hear Habitica has been helpful for you! If you’d like to share any feedback with us directly, you can do that via Menu - About - Support - Send Feedback.	2022-05-07 14:47:54
162	8f6cea98-a255-4d6a-bd11-f1c6870edde8	Solstra Marie	https://play-lh.googleusercontent.com/a-/AFdZucopkchPG9X3t4I3fCbu2m_ZjLgKX5-ISWDNxbmYpQ	I deeply recommend this app. It's helped me organise in a fun easy way! Plus the people are lovely once you get your footing in the features and chats/guilds!	5	0	3.5.2	2022-05-06 22:04:29	Thanks so much for your review. We're happy to hear Habitica and its community have been helpful for you! If you’d like to share any feedback with us directly, you can do that via Menu - About - Support - Send Feedback.	2022-05-07 14:48:57
163	035326ca-5f31-4196-abe1-deb983fd7ebe	L. L.	https://play-lh.googleusercontent.com/a-/AFdZucpkvg5H-CqY8JIQAUB2U69QYm1MZDdcZjVJpIO1Uw	This was the exact app I was looking for. I was actually thinking of creating my own until I saw this. No need spending hours on coding now. 😆. Loving the SNES RPG style characters. Best part is that there are no ads (that I've seen so far). I feel like the engineers really took their time designing this app to help others. Impressive enough for me to write my first review ever (I think) in the G…	5	0	3.5.2	2022-05-06 15:50:02	Thanks so much for taking the time to leave your enthusiastic review. We're happy to hear Habitica has been helpful and fun for you! If you’d like to share any feedback with us directly, you can do that via Menu - About - Support - Send Feedback.	2022-05-07 14:49:39
164	999289e6-69c4-4272-8d56-39c7af81d4b2	Naomi R	https://play-lh.googleusercontent.com/a-/AFdZucpM2oP7S-bXVIdfP2THTVl71NgUSNbPzHpcm0qzUxU	Great app, slow progress	4	0	3.5.2	2022-05-06 10:17:20	Thanks for your review. We're happy to hear you enjoy Habitica. You might think about adding more tasks or joining a party if you want to progress faster. Happy adventuring! If you’d like to share any feedback with us directly, you can do that via Menu - About - Support - Send Feedback.	2022-05-07 14:53:58
165	c4c326cb-8e2a-4d9f-ae4b-39d6e85efcc9	Null Cerberus	https://play-lh.googleusercontent.com/a-/AFdZucqTLQIH64Flr_ijGsNxXryALpKI_EMG0yNWG06hwQ	It's an okay app, but it isn't usable offline. That's the only downside.	3	0		2022-05-05 23:07:28	Thank you for your review! We plan to add offline mode in the future. In the meantime, if you’d like to let us know what features you’d use the most offline, you can do so via Menu - About - Support - Send Feedback.	2022-05-07 14:54:50
166	55606ea1-6373-474b-b8c2-bab2f7b1192b	Siddhant Ojha	https://play-lh.googleusercontent.com/a-/AFdZucqIqIKUNPG8nxO-Q7ajHDPLihmPm9iiNouVKNgGWg	Cool app, unique design and style. Good for gamers. However your app doesnt work offline, everytime i turn off internet and open the app to check off dailies it simply crashes and i had to relaunch it again. Also, the entries which i give while offline it doesnt save that when opened online. Please fix. Overall really innovative app.	3	4	3.5.2	2022-05-04 15:44:41	Thank you for your review! We plan to add offline mode in the future. In the meantime, if you’d like to let us know what features you’d use the most offline, you can do so via Menu - About - Support - Send Feedback.	2022-05-07 14:58:16
167	bf24a269-3188-45bd-a79d-f2f46762776c	Vân Hải	https://play-lh.googleusercontent.com/a-/AFdZucpzayyrPogB6soGpiIdXwr-5jW_r58TG_rKxZrR	It motivates me to build strong habits and it's very fun as well :)	5	0	3.5.2	2022-05-04 12:35:06	Thanks so much for your review. We're happy to hear Habitica has been helpful as well as fun for you! If you’d like to share any feedback with us directly, you can do that via Menu - About - Support - Send Feedback.	2022-05-07 14:58:43
168	994c4b4f-d512-4eeb-933c-0b16bdca05db	A Rose	https://play-lh.googleusercontent.com/a-/AFdZucqzF4ReQXey7m5XoOFXnrYa5X-Ovt_0LjorWuq5	*Edit - 2 months on and still loving the app and using it every single day without fail! Loving the drops and how much equipment you can get. Being part of a team has made me feel less socially isolated and valued too! Can't praise this app enough! Original review: Fantastic app that makes the daunting and the dreary more achievable and - dare I say it - even enjoyable! This past week has been th…	5	5	3.5.2	2022-05-04 09:47:57	Thanks so much for your review and rating. We're happy to hear Habitica has been motivating for you! If you’d like to share any feedback with us directly, you can do that via Menu - About - Support - Send Feedback.	2022-03-11 16:23:54
169	1441e63e-9048-41bc-9031-c02b9c8c2927	Anonymous Viewer	https://play-lh.googleusercontent.com/a-/AFdZucp7ie4jSIf8q4iaGQV64RyBoGhWKpE0cFXg-Y9n	I hope you don't ignore this feedback The concept of the app is great but it lacks a lot of things 1. I wanted to see my streaks in my habit and my daillies can you please add a graph of productivity and a callendar that checks whenever I've done my daily 2. Can you add dalliy or nightly feedback journal Please don't make it a premium version though I'm fine with ads	1	1	3.5.2	2022-05-04 04:36:38	Thanks for your review! We’re working on graphs and stats right now and hope to add them soon! In the meantime, you may find the Data Display Tool one of our devs created helpful: https://oldgods.net/habitrpg/habitrpg_user_data_display.html If you’d like to share feedback with us directly, you can do that via Menu - About - Support - Send Feedback.	2022-05-07 15:03:41
170	815c10c2-fee4-421d-ba18-8d45616b7601	Adriana Jayasinghe	https://play-lh.googleusercontent.com/a-/AFdZucr3kMEa8W2fmJ_423LXohqEabzJkGmEdSnnc1zQWw	Amazing!	5	0	3.5.2	2022-05-03 16:08:24	Thanks for your review. We're happy to hear Habitica has been amazing for you! If you’d like to share any feedback with us directly, you can do that via Menu - About - Support - Send Feedback.	2022-05-07 15:07:30
171	3c622952-8e1b-40a8-a3b1-0cd7f815ab6a	Selah Hamilton	https://play-lh.googleusercontent.com/a-/AFdZucoZ2MbZ1mH6Q1E6kWf9E7sGqzJme0BnRoslUnuVhg	I really like this app, it's very fun and helpful. Love that there's no ads. Wish there was a better way to organize tasks, but I think there's mods I can use to do that, I must go find them. The search option is broken but refreshing the app works. And the reminders don't go away if you do the task. But other than minor things. Thank you so much for making this, Habitica team. 10/10 highly recom…	5	46	3.5.2	2022-05-03 06:21:16	Hi, Selah! Thanks so much for your review. You should be able to reorder your tasks so they appear in whatever order you wish. If you find you can't reorder your tasks, please let us know by submitting a bug report via Menu - About - Support - Report a Bug.	2022-05-07 15:09:02
172	05941842-37cc-49b4-b8f8-aa343c55a3e1	Jeremy Ahrendt	https://play-lh.googleusercontent.com/a/AItbvmkvFWstKtWKcHZgpPKQ2409Yxco2iiOB0AC-QLX=mo	Awesome app but it closes after everything I check off my list	3	0	3.5.2	2022-05-02 20:03:00	Sorry to hear the app closed on you. If this issue persists, please reach out to admin@habitica.com so we can try to figure out what's going wrong.	2022-05-07 15:14:23
173	59e01b44-37a6-4fa2-bd95-dac535df75eb	Benjamin Jones	https://play-lh.googleusercontent.com/a-/AFdZucp5-VTaDL1367GpqyCr0aqTuXSDel4mLwFPcoLogQ	I want to love it but it crashes over and over on my pixel 6 despite reinstalling and resetting my account, and I can't use it.	1	0	3.5.2	2022-05-02 19:57:41	Sorry to hear the app crashed. If you continue to experience this, please reach out to admin@habitica.com so we can try to figure out what's going wrong.	2022-05-07 15:14:36
174	80d43756-d8da-447c-aaa7-11e02404ea05	메리	https://play-lh.googleusercontent.com/a-/AFdZucp0CqkLfZip-yMBj2MK5esYPpyFa3FTdccWEOUazvk	I literally can't get past the login/sign up page. I have tried all three ways of signing up but the app does nothing. I tried deleting cache, deleting data and even uninstalled and reinstalled but it still doesn't work.	1	0	3.5.2	2022-05-02 14:52:33	We have disabled Facebook login, if that's what you're using. We would be happy to help you gain access to your account. Please contact us via admin@habitica.com so we can help you get past that step!	2022-05-07 15:19:10
175	9ed2e406-9a78-4a9a-ae9b-161059d4ee93	Lovely Sleepy Flower Child	https://play-lh.googleusercontent.com/a-/AFdZucqXx13c2MkVfz8NNzyIv4litpFTW65UMe-_-eL5WQ	Great idea, however, needs work on the execution. I'd like to see more inclusive avatars because when I went to create mine I didn't feel represented. App is confusing and just needs a better system. When adding habits it wasn't easy to delete premade ones. App just needs some fine tuning	2	0		2022-05-01 07:13:23	We would love to hear how we can better represent you via avatar. We have wheelchairs, glasses, different body sizes, 8 default skin shades, and many hair combinations with styles and colors. Please let us know what you'd like to see via Menu - About - Support - Send Feedback. You may also find the resources at Menu - About - Help and FAQ helpful.	2022-05-07 15:32:12
176	8fc70386-a681-4841-9141-e9292f95dc0e	KT Monster	https://play-lh.googleusercontent.com/a-/AFdZucpuSgRSeXFMMewFGbgh5DXOZVldReb1Q59JfpyhaA	This app has helped me SO MUCH!! I have mental illness and chronic pain which makes it difficult for me to function at times; this app helps me keep organized and accountable. Plus it turns your chores into a game with rewards. I'm very pleased with this app. Also happy they don't show ads or try and force you to spend real money. I hope this app lasts forever!	5	0	3.5.2	2022-04-30 04:34:33	Thanks so much for your review. It means a lot to us! We're happy to hear Habitica has been so helpful for you! We're committed to keeping the app ad-free and usable for free. If you’d like to share any feedback with us directly, you can do that via Menu - About - Support - Send Feedback.	2022-05-07 15:36:26
177	91919aa8-ecb9-4d69-85f0-3c785814c7d0	Sketchflix	https://play-lh.googleusercontent.com/a-/AFdZucr1gv8_dF8LMZ92E_owJKbCmA6Y4eyKhMueP7o_Hw	So far so good. Awesome app which really forces us to complete tasks. It gets little buggy sometimes, but till the main functions are working good, I'm fine 😊.	4	0	3.5.2	2022-04-30 02:00:40	Thanks for your review! We're glad you're enjoying using Habitica. You can help us fix bugs by reporting them directly via Menu - About - Support - Report a Bug.	2022-05-07 15:37:07
178	fc712dfd-2bac-4e53-a736-0e1f9e82c97c	Jill Merryfield	https://play-lh.googleusercontent.com/a-/AFdZucq1u0KM-_zQ0US4_XpilG0WXFYnIUtaUdMz54xiHg	I wish there was slightly better navigation, like a jump to home button that takes you back a screen that shows your stats and dailies, or I mostly wish that your dailies bar on the bottom followed you from screen to screen because it's hard to navigate back to.	4	0	3.5.2	2022-04-29 11:43:10	Thanks so much for your review. If you’d like to share any feedback about navigation with our devs directly, you can do that via Menu - About - Support - Send Feedback.	2022-04-29 19:39:37
179	c0d56a6e-4e04-4061-a1c2-155cefae7fa3	Ray Jay	https://play-lh.googleusercontent.com/a-/AFdZucr1aO8dCGNadLbXyYZNErKiwSlKlHvmOCV1rau0Jn0	There are certain sections of this that disallow religion, as in making a habit of prayer, reading the Bible, etc. That is just strange and I hope they change those rules.	2	0	3.1	2022-04-28 00:56:50
180	e9e43ce3-c0e8-45ce-a3c7-469d1459c3a6	feraste	https://play-lh.googleusercontent.com/a-/AFdZucoXl4SVdKV-yE7sWxxhF5v_n6yZfmE3fz2AytwhPQ	Je l'utilise tout les jours	5	0	3.5.1.3	2022-04-25 23:41:07	Thanks so much for your review. We're happy to hear you've made a habit out of using Habitica! If you’d like to share any feedback with us directly, you can do that via Menu - About - Support - Send Feedback.	2022-04-29 19:46:38
181	1183ee38-ea57-4005-99c1-c1bab2af89b7	Stitching Kitten	https://play-lh.googleusercontent.com/a-/AFdZucql6Ets5cESK_UaAD5KL5Tfk7GyrQ6jTOqXCGlw	Really fun app, gamingfying my chores really works!	5	0	3.5.1.3	2022-04-25 23:21:15	Thanks so much for your review. We're happy to hear Habitica has been helpful for you! If you’d like to share any feedback with us directly, you can do that via Menu - About - Support - Send Feedback.	2022-04-29 19:47:04
182	17116ab3-8013-4e7a-ac0f-832fc8f7ab5a	Tyler Dušak	https://play-lh.googleusercontent.com/a-/AFdZucrtvO_b44CWiqUrFOaoaLuKr-2x_ctBUqIMwSakOQ	saved my life. perfect for neurodivergent/mentally ill people that tend to hyperfixate on mmorpgs. i feel like my life is finally going somewhere.	5	0	3.5.1.3	2022-04-25 22:07:43	Hi, Tyler! Thanks for your review. It means a lot to us to hear that it is so helpful for you! If you’d like to share any feedback with us directly, you can do that via Menu - About - Support - Send Feedback. Happy adventuring through real life!	2022-04-29 19:47:54
183	3049c80b-1eb0-4fd6-ba2b-0894be7d10ce	Valerie Rivera	https://play-lh.googleusercontent.com/a/AItbvmkcb5iBuSJF8I3GzJCnBxJmWsVjUlI7gg52oSjU=mo	I love this app so much! Not all apps like this work, they always have rip-offs. It's really fun and it helps me with my personal goals! I also love how all the pets are designed! there has been 0 problems since I started this. Thank you for making this wonderful app, it's very helpful. Totally recommend!!!	5	0	3.5.1.3	2022-04-25 05:36:56	Hi, Valerie! Thanks so much for your review. We're happy to hear Habitica has been both fun and helpful for you! And it's great to know how much you like the pets. If you’d like to share any feedback with us directly in the future, you can do that via Menu - About - Support - Send Feedback.	2022-04-29 19:49:01
184	23d9a295-3972-422a-be6f-db46a7641199	Gwen Armstrong	https://play-lh.googleusercontent.com/a/AItbvmluLUjMqhm5qgmT-_dHd7Xgy3AoE_VNSKzpB5AU=mo	If you're chronically ill, this app is bomb. It makes taking meds more fun and when you finally have energy for housework it's a lot more rewarding and makes you feel like you've been productive. That sense of accomplishment even if I just took a bath is really nice.	5	1	3.5.1.3	2022-04-24 20:56:10	Hi, Gwen! Thanks so much for your review. Hearing how much it is motivating you and helping you accomplish your everyday tasks means a lot to us! If you’d like to share any feedback with us directly, you can do that via Menu - About - Support - Send Feedback. Happy adventuring!	2022-04-29 19:50:15
185	af743016-e800-4c3a-ada5-b767c22aeb1f	Azad Kurane	https://play-lh.googleusercontent.com/a/AItbvmk5PkiPyGsemD2_1gUcf6jhelrENIRfLtOTd6RL=mo	It was great app.... Though can be better..... 1. It should keep report of our habit... 2.Shows history where we got coins and points. 3.and also increasing level of grafics	4	1	3.5.1.3	2022-04-24 08:21:45	Thank you for your review. If you’d like to share these suggestions with our devs directly, you can do that via Menu - About - Support - Send Feedback.	2022-04-24 20:19:27
186	049a18ab-125f-46d3-a1bd-1608a8ba124d	It's Ya Boi	https://play-lh.googleusercontent.com/a-/AFdZucrdv2b6BjJdlQmpPiIKNjt3ZVR019C1-9-IsdjW	Please add an undo button. I accidentally hit the tasks all the time which made me to avoid the mobile app all together	3	0	3.5.1.3	2022-04-23 14:15:40	Thanks for your review. If you use the filter settings to look at your finished/completed To Dos, you can uncheck any to dos you might accidentally have marked as completed (essentially an undo). And you can uncheck any tasks you might have accidentally checked.	2022-04-24 20:22:52
187	d3307621-3c37-4a21-944e-603b81131424	keananjs	https://play-lh.googleusercontent.com/a-/AFdZucq6XVl6sEToLnCUe3XyIoHvrSraYYwiOT6sxPcbDQ	Great app, but it takes some time to load the To Do List tasks. Don't know if it's just my phone or if others have the same issue though.	4	1	3.5.1.3	2022-04-22 09:31:07	Thanks for using Habitica! Please let us know if you're still experiencing long load times for that screen at Menu - About - Support- Report a Bug. Our devs are already working on load times, but more data might help them solve issues like this more quickly.	2022-04-24 20:25:11
188	57874b4e-30f2-4dde-b854-95fe3db08cb0	Amber Bishop	https://play-lh.googleusercontent.com/a-/AFdZucozM4D4xsPWo_TV8WZ5HUqvaCh4S2zYhvpYQqJu	Makes my day a bit easier scheduling this year etc	5	0	3.5.1.3	2022-04-22 02:06:27	Hi, Amber! Thanks so much for your review. We're happy to hear Habitica has helped your day become a little easier! If you’d like to share any feedback with us directly in the future, you can do that any time via Menu - About - Support - Send Feedback.	2022-04-24 20:25:58
189	ab6a56e5-c21d-4f1c-9445-ea77bc76282e	RJH 91685	https://play-lh.googleusercontent.com/a-/AFdZucoeASc3u2RDntFBu297ea0d9ck35g1WsIIM9LM	Could be great - Held back by a very restricted shop and saturated by premium currency items.	3	1	3.5.1.3	2022-04-21 19:38:17	Thanks for the review. All items that can be obtained with gems are cosmetic, and quests can be shared with partymates. There are also a number of ways to earn gems without using money- you can read more about them here: https://habitica.fandom.com/wiki/Gems#Obtaining_Gems_for_Free	2022-04-24 20:27:55
190	af1ae86b-9176-4710-8144-360899b2d983	Abhishek Abhi	https://play-lh.googleusercontent.com/a-/AFdZucqcGTBX7n7VDecydDyzOXfnZd_IsA35OqL2uQdw5g	Please add a pomodoro timer with a rewarding system. Overall this app is just awesome!	5	1	3.5.1.3	2022-04-19 17:12:04	Hi, Abhishek! Thanks so much for your review. We're happy to hear how much you're enjoying Habitica! We now have an official suggestion and comment form to help us keep track of what features users want the most. You can find it via Menu - About - Send Feedback if you’d like to add your ideas.	2022-04-24 20:31:39
191	61c32c25-e2ca-400d-8992-82c3dae2ab48	H_eroS	https://play-lh.googleusercontent.com/a-/AFdZucqy9Nm-GKNUMt4JJsLsoBmY7ObsdBy8AWzLlPaTtQ	Great app for keeping track of things I need to do and how often I do certain habits or tasks. But, my main problem is: it's not offline accessible. I can't tick off some tasks and this is a big issue I have, especially if we're going to go on vacation or just traveling to far places, and especially if the signal over where we go is very poor. Our Internet connection is also terrible as it someti…	4	15		2022-04-19 16:27:39	Thank you for your review! We plan to add offline mode in the future. In the meantime, if you’d like to let us know what features you’d use the most offline, you can do so via Menu - About - Support - Send Feedback.	2022-04-24 20:32:03
192	c4c626ed-c44c-47eb-aaff-250f3152915d	Nitsan Simantov	https://play-lh.googleusercontent.com/a-/AFdZucprQgmUibae31efELlB-6Fx0V9O4KrK25hvqEx8jCc	I used it a lot but often switched to Loop Habit Tracker which has progress graphs and calendar (the Habitica stats are only available on desktop via a site called OldGods) but Habitica has "Dailies" which is a great to do list that refreshes every day and has a good widget. But I just ignore the game now. I think the 8-bit art style is just too small to enjoy. Everything is made of just a few pi…	4	6	3.5.1.3	2022-04-19 11:11:31	We don't automatically delete accounts. It sounds like you might be having trouble logging in. You can contact us at admin@habitica.com and someone on staff will be able to help you gain access to your account. If you’d like to share your feedback about art or graphs with us directly, you can do that via Menu - About - Support - Send Feedback.	2022-04-18 22:08:15
193	8f2531e7-ee8c-40b5-b1e6-40589b0abdc4	Isaac Erice	https://play-lh.googleusercontent.com/a/AItbvmnBaF3gEVGDAO4lVDaTvBo3nWfSKv3-kzmagqUM=mo	too complicated, it gets in the way of actually doing the tasks.	2	0		2022-04-19 08:54:43	Hi, Issac! Sorry to hear you’re finding Habitica to be complicated! You may find the resources at Menu - About - Help and FAQ helpful.	2022-04-24 20:33:20
194	b5963d2f-c7cb-4d6a-be2d-aef595f503fb	Branita Sekaran	https://play-lh.googleusercontent.com/a-/AFdZucqvbrzGgoMKLzjKxxAursU1lpNE8tN57dIaAeOEkA	Definitely download! Habitica makes tasks and everyday chores more manageable and increased my motivation, especially studying during lockdown. It's great whether you play games or not. It allows the player to complete the tasks and gain experience for it. The drops and rewards are plentiful even if you don't want to pay. It's more fun to play with friends and this app deserves alot more recognit…	5	18	3.5.1.3	2022-04-18 23:47:45	Thanks for your detailed review including what features you love. We're happy to hear Habitica has been so motivating and fun for you! If you’d like to share any feedback with us directly, you can do that via Menu - About - Support - Send Feedback.	2022-04-24 20:34:46
195	02e158f0-397d-4507-8881-2a0161ff6d03	mridul jain	https://play-lh.googleusercontent.com/a-/AFdZucoYZ_Aw2qL1LlaDhaS9JSdjfIgbZ_DgjhIHApYedg	Its amazing to build a game profile on your real life tasks/habits/goals , just the thing iam looking for, and iam gonna stay here for long , thankyou devs for creating this gem.	5	0	3.5.1.3	2022-04-18 18:36:59	Thanks so much for your review. We're happy to hear Habitica has been helpful for you and hope you stay for many great adventures! If you’d like to share any feedback with us directly, you can do that via Menu - About - Support - Send Feedback.	2022-04-24 20:35:24
196	e4da7883-3b95-41bb-9dc1-23742af21180	Paul K.	https://play-lh.googleusercontent.com/a-/AFdZucqoZ3gGua5YMfWA7AvorF1cMtBjInNvEJXujW_V	Could you please make widgets for each stat, I.e. intelligence/constitution so it can be used as a header file displaying single stat and start bar. Function would be to label thematic stat tracking per page to house specific apps. Thanks!	5	0	3.5.1.3	2022-04-17 06:23:46	Hi, Paul! Thanks for your review. If you have comments on the widgets or any you'd like to see in future updates, please feel free to reach out via Menu - About - Support - Send Feedback.	2022-04-18 22:09:56
197	cd33f159-96ca-4cb5-8e2a-7395a42374e5	Billy Blevins	https://play-lh.googleusercontent.com/a-/AFdZucoRAlEDTCf83lPasuQQXBvItbHYtvBitZwTjYnBVg	There is literally only one reason for me giving this app a 5 star review despite getting so recently that i haven used enough of it. When customizing your character there is a wheelchair option. I dont need a wheelchair but the fact that some people are understanding that disability representation matters does my heart so well and makes me so happy	5	0	3.5.1.3	2022-04-17 04:27:03	Thanks for your review and kind words; they mean a lot to us! We will continue to create avatar customization options that make everyone feel valued in our community. If you’d like to share any feedback with us directly in the future, you can do that via Menu - About - Support - Send Feedback.	2022-04-18 22:12:35
198	e857f49e-f0f8-44e9-97c2-66202589cc99	Michelle Enderink	https://play-lh.googleusercontent.com/a-/AFdZucoD6XZ2dSkcI11pVsC3vHelgLaYYc6SBeCteD2YXg	In the setting you can choose the audio theme but there 's not even a single sound in the app. But this app is amazing. It's like i'm playing Neopets but for serious things. I really love the concept and I love to talk to people in the chat. They really helping me trough my hard time. I never expected that this will generally make me happy.	4	0	3.5.1.3	2022-04-16 02:20:11	Hi, Michelle! Thanks for using Habitica. There's a support ticket open right now for fixing notification sounds, so we're hoping to have that fixed as soon as possible. You can check the website version to sample the different sounds in the meantime.	2022-04-16 23:33:21
199	470f9c70-1eec-48c5-8c76-8f0291cffcd6	Keen Meme	https://play-lh.googleusercontent.com/a-/AFdZucq7snPafDFmvBw_-lZAjYetdnPT0Ky8lkMF6W8zaA	Add a setting in general or something that enables the user to set what task view they want in default either they want all task to view, due to day or Completed. Cause everytime I open the app it always set to all which is annoying cause i also see greyed daily task. I just want a permanent view everytime I open the app. And also add calendar it is what the app lacking the most.	3	0	3.5.1.3	2022-04-14 16:14:12	Thank you for your review! Calendar view is a highly-requested feature, and we hope to add it soon. In the meantime, you may find this user-made calendar tool helpful: https://habitica.fandom.com/wiki/Strategitica	2022-03-11 16:24:51
200	ab0d42c1-0b9a-441e-b775-9c19a81fbe19	BigJav WJ	https://play-lh.googleusercontent.com/a-/AFdZucqAAXTXjoJACTrlYBjB7oXlq288WqOl_KUDyDIP	The habit counter is always resetting itself, so annoying as practically I am the one who's keeping track of my habits... What do I need the app for if it can't even keep track of my habits? Also, the reminders are broken... Sometimes the app just won't send any notification to my phone, also very annoying.	2	2	3.5.1.3	2022-04-14 01:53:38	Thanks for using Habitica. There's a support ticket open right now for fixing notifications, so we're hoping to have that fixed as soon as possible. Please let us know if you're still having trouble via Menu - About - Support - Report a Bug. A direct report will provide details that will help the team fix the issue.	2022-04-09 15:52:32
201	fe1b2a1f-cd85-4bda-80b8-2cd2f3994422	Hadrien Carroz Gribot	https://play-lh.googleusercontent.com/a/AItbvmnb9OKUPimoHO7_pk6JM2nsnX862ugslJdoojv0=mo	Too convoluted	3	1		2022-04-13 20:16:33	Thanks for giving us a try. Sorry to hear you're not enjoying all the different features in Habitica! You may find the resources at Menu - About - Help and FAQ helpful.	2022-04-16 23:44:45
202	4cb62005-2eb5-4007-a83f-2c641cf921f9	Kameryn R.	https://play-lh.googleusercontent.com/a-/AFdZucq2yzjZNrRkwCaluhR5yYD9Q6q_KydFlwMDa88jug	The one task list I've been able to use the longest and most consistently.	5	0	3.5.1.3	2022-04-13 19:41:50	Hi, Kameryn! Thanks so much for your review. We're happy to hear Habitica continues to be helpful for you! If you’d like to share any feedback with us directly in the future, you can do that via Menu - About - Support - Send Feedback.	2022-04-16 23:45:39
203	8162b716-d1ac-4f01-80df-9bb3afe9b062	Chase Wilkins	https://play-lh.googleusercontent.com/a-/AFdZucp7cQW8KIrzKoLeVYpSok1nIOP50jkBsqaysDzMNg	I like this app alot. Helps me organize with tasks but one issue, that's probably on samsungs end is the widgets. The daily task doesn't show but the others do. So yeah weird..	4	0	3.5.1.3	2022-04-12 05:33:03	Hi, Chase! Thanks so much for your review. We're happy to hear Habitica has been helpful for you! If you have comments on those widgets or any you'd like to see in future updates, please feel free to reach out via Menu - About - Support - Send Feedback.	2022-04-16 23:46:24
204	a2559924-51ca-4b57-b519-24529a3d1d95	Mina	https://play-lh.googleusercontent.com/a-/AFdZuco4_oA9jsnmPOg55tIOMTI7z4GKKo6g0Nj0CVLT	I'm on british english and both the B.E and A.E are the same please can you change the spelling? I mean what's the point in having a separate one when they're the same?	4	0	3.5.1.3	2022-04-10 05:50:51	Thanks so much for your review. If you’d like to share any feedback with our devs directly about language, you can do that via Menu - About - Support - Send Feedback. Not all translations are complete, as our translations are done by volunteers. If you'd like to help, you can learn more here: https://habitica.fandom.com/wiki/Guidance_for_Linguists	2022-04-16 23:51:19
205	d32a1cf6-eb88-492c-850f-fcbe613a0b37	Abyss Wanderer	https://play-lh.googleusercontent.com/a-/AFdZucrz8I25dOz0nc7vXRCPa9KzD2tDC3IHDSP3w0iHhg	I love it. Easy to use, and fun to use as well.	5	0	3.5.1.3	2022-04-09 18:27:03	Thanks so much for your review. We're happy to hear Habitica has been helpful and fun for you! If you’d like to share any feedback with us directly, you can do that via Menu - About - Support - Send Feedback. Happy adventuring/wandering!	2022-04-16 23:52:48
206	6533a826-a72d-4415-9faf-741f13a997e3	Mia Mello	https://play-lh.googleusercontent.com/a-/AFdZucoxF3rdzjprtRUHcbvt3qXzh81SJPqgeXy0zQvVsQ	I love this app it is the best, it really helped me do all my task and habits 💗. 💐 I am really thankful for the creator of this app.	5	0	3.5.1.3	2022-04-09 18:08:46	Hi, Mia! Thanks so much for your review. We're thankful to hear Habitica has been helpful for you! If you’d like to share any feedback with us directly in the future, you can do that via Menu - About - Support - Send Feedback. Happy adventuring!	2022-04-09 16:06:25
207	fa01527c-43b9-425e-a2ce-8a6e8f9027de	G T	https://play-lh.googleusercontent.com/a/AItbvmkwKjEAXNg4ogNfrBL2djlT1TZCOPXjjWNiuXtw=mo	Much simpler and quicker to use than DoItNow or LifeRPG, with most of the benefits. I'm not so much a fan of the online-related stuff, mostly feels like monetisation to me, but it's not too pushy. Good todo app with good RPG aspect.	5	2	3.1.1	2022-04-09 03:29:04	Thanks so much for your review. We're happy to hear Habitica has been helpful for you! If you’d like to share any feedback with us directly, you can do that via Menu - About - Support - Send Feedback.	2022-04-09 16:04:34
208	b4409b4e-e46b-443b-9275-8fd263943b54	Najee Benton	https://play-lh.googleusercontent.com/a-/AFdZucpW0puOvgKKrIw0vNnuzb-S1WsSp2iJoOdveb0-9Q	This app Change my life situations dramatically! I actually we t from having no time management skills to getting everything done!	5	0	3.5.1.3	2022-04-07 03:47:08	Hi, Najee! Thanks so much for your review. We're happy to hear Habitica has been helpful for you in being productive and developing good time management skills! Way to go! If you’d like to share any feedback with us in the future, you can do that via Menu - About - Support - Send Feedback.	2022-04-09 16:07:36
209	39543cb6-423f-4494-9480-291dbf4fa152	Bruna Diniz	https://play-lh.googleusercontent.com/a-/AFdZucp0DA4GkKPiQSGgSbbamcROrBf338q1EihQ9KQLJkk	É mais divertido ainda quando se cria um grupo com amigos, motiva o dobro fazer as tarefas para coletar as recompensas das missões	5	0	3.5.1.3	2022-04-06 17:26:07	Thanks so much for your review. We're happy to hear Habitica has been helpful for you and your friends! If you’d like to share any feedback with us directly, you can do that via Menu - About - Support - Send Feedback. Happy adventuring!	2022-04-16 23:55:03
210	4f5d7d22-0218-472c-8396-e592ab0772ae	Maki	https://play-lh.googleusercontent.com/a-/AFdZucrP8gQcFQ1SyV8MBf9oxkQhvfoNzQ-XPKCWXj-oaw	Having to make an account to use this thing is too much of a hurdle. There are (probably better) apps which store data locally without issue. Not for me.	1	0	3.5.1.3	2022-04-06 16:52:42	Thanks for considering Habitica. Our users have accounts so that their tasks can be accessed from multiple devices and multiple platforms. Sorry that it didn't meet your needs at this time.	2022-04-09 15:51:14
211	373797fe-869b-4503-bd15-501e773f7483	eradication	https://play-lh.googleusercontent.com/a-/AFdZucqYfoH8zuo8qQjznCoXyhjSO2tOhqGseUSFJfrn9Q	Really awesome for gamers who struggle with motivation.	5	0	3.5.1.3	2022-04-06 13:13:20	Thanks so much for your review and rating. We're happy to hear Habitica has been fun and motivating for you! If you’d like to share any feedback with us directly, you can do that via Menu - About - Support - Send Feedback.	2022-04-09 15:53:07
212	0fa028b2-20d5-4d0a-a345-9f7f8821cbb1	dumpsterfirebread ip	https://play-lh.googleusercontent.com/a-/AFdZucrtaeJwr9nqzf8-2_68wrG20IhCctCJRCGZMBgZ	This is good when you are able to self motivate to use it but not enough for you to do it all your self	5	0	3.5.1.3	2022-04-05 20:03:37	Thanks so much for your review. We're happy to hear Habitica has been motivating for you! If you’d like to share any feedback with us directly, you can do that via Menu - About - Support - Send Feedback.	2022-04-09 15:55:55
213	0ff5158e-0c9f-4932-801f-bccb08d42d7c	Ellie Monty	https://play-lh.googleusercontent.com/a-/AFdZucq6h67f1EdpGIE0yZESNcwi1nZpq2sc2IbiVeze	This genuinely makes me better at getting things done, motivating me to do things that are good for myself. I only wish there was the option to sell pets and mounts!	4	1	3.5.1.3	2022-04-05 02:54:20	Hi, Ellie! Thanks so much for your review. We're happy to hear Habitica helps you be more productive and focus on good habits! If you’d like to share any feedback with us directly, you can do that via Menu - About - Support - Send Feedback.	2022-04-09 15:59:25
214	d4808c67-6261-4560-8884-d395a2450bd0	Prince Nipal	https://play-lh.googleusercontent.com/a-/AFdZuco2V0vinQTI9cYVnltAik4X4SAxvvkJc8XTjlZg	This app changed my month! Hopefully, will changed my year! I subbed for year 🔥 I tried using habitica seriously. Searched for youtube vids for guides and inspiration. I've been so productive. I became mindfull of my actions. The experience will difer from how you play/use this app. Tip: start with small things. Make a mini version of a goal you want to do. Eg. Instead of "jogging for 30mins" you…	5	0	3.5.1.3	2022-04-05 01:29:17	Thanks so much for your review and tips for users to start small. We're happy to hear Habitica has been helpful for you! If you’d like to share any feedback with us directly, you can do that via Menu - About - Support - Send Feedback.	2022-04-09 16:00:18
215	ea701a34-d537-4b0b-8971-4acf4e87351e	Stephen Rothwell	https://play-lh.googleusercontent.com/a-/AFdZucps5GvJfdasqFUp8QDggJEA27r3Hb5FWllk4OWdhQ	Good app all round. A few minor issues the notifications and alarms are silent even when my phone is on loud and volume max. The to do tasks could be helpful if they are due that they are put on daily tab. Some organisation with habits daily and to does. Other than that great app really useful good that you can many task, habits and dailies. The adventure with your little character looks promisin…	4	2	3.5.1.3	2022-04-04 13:10:51	Hi, Stephen! Thanks so much for your review. We're happy to hear Habitica has been helpful for you! There's a support ticket open right now for fixing notification sounds, so we're hoping to have that fixed as soon as possible.	2022-04-09 16:01:01
216	60d3beb8-dc7e-4f66-8517-6fca6b4351ab	arun naruka	https://play-lh.googleusercontent.com/a-/AFdZucqJDfHwwxZsnv1EqEF_y2cX_bWRq9I-a3m2jALv3w	Brilliant design	5	1	3.5.1.3	2022-04-04 10:07:37	Thank you for your review. We're happy to hear you enjoy Habitica's design! If you’d like to share any feedback with us directly, you can do that via Menu - About - Support - Send Feedback.	2022-04-09 15:48:02
217	d29be116-cb42-42c9-be14-4b88861d45a5	KostaS Dmoira	https://play-lh.googleusercontent.com/a-/AFdZucq-vWJb65BCUaqE9vn2U2sp3xHK_rXucW8J2wN_jA	Best app to keep track of whatever you want in the world. Equip yourself with honesty and transform your life into a MMORPG	5	1	3.5.1.3	2022-04-03 15:04:43	Thanks so much for your review and recommendation. We're happy to hear Habitica has been helpful and that the gamification has been fun for you! If you’d like to share any feedback with us directly, you can do that via Menu - About - Support - Send Feedback.	2022-04-04 00:52:27
218	7b42c1d4-e678-4307-a59e-d739126ef109	Skandar Reefer	https://play-lh.googleusercontent.com/a-/AFdZucq135fBBXMkLJ6sjU6XhA0Siy0XOL5k3lfRXPwx5Q	I enjoy this app it's super neat. However I want my lists organized so I can do the tasks one by one in the order I want. But the lists keep moving my tasks all over the place, when I try to move one up or down I have no idea where it will land. That's a touch frustrating.	3	5	3.5.1.3	2022-04-02 17:25:00	Hi! Thanks for using Habitica, but sorry to hear about this issue with tasks reordering. Please let us know if you're still having trouble via Menu - About - Support- Report a Bug and the team will be able to look into it.	2022-04-04 00:53:28
219	9005fb12-2d7d-46cc-83cc-3c099cf56641	Pamela Nguyen	https://play-lh.googleusercontent.com/a-/AFdZucrcBtf04JKLRdc3Mx5ARtHOJHmUi3AeDmbAIZ9ErA	My friends and I have a habit of procrastinating and playing video games. So Habitica is perfect, since we're playing a video game, leveling up, and keeping each other accountable. Thank you Habitica team! :3	5	1	3.5.1.3	2022-04-01 06:34:48	Hi, Pamela! Thanks so much for your review. We're happy to hear Habitica has been helpful for you and your gaming friends! If you’d like to share any feedback with us directly, you can do that via Menu - About - Support - Send Feedback. Happy adventuring with accountability!	2022-04-04 00:55:01
220	5baa9a4b-bb04-4750-9031-3510b62f1a5a	Anthony Aurigema	https://play-lh.googleusercontent.com/a/AItbvmk6t8LAD9vAPV4qKJumd5yOcRPIgilP3ip8G1io=mo	I really like this app, I would like to be able to set tasks on a timer, resetting the time once completed. Example I don't need to mow every Monday, but I need to mow every 10 days.	4	0	3.5.1.3	2022-03-30 16:49:59	Hi, Anthony! You can set a daily task to repeat every 10 days, for example, to meet the need you describe here. Hope that helps, and thanks for using Habitica!	2022-04-04 00:58:44
221	4869dcaa-6c7f-4452-b783-3ca576783212	Luke Krawiec	https://play-lh.googleusercontent.com/a/AItbvmkAWXs2LcATgmgzNrWlFCumlqLhWmMRKtL8BYn4=mo	Juvenile	1	0	3.5.1.3	2022-03-29 16:05:33	Hi, Luke! Thanks for trying Habitica. Sorry it's not your cup of tea!	2022-04-04 00:59:32
222	12741ccd-45e4-495b-a322-97a4c101305f	kano	https://play-lh.googleusercontent.com/a-/AFdZucoosuQKtx9jyae9bWIcjk3yur8rTMAocyHlqegg	BEST!	5	0	3.5.1.3	2022-03-29 15:52:11	Thanks so much for your review. We're happy to hear you're finding Habitica to be the best! If you’d like to share any feedback with us directly, you can do that via Menu - About - Support - Send Feedback.	2022-04-04 01:00:02
223	e23958ef-336f-47df-a695-cd554bb60c1b	Aurelas Rainsong	https://play-lh.googleusercontent.com/a-/AFdZuco-xwubXEVrF7oBkm0UI2FyOBjL447e-o4qpyeHNWE	This app has a lit of promise, but for me it isnt quite there yet. I need a function for days when Im out of town and the usual chores do not apply. Options like "every other day" woukd be helpful too. I didnt really feel any incentive to level up a tiny pixelated character I could barely see. I also felt like this apo led to me spending too much time on my phone, which is counterproductive. Mayb…	3	0		2022-03-29 13:05:55	Hi, Aurelas! You can set dailies to repeat at custom time intervals, such as every 2 days. You can also check into the tavern to pause your progress so you don't incur any stat penalties on days when you're out of town. Sorry Habitica didn't meet your needs at this time, but we're glad you tried it out and appreciate your feedback.	2022-04-04 01:02:41
224	636db311-8e14-4efe-8701-6ae3e1dbcef4	Summer B	https://play-lh.googleusercontent.com/a-/AFdZucrF-4iUi_8Jtx1_ktQX_x5zc6nFEOAi-00nCQRT_g	Habitica is great for me to get that little extra dopamine rush when I complete a task. I wish that the to do section maybe had with a visual separation between the days that tasks are due? This would help a lot. Thanks Habitica!	4	0	3.5.1.3	2022-03-29 04:24:48	Thanks for your review and feedback! We're glad to hear that Habitica has been great for you! We now have an official suggestion and comment form to help us keep track of what features users want the most. You can find it via Menu - About - Send Feedback if you’d like to add your ideas.	2022-04-04 01:04:00
225	7a0767ff-11ac-43e8-a61c-213e9e88e9a6	Dice-y studio	https://play-lh.googleusercontent.com/a-/AFdZucqSArezdESUCPearAb-P-oy5q9b89nWdKeriIQrhw	So I don't know how to start this off so I'm just gonna get on with it. This app is amazing! I've had this app before and I can tell you that out of all the other task list apps out there, this by far my favorite. It's fun, it's helpful, it's updated quite often, its got the social aspect. And tons of other helpful resources. Disclaimers: This review and my opinion of the app is not a result of B…	5	0	3.5.1.3	2022-03-28 15:20:23	Thanks so much for your detailed review and rating. We're happy to hear how much you're enjoying Habitica! If you’d like to share any feedback with us directly, you can do that via Menu - About - Support - Send Feedback.	2022-04-04 01:04:50
226	b9d4cad0-a1e7-44f8-819c-ed3f2ef0e28a	Rosalie Fralick	https://play-lh.googleusercontent.com/a-/AFdZucoVLgJGFJ6FF69eI_THAC0FBwoZt5Ve7Yi8969C	I'm not in the habit of leaving reviews but as a neurodivergent person I wanted to leave this for others to see. This app is organized in a way that gameifies taking care of myself, mor home, and my family. It doesn't shame you if you forget to log in or don't finish your tasks. It's just very helpful to me and wanted others to have that info.	5	1	3.5.1.3	2022-03-27 04:08:27	Hi, Rosalie! Thanks for your review and kind words. They mean a lot to us! We're glad to hear that Habitica is helpful for you. If you'd like to share any further feedback, please feel free to reach out via Menu - About - Support - Send Feedback. Happy adventuring!	2022-04-04 01:08:57
227	77e1859d-343a-49a3-afb5-4762d8348030	Peace, Cats and Unity	https://play-lh.googleusercontent.com/a/AItbvmkAviBbkNoZU2R0q2CpjYeadu0SZtq85rLGELsn=mo	Thank you for creating this app! Please add a Pomodoro timer+ tracker as well.	5	0	3.5.1.3	2022-03-25 12:10:45	Thanks for your review and feedback! We now have an official suggestion and comment form to help us keep track of what features users want the most. You can find it via Menu - About - Send Feedback if you’d like to add your ideas.	2022-03-26 16:51:36
228	e70d00ce-048a-4c98-b02a-d44b8fff2e40	shahab sh	https://play-lh.googleusercontent.com/a-/AFdZuco7AOBoPF64sgGDTo1ZN2C_3G3i2iiUkC2yFkIEyQ	Not able to register	1	0		2022-03-23 22:19:57	Sorry to hear you're having trouble registering. Facebook login is disabled, if that's the option you were trying to use. If you continue to have trouble, feel free to email admin@habitica.com, and we'll try to help.	2022-03-26 16:59:45
229	32c2e3e7-3b00-432f-b5f2-aeef423db346	Lahav Pines	https://play-lh.googleusercontent.com/a/AItbvmk2s8vIy88OnbZflsTo9LmvvQAJU5lRsgAr1ZzW=mo	Best to do list out there, especially for ADHD people. Though the websit view is better, i recommend organising through the web.	5	0	3.5.1.3	2022-03-23 09:02:29	Thanks so much for your review. We're happy to hear Habitica has been helpful for you! If you’d like to share any feedback with us directly about either version, you can do that via Menu - About - Support - Send Feedback.	2022-03-26 17:00:21
230	6aed649e-4146-4298-9a5a-b8f8f12e0916	Mert İndibi	https://play-lh.googleusercontent.com/a-/AFdZucoLhHco-jFUYH_72pE9I-X2gezAEAHxun4ltQ_teA	I really like the app and I've gotten used to it. I think there is a very large room to grow for this app. It has a good desktop support since it can be opened on a desktop browser but a smartwatch app with Wear OS/Huawei store support would be amazing. It would also be amazing if it could sync with google clock and calender. It would be really nice to be able to export my to-do list and dailies …	4	75	3.5.1.3	2022-03-22 15:49:55	Thanks so much for your review. It means a lot to us! We now have an official suggestion and comment form to help us keep track of what features users want the most. You can find it via Menu - About - Send Feedback if you’d like to add your ideas.	2022-03-26 17:01:53
231	c744c0d3-fddf-414e-857d-6aa8d97a0be1	Georgie C	https://play-lh.googleusercontent.com/a-/AFdZucqcGqMGR76H2fwRjS6At2v-WyLyKvqpsYDrT2GuazA	the player character is ugly. there should be more free customization of the face and hair. the mechanism of rearranging tasks, habits, etc. doesn't work half of the time.	4	1	3.5.1.3	2022-03-22 04:50:03	Hi, Georgie! Thanks for your review! We'll keep your feedback in mind as we continue to work to improve Habitica. Please let us know if you're still having trouble with reordering tasks via Menu - About - Support - Report a Bug. A direct report will provide details that will help the team fix the issue.	2022-03-26 17:03:04
232	e8e29dd1-700f-43c4-b842-9d2ab4662503	Apoorv Som.	https://play-lh.googleusercontent.com/a-/AFdZucpIlFrcS6lB5ERijylnIRVz0DiYxIVU62nbw5B_zrc	Best!	5	0	3.5.1.3	2022-03-22 00:38:33	Thanks so much for your rating. We're happy to hear you like using Habitica! If you’d like to share any feedback with us directly, you can do that via Menu - About - Support - Send Feedback.	2022-03-26 17:05:09
233	2720d868-e9a5-4432-a672-f73583c5258d	Danny Pan	https://play-lh.googleusercontent.com/a/AItbvmnVxfzsPo-TjW7Aa6e59oqjfKQ-Q3_fAHnRmfTH=mo	Quite glitchy, and the sounds are tied to notifications instead of media volume.	3	1		2022-03-21 23:02:04	Thanks for your review! You can help us fix glitches you encounter by reporting them directly via Menu - About - Support - Report a Bug.	2022-03-26 17:06:04
234	2d5fc32a-77ce-42f7-9f02-2730ea6af435	Artak Torosyan	https://play-lh.googleusercontent.com/a-/AFdZuco9gOon2L2cCHlFh3s9GJ6O7_VZSDBo1rUjkitVXw	reminders are awfully unreliable	4	0	3.5.1.3	2022-03-21 13:59:45	Thanks for using Habitica! We are working on improving reminders. You can help us fix bugs by reporting them directly via Menu - About - Support - Report a Bug.	2022-03-26 17:07:02
235	3e688254-24aa-4872-a282-a4ed4dafb8db	Ari Savage	https://play-lh.googleusercontent.com/a-/AFdZucr22_1ceeutxvDL1E6D9nJ95sSr6aS2NItF-j9u	Wonderful app! It has helped me get on track with my personal goals. In such a fun way too! Suggestion from a really hooked new fan of this app... My work has me scheduled two different shifts throughout the week (morning or night), it would be cool if we could save the lists under categories so we can switch our goals easier as the days go. Since I switch shifts so often, it makes it harder to s…	5	55	3.5.1.3	2022-03-21 13:01:09	Hi, Ari! Thanks for your review and feedback! We're glad to hear that Habitica has been helpful for you. We now have an official suggestion and comment form to help us keep track of what features users want the most. You can find it via Menu - About - Send Feedback if you’d like to add your ideas.	2022-03-26 17:12:42
236	fc7d11b0-e5b0-4ead-a749-610a8d656c37	Abwin	https://play-lh.googleusercontent.com/a/AItbvmkAVbz1kOT7kW44OifgMmSrmW-KQ898pjmDYdzsgw=mo	This app is useful with a good idea, the bad thing is that internet connection is required and ticking the checkmarks isn't possible in offline mode even as a temporary option to save our progress in jobs and habits when we are not connected to internet	3	1	3.5.1.3	2022-03-20 15:15:12	Hi, Abwin! Thank you for your review! We plan to add offline mode in the future. In the meantime, if you’d like to let us know what features you’d use the most offline, you can do so via Menu - About - Support - Send Feedback.	2022-03-26 17:14:19
237	8474a214-cd9a-4f51-adca-4e221a739a06	Angelena Kashatok	https://play-lh.googleusercontent.com/a/AItbvmmJfWbBHPdTjSXveMhf9dHoRaR3QsHY40RZJyd1=mo	This is my first time writing a review in general. I love the concept of this app. I like that this app is free and doesn't ask me to go premium just get what I really need/want in a habit helping app. I like that I add a habit and it includes notes, so I remember why I added that habit and the main goal/purpose. However I would like to see an upgrade to separate the habits. For example morning, …	5	12	3.5.1.3	2022-03-20 11:09:47	We're honored that you took the time to write your first review for us! We're committed to keeping Habitica free and add-free as well as fun and useful. We now have an official suggestion and comment form to help us keep track of what features users want the most. You can find it via Menu - About - Send Feedback if you’d like to add your ideas.	2022-03-26 17:17:04
238	39110446-8689-444a-aa44-614d1cc90244	Whiskers Kibou	https://play-lh.googleusercontent.com/a-/AFdZucqIMHtay8-fNQFaJHSKOo7aT8BBMZlHOaQgELLHhA	This app really helps you incentivize doing all the things you want to do with your life but struggle to find the will to do.	5	0	3.5.1.3	2022-03-19 06:00:39	Thanks so much for your review. We're happy to hear Habitica has been helpful and motivating for you! If you’d like to share any feedback with us directly, you can do that via Menu - About - Support - Send Feedback.	2022-03-18 19:10:55
239	69229b05-3a35-40c8-b326-21fb219540c9	Preston Taylor	https://play-lh.googleusercontent.com/a/AItbvmmlC-ZTQ-Id4fR7w3sDYKiTDVs7D3d_egvC5ATr=mo	Nice.	5	0	3.5.1.3	2022-03-19 03:14:38	Hi, Preston! Thanks so much for your rating. We're glad to hear you're finding Habitica to be a nice experience. If you’d like to share any feedback with us directly, you can do that via Menu - About - Support - Send Feedback.	2022-03-26 17:19:01
240	967d26bd-5ec3-4238-aa5a-acd3a13dd574	LumiNeveren	https://play-lh.googleusercontent.com/a-/AFdZucr3GE3U2SnctDUHhvLBrFjogRwtB_UJb-dJj4BcaQ	This app is wonderful since it allows me to keep track of my activities without any hassle. Although I do have a small suggestion, and that is being able to attach images. <333	5	1	3.5.1.3	2022-03-18 01:48:14	Thanks so much for your review. We're happy to hear Habitica has been helpful for you in keeping track of your activities! We now have an official suggestion and comment form to help us keep track of what features users want the most. You can find it via Menu - About - Send Feedback if you’d like to add your ideas.	2022-03-18 19:12:13
241	46f42cd5-eb49-4867-adae-beb3f9e1a3ca	Joanne Balmonte	https://play-lh.googleusercontent.com/a-/AFdZucqaaepY4QzWTniAaJHp_9R0_TgkSjjz-ViD58-W	I can't even sign in. Loading forever.	1	0	3.5.1.3	2022-03-17 18:57:19	Hi, Joanne! Sorry to hear you are having trouble logging in. We've disabled Facebook login, if that's what you're trying to use. If you continue to have trouble, please contact us at mobile@habitica.com so our team can help you regain access to your account and sign in on the app.	2022-03-18 19:13:25
242	fe351bca-7579-4384-af70-0880c4c3bf25	Tipor	https://play-lh.googleusercontent.com/a-/AFdZucroHY8YwJ1XTqeA7dCFL0JZQmE-G78GhGJho35pIQ	Changed my life, if you be honest, it will change your's too	5	0	3.5.1.3	2022-03-17 11:28:25	Thanks so much for your review. We're happy to hear Habitica has been life-changing for you! If you’d like to share any feedback with us directly in the future, you can do that via Menu - About - Support - Send Feedback.	2022-03-18 19:15:00
243	a20216f2-3925-49e1-bc87-38e569513298	Len	https://play-lh.googleusercontent.com/a-/AFdZucrMyIvlrF9yvDFS0s3pmHA9bANP1GB5sYciFQLx6w	Turns your tasks into an rpg, if what your life is missing is a bit of extra reward for completing tasks I can definitely recommend this app.	5	1		2022-03-17 11:17:06	Thanks so much for your review. We're happy to hear Habitica and its gamification have been helpful for you! If you’d like to share any feedback with us directly, you can do that via Menu - About - Support - Send Feedback. Happy adventuring!	2022-03-18 19:15:25
244	6b66d566-9f7b-4da9-8bd9-04213036ffac	himari Chan	https://play-lh.googleusercontent.com/a/AItbvmmtoVKFJbuGLRdtMV9xLr7kl7rDKFEXOdRb9kT8=mo	Thank you so much because of this app I'm more motivated to excel in school and do my school works on time! And I also do a lot of house chores now compared before.	5	2	3.5.1.3	2022-03-17 05:13:58	Thanks so much for your review. We're happy to hear Habitica has been motivating for you both for school work and for chores! If you’d like to share any feedback with us directly, you can do that via Menu - About - Support - Send Feedback.	2022-03-18 19:19:36
245	8e1c1b59-98d3-4e6a-b0ea-7014f0c1b471	Sandra Marcial	https://play-lh.googleusercontent.com/a-/AFdZucoIrFTQqNtO3bWA3waSsDImcEkYhX_JaJQNAdXQOg	I really love this app! I found it while looking for something to help me with my New Year's resolutions, and I've been addicted ever since. The idea of gamifying life is absolutely brilliant, and it works! It makes even getting chores done so much more fun, especially when you're questing with new-found friends, to fight bad habits-bosses and maybe win a special pet or mount! I decided to subscr…	5	5	3.5.1.3	2022-03-16 22:19:34	Hi, Sandra! Thanks so much for your detailed review and for supporting Habitica as a subscriber. We're happy to hear Habitica has been helpful and fun for you especially with your chores and New Year's resolutions! If you’d like to share any feedback with us directly, you can do that via Menu - About - Support - Send Feedback.	2022-03-18 19:17:57
246	18917ccb-925a-4019-bff8-a35850f65861	Mithila Kavsika	https://play-lh.googleusercontent.com/a-/AFdZucoByJSM1x7bef5CiGl9GhOyidM33QivOMYny41Jc3Q	I usually don't write reviews.... So if I write one that means I love that app..... This is the BEST APP EVER! Period. Nice work HabitRPG, inc. Keep it up!	5	0	1.4.3	2022-03-16 04:59:34	Hi, Mithila! Thanks so much for your review. It means a lot to us! We're happy to hear how much you love Habitica! If you’d like to share any feedback with us directly, you can do that via Menu - About - Support - Send Feedback.	2022-03-18 19:18:38
247	f2c0671b-6d02-4b78-b094-72c382f4a7eb	Abdalkarim Satli	https://play-lh.googleusercontent.com/a-/AFdZucrUXHLqZ4YtNR_b9KeGqQEW1owxXTYyzV86UFAB	This app helped me to organise my life alot ( I gave it 5 stars before) But it doesnt work in my region so im forced to use VPN to access my habits First it was all right for me but in later time it started to be annoying And the notifcations and reminders dont show up! 🙄	1	2	3.5.1.3	2022-03-16 01:50:01	Hi, Abdalkarim! Sorry to hear you're not able to access Habitica in your region. We hope one day you'll be able to rejoin the Habitica community.	2022-03-18 19:22:02
248	22178bc9-195d-47f7-b6c2-cf0b16c99f22	Jaden Mills	https://play-lh.googleusercontent.com/a-/AFdZucoooP9sI2Dk2KNUmjap_CR-CP0J6hsmWhKEgocE	Although there are still small bugs, it makes finding a schedule and completing mundane tasks fun.	5	1	3.5.1.3	2022-03-15 20:48:35	Hi, Jaden! Thanks for using Habitica and for your review! You can help us fix any bugs you might find by reporting them directly via Menu - About - Support - Report a Bug.	2022-03-18 19:22:49
249	7afe8a61-7f7f-4a91-bf15-9ba443462d74	Tara Saltou	https://play-lh.googleusercontent.com/a-/AFdZucrKEFjCOCN8HeMS5rkD6B7rqkS3LWpNm2Z_eCKL	Very good concept easy to use	5	0	3.5.1.3	2022-03-15 07:02:36	Hi, Tara! Thanks so much for your review. We're happy to hear you have found that Habitica has been easy to use! If you’d like to share any feedback with us directly in the future, you can do that via Menu - About - Support - Send Feedback.	2022-03-18 19:26:27
250	ec2d468b-cf46-40b9-9133-8b6350576137	Morrick	https://play-lh.googleusercontent.com/a-/AFdZucrojAJt1h0evqKpoFhVjmjoBl8UhtaTGfJ7ZQ1C	The daily reminder doesnt work unless you open it, which defeats the purpose. It straight up doesnt work without an internet connection. If its not consistent, its worthless.	2	2	3.5.1.3	2022-03-14 14:34:52	Hi, Morrick! Thank you for your review! We plan to add offline mode in the future. In the meantime, if you’d like to let us know what features you’d use the most offline, you can do so via Menu - About - Support - Send Feedback.	2022-03-18 19:29:22
251	07cac6e7-7f57-45ac-9cc1-e0b17a5f3515	Dustine Jake galang	https://play-lh.googleusercontent.com/a-/AFdZuco7oDqTHdrbxochEh0VQI3jHueuyYt7khjZ6smy	Loading is bad sometimes stock on the same thing after leaving a challengeeven if you leave and click the delete task too it won't go off	3	0	3.5.1.3	2022-03-13 12:52:57	Sorry to hear about this issue. Please let us know if you're still having trouble via Menu - About - Support - Report a Bug. A direct report will provide details that will help the team fix the issue.	2022-03-18 19:31:39
252	4137ce05-aa85-404f-94db-b8888e7d87dd	Rasendriya W S H	https://play-lh.googleusercontent.com/a-/AFdZucoPQjDEDMwU0_XxceGkP9DvKej0B9yGY6tZwSFiKA	Gamified rpg gamjng pog	5	0	3.5.1.3	2022-03-13 09:13:57	Thank you for your review. We're happy to hear you're enjoying the gamification aspects of Habitica! If you’d like to share any feedback with us directly, you can do that via Menu - About - Support - Send Feedback.	2022-03-18 19:32:45
253	b9c198f1-8b79-4382-a1a5-3704887c536a	Siren Skye	https://play-lh.googleusercontent.com/a-/AFdZucqnaK8C_P2GUQpauMWapX1nMGaRNe1gOMuBsgDq1qU	An amazing app that helps with habits and adds gaming to it for fun. First let me say there are no ads, which I love. This app has helped me so much in just being more organized and I have actually been making To-Do lists on this app everyday, which I use to never do. I love the gaming aspect to it and how you can dress your character and the amount of things you can do in the app. Such as, Chall…	5	7	3.5.1.3	2022-03-13 04:46:50	Thanks so much for your review. We're happy to hear Habitica has been helpful for you and we're committed to keeping Habitica free and fun! If you’d like to share any feedback with us directly, you can do that via Menu - About - Support - Send Feedback. Happy adventuring!	2022-03-18 19:34:21
254	f44b61ad-0d44-4b28-934a-e6b11c775c1e	zgft L	https://play-lh.googleusercontent.com/a-/AFdZucq816D1pAIXfCq3NfSfJuDvwZ3BQ8nKID1xy4L7	This is absolutely the perfect thing to track all your life goals, and you can write your thoughts down & explain or express to yourself on how to want to go about the future of your life. I always thought about my life as an RPG game, so this is like the interface menu or quest book, while you continue your adventure of real life. This is super motivational & I think I'll be using this for a lon…	5	6	3.5.1.3	2022-03-12 18:24:42	Thanks so much for your review. We're happy to hear Habitica fits your needs so well! If you’d like to share any feedback with us directly, you can do that via Menu - About - Support - Send Feedback. Happy adventuring through real life!	2022-03-18 19:35:02
255	07d64d75-71b0-4d5c-b918-b2427f9920e4	Cipo Bazan	https://play-lh.googleusercontent.com/a/AItbvmkQdntSVkjF2WNmR2WB9UpcsWYQdlX2--9IzHao=mo	Great in almost every way, but please for the love of God make an undo button for the to-do list. I've lost so many to-do lists and notes because I went to check the details of a task and accidentally checked off an incomplete task.	4	18	3.5.1.3	2022-03-12 15:40:21	Thanks so much for your review. We're happy to hear Habitica has been helpful for you! We have an undo! You can filter your To Do list to see completed tasks and then uncheck any task you may have accidentally marked as finished. Those tasks will instantly reappear on your regular To Do list. Hope this helps!	2022-03-18 19:36:52
256	2dbe5f00-317f-4f08-abf5-8b8e1afa06e2	Meenakshi Bhardwaj	https://play-lh.googleusercontent.com/a-/AFdZucpzXNyxJ5KKOqHsFkh8CkceGyNtXRHLEBLoAkwjWw	Just fell in love with the concept of the app..It's like they gamified the plain simple habits app.Makes it more easier to use!(the graphics of the character could be more improved too+there should an option once an activity in dailies/weekly gets completed it could vanish) it'll be less chaotic&more organized and reappear once again in dailies the next day	5	6	3.5.1.3	2022-03-11 11:59:14	Meenakshi, thanks for your review and feedback! We now have an official suggestion and comment form to help us keep track of what features users want the most. You can find it via Menu - About - Send Feedback if you’d like to add your ideas.	2022-03-11 16:23:20
257	48dcc392-8db7-4dbe-b14e-8413ceb925a5	G	https://play-lh.googleusercontent.com/a-/AFdZucrEkNxsdFfwoFgBTfFG0vEUs0HEUF73y6TeUv1UMA	Can't custom sort my dailys anymore, they just pop back to where they were after I drag one or they move to a random spot.	3	1	3.5.1.3	2022-03-10 16:05:01	Sorry to hear about this issue about sorting dailies. Please let us know if you're still having trouble via Menu - About - Support - Report a Bug. A direct report will provide details that will help the team fix the issue.	2022-03-11 16:26:58
258	c917d2f8-3039-4dac-a721-92f6c7e662cd	James Adair	https://play-lh.googleusercontent.com/a-/AFdZucqsmn5hool9tPYsFUUVch81GlfCaa57oPNL9aU0	Works really nicely. I'm glad I've started using this app - now I can procrastinate by doing somewhat important things instead of using YouTube. Jokes aside, I really appreciate the ease and developer-friendly nature of this open-source application.	5	1	3.4.2	2022-03-10 08:18:42	Thanks so much for your review. We're happy to hear Habitica has been helpful for you! If you’d like to share any feedback with us directly, you can do that via Menu - About - Support - Send Feedback.	2022-03-11 16:28:12
259	6d6b498f-8097-4718-aa2c-44a048b57a0f	Javad Zamani	https://play-lh.googleusercontent.com/a-/AFdZucq5O33aT1jpiAYQ9RKr4MgmMXkhwekKEkTyS95g3Q	Not worked for me.	1	0	3.5.1.3	2022-03-10 06:10:21	Hi, Javad! Sorry to hear that the app isn't working for you. If you continue to have trouble, please reach out to admin@habitica.com with details so we can help.	2022-03-11 16:29:08
260	a56dcd73-195c-4dd3-9afc-37a4bbc2109b	Laura Brandenburg	https://play-lh.googleusercontent.com/a/AItbvmm8u3-69xfFl-DXNeQ5VjqpG1sTVu9W6b6lbPa3=mo	Too complicated for me. :)	3	0		2022-03-09 13:07:41	Hi, Laura! Thank you for giving Habitica a try, but sorry you found it to be too complicated! If you want to keep adventuring with Habitica, you may find the resources at Menu - About - Help and FAQ helpful. There's also a wiki with lots of information: https://habitica.fandom.com/	2022-03-11 16:31:14
261	f705c6b1-b03c-4d07-a007-418b29357c06	Sara Kirby	https://play-lh.googleusercontent.com/a-/AFdZucr310C7vfrb6ZuYXKcNy3FrQOlS21IErdXgFbyvug	Really great. I like having reminders to get stuff done.	4	0	3.4.2	2022-03-08 18:36:01	Hi, Sara! Thanks so much for your review. We're happy to hear Habitica has been useful for you! If you’d like to share any feedback with us directly, you can do that via Menu - About - Support - Send Feedback.	2022-03-11 16:35:32
262	8a117690-dff5-495e-88a4-1198e70a1fa8	ShriekingGoblin	https://play-lh.googleusercontent.com/a-/AFdZucr9bwQbWqUpQMRAVgPOBgMsgYKCtfEJ3aPOgixDIw	It's cute, easy to use, and is great for helping you keep track of everything. If you have the creativity for it, you can turn even the most mundane of tasks into an epic quest. It also lets you choose the difficulty level of each task, which I greatly appreciate. You get rewards and experience for completing things and your hero is customizable as well. Essentially you can turn your life into an…	5	0		2022-03-08 18:11:23	Thank you for your review. We're happy to hear Habitica has been so helpful for you! And we're glad you enjoy the creative side of it. If you’d like to share any feedback with us directly, you can do that via Menu - About - Support - Send Feedback. Happy adventuring!	2022-03-11 16:37:55
263	50b90b21-b5d3-4d6a-b82c-2edf06d8c134	Jesse Gebhardt	https://play-lh.googleusercontent.com/a-/AFdZucrvaiJhLlPi4pxwKGCJ3j6wwhTcM0YCDOC9xUAh	2 moderators attacked me in Tavern Chat for "generalizing" after saying "Happy International Women's Day, what I appreciate most is women are nurturing and seem to take care of those around them, first" They went on to say "Some women do take care of themselves first" and stated that arguing with their ruling that I was "offensive" was against the Community Guidelines. I would stay if I didn't ca…	1	5		2022-03-08 18:08:30
264	ed5287c2-58a1-4200-bd1f-bac1a822ce6f	Ramune Noir	https://play-lh.googleusercontent.com/a-/AFdZucrXH1tt4TVqzlFL_wpTrE7v6aYP9wJaJSweLR1e	i kinda rated this 4 stars & 6 percent but since I can't do that i guess 5 is fine.. :'D this is really helpful since i really love RPG like games! i really hope it added more features to make it more exciting & RPG-like!	5	3	3.5.1	2022-03-08 07:45:50	Thanks so much for your review and generous rating. We're happy to hear Habitica has been helpful for you! If you’d like to share any suggestions, you can do that via Menu - About - Support - Send Feedback. Happy adventuring!	2022-03-11 16:42:40
265	5d7f0797-94b7-4bf7-8714-446d7fefc2fb	A Google user	https://play-lh.googleusercontent.com/EGemoI2NTXmTsBVtJqk8jxF9rh8ApRWfsIMQSt2uE4OcpQqbFu7f7NbTK05lx80nuSijCz7sc3a277R67g	Still loving it! Wish it would still works when offline.	5	0	3.3.2	2022-03-07 16:25:18	Thank you for your review! We plan to add offline mode in the future. In the meantime, if you’d like to let us know what features you’d use the most offline, you can do so via Menu - About - Support - Send Feedback.	2022-03-11 16:44:49
266	10a80d4b-6cfb-41eb-91b7-8eeb9cebe939	Katie Beth Tison Franklin	https://play-lh.googleusercontent.com/a-/AFdZuconIXYVGDctaHQ7UpGeuTIGSy-ovfPGY-HH2sb0tw	I've never tracked habits consistently for this long before. I live with a serious mental illness and Habitica helps keep me on track many days. I don't use the quests feature, just tasks and pets, and that's enough for me.	5	0	3.5.1.2	2022-03-07 01:57:35	Thanks for your review and kind words. They mean a lot to us! If you'd like to share any further feedback, please feel free to reach out via Menu - About - Support - Send Feedback. Happy adventuring and pet-collecting!	2022-03-11 16:52:22
267	f8c4aecb-cf43-4d7f-9f48-45f33a1fb922	Jeremy Jay Magdaong	https://play-lh.googleusercontent.com/a-/AFdZucrmB4QtmqKftUDvA41GZAuZYdy7SPqxA7lTxhewY8o	Great app! Can you add a feature where you can see a summary of the habits you did in a calendar format?	4	0	3.4.2	2022-03-06 14:16:44	Hi, Jeremy! Thank you for your review! Calendar view is a highly-requested feature, and we hope to add it soon. In the meantime, you may find this user-made calendar tool helpful: https://habitica.fandom.com/wiki/Strategitica	2022-03-11 16:52:52
268	3dcc7eaa-1e32-4330-882a-3837fda945a2	Eric Haynes	https://play-lh.googleusercontent.com/a-/AFdZucrivT7RWQtrLIAtRn0ShU0CGroZYD_CAio4pGq56g	The Game Of Life...Where Everything You Do Is Fun!	5	0	3.5.1.3	2022-03-06 10:26:43	Hi, Eric! Thanks so much for your review. We're happy to hear Habitica's gamification has been helpful and fun for you! If you’d like to share any feedback with us directly, you can do that via Menu - About - Support - Send Feedback.	2022-03-11 16:53:23
269	d8d08b3b-acfd-4a90-af41-959336677338	Umang Deep Rai	https://play-lh.googleusercontent.com/a-/AFdZucoyiwPEE4z9Kcsz7QrxCZOL3VztTMMZtbBlAm-E3g	The links for the challenges do not work. The links get displayed but clicking on them does nothing.	1	0	3.4.2	2022-03-05 04:05:36	Sorry to hear about this issue you're having accessing challenges. Please let us know if you're still having trouble via Menu - About - Support- Report a Bug and the team will look into it.	2022-03-05 18:58:15
270	5c2cbb7a-4005-4ff1-92f4-a6604a7aa399	Jun Yu Xian	https://play-lh.googleusercontent.com/a/AItbvmkXYdgDd4dL5HVluJPkFbtbWsikYrp65iz33pUO=mo	BANNING is alright, but why ban a person from all the features. That is quite counter productive and somehow conflicts to the purpose of the app. It is understandable to ban a person from chatting because it stops the offense from prolonging and also teaching a lesson, but banning an account from using the productive features is kinda nonsensical. In this kind of issue, uninstalling might be a fa…	1	3		2022-03-04 13:33:36
271	6fb08c38-c8d9-4d07-bb37-f7ea2ce5c04d	Bhagyshree Tambe	https://play-lh.googleusercontent.com/a-/AFdZucrdOCtPftbQVRD-KlewdtBmZFUSHnGfBTowro4IA5E	It's an amazing app. I uninstalled all other productivity todo apps because of this. The only thing it lacks is a pomodoro tracker and calender . Add that and I will uninstall tick tick as well. Then this will be my only app for productivity.	4	22	3.5.1.2	2022-03-04 04:24:58	Thank you! We're glad to hear you're finding Habitica useful. Calendar view is a highly-requested feature, and we hope to add it soon. You may find this user-made calendar tool helpful: https://habitica.fandom.com/wiki/Strategitica We have a suggestion form to help us keep track of what features users want: Menu - About - Send Feedback	2022-03-05 19:04:49
272	48981f33-3989-43dd-9fee-698c032816e7	soup schwab	https://play-lh.googleusercontent.com/a-/AFdZucr6-0RJCCUoAwzmQPDcI45hCgX-ymwPXQckct8YTw	really good app and very helpful for my motivation problems :)) would definitely recommend this too people with adhd/motivation struggles the reward system and whole kind of game theme is so helpful	5	0	3.4.2	2022-03-03 21:51:20	Thanks so much for your review. We're happy to hear Habitica has been motivating for you! If you’d like to share any feedback with us directly, you can do that via Menu - About - Support - Send Feedback. Happy adventuring!	2022-03-05 19:05:34
273	ff264425-2480-4c76-a0e7-85a6effd5784	Jess Lillie	https://play-lh.googleusercontent.com/a-/AFdZucpMuT2_VVrfaREmLm_mTyXDzf5cz0CTk3lQ83_QAI0	The most fun I've had completely tasks ever. Everything about this app is awesome for helping me stay on track and work through my ADHD. There's a good amount of free and paid options making it fun for everyone. This is my favorite app I have!	5	2	3.5.1	2022-03-03 14:39:03	Hi, Jess! Thanks so much for your review. We're happy to hear Habitica has been fun and motivating for you! If you’d like to share any feedback with us directly, you can do that via Menu - About - Support - Send Feedback. Happy adventuring!	2022-03-05 19:10:40
274	69a89725-ee0e-4ae7-bb80-29a7d5b2b5fe	CalindaCaya	https://play-lh.googleusercontent.com/a/AItbvmnPIwy8qX4mlQk0kv_u0q0LKv_-BCI5Vx8UaQMs=mo	Love, love, love!	5	0	3.4.2	2022-03-02 19:07:01	Thanks so much for your review. We're happy to hear how much you love Habitica! If you’d like to share any feedback with us directly in the future, you can do that via Menu - About - Support - Send Feedback.	2022-03-05 18:47:05
275	c8c1758a-7788-4630-9f93-86802756ac39	D M	https://play-lh.googleusercontent.com/a-/AFdZucr9VZwCf6QmyaOGGUWtrGKF4BBzAeE1xeJ5Qp_Fug	Love this app! Reliable! Hasn't failed me! Helpful to remember things! However if it is out of sight it is out of mind for the most part! Is it possible to have a widget that displays what current tasks needs to be done so I can just have it on my screen?	5	0	3.3.2	2022-03-02 18:33:30	Thanks so much for your review. We're happy to hear Habitica has been helpful for you! If you’d like to share ideas about a new widget for tasks, you can do that via Menu - About - Support - Send Feedback.	2022-03-05 18:48:04
276	f1060f6e-f82d-4f35-9bc7-859d010d9b15	Charlie Wagstaff	https://play-lh.googleusercontent.com/a-/AFdZucqPnnQuxsykzinR5KBsgq8iDIpNnSejHWMzFaAjgw	The core task management part of the app has all of the bells and whistles that you would expect, but it feels like it somewhat lacks polish and everything feels a bit rigid. It was never made clear how to access the gamified content that Habitica has, such as fights, which made me lose interest quite quickly. Overall, this app just doesn't do it for me unfortunately.	3	16	3.4.2	2022-03-02 09:07:15	Hi, Charlie! Thanks for trying Habitica out. The quests against monsters take place within your party, and all party members' success contribute to the battle. You can check the FAQ and Wiki if you want to learn more about those aspects: https://habitica.fandom.com/wiki/Habitica_Wiki	2022-03-05 18:55:10
277	f8fc43ff-9530-4f55-ae27-8df81fc0f365	Anthony Lee	https://play-lh.googleusercontent.com/a-/AFdZucoIjhkHcC-k1lmahiaRKNpn3T2I8ggM_XGWEYKb	Party quests are not displaying correctly	4	0	3.4.2	2022-03-01 03:20:54	Sorry to hear you're having trouble with the way party quests are displaying. If you’re still having issues, we’d love to take a look - you can send a direct report via Menu - About - Support - Report a Bug	2022-03-05 18:56:27
278	5ab7269c-53a9-4de9-b611-2450b62ddd29	Dita Aji Pratama	https://play-lh.googleusercontent.com/a-/AFdZucoi9vcG_jwtLMMudIntBsyBPQQIW9RUXNUKNZ8rbQ	I have audio issue, the BGM is not playing.	3	0	3.5.1.2	2022-02-28 12:22:26	Hi, Dita. There is no background music. There are sounds available for when tasks are completed, and you can check your audio settings to adjust those.	2022-03-05 18:50:56
279	1d054cc3-4857-41f3-9bf3-870dce04d22d	CHINMAY Pancholi	https://play-lh.googleusercontent.com/a-/AFdZucrhNVzxoCRenD9GQrSvk7lxwswL_LftiBB7g14lbw	Best!	5	0	3.4.2	2022-02-27 16:33:22	Thanks so much for your review and rating. We're glad you're liking Habitica! If you’d like to share any feedback with us directly, you can do that via Menu - About - Support - Send Feedback.	2022-03-05 18:52:52
280	cd962490-98ba-4e85-a18b-d08eb62fead5	Neha Sharma	https://play-lh.googleusercontent.com/a/AItbvmlFf1_cvIOlfHUDROxxR22TrEdMJwBjTS9qBeCl=mo	Thank you. I was able to do tasks I was piling up from days. Please keep working on this great thing.	5	0	3.4.2	2022-02-26 07:29:40	Hi, Neha! Thank YOU so much for your review. We're happy to hear Habitica has been useful for you in getting your tasks done! If you’d like to share any feedback with us directly in the future, you can do that via Menu - About - Support - Send Feedback.	2022-02-26 15:12:29
281	764f1340-3b62-4c7d-a423-b7f46a33cd5a	Lady S	https://play-lh.googleusercontent.com/a/AItbvmmBptWCd_84ff5pSCAtOg1YaormEvT3Ly1qOp64=mo	Cannot get back in after setting up my account- won't accept the password I set- won't recognize my user name. I tried to reinstall but no joy. I tried resetting password but no... I am uninstalling it again - quite disappointing	1	1	3.4.2	2022-02-25 20:59:43	Sorry to hear you're not able to log in. If you're still having trouble accessing your account, please contact admin@habitica.com and our staff will be happy to help.	2022-02-26 15:13:55
282	9dcab1db-fff7-4395-b9fa-30b078734a84	Ariazer	https://play-lh.googleusercontent.com/a-/AFdZucq48swS0_s-omoR4iI0m0-ONFi0uhjI5jgvkGEcjxc	I cant leave a challenge why is that?	3	0	3.4.2	2022-02-25 14:59:43	Sorry to hear you're experiencing an issue with leaving a challenge. Please let us know if you're still having trouble via Menu - About - Support- Report a Bug and the team will look into it.	2022-02-26 15:15:41
283	fbcbfa1f-dd5c-41ec-b474-9e97ee9268e9	Sigge Thorén	https://play-lh.googleusercontent.com/a-/AFdZucqWNjkQhJSpEqyeMpuOe5vKBLCzeviH1yK2TNxW8A	Best app I've had :D	5	0	3.4.2	2022-02-23 17:11:03	Hi, Sigge! Thanks so much for your review. We're happy to hear Habitica is working out so well for you! If you’d like to share any feedback with us directly in the future, you can do that via Menu - About - Support - Send Feedback.	2022-02-26 15:19:39
284	76102347-f88f-429c-87d9-15b4e025d7c2	Jazz Maghilum	https://play-lh.googleusercontent.com/a-/AFdZucpTcN2MAnCuFHTc4z7hX3Fq5m7734iudFDFwjVVQQ	I just wanna say this app really help me change for the better. Thank you	5	0	3.4.2	2022-02-23 05:54:54	Hi, Jazz! Thank you for your review. We're happy to hear Habitica has been so helpful for you! Keep up the good work! If you’d like to share any feedback with us directly, you can do that via Menu - About - Support - Send Feedback.	2022-02-26 15:20:26
285	a3e60176-71a4-456a-a9e3-a24c7a3485dd	Meg Kisner	https://play-lh.googleusercontent.com/a-/AFdZucpHylL_ZzH2bNtR2lwuGmgZkbZKMVHRvuNsgORc9Gw	This app changed the game for me - by turning the world into a game Thank you Absolutely brilliant	5	0	3.4.2	2022-02-22 03:09:24	Hi, Meg! Thanks so much for your review. We're happy to hear Habitica's gamification has been helpful for you! If you’d like to share any feedback with us directly in the future, you can do that via Menu - About - Support - Send Feedback.	2022-02-22 15:19:03
286	f8cf9ab7-f687-4d23-9f45-0249c0cfbd29	Robo Hand	https://play-lh.googleusercontent.com/a-/AFdZucq4RYU8Jd4ryF-c50Lw_fHyBzQ8Ev1Bd1rH_-BMIA	I have to spend an extra five minutes just trying to get items in a list stay where I put them. For example, I drag "Take out the trash" to beneath "Take out the recycle", and it instantly reverts 99% of the time (not exaggerating). Otherwise seems neat, too early to see if it's effective for me (not yet one day in).	3	26	3.5.1	2022-02-21 08:44:49	Sorry to hear that you're experiencing a bug when trying to reorder your tasks. Please let us know if you're still having trouble via Menu - About - Support- Report a Bug and the team will try to help!	2022-02-22 15:14:13
287	7397aa39-f786-4c7b-aea8-57bb120d8a47	suhaib odat	https://play-lh.googleusercontent.com/a/AItbvmlrkXQ8wvFfU20WJmY8bfi8viyWENuZAc1Z5NHm=mo	A great overall app I love the idea soo much and the cross platform features are so cool The app lag some times to update things I hope you can fix this in the future Anyways outstanding job guys and keep it up	5	0		2022-02-20 23:17:20	Thanks so much for your review. We're happy to hear you're enjoying Habitica! Please let us know where you're experiencing lag time via Menu - About - Support- Report a Bug so the team can look into it.	2022-02-22 15:13:03
288	bf505295-b1a0-4281-9e15-0727abac6a61	Jo Jo	https://play-lh.googleusercontent.com/a-/AFdZucolh_4X5iRO0NxyQYLwQ0XCgDMt8pAf5mfvewcYbQ	Changed my life for the better. Occasionally buggy but nothing too inconvenient	4	0	3.4.2	2022-02-20 06:12:09	Hi, Jo Jo! Thanks for your review! We're glad Habitica has been useful for you. You can help us fix any bugs you encounter by reporting them directly via Menu - About - Support - Report a Bug.	2022-02-22 15:08:50
289	fa76b619-d39a-48cb-9e97-549d9e13d3f2	Arthur Jackson	https://play-lh.googleusercontent.com/a-/AFdZucqyWqM_AnqvKWb85EyjvKNaZYohoPb5vD1e_XX_Ng	I like what this app WANTS to achieve. but there are a few fatal flaws. every time I log in, I LOSE health. and sometimes other things. I love the format, but it needs better instructions.	2	1		2022-02-19 20:48:58	Hi, Arthur! Thanks for giving us a try, but sorry to hear you’re having trouble learning to navigate Habitica. You may find the resources at Menu - About - Help, the FAQ, and the Wiki helpful. Wiki: https://habitica.fandom.com/wiki/Habitica_Wiki	2022-02-22 15:07:47
290	4dd93fda-3f5e-4752-b01f-3344dac17568	Drew Woods	https://play-lh.googleusercontent.com/a-/AFdZucr3aaajvV3z321nbHZuyGilMm6Ej6LTT6V3X_8ohig	Wow! Just absolutely wow! This is amazing. I've been looking for an android habit forming and task tracking app forever! This is it. And not only does it work well, it's GAMIFIED! WHAT???!!!! You heard me. It literally turns your life and chores and tasks into a game. 10/10 best app of the year. MVA (Most Valuable App) Highly HIGHLY recommended. I can't say enough about how awesome this is. Excit…	5	1	3.4.2	2022-02-19 13:31:58	Hi, Drew! Thanks so much for your enthusiastic review and your MVA award. Your feedback means a lot to us, and we're happy to hear Habitica has been helpful and fun for you! If you’d like to share any feedback with us directly as you continue to use the app, you can do that via Menu - About - Support - Send Feedback.	2022-02-22 15:06:09
291	c3757b1b-26e3-4c2c-95ae-973eb2388afd	amelie_unicorn queen	https://play-lh.googleusercontent.com/a-/AFdZucpmh_KaC3EEpdD9C8U1RGkQu04RIwqIXuirwnq4Yw	It's awesome, I use it to do everything and it feels so rewarding. It's amazing for nerodivergents and nerotypicals alike, everyone needs this app! :)	5	11	3.4.2	2022-02-18 17:01:33	Thanks so much for your review. We're happy to hear Habitica has been helpful and rewarding for you! If you’d like to share any feedback with us directly, you can do that via Menu - About - Support - Send Feedback. Happy adventuring!	2022-02-22 15:04:52
292	30f65a23-4e1f-4c9d-a20e-c6e131df7cea	Cricket Carine	https://play-lh.googleusercontent.com/a-/AFdZucoXhoFH2-Fjpuq3I-fdPsVi8k0cO4l6pSKKP0_a	I love this app. It really has motivated me to be more productive every day. I'll check it and think, "Man if I just had a few more coins, I could buy this." And then off I go to do a load of laundry or work out. My only real issue with the app is the syncing issues. Those ARE annoying, but the team seems responsive so I expect they'll be fixed soon. I also hope they add more normal pets! Would l…	5	31	3.5	2022-02-17 17:27:44	Thanks so much for your review. We're happy to hear Habitica has been motivating for you! You can contact us directly by going to Menu - About - Support - Send Feedback if you'd like to give us additional details about syncing issues you're experiencing. Check out the pets available in quests, as there are a lot of non-mammals including reptiles!	2022-02-18 14:22:26
293	f2dabcc0-87a8-4110-ac8b-60ed9257667f	Agus Ridwan	https://play-lh.googleusercontent.com/a/AItbvmmoHgkVWQm4YUO0th799a_y04ynoszKtaSWc-A8=mo	Best app for productivity for me	5	0	3.4.2	2022-02-17 14:44:36	Hi, Agus! Thanks so much for your review. We're happy to hear Habitica has helped you be productive! If you’d like to share any feedback with us directly, you can do that via Menu - About - Support - Send Feedback.	2022-02-18 14:19:18
294	2ddf112a-35a6-483a-9640-cfaff31ded36	Ania Vee	https://play-lh.googleusercontent.com/a/AItbvmnfHLXiJ99FkXGi9M_OkhUc3EB3y8juXQJTVAYX=mo	If you love RPGs and/or collecting, you'll probably like Habitica even if it doesn't offer real-world incentives. I even got a subscription so I could get more pets and gear. I've gained around 10k gold and have actually enjoyed putting work into the app itself. But lately I've inexplicably started losing health at a higher rate despite having fewer incomplete tasks and just lost ALL the gold. It…	4	1	3.3	2022-02-16 05:57:55	Hi, Ania! Sorry to hear about your losing gold and stats. If you think that might be in error, please submit a bug report so we can look into what might have happened: Menu - About - Support - Report a Bug. Just to note, you can also add real-world incentives to your rewards column.	2022-02-16 14:58:25
295	fd97f0c6-7d77-4082-9190-161f5636db64	Tom Macnoe	https://play-lh.googleusercontent.com/a-/AFdZucoJvsbLcLqLTK0DT6HzhDU7IfXp05x4XyW2nKZaIw	Brilliant app for helping you to make and keep new habits.	5	0	3.5	2022-02-16 03:13:57	Hi, Tom! Thanks so much for your review. We're happy to hear Habitica has been helpful for you! If you’d like to share any feedback with us directly, you can do that via Menu - About - Support - Send Feedback.	2022-02-16 14:59:19
296	82c8b8c9-2498-4fea-b849-f4c231c38c10	Jay Hanuman	https://play-lh.googleusercontent.com/a-/AFdZucpMILno_wsTnu7kyVGjSGrjnuTK8k7UYL6Bz13n	The best habit tracker I've ever used- and I've tried almost all the gamifiied versions. This is an all in one, and is FREE to use. There are no ads, no paywall to deal with, and there's a ton of incredible widgets and browser extensions to use as well. There's a reason why this rpg still leads the pack. The only time you would pay is if you'd want to support the team and unlock some extra (non-c…	5	105	3.5	2022-02-14 13:14:01	Hi, Jay! Thanks so much for your review and for being an enthusiastic Habitican! We're happy to hear Habitica has been helpful for you. We're committed to keeping essential features free and ad-free. If you’d like to share any feedback with us directly in the future, you can do that via Menu - About - Support - Send Feedback.	2022-02-16 15:05:26
297	65c02dc4-587d-4c6d-8505-447b2114eeac	Sunny Mccree	https://play-lh.googleusercontent.com/a-/AFdZucp4FUCLhYyBhFpptNq1II9WIFWgaCd8r18A-ERdJA	Been looking for a fun task app similar to epic loot for ios during the iphone gen2. Thanks for this	5	0	3.4.2	2022-02-14 08:35:18	Hi, Sunny! Thanks so much for your review. We're happy to hear Habitica and its gamification have been helpful for you! If you’d like to share any feedback with us directly, you can do that via Menu - About - Support - Send Feedback.	2022-02-16 15:09:40
298	a200c42a-a33c-4a12-8915-cda5fbd383a4	GXelz STudios	https://play-lh.googleusercontent.com/a-/AFdZucqN9i1GwUDxdzk50z8zde73FR1pIPSo7Uw6D06B	Best app ever 10/10 although I wished their was an option to reset your level to 0 and keep all your stuff or maybe a full reset. In previous games I loose interest after reaching lvl 100 but maybe that's just me	5	2	3.4.2	2022-02-13 20:26:14	Thanks so much for your review. We're happy to hear Habitica has been helpful for you! We now have an official suggestion and comment form to help us keep track of what features users want the most. You can find it via Menu - About - Send Feedback if you’d like to add your ideas about a different sort of reset.	2022-02-16 15:10:19
299	b8a3f1ed-a734-4ba5-b61c-ed8034d1d688	Ali Zein	https://play-lh.googleusercontent.com/a-/AFdZucqAGy7J5HKgrvMZyG5OUE-I6L_Dccxn_CcQw-LzTg	Buggy application, really irritating !!! Guys, please complete it by proper testing, your testers needs to be fired !	1	0	3.4.2	2022-02-13 12:10:08	Sorry to hear about you experiencing a bug. Please let us know what you're having trouble with via Menu - About - Support- Report a Bug and the team will look into it.	2022-02-16 15:11:14
300	525822a6-4081-40bf-b026-b3f8000d74d7	ImReza	https://play-lh.googleusercontent.com/a/AItbvmnwy6HLc1Pce8nzg6jhTgWLd6Ke1PqllRh7c7KcRQ=mo	Doesn't even deserve one star! If you live in Iran and can't use this... It's bcuz they banned you now go delete it.	1	0		2022-02-12 20:38:26	Hello! Sorry to hear about the trouble. Please email admin@habitica.com and we can look into this for you.	2022-02-16 15:13:45
301	78dd160d-d6ec-41b4-89f3-b3b67a3df765	Becca Yurkoski	https://play-lh.googleusercontent.com/a/AItbvmlFTETBoluoyNh5me5cM3APuErA-f1cmuN0SOru=mo	This is such a great way to get stuff done and have better habits. I love that you can pause dailies as needed as I have a couple disabilities that make it so sometimes I can't do my dailies. It's a lot of fun too. Only complaint is it's not very intuitive. There's features I just don't get and not sure where to look for explanations.	5	13	3.4.2	2022-02-12 18:19:40	Hi, Becca! Thanks for your review and kind words, they mean a lot to us! You may find the resources at Menu - About - Help and FAQ and the Wiki helpful: https://habitica.fandom.com/wiki/Habitica_Wiki	2022-02-16 15:23:02
302	836dc6db-1321-4f9d-b5c3-52b617b38f03	Richanne Matthews	https://play-lh.googleusercontent.com/a-/AFdZucpblg0J6eHJULqZ-7xY6eWgSSuWIQfC_wy_3_wP7k4	I much prefer other organizational/self-care apps to this one. Using negative punishment in tandem with positive reinforcement is a major turnoff, and it feels like I gain no real reward. I deal with that enough in my day-to-day. I also know that I will *almost always* end up skipping taks, and no in-game consequence will help me with that. I want to be rewarded for the stuff I *do* get done, not…	2	20	3.5	2022-02-12 16:27:48	Hi, Richanne! We appreciate the feedback and are sorry that we weren't a good fit for your needs at this time. Thanks for giving Habitica a try!	2022-02-16 15:25:53
303	454a8a54-7045-46c1-992a-1f365530142a	Suleiman	https://play-lh.googleusercontent.com/a-/AFdZucrjpjVFu0hWHtZCBZ3iaTBsKRStjUZeB7MavI8qyg	The app is good enough and kinda unique because of the gamification system. Although I found it a little confusing to use, not a big deal though, I just had to see two YouTube videos and read a beginner's guide (sarcasm intended). My complaint with it is that it works only online — if I were to make a task while being offline and I connect to internet later, all of those tasks get deleted. This i…	3	55		2022-02-12 14:14:46	Thanks for your review and feedback. We plan to add offline mode in the future. In the meantime, if you’d like to let us know what features you’d use the most offline, you can do so via Menu - About - Support - Send Feedback.	2022-02-16 15:27:32
304	f406f2e4-f89f-4f2c-881f-993df24cf9c4	Amos Fraccica	https://play-lh.googleusercontent.com/a-/AFdZucrc4JV1gb0lZ6t0p0HSkSKJNTdhOg3H_xdvTM-3T74	Really needed a to-do app that not only motivated me to do every day tasks but also one that holds me accountable when I procrastinate and or do not do something. Although I'm not terribly interested in earning rewards, achievements, buying things, I can see how younger users would enjoy it. I also like that I can set due dates, reminders, and schedule tasks every day, every other day, once a wee…	5	7	3.4.2	2022-02-11 14:10:56	Hi, Amos! Thanks so much for your detailed review. It means a lot to us! We're happy to hear Habitica has been motivating for you! If you’d like to share any feedback with us directly, you can do that via Menu - About - Support - Send Feedback.	2022-02-11 14:41:02
305	34b62de5-d17a-470a-b466-09d529630aec	Faysal Islam	https://play-lh.googleusercontent.com/a-/AFdZucqlpOdhiJwuWP_dxS1aFGXvzx9JvClSa-oYH4D0Lw	It's my second day & I'm having a lots of fun.🤩	5	0	3.4.2	2022-02-11 07:55:59	Thank you for your review. We're happy to hear Habitica has been so much fun for you! If you’d like to share any feedback with us in the future, you can do that via Menu - About - Support - Send Feedback.	2022-02-11 14:43:19
306	ddb2633b-72ab-409c-ab6d-7a038f09cdd9	Elizabeth Pierce	https://play-lh.googleusercontent.com/a/AItbvmn_OXCpaw2zsOq-v02oDMEXp5cCkGzhVYAbVCwW=mo	Love this. Helps motivate to stick to good habits and stay on task.	5	0	3.4.2	2022-02-11 03:41:10	Hi, Elizabeth! Thanks so much for your review and rating. We're happy to hear Habitica has helped motivate you! If you’d like to share any feedback with us directly, you can do that via Menu - About - Support - Send Feedback.	2022-02-11 14:44:07
307	367c4845-54f0-46d2-bf9f-b253a4d95264	Jahirul Islam	https://play-lh.googleusercontent.com/a-/AFdZucr3ZeLzTNw1xQR_TJhGl25GwXo5OAUnuQ9bvyAw	This app defeats many very popular task management app easily. Almost every task manager **deliberately** ignore supporting Markdown or support only 3/4 particular syntax. Some of them even lock important functions such as **Reminder** behind subscription. And the gamification feature makes this app only better. It would be nice to have a journal too. That would give us a complete option.	5	3	3.4.2	2022-02-10 06:39:15	Hi, Jahirul! Thanks so much for your detailed review. We're happy to hear Habitica has been helpful for you! We now have an official suggestion and comment form to help us keep track of what features users want the most. You can find it via Menu - About - Send Feedback if you’d like to add your idea about a journal or notes option.	2022-02-11 14:46:56
308	6d9d6c5d-9c6c-4c9b-b84a-d39ca1bd5daf	Umi	https://play-lh.googleusercontent.com/a-/AFdZucpp0sgsQNQg-4PCGb1o5dKK7hiDRBbbay9Ohu3bMw	This is a really great app! Now it feels like I'm living in an rpg game. You also can't help but do your tasks just to earn gold and exp. Thanks for making this great app!	5	2	3.4.2	2022-02-10 03:10:08	And thank YOU for your review. We're happy to hear Habitica has been helpful for you in accomplishing your tasks! If you’d like to share any feedback with us directly, you can do that via Menu - About - Support - Send Feedback. Happy adventuring!	2022-02-11 14:47:41
309	d168efc9-e869-471e-9258-1c09462e1b58	Heledd Straker	https://play-lh.googleusercontent.com/a-/AFdZucpa6fCjKnY5NMnrNuhPwlZ7c0OkutI_Q3xN7BO_tg	I have ASD and ADHD and this helps me great deal to establish and maintain routines in a fun way!	5	7	3.4.2	2022-02-09 14:55:44	Thanks so much for your review. It means a lot to us! We're happy to hear Habitica has been helpful and fun for you! If you’d like to share any feedback with us in the future, you can do that via Menu - About - Support - Send Feedback.	2022-02-11 14:48:21
310	cbd75bf6-36e9-4b50-a7db-d6ea460ec385	Celine Aubut	https://play-lh.googleusercontent.com/a/AItbvmkDw9wi89h-_w_SlXijnNmgWnnh9MHUr8IUwSkB=mo	This is so great! Exactly the motivation I needed! Love it!	5	0	3.4.2	2022-02-09 13:49:42	Thanks so much for your review. We're happy to hear Habitica has given you the motivation you needed! If you’d like to share any feedback with us directly, you can do that via Menu - About - Support - Send Feedback. Happy adventuring!	2022-02-11 14:50:45
311	442905d8-9d98-4b58-9bbe-61187c532f71	Rylen Nicole E. Aguas	https://play-lh.googleusercontent.com/a-/AFdZucrRrRI-TBCnzBvUvdFDCpD5H_tqgbSG5jmlf8-k	Please add an offline feature	4	0		2022-02-09 05:53:22	Thank you for your review! We do plan to add offline mode in the future. If you’d like to let us know what features you’d use the most offline, you can do so via Menu - About - Support - Send Feedback.	2022-02-11 14:39:42
312	74012ed2-332e-4472-810f-0d849a8bf0b6	Vedang Upadhyay	https://play-lh.googleusercontent.com/a-/AFdZucrrMTqwEZ2G7PWoCUVFyEzHwEZwGYyXuoPCkl8mrQ	You should add a offline mode , many times internet isnt available and habitica dosen't work.	4	0	3.4.2	2022-02-09 03:31:29	Thank you for your review! We plan to add offline mode in the future. In the meantime, if you’d like to let us know what features you’d use the most offline, you can do so via Menu - About - Support - Send Feedback.	2022-02-11 14:39:23
313	40931b84-62f3-4b09-8c19-0ff9cdcef1ea	Rexaura	https://play-lh.googleusercontent.com/a-/AFdZucoeoV2eSIb1H3b_sAGbPOtXz4gcuG8xmZoZFgz5Lg	I've replaced all of my daily checklists with this app. Gamifying my to-do's & daily chores this way motivates me to get those things done a lot sooner, especially if I'm grinding for food drops or trying to level up. Highly recommend if you're looking for an app to track both your habitual to-do's & one-time to-do's 💯	5	2	3.4.2	2022-02-08 23:04:40	Thanks so much for your review and rating! We're happy to hear Habitica has been helpful and motivating for you! If you’d like to share any feedback with us directly, you can do that via Menu - About - Support - Send Feedback. Happy adventuring!	2022-02-11 14:38:59
314	ea26d319-da2b-406c-b3c9-88bb2b24f160	Sai Nithin	https://play-lh.googleusercontent.com/a/AItbvmkuY-wf9BYV932FORotucxYvPU2kH5sgnikhBA=mo	Absolutely 5 star , great app 💪. SO many very useful features, must check this out.	5	4	3.4.2	2022-02-08 19:17:27	Hi, Sai! Thanks so much for your review. We're happy to hear Habitica has been useful for you! If you’d like to share any feedback with us directly in the future, you can do that via Menu - About - Support - Send Feedback.	2022-02-11 14:37:58
315	5b91fbfc-0940-4a80-8bb7-6b92b9cb447f	Keegan Perron	https://play-lh.googleusercontent.com/a-/AFdZucqpfOOkWgOQSDezEWZ8Eqkp5KCxMHv7WJhW8v4_Bg	Some aspects are irritating. For example I wish we could switch the side our pet was on so it's not always covering the mounts face 🤯. But overall a great and fun app.	4	0	3.4.2	2022-02-08 15:10:59	Hi, Keegan! Thanks for your review and feedback here! We have an official suggestion and comment form, if you'd like to add your ideas about improvements. You can find it via Menu - About - Send Feedback	2022-02-11 14:37:22
316	467df867-d130-400d-af26-1f9ad249d18b	Sarah Issler	https://play-lh.googleusercontent.com/a-/AFdZucqtcS9I_4nY1SBPm3002Ucm_v2wycHluJJcjNUhtw	I have ADHD and depression and this app is SO full of motivation and encouragement. It's simple to use and pretty intuitive for new users. I'm actually excited to do chores for the first time in my life. Thank you so much for this app.	5	1	3.4.2	2022-02-07 01:49:52	Hi, Sarah! Thanks so much for your review. It means a lot to us to know that Habitica has been motivating for you! If you’d like to share any feedback with us directly in the future, you can do that via Menu - About - Support - Send Feedback. Happy adventuring and getting those real life chores done!	2022-02-07 15:06:55
317	fe41dc67-4f30-4038-a656-a0e4cf0c6563	Theron Adrianne Bueno	https://play-lh.googleusercontent.com/a-/AFdZucpKA6ukAHZXXmOn4mM67eb7oVuxmK79TRT5sq3N1A	Doesn't save offline changes. Everything you did offline will not get reflected later when you're back online.	3	0	3.4.2	2022-02-06 10:57:03	Thank you for your review! We plan to add offline mode in the future. In the meantime, if you’d like to let us know what features you’d use the most offline, you can do so via Menu - About - Support - Send Feedback.	2022-02-07 15:08:20
318	f356e48c-5a9b-483c-a1f3-728b9a38afda	Ojas Bakshi	https://play-lh.googleusercontent.com/a-/AFdZucq0n-wQedkG5xEvvqtLjbcQ2ktMgdwC5_FtHPdLIw	First of a kind Application! Awesome 👍🏻 loved it!	5	0	3.4.2	2022-02-05 07:16:19	Thanks so much for your review. We're glad to hear how much you're enjoying Habitica! If you’d like to share any feedback with us directly, you can do that via Menu - About - Support - Send Feedback.	2022-02-07 15:10:15
319	cabc7e36-98b0-4d0a-a41d-b60f1256d3f6	Mohammad Qaddoumi	https://play-lh.googleusercontent.com/a-/AFdZucoOKhJGJERzsDIucxpdrgmtw8E7kODEOoBgwXNZyw	we need charts to review the progress	4	0	3.4.2	2022-02-05 05:41:06	Hi, Mohammad! Thanks for your review! We’re actually working on graphs and stats right now and hope to add them very soon! In the meantime, you may find the Data Display Tool one of our devs created helpful: https://oldgods.net/habitrpg/habitrpg_user_data_display.html	2022-02-07 15:10:57
320	2751965e-32fc-4977-adb9-14633dd63bc4	Wendolyn Trozzo	https://play-lh.googleusercontent.com/a-/AFdZucoz66CLiotWVm4fhEtTHDtrHEdiqrAcfzAMQoHPxA	Excellent app for tweens up as well as adults. Daily motivation, forming habits that you select, game like rewards, plus many social options (I joined discussion "guolds" for parents, runners, and writers). Having used it for 6 months now, it's still helpful and engaging.	5	2	3.4.2	2022-02-04 21:30:54	hi Wendolyn! Thanks so much for your detailed review. We're happy to hear Habitica has been motivating for you! Glad to know you're enjoying the community guilds as well! If you’d like to share any feedback with us directly, you can do that via Menu - About - Support - Send Feedback.	2022-02-07 15:13:34
321	bb7a34cd-3567-469d-84c4-ef33eea8761a	Rachel Swann	https://play-lh.googleusercontent.com/a-/AFdZucpBXYy9q42-RkSz4lSQXWLdloAHhJzYd8kHXVw1	I actually want to do stuff. I'm not useless	5	0	3.4.2	2022-02-04 09:31:06	Hi, Rachel! Thanks so much for your review. We're happy to hear Habitica has helped motivate you! If you’d like to share any feedback with us directly, you can do that via Menu - About - Support - Send Feedback. Happy adventuring and not feeling useless!	2022-02-07 15:15:01
322	ba7fed74-974e-4e2b-bd0b-b8cde073de00	Drew Mervin	https://play-lh.googleusercontent.com/a/AItbvmkk_n13HIi55wH3Y5-dWi7GYjQvkFvg1CdUoJs6=mo	Beautifully designed. Honestly I've been dreaming of an app that tracks and rewards my personal progress and this one feels like my dream come true. Big kudos to the developers!!	5	1	3.4.2	2022-02-03 21:50:53	Hi, Drew! Thanks so much for your review and enthusiasm. We're happy to hear Habitica meets your needs so well! If you’d like to share any feedback with us directly in the future, you can do that via Menu - About - Support - Send Feedback.	2022-02-07 15:15:48
323	22f9baa9-86d2-4580-9254-8135165dd915	美夏	https://play-lh.googleusercontent.com/a-/AFdZuco4LkPjQ0pqLHshvVtRUKuOgRRwcM0D6j718UhAgQ	I have consistently done all my tasks for 85 days in a row now. Turns out, the fear of losing my virtual gold and the items I gained is ALL the motivation I need. Thank you so much. You turned my life around. I will for sure buy gems to at least give back in some way. This app has been a tremendous help for my motivation and memory. I cannot thank you enough. EDIT: 190 days now. Thank you soo muc…	5	11	3.4.2	2022-02-03 09:27:33	Thanks so much for your review and your support. That means a lot to us, and we're happy to hear Habitica has been so motivating for you! If you’d like to share any feedback with us directly, you can do that via Menu - About - Support - Send Feedback.	2021-10-25 21:21:09
324	717fe07a-242d-49f3-a54c-6219b6c1e963	Vishesh	https://play-lh.googleusercontent.com/a-/AFdZucocPOxeU8pyaWMYEpnqPLP7P1LXcBNQdV8FOnhRZQ	My journey started	5	0	3.4.2	2022-01-31 05:12:39	Thanks so much for your review. We hope you enjoy your adventures and accomplishments while using Habitica!	2022-01-31 23:53:00
325	5e78e787-e2b2-470e-b668-120bdbed841b	Marcelo Laser	https://play-lh.googleusercontent.com/a-/AFdZucqBtSwUvNLEoFnz5gUCG-jrmFR4-SLtp8WmpuzN3g	It's great, but until they implement weekly and monthly tasks, it's not really suitable as a complete solution.	3	0		2022-01-30 21:31:02	Hi, Marcelo! You can set any task in your Dailies list to repeat weekly or monthly as needed. Hope that helps you as you continue to use Habitica! Here's some more info about that: https://habitica.fandom.com/wiki/Dailies#Repeat_Options	2022-01-31 23:57:50
326	26754643-2d78-406d-bbe0-26066bcd52c5	Fateme Sanati	https://play-lh.googleusercontent.com/a/AItbvmm1nFGxyT6nybOYCPeEi71g72pMpd55w6RwHWbS=mo	I can't register. Please help me	2	0	3.4.2	2022-01-30 13:29:39	Hi, please send us an email at admin@habitica.com if you're still having trouble registering.	2022-01-31 23:58:37
327	7404b6ac-0d4e-439e-8ffe-a22a860b989a	Dharmendra Kumar	https://play-lh.googleusercontent.com/a-/AFdZucq0gkFRmgp8IbFEWcVDKlALzc6GsW3J58goJZcJXg	Can you please improve graphics of character a little bit .	5	0	3.4.2	2022-01-30 11:52:44	Thanks for your review and rating. Our pixel artwork is done by volunteers from our community and is intended to evoke a retro style. Sorry it's not your cup of tea!	2022-01-31 23:59:11
328	abfb47f2-3025-4aa2-ae67-7412565e3889	YeWhatEva	https://play-lh.googleusercontent.com/a-/AFdZucoHcUN41D-yde-MnjeSeY-pVVEH5L7QbygHhRNN1g	It helps me do things that I want to do by rewarding my character. Always loved RPGs and this is just perfect for me. All my friends play with me and we party up to take on mobs. My friend Jesse has a flying pig mount he named pigasus. This game is dope	5	1	3.4.2	2022-01-29 21:19:06	Thanks for your review. We're happy to hear Habitica has been fun and useful for you! If you’d like to share any feedback with us directly in the future as you continue your adventure, you can do that via Menu - About - Support - Send Feedback.	2022-02-01 00:05:32
329	9a59874e-5d9e-48e1-a490-6f3574eb1578	Ceila Zel	https://play-lh.googleusercontent.com/a-/AFdZucqHUi2YJBpNKT1bA6bIEe7j7Gvnl0IASQgZLEqcti8	I use habitica on my phone and my laptop, and I find the app version a bit easier. I use it as a to do list as well as a habit reinforcer. You can get the most out of habitica if you join a party with your friends and do quests together, but before I did that, it was still a good motivator.	5	6	3.4.2	2022-01-29 15:53:58	Hi, Ceila! Thanks so much for your review about all the ways Habitica has been helpful for you! If you’d like to share any feedback with us directly as you continue your adventures, you can do that via Menu - About - Support - Send Feedback.	2022-01-31 23:33:58
330	3a42d293-cf0d-40d0-89b1-07b3b7d865a6	Stess Alvarado	https://play-lh.googleusercontent.com/a-/AFdZucqX0OYQyBKJghPEiri1hZZUs6LXackf9grAfRY8dg	Amazing app! It has really helped me to focus on what needs to get done in my life. A couple of suggestions on how this could be even better: 1st add a calendar function so we can look back and see when we completed a task (especially if it is repetitive task like doing laundry or washing dishes etc. to track our progress) and 2nd it would be great if it could sync with other calendars like googl…	4	28	3.4.2	2022-01-29 12:25:23	Thanks so much for your feedback. We're happy you're enjoying Habitica. We now have an official suggestion and comment form at Menu - About - Send Feedback if you’d like to add these ideas. You may also find this user-made calendar tool helpful: https://habitica.fandom.com/wiki/Strategitica	2022-01-31 23:35:39
331	d55bccad-238a-48ac-b0b1-fedbcaa03194	Marcial Mehilal	https://play-lh.googleusercontent.com/a-/AFdZucq6T6gNOL4nmJ6k34eapxWBttOaf0tawNQxd5n1rXw	Makes me want to go and do chores.	5	0	3.4.2	2022-01-28 21:15:20	Hi, Marcial! Thanks so much for your review. We're happy to hear Habitica helps motivate you to get your chores done! If you’d like to share any feedback with us directly, you can do that via Menu - About - Support - Send Feedback.	2022-01-31 23:37:10
332	d3defe16-ec83-4aac-b4b0-3deee5ef441e	Ventus Official	https://play-lh.googleusercontent.com/a-/AFdZucrxtHHWaXXZf8h6xltDRUpG-BDn-up5YZJF1pkhiw	The biggest thing habitica does right is multiplayer/community. The party and guild system and the users and community around them is just something I can't find in other apps. I think there are areas of improvement (like getting a calander system) but It does give an MMORPG Feel to the game.	5	1	3.4.1.1	2022-01-27 19:57:06	Thanks so much for your review. We're happy to hear Habitica and its strong community have been helpful for you! Calendar view is a highly-requested feature, and we hope to add it soon. In the meantime, you may find this user-made calendar tool helpful: https://habitica.fandom.com/wiki/Strategitica	2022-01-28 15:51:03
333	3d14cd7d-2407-4f2d-aee9-1e0b1830ee4b	kryke09	https://play-lh.googleusercontent.com/a-/AFdZucp20lW7OjN_KicjGDSVb0WoGhyb0vOGWuCU0gcI7g	It's fun but it really sucks that I work my tail off to get all my goals for the day and some todo's and everyday it takes away all of my coins and drips me levels. I'm not buying coins and gems if everyday you are just going to take them all away. That really needs to be fixed. It's actually discouraging and makes me want to stop trying to form new habits because what's the freaking point!	2	25	3.4.2	2022-01-26 13:31:59	Sorry to hear this. We don’t serve ads or sell user data for revenue and therefore can only support a small team, which responds to issues in the order they are received. You might ask your other party members to run a quest. More information on quests can be found on the wiki: https://habitica.fandom.com/wiki/Quests	2021-07-16 13:04:44
334	680d35b8-16bc-4ebf-8de8-6b08db078742	Taz Razer	https://play-lh.googleusercontent.com/a-/AFdZucpZvSDiMpSERRNRBUzzpdPFv9In48E-FEk-f9A_IA	Thank you so much for creating this, this is what I was unconsciously looking for, I even created something like this in the notebook, but as you can guess, it is very inefficient. The application is great, but it is not very smooth, but that's not important. Anyway, thank you for creating such a good app	5	16	3.4.2	2022-01-26 09:02:13	Thanks so much for your review and rating. We're happy to hear Habitica has been helpful and more efficient for you! If you’d like to share any feedback with us directly to help us improve the experience, you can do that via Menu - About - Support - Send Feedback.	2022-01-28 15:55:02
335	b98388af-dc1e-45e1-85bd-bb5cf8a1833e	Ali M	https://play-lh.googleusercontent.com/a-/AFdZucoDcw2LIurtpDeIrNl9FUv2fR8NfhjGkjx3-b3TrRU	I really really want to like this app, it's absolutely brilliant. But the fact that I'm not getting reminders for my dailies is really a bummer.	1	3	3.4.2	2022-01-25 14:39:14	Thanks for using Habitica. There's a support ticket open right now for fixing notification sounds, so we're hoping to have that fixed as soon as possible. If you’re still having issues with reminders, we’d love to take a look - you can send a direct report via Menu - About - Support - Report a Bug	2022-01-28 16:00:17
336	8832150c-a1d0-4e07-b4ce-e721236db6f1	dumgummy	https://play-lh.googleusercontent.com/a-/AFdZucoVzyWAhmA40DauxnFmEG_BuoOSDm8irzefyFvN0Q	love it, u can chat with other people around the world in tavern, u got to choose your class (mage, healer, rouge, warrior), mine is mage and u can organize your task checklist, 1000 stars! ⚡	5	4	3.4.2	2022-01-25 10:32:59	Thanks so much for your review. We're happy to hear Habitica has been helpful and fun for you! If you’d like to share any feedback with us directly, you can do that via Menu - About - Support - Send Feedback. Happy adventuring, magical mage!	2022-01-28 16:01:09
337	0a2ac910-4d2a-4744-a786-c6b9665cb217	ULADZISLAU ZHYKH	https://play-lh.googleusercontent.com/a-/AFdZucq8EjhAOQQhvM7IPj-CRnof9TfZp_3I3t044UtHnA	Приложение, которое действительно помогло следить за привычками и их вырабатывать	5	0	3.4.2	2022-01-23 19:24:37	Thank you for your review. We're happy to hear Habitica has been really helpful for you in building good habits! If you’d like to share any feedback with us directly, you can do that via Menu - About - Support - Send Feedback.	2022-01-28 16:03:52
338	411291ff-8583-4570-b32e-7d7518b3a4a0	praveen	https://play-lh.googleusercontent.com/a/AItbvmnD_TZOtRR-k5-aWofFW2G3nX3kEMvGFWJB07de=mo	Most helpful thing i found on playstore. Thank you for not adding ads in your app.	5	0	3.4.2	2022-01-23 11:42:19	Thanks so much for your review. We're happy to hear Habitica has been helpful for you! We are committed to keeping Habitica ad-free. If you’d like to share any feedback with us directly in the future, you can do that via Menu - About - Support - Send Feedback.	2022-01-28 16:04:35
339	21c02128-c76b-4202-b9e3-4a3f85f75c38	Somebody Else	https://play-lh.googleusercontent.com/a-/AFdZucpPhrxgdL2LWnukweH_ZoiByIYarANN9Bf9POwPMQ	I've used this app for years off and on. I stay because I like my party and I want to unlock all the pets and mounts in every color. It's not a strong motivator for me, but it keeps me on the app. My main complaint is the lack of organization. The to-do's are hard to organize. I think there should be sections. Notifications often don't work, and I don't like the habits section. I use this app in …	4	25	3.4.2	2022-01-23 04:12:50	Thanks so much for your review and for being a long-time Habitican. We're happy to hear Habitica has been helpful and motivating for you! If you’d like to share any feedback with us directly about notifications or the habits section to help us improve, you can do that via Menu - About - Support - Send Feedback.	2022-01-28 16:05:36
340	1b63aeee-feb9-4616-9bd1-89fa0b77a6d7	Jason Rae Aragon	https://play-lh.googleusercontent.com/a-/AFdZucpXmCoADJQ0eptBwGCoRB679IRzM5uxeVAmzKVSBg	Please, please, please add an option to see my streak in calendar view.	4	0	3.4.2	2022-01-21 17:53:46	Hi, Jason! Thank you for your review! Calendar view is a highly-requested feature, and we hope to add it soon, In the meantime, you may find this user-made calendar tool helpful: https://habitica.fandom.com/wiki/Strategitica	2022-01-22 16:15:39
341	6dde8a46-4c2b-424f-af3b-9d715dca803e	That Gum Is Climbing Out of Your Mouth	https://play-lh.googleusercontent.com/a-/AFdZucrgvMC7P95yq9vifYcWvQmcDe1nVdjYEAdW7N73Rw	Please add an option to make multiple lists.	3	0	3.4.1.1	2022-01-21 03:54:12	Thanks for using Habitica. If you want multiple lists, you can create tasks each with their own subtasks. There are also already separate lists for habits, dailies, and to dos to help you keep those separate.	2022-01-22 16:18:57
342	c1eeb429-ef95-4e53-83f1-e34bba1ae194	Richard Oliveira	https://play-lh.googleusercontent.com/a-/AFdZucrFLnzUXzwm0XIXHgaxQ-_oA5fqhFs38YSy9pTwDw	Best app for habitc tracking, brought along with a fun gaming experience. Don't forget to join guilds or go to the tavern to socialize with others, might as well help you on your goals.	5	2	3.4.2	2022-01-20 13:19:03	Hi, Richard! Thanks so much for your review. We're happy to hear Habitica and its community have been helpful and fun for you! If you’d like to share any feedback with us directly in the future, you can do that via Menu - About - Support - Send Feedback.	2022-01-22 16:21:06
343	f084a38b-5ffb-4c5e-844a-7eec39f69b65	Nicole De Roo	https://play-lh.googleusercontent.com/a-/AFdZucrrw5jrgOfnVfYPiUPYJJx6w-h10b-54Eag-H0r5Q	Since I started using this app, I have managed not to miss a single day of some very important tasks - a first for me in my life. The gamified habit building meshes well with how my brain works. Where it loses a star is its CRON system. Instead of keeping stat boosts from your party for 24 hours, they are reset to 0 the moment you open the app after local midnight. This promotes procrastination (…	4	4	3.4.2	2022-01-20 03:41:36	Hi, Nicole! Thanks for your review and feedback! We're glad to hear that Habitica has been helpful for you. We now have an official suggestion and comment form to help us keep track of what features users want the most. You can find it via Menu - About - Send Feedback if you’d like to add your ideas about retaining stat boosts from your party.	2022-01-22 16:25:40
344	316ed655-4ed1-4e6e-b9c2-4d6aabf4a469	Zay Parker	https://play-lh.googleusercontent.com/a/AItbvmnIgjdlDjU1d3Ta2-xkpvtkkPu5mE2Qtb911F_v=mo	Absolutely loved this app while using! Made me feel good about myself for completing my goals but I have to uninstall as (this is a personal issue, not the game's) I feel bad for no longer completing my goals. My character has been in the tavern for a while waiting for me to become motivated again but it just hasn't happened. I have taken a screenshot of the app so I can find it again when I am r…	5	20	3.4.2	2022-01-20 00:56:50	Thanks so much for your review and recommendation. We're happy to hear Habitica has been helpful for you and hope that your motivation returns soon so that you can continue your adventures with us!	2022-01-22 16:27:33
345	72c76204-4445-48a2-8d72-5aab1ea933f3	Max	https://play-lh.googleusercontent.com/a-/AFdZucql18QNJzUh5UfUEIgTnj7I3nX3OqZwPs2GFDTa5A	Doesn't even accept the password while registering	1	0		2022-01-19 21:15:19	Sorry for the inconvenience. Facebook login is disabled. If that's what you were trying to use, try registering a different way. If you continue to have trouble, please reach out to us at admin@habitica.com so we can help you set up or access your account.	2022-01-19 21:34:16
346	cd836b48-240c-4282-9a46-e09385c845ef	Elizabeth Sullivan	https://play-lh.googleusercontent.com/a-/AFdZucqu3sSk5faOnOFBGfr18ZyYd2lanV_AK_Cmkzo4	I have the pro version so I can't really speak to how the ads are but I really like this app. The game elements really encourage you to stay motivated.	5	6	3.4.2	2022-01-19 10:16:13	Thanks for your review and for being a subscriber! We're glad to hear that Habitica has helped you stay motivated. We don't serve ads in the free version either.	2022-01-19 21:36:18
347	7ea009d6-2cac-42e1-8c5b-652535b473cf	Jason Bristol	https://play-lh.googleusercontent.com/a-/AFdZucr_3kUYnfkQKpVRR4JCn_tGh2AjdWPmH_HE11jgUGo	Whoever thought of this deserves a medal, thank you for providing a fun way for my fiance and I to keep our habits in check, also for helping me find a way to get her to play a video game with me 😂	5	0	3.4.2	2022-01-19 01:11:37	Hi, Jason! Thanks so much for your review and rating. We're happy to hear Habitica has been fun and helpful for you and your fiance! If you’d like to share any feedback with us directly, you can do that via Menu - About - Support - Send Feedback.	2022-01-19 21:39:29
348	93b5edb8-6c59-4416-9a8c-21005f0e2a45	ManfromtheRedRiver	https://play-lh.googleusercontent.com/a-/AFdZucrjjPDZ1JH1ZScpReByzHJ42IXIqI0weUUuwdJkpA	I LOVE the idea of this, but it doesn't seem to be well done. The only thing you can set up are daily tasks in a list form. There is no sort of calendar overview (No weekly or monthly view to get any idea of what my schedule should look like). I do hope they develop this into something amazing.	2	33	3.4.2	2022-01-15 20:22:20	Thank you for your review! Calendar view is a highly-requested feature, and we hope to add it soon, In the meantime, you may find this user-made calendar tool helpful: https://habitica.fandom.com/wiki/Strategitica	2022-01-19 21:48:24
349	bc61d83e-ce17-424e-ba08-62576a79baa5	Harsh Chhajed	https://play-lh.googleusercontent.com/a-/AFdZucrxhgbDPxvrjlRkcAqhpx9hiYrHvVNwMvNE4xm2sw	Best positive good features app. Goal habits focus.	5	0		2022-01-15 15:46:40	Thanks so much for your review. We're happy to hear you are enjoying using Habitica! If you’d like to share any feedback with us directly, you can do that via Menu - About - Support - Send Feedback.	2022-01-19 21:46:11
350	ebd82320-4217-4121-b89d-70a4326d9524	Ramona Giles	https://play-lh.googleusercontent.com/a-/AFdZuco4kVC34uAUFvAzlLawbp1VG7Lm3dzNI293AnioOQ	I wanted to stop using it, as I used to do it with a friend, but Habitica is so good I can't even find a decent replacement.	5	0	3.4.0.2	2022-01-15 10:11:45	Hi, Ramona! Thank you for your review. We're glad to hear Habitica has been more helpful for you than other apps out there! If you’d like to share any feedback with us directly to help us meet your needs, you can do that via Menu - About - Support - Send Feedback.	2022-01-19 21:45:44
351	dbb9d6a3-d461-4710-8dad-993b301d2b30	Round Arthur	https://play-lh.googleusercontent.com/a-/AFdZucrVngVAc04CYcq_DFQOUAa6dVI_-zAZBvHjWmxA	Best to-do list app i have found.	5	0	3.4.1.1	2022-01-14 14:19:14	Thanks for your review and rating. We're so happy to hear Habitica is the most helpful app for to do lists that you've found! If you’d like to share any feedback with us directly as you continue to use it, you can do that via Menu - About - Support - Send Feedback.	2022-01-14 18:49:12
352	6ba5a81f-fdeb-4ab9-bd5d-b85a4567dbdb	dara	https://play-lh.googleusercontent.com/a-/AFdZucrJ0IEOoxcaIOZQNZy6PX72q6j7tBvYMA8BQPtn5w	This actually works really well for me :)	5	0	3.4.1.1	2022-01-14 12:03:29	Thanks so much for your review and rating. We're happy to hear Habitica has been helpful for you! Keep up the good work! If you’d like to share any feedback with us directly, you can do that via Menu - About - Support - Send Feedback.	2022-01-14 18:48:17
353	37ffc634-2f8c-491c-906e-8a1082c387f7	Desmond Granger	https://play-lh.googleusercontent.com/a-/AFdZucp-DgEAQ1IiUZQXoErvOOeSO0GsH4OBpT0rJJ-x	I Love this app! Gets intense sometimes but I enjoy it and it's useful.	4	0	3.4.1.1	2022-01-12 01:07:15	Hi, Desmond! Thanks so much for your review. We're happy to hear Habitica has been useful for you! If you’d like to share any feedback with us directly, you can do that via Menu - About - Support - Send Feedback.	2022-01-14 18:36:02
354	e6f07548-58c3-4216-b9b2-492095a1ef62	Takai Mayuko	https://play-lh.googleusercontent.com/a-/AFdZucpd-A2XZN52glLIT2QQmucYTRKR7v9Mbs7Y3Csm	I would really love for the weekly tasks to be able to check them of earlier in the week if thwir already done by that point and that status to be remembered until the day it is "due". I.e I am a student and have homework I get weekly and it needs to get done by Monday, some other needs to get done by Tuesday. And I sometimes finish the homeqork ahead of time but on the day it is due my Checkmark…	3	2	3.4.1.1	2022-01-11 08:08:30	Thanks for your review and feedback! We now have an official suggestion and comment form to help us keep track of what features users want the most. You can find it via Menu - About - Send Feedback if you’d like to add your ideas.	2022-01-14 16:52:40
355	6d1a18f9-5b16-4ab3-aac0-a0794f7d2c64	sylla	https://play-lh.googleusercontent.com/a-/AFdZucqoDvhi9aU4b-sRpwjoTc0fCzrxe9F5BKbJC4bb8lI	I AM IN LOVE	5	0	3.4.1.1	2022-01-10 20:17:43	Hi, Sylla! Thanks so much for your review. Your enthusiasm means a lot to us! If you’d like to share any feedback with us in the future, you can do that via Menu - About - Support - Send Feedback.	2022-01-14 16:51:06
356	f1a80323-23a2-47bb-8367-434e09003f5f	Caleb Crepeau	https://play-lh.googleusercontent.com/a-/AFdZucqodRjwsP1WoSAeqd8Ge1756XF4IekP6GG20TPR	I suffer from various mental illnesses and this app is really helping me take care of myself and improve my life.	5	0	3.4.1.1	2022-01-10 05:16:26	Hi, Caleb! Thank you for your review and rating. We're happy to hear Habitica has been so useful for you! Keep up the good work! If you’d like to share any feedback with us directly, you can do that via Menu - About - Support - Send Feedback.	2022-01-14 16:47:23
357	b214c374-ab3f-4468-9156-471be52e242f	M Scott	https://play-lh.googleusercontent.com/a-/AFdZucr6w-GZZQee8GUVoyeWCmmbt6Nhl0GLEowA10APIQ	Excellent habit and task tracking app. The gamification really helps make you want to achieve the goals you've set. Also I LOVE that there are no ads! I'm a new user in the past week but I am really loving this app.	5	3	3.4.1.1	2022-01-08 15:22:22	Thanks so much for your review. We're happy to hear Habitica has been helpful for you in achieving your goals! We're committed to keeping it add-free as well. If you’d like to share any feedback with us directly, you can do that via Menu - About - Support - Send Feedback.	2022-01-14 16:45:12
358	6aaa689d-4eba-44ea-9e31-65aa4a43f93f	TheWalkingAmongTheDead	https://play-lh.googleusercontent.com/a-/AFdZucqUDJ_hNsL8wfwx9CTPdDCla-MxrjJTzltsah5YEA	Great concept, well developed, but it's hard to use and that makes it terrible to follow through with your daily tasks.	4	0		2022-01-08 04:51:29	Thanks for your review! We'll keep your feedback in mind as we continue to work to improve Habitica. You can contact us directly by going to Menu - About - Support - Send Feedback if you'd like to give us additional details about what aspects are hard for you to use. You may also find the resources at Menu - About - Help and FAQ helpful.	2022-01-14 16:43:20
359	d2829ee6-404a-4da9-8d36-9ec1284a5050	Alejandro Lopez	https://play-lh.googleusercontent.com/a-/AFdZucpiFf0e2HUoc0EY2Ec5T8Y00SNZN8C8N7Lp_K1aNw	I have been using it for a week and it's awesome ..but.. I'm generally out of internet and that's where the problem come, it doesn't work without internet	5	2	3.4.1.1	2022-01-07 21:12:59	Hi, Alejandro! Thanks so much for your review. We're glad Habitica has been helpful for you! We plan to add offline mode in the future. In the meantime, if you’d like to let us know what features you’d use the most offline, you can do so via Menu - About - Support - Send Feedback.	2022-01-07 19:52:59
360	f627d43b-3ad1-416c-b090-18d62933fced	Oxomia Soli	https://play-lh.googleusercontent.com/a-/AFdZucpnla4wmR7x2B20F0e5qlqfZcOH1B5vYYURdAuQ	Personally I loved Habitica and recommend it to all my friends. This app helped me tremendously in my exams. About this app: It lets you add daily tasks, to-dos, habits, and on completion of each task you're rewarded with pets, pet food, coins, etc. As a student you can manage your assignments and syllabus, or even a daily habit you'd like to cultivate. It's different from other productivity apps…	5	29	3.4.1.1	2022-01-07 17:48:45	Thanks so much for your comprehensive review and for recommending it to your friends. We're happy to hear everything you enjoy using about Habitica! We're dedicated to keep it free and fun. If you’d like to share any feedback with us in the future, you can do that via Menu - About - Support - Send Feedback. Happy adventuring!	2022-01-07 19:40:28
361	e86a5b15-42ea-459f-8d82-0dd4805fcafa	Mahima	https://play-lh.googleusercontent.com/a-/AFdZucq04QLDfKYoYwdb1-JIRliiXudy6ZjfJCbcj_lmD6w	The app is great but the volume of the audio themes is too much, it would be greatly helpful if there was an option to adjust the audio theme volume in the app. Its too loud even when my media volume is on the lowest possible setting other than zero.	4	4	3.4.1.1	2022-01-07 17:27:01	Thanks for your review! We'll keep your feedback in mind as we continue to work to improve Habitica. You can contact us directly by going to Menu - About - Support - Send Feedback if you'd like to give us additional details.	2022-01-07 19:41:12
362	b097bfe1-5def-49cc-84b6-fae102443be4	Forrester	https://play-lh.googleusercontent.com/a-/AFdZucoqm_QQ4b4EtQouFyKTg3H73-ooZwyAZ9xTlP3lvg	This is hands down the most polished and feature rich habit tracker on the market. What's more, the habit tracking is 100% free! There is an incredibly engaging and fun RPG attached to it, and this is where they make their money from cool cosmetics for a very reasonable price. I'm so happy I found this app.	5	2	3.4.1.1	2022-01-06 04:24:51	Hi, Forrester! Thanks so much for your review. We're happy to hear Habitica has been helpful and fun for you! If you’d like to share any feedback with us directly, you can do that via Menu - About - Support - Send Feedback.	2022-01-07 19:52:06
363	1a3bb288-3e22-4f82-ac4b-55fbd58ddf08	Aria Surya Prana	https://play-lh.googleusercontent.com/a-/AFdZucp1zWTxzMyTwmQ9MyJtc8RzFSIT93rJ3xQOHtAxqA	Absolutely great app! One thing that keeps it from being perfect is that, it would be better if you can add pictures in your to do list or dailies. It would also be great whenever you missed the deadline in the to do list, you'll lose a health or damage a point.	4	15	3.4.1.1	2022-01-05 13:00:07	Aria, thanks for your review and feedback! We now have an official suggestion and comment form to help us keep track of what features users want the most. You can find it via Menu - About - Send Feedback if you’d like to add your ideas.	2022-01-07 19:54:02
364	5aee6e8b-c0d1-4f01-914c-5f83451258e7	mega weird	https://play-lh.googleusercontent.com/a-/AFdZucrFTwUhbh1S5AK9yX128r4DctjzQXwiBedpDyQBNw	Very helpful way to get me to complete my tasks! It is also super fun with joining a party and having eachother to help you out :)	5	0	3.4.1.1	2022-01-04 15:21:13	Thanks so much for your review. We're happy to hear Habitica has been helpful for you and that you're enjoying working with your party to defeat monsters and support each other! If you’d like to share any feedback with us directly, you can do that via Menu - About - Support - Send Feedback.	2022-01-07 19:55:09
365	c1ba1522-d064-4b55-9b16-42fe626eb543	Allu	https://play-lh.googleusercontent.com/a-/AFdZucoRXVUd4_UGMdPGE20GQLJekkE3OWWH9OoYytYIoQ	This is Awesome!	5	0	3.4.1.1	2022-01-04 14:37:44	Thanks so much for your review. We're happy to hear you think Habitica is awesome! If you’d like to share any feedback with us directly, you can do that via Menu - About - Support - Send Feedback.	2022-01-07 19:55:35
366	c8f314d0-7e0e-421d-9662-87bb5eca8173	Carlota Figueiroa	https://play-lh.googleusercontent.com/a-/AFdZucoE3qqv19TbBnmLXSDy_Kd0uxvMJYOOQRoLZFjLAQY	Absolutely love it. I have adhd, it was becoming impossible to organize my day. With help of my psychologist i tried everything possible. This was the only thing that helped. Its free, it has alarms and notifications. Its the best app in play store. Also, you can use it both as a game and/or comunity. The sky is the limit. Keep up the great work. Hope you never change	5	5	3.4.1.1	2022-01-04 12:08:19	Hi, Carlota! Thanks so much for your detailed review. We're happy to hear the many aspects of Habitica have been helpful for you! If you’d like to share any feedback with us directly, you can do that via Menu - About - Support - Send Feedback. Happy adventuring!	2022-01-07 19:36:12
367	1fb38d4c-67f3-48e2-8caa-7ee3174a2747	ivan	https://play-lh.googleusercontent.com/a-/AFdZucpEER5QiMe-llTx2HH9tt9GZBQd1TDxwl79lLWpzZE	Love the concept and the execution is wonderful. I'm a rewards-oriented person so this really keeps me motivated to do my tasks. One thing I'd like is to have a timetable/calendar view of habits and dailies, to have a review as to when the user missed the most tasks. I also second a previous review's recommendation of a notes option, as it could really boost the productivity.	4	20	3.4.1.1	2022-01-03 15:27:04	Hi, Kon! Thanks so much for your review. We're happy to hear Habitica has been helpful and motivating for you! Calendar view is a highly-requested feature, and we hope to add it soon, In the meantime, you may find this user-made calendar tool helpful: https://habitica.fandom.com/wiki/Strategitica	2022-01-07 19:26:36
368	13f7d36a-8b25-4115-ac4c-d4a4fcf0ecb5	Made Bagus Erlangga	https://play-lh.googleusercontent.com/a-/AFdZucprQ7Mlqlx_P51I4qMIItBo0sM3b_bRCdAu2Y2yQw	The widget and task sorting option is not good. Either way, it is a great concept	3	0		2022-01-03 08:12:29	Thank you so much for this thoughtful review. We'll keep your feedback in mind as we continue to work to improve Habitica and the widget functionality. You can send us feedback and requests directly by going to Menu - About -Support - Send Feedback.	2022-01-07 19:24:17
369	16b21fa7-20f8-4ffc-a849-ef5ddc5e9d26	Hydrasfool	https://play-lh.googleusercontent.com/a-/AFdZucpceCYCd5aUdHhWGKn9hyLw1R7hpb4e9FkT3Hdiqw	This is super fun except character customization at the beginning	4	0		2022-01-03 06:50:27	Thanks for your review and feedback! We now have an official suggestion and comment form to help us keep track of what features users want the most. You can find it via Menu - About - Send Feedback if you’d like to add your ideas to help us improve character customization at the beginning.	2022-01-07 19:20:59
370	c659bde3-42ba-4f85-813e-b1c38d8ac6e3	Yogi Firdaus	https://play-lh.googleusercontent.com/a-/AFdZucpqlRNzDcqk1gfxxNYTn13N_Pl-Pmy7bTvZNGb0fA	It's a pretty good app. But can you guys update the home screen widget UI? I like the anydo widget UI, but i want to use Habitica.	4	0	3.4.1.1	2022-01-02 07:37:51	Thanks for your review and feedback! We now have an official suggestion and comment form to help us keep track of what features users want the most. You can find it via Menu - About - Send Feedback if you’d like to add your ideas about improving the widget user interface.	2022-01-07 18:59:47
371	ef7dfbc1-0a33-40b5-85be-786eaa444356	C T	https://play-lh.googleusercontent.com/a-/AFdZucqPSwP01uTdzfFhdr5NZaU1eBNYSXUPhCK_tr61HA	Love this app. I think it is very useful and fun. Combining real-life, every day and long term tasks and goals with an RPG character leveling system of sorts. With a Habits, Dailies, and To Do tabs... I think if you are unmotivated this app could potentially help you also helpful for organization. I don't feel the "pay to play" that anyone is talking about. I don't think that is the main point of…	5	0		2022-01-01 20:16:34	Hi, CT! Thanks so much for your detailed review. We're happy to hear Habitica has been helpful for you with motivation and organization! If you’d like to share any feedback with us directly in the future, you can do that via Menu - About - Support - Send Feedback.	2022-01-07 18:55:26
372	51154549-020b-45f5-a754-dc474a376bc1	Devin Lanio	https://play-lh.googleusercontent.com/a/AItbvmmqY6wQfqPYASTiuPGLFOJ3ZA2OsY987lKjrC-R=mo	Really looking forward to leveling up my avatar and unlocking new items. Really helps accountability.	5	0	3.4.1.1	2021-12-31 23:44:03	Hi, Devin! Thanks so much for your review. We're happy to hear Habitica has been helpful for you in staying accountable! If you’d like to share any feedback with us directly in the future, you can do that via Menu - About - Support - Send Feedback.	2022-01-07 18:47:55
373	70c23223-883d-4a53-8358-160ac7605671	Benjamin Gaylord	https://play-lh.googleusercontent.com/a-/AFdZucrkY9VaMc36t15JLv6JicFrHQwDqo1F9_t0BV1q	Doesn't seem to work anymore, like at all: I haven't lost any health in an entire year for failing to check in (I am NOT using the "tavern" to pause tasks), and it seems that it fails to even remain running in the background. I have to manually start the app to interact at all, and that defeats the entire purpose of it for me. I absolutely rely on the notification reminders, which stoped working …	1	25	3.4.1.1	2021-12-31 20:33:09	Hi, Benjamin! Sorry that notifications aren't working for you. We're working on notification reminders now, but sending us a bug report will help give us more information to work with: Menu - About - Support- Report a Bug	2022-01-07 18:47:11
374	e58dd902-c9cc-4891-8d38-e120126bbc22	Rachel Blandon	https://play-lh.googleusercontent.com/a-/AFdZucpxPzGg-1FvFg_WyjThikSocabezSzijHl81rSC6w	Habitica is a good app with a lot of enjoyable features that make it worthwhile, but it also has a lot of bugs and glitches which cause overall functionality to suffer. Also, sometimes customer service is unresponsive. I never know when or if they will get back to me. Some sort of help ticket system would be useful.	4	13		2021-12-29 14:13:30	Thanks for your review and feedback! You can continue to help us fix bugs by reporting them directly via Menu - About - Support - Report a Bug. Our small staff replies to the requests in the order they are received, and during galas or the end of months, we have a higher than usual volume. Sorry about the wait!	2021-12-31 17:36:02
375	a7076458-dc08-421f-9df5-c7e480392f1a	Oliver Abrey	https://play-lh.googleusercontent.com/a/AItbvmm8HqwXjV8z4DaURbwuEmwcFZlzVCeCgGdQRMm3=mo	Such a good app as it makes my chores and work fun. I have used this app for about 7 months and I have loved it ever since.	5	0		2021-12-29 04:17:05	Thanks so much for your review. We're happy to hear Habitica has been helpful for you during the months you've used it! If you’d like to share any feedback with us in the future, you can do that via Menu - About - Support - Send Feedback.	2021-12-31 17:38:32
376	e2359209-33b7-44d5-b92f-1335bc60c689	Jermia Wicaksono	https://play-lh.googleusercontent.com/a-/AFdZucpFefQ4n0m6pAs9zkol5VMIqSEqR2JDRkOe4N1IJ-E	bagus untuk habits, jadwal harian dan to do list jadi lebih produktif	5	0	3.4.1.1	2021-12-28 12:01:20	Hi, Jermia! Thanks so much for your review. We're happy to hear Habitica has been helpful for you in staying on top of your lists and being productive! If you’d like to share any feedback with us directly, you can do that via Menu - About - Support - Send Feedback.	2021-12-31 17:39:25
377	3d215a55-9806-48c2-9bab-f111a2700b6c	Jade Omega	https://play-lh.googleusercontent.com/a-/AFdZucq9S0yaPnLUQwGMilbiXUTps5ywFcLgUq8TgzQW1A	Yesss goooddd app for life	5	0	3.4.1.1	2021-12-28 05:48:06	Hi, Jade! Thanks so much for your review. We're happy to hear Habitica has been helpful for you! If you’d like to share any feedback with us directly, you can do that via Menu - About - Support - Send Feedback.	2021-12-31 17:41:48
378	f89f1c43-d70e-4cb2-b121-5a90e30bc466	Artsy Minx	https://play-lh.googleusercontent.com/a-/AFdZucozkTa32ntOM68VH5ZA5HLmuWfM4S6Q9S6M4F0KgQ	This is an incredible app and I recommend it to anyone who has a compatitive streak and/or loves rpg games! It helps me a ton and it got me and my partner closer. 💯 recommend!	5	0	3.4.1.1	2021-12-24 20:19:13	Thanks so much for your review and recommendation. We're happy to hear Habitica has been helpful and enjoyable for you and your partner! If you’d like to share any feedback with us directly, you can do that via Menu - About - Support - Send Feedback. Happy adventuring!	2021-12-27 23:28:09
379	1ac6ac9e-0293-48d0-8a63-f2a914bb86c4	Alex Sessions	https://play-lh.googleusercontent.com/a-/AFdZucpS1P6N6xOm3MZ-wm7GTa323oGRTSmsvGXyts3mbw	I love this app so much	5	0	3.4.1.1	2021-12-23 23:58:36	Thanks so much for your review. We're happy to hear you love Habitica! If you’d like to share any feedback with us in the future, you can do that via Menu - About - Support - Send Feedback.	2021-12-24 16:31:52
380	aad07904-ced9-4748-a74c-a093a2b370a7	Nesslin McDonald	https://play-lh.googleusercontent.com/a-/AFdZucpNcC22tlcCIz-B3Lti1RbSEOKrcloNvfovh2Yt	I always quit doing my tasks but I always re-install	4	0		2021-12-23 05:15:14	Thank you for your review. We're happy to hear Habitica helps you and that you come back to it repeatedly! If you’d like to share any thoughts with us directly in the future, you can do that via Menu - About - Support - Send Feedback.	2021-12-24 16:36:44
381	4b2d0676-3cb5-48ce-a558-4072ea8f0518	IceOfPhoenix88	https://play-lh.googleusercontent.com/a-/AFdZucor8M19unEYujU-pyImBW7eoswTfq143kFJmoPCyg	Excellent incorporation of a to do list into a game!	5	0	3.4.1.1	2021-12-22 23:01:23	Thanks so much for your review. We're happy to hear Habitica's gamification has been helpful for you! If you’d like to share any feedback with us directly, you can do that via Menu - About - Support - Send Feedback.	2021-12-24 16:38:41
382	1088fb0e-fe14-4324-99f2-1c7c48e3d2b1	Hannah Dirks	https://play-lh.googleusercontent.com/a/AItbvml5U1qHcdsSErpgQ-EJusCAsynenJvLXTHfvKNn=mo	I've been having a hard time just getting things done, but this app makes it way easier to find motivation. Honestly got me through finals week 😂	5	0		2021-12-22 21:33:48	Hi, Hannah! Thanks so much for your review and rating. We're happy to hear Habitica has been helpful for you in getting things done. Hope your finals went well! If you’d like to share any feedback with us directly, you can do that via Menu - About - Support - Send Feedback.	2021-12-24 16:39:22
383	8395f3a5-6a74-4747-a430-a89312b07cc5	Jose Sales	https://play-lh.googleusercontent.com/a-/AFdZucqKfTZRDdXSrqyONYYAU0CYCUeovvtcUxiZne5LHQ	Life changing app, thank you very much for the amazing work.	5	0	3.4.1.1	2021-12-21 21:08:42	Thanks so much for using Habitica and leaving a review. We're glad to hear that Habitica is helping you accomplish your everyday tasks. If you’d like to share any feedback with us directly, you can do that via Menu - About - Support - Send Feedback.	2021-12-24 16:41:19
384	6cf67c3b-e7ba-47eb-a1ce-487af4491a6d	Mikael Tofteby	https://play-lh.googleusercontent.com/a-/AFdZucp3qg2F0y---PILwvPFxzx_xTXu-uUB6DAW9xB7CQ	Used for couple of days. Seems nice but very connected to the world outside. Doing your own things and bosses seems limited. Bit tough to start	3	0	3.4.1.1	2021-12-18 09:12:14	Hi Mikael! We'll keep your feedback in mind as we continue to work to improve Habitica. You can contact us directly by going to Menu - About - Support - Send Feedback if you'd like to give us additional details. We hope you will enjoy continuing to build out your task lists and customizing them to fit your needs.	2021-12-19 13:24:17
385	83d4a5b2-1e96-43c0-8e3b-0a74468906a9	Safri Riyan	https://play-lh.googleusercontent.com/a-/AFdZucreMrWrGtq2pZh8zW2lm42IVjdaOW4XCQjDBITc	It's good app to control your task. I'm feeling like playing a game IRL. But sometimes notification not pop up, it's should be fix. Overall I like this app so much	4	7	3.4.1.1	2021-12-18 03:26:19	Hi! We're glad you're finding Habitica to be so useful in staying on top of your tasks. If you'd like to let us know more about what notification issues you're experiencing, you can do so via Menu - About - Support - Report a Bug. A direct report will provide details that will help the team fix the issue.	2021-12-19 13:26:28
386	683aee54-0fb7-4655-af89-613d63476e05	Megha Ha	https://play-lh.googleusercontent.com/a-/AFdZucrNfp5U6nZy1Ol67m3cLC_1_BN_ptPZvs8Z6g2MWwU	App itself is good. But I don't see option for reviewing my progress report of the habits. There is no calendar view, nor there is option for exporting the statistics or progress report. These are important for habit formation.	2	14	3.4.1.1	2021-12-16 03:54:45	Hi, Megha! Thank you for your review! We're working on calendars, stats, and graphs right now and hope to add them very soon. You might find these two resources helpful in the meantime: https://habitica.fandom.com/wiki/Strategitica and https://oldgods.net/habitrpg/habitrpg_user_data_display.html	2021-12-19 13:50:58
387	d12dd3db-f9e8-4d7e-a0c7-c70dfd874a0a	Emily	https://play-lh.googleusercontent.com/a-/AFdZucrkAV7CGBuOIfpqTDgRF2GjGrmwG7hupJZngZNNrQ	I've had it for about two weeks now and it's really helped me stay on top of everything	5	0	3.4.1.1	2021-12-15 20:50:06	Hi, Emily! Thanks so much for your review. We're happy to hear Habitica has been helpful for you in staying on top of your tasks! If you’d like to share any feedback with us directly, you can do that via Menu - About - Support - Send Feedback.	2021-12-19 13:53:36
388	1a2d1f21-7bc2-4074-9711-072c7c56a876	Arlin Akins	https://play-lh.googleusercontent.com/a-/AFdZucqwzsssoC6XjexuJcagVLOAwmDz6-Fdn5ZjsKiz5A	Very supportive effects	5	0	3.4.1.1	2021-12-15 20:04:54	Hi, Arlin! Thank you for your review. We're happy to hear Habitica has helped support you! If you’d like to share any feedback with us directly, you can do that via Menu - About - Support - Send Feedback.	2021-12-19 13:54:03
389	b1afe9cd-515e-4157-8694-abf7d8450e2d	Festum Qin	https://play-lh.googleusercontent.com/a-/AFdZucq3k57Us8IxFp2PowGPgAz0P9vJppmNb6j9e9Y_HAg	Useless	1	0		2021-12-15 00:46:40	Hi! Thanks for giving Habitica a try. We're sorry we couldn't meet your needs. If you’d like to share any feedback about your experience with us directly, you can do that via Menu - About - Support - Send Feedback.	2021-12-19 13:56:25
390	0858df13-3137-46ee-bbf5-589e55cca46f	Mohamed Barrous	https://play-lh.googleusercontent.com/a-/AFdZucoj76Q969pLpuB5SLaQBU3bOHscsNTDHrLzF1uJMg	The final star is just for timing task. It would be so awesome if you make a new type of tasks where there is a timer and for every minute, coins are added to the wallet.	4	0	3.4.1.1	2021-12-14 21:59:41	Hi, Mohamed! Thanks for your review and feedback! We now have an official suggestion and comment form to help us keep track of what features users want the most. You can find it via Menu - About - Send Feedback if you’d like to add your ideas about integrating timers.	2021-12-19 13:56:59
391	7ab22019-ce7d-404c-8a02-3f3deb76c67d	Richard Ryan	https://play-lh.googleusercontent.com/a-/AFdZucoNZ_s16pEGfBSdJFXgLERVaA_gRA0Aq96sV3zXTA	A fun twist on your list of chores.	4	0	3.4.1.1	2021-12-14 13:25:05	Hi, Richard! Thanks so much for your review. We're happy to hear Habitica has been helpful for you! If you’d like to share any feedback with us directly, you can do that via Menu - About - Support - Send Feedback.	2021-12-19 13:57:24
392	2fed275e-aa0b-4ef9-9171-b28c112f3784	Amanda Martin	https://play-lh.googleusercontent.com/a-/AFdZucri28FmpkXXd0HQRGVjqP1wDqeCsAIPgwkAMb7moQ	It's good but I am having a checkmark problem, every time I press the checklist box it won't do anything.	4	0		2021-12-13 22:53:35	Hi, Amanda! Thank you for your rating and feedback. But we're sorry to hear about this issue with checkmark boxes. Please let us know if you're still having trouble via Menu - About - Support- Report a Bug and the team will look into	2021-12-19 13:36:45
393	87930dfd-6ee6-405a-af0e-95cd0dba75d5	drew roleberg	https://play-lh.googleusercontent.com/a/AItbvmkV_JhWGykWQqB9A4D6BaAjcTtz8K7fw3xw3ord=mo	Really cool lots of options wish there was a goal tab tho	4	0		2021-12-13 22:16:16	Hi, Drew! Thanks for using Habitica; we're glad you're finding it to be useful. You can add goals to your To Do list and break them down into smaller subtasks as well, if they are complex goals.You can find our suggestion form via Menu - About - Send Feedback if you’d like to add any ideas.	2021-12-19 13:39:40
394	0efd3064-34de-477a-8e14-cb60a3989bcf	Charles Lanier	https://play-lh.googleusercontent.com/a-/AFdZucoXLJ-uscWYWf8v_o7koOOBP8BWfKeTejeTlw8x	This apps cool.	4	0	3.4.1.1	2021-12-13 05:28:52	Thanks so much for your review. We're happy to hear you are enjoying Habitica and think it's cool! If you’d like to share any feedback with us directly, you can do that via Menu - About - Support - Send Feedback.	2021-12-19 13:42:33
395	ae0b5a4b-ad4a-4c70-9a94-ca6ee5ad5b07	Sultan Sallaj	https://play-lh.googleusercontent.com/a/AItbvmlGIrBTF7T7gAiZxU0BEqqyZUo-8MbF5jFnQaoD=mo	Need better timer options. Would like to set a time of how long something needs to be done. Also, reminders on the tasks need to have a comment/note section to describe the reminder.	3	1	3.4.1.1	2021-12-13 01:08:58	Hi! Thanks for your review and feedback! We now have an official suggestion and comment form to help us keep track of what features users want the most. You can find it via Menu - About - Send Feedback if you’d like to add your ideas.	2021-12-19 13:43:36
396	eb199842-cc10-4596-8988-2014b5201366	Rayen	https://play-lh.googleusercontent.com/a-/AFdZucro9_rNQzpv0DtoSypSloi0D6xspq-jj_WGNlEdsQ	Item and character doesn't appear.	2	0	3.4.1.1	2021-12-12 12:43:26	Hi, Rayen! sorry to hear you're having an issue with your avatar. You may find the resources at Menu - About - Help and FAQ helpful. Please let us know if you're still having trouble via Menu - About - Support- Report a Bug and the team will look into it.	2021-12-19 13:47:03
397	b15f3a81-c0e6-4451-bf98-88629ab69dc7	Azar İbrahimli	https://play-lh.googleusercontent.com/a-/AFdZucpXu5iv1MBZqipotytVeLgAcVehoHfdQvt8zYUH	This app is just what the doctor ordered. I believe if people use it properly, they can make their life more productive and joyful. Thank you and good luck!	5	0	3.4.1.1	2021-12-12 09:42:54	Thanks for your review, rating, and kind words. They mean a lot to us! We're happy to hear Habitica has been useful and fun for you. If you'd like to share any further feedback, please feel free to reach out via Menu - About - Support - Send Feedback.	2021-12-19 13:47:50
398	64c202bf-fee8-4c9d-bc6c-b0e79650633f	Nathan Mark	https://play-lh.googleusercontent.com/a-/AFdZucpCjzCAy2hflwW_60jkpDBWE8Udi_ur7IKj9mMrtg	All right, all great but maybe add something like notebook sounds good. Think about it, because it would be good idea. All included except for notes... Oh & more - please add more informative greeting.	5	3	3.4.1.1	2021-12-10 19:15:49	Thanks for your review and feedback! We now have an official suggestion and comment form to help us keep track of what features users want the most. You can find it via Menu - About - Send Feedback if you’d like to add these ideas.	2021-12-11 16:44:17
399	b20674d1-8fed-4513-b43d-e765c5ddd37e	Micrart	https://play-lh.googleusercontent.com/a-/AFdZucq4nEzVKWDldQnj4-YlqkN-2cr9N4sDINiDRtnL0A	I instantly fell in love with the app! Great one! I invited my brother and two other friends to team up and level up 😄 To a healthier life! 😁😁😁	5	1	3.4.1.1	2021-12-10 17:41:44	Thanks so much for your review and for recommending Habitica to your friends and family. We're happy to hear how much you love Habitica. If you’d like to share any feedback with us directly in the future, you can do that via Menu - About - Support - Send Feedback. Happy adventuring!	2021-12-11 16:43:39
400	059be66f-d392-4fac-9c58-74c9da46beab	Len Schmidt	https://play-lh.googleusercontent.com/a-/AFdZucpXDyGF8wPyKIrO_k9FocT6HknWOeAGmMsOYWMe1LI	I love this app, I've used it everyday for about 4 years now. It's amazing and I cannot emphasize just how awesome this app is.	5	0	3.4.1.1	2021-12-10 17:41:01	Hi, Len! Thanks so much for your review and for being a long-time Habitican! We're happy to hear how much you enjoy using Habitica. If you’d like to share any feedback with us directly in the future, you can do that via Menu - About - Support - Send Feedback. Happy adventuring!	2021-12-11 16:42:47
401	a2627897-1e1f-413e-a499-0f0d5287f232	flower child	https://play-lh.googleusercontent.com/a/AItbvmkFa6YTQlXsUKLKzD-2Fg3Z-Gs3KGaGn1ZVVns_=mo	I love this app so much!! it helps me remember what I have to do and actually do them. the rewards when I do good give me a much needed dopamine boost, great for hacking my ADHD since we THRIVE on dopamine. I've also started building good habits with it! and the social and game aspects are a really great part of it. highly recommend to anyone struggling with ADHD or mental health :]	5	149	3.4.1.1	2021-12-09 17:40:10	Thanks so much for your review and rating. And thank you for recommending Habitica! We're happy to hear it has been fun and helpful for you in staying on top of tasks and building good habits! If you’d like to share any additional feedback with us directly, you can do that via Menu - About - Support - Send Feedback.	2021-12-11 16:39:52
402	ecfa8c6c-f136-48a6-88c8-88cc6ddb79e6	Jeena Joan	https://play-lh.googleusercontent.com/a-/AFdZucqUOD7Js5Tz9H7XYRJ8YLzoV992EGapjPiUxyHRrQ	I love the app. Have been using it for a few days and was able to be 100% more productive. I recommend it to my friends...especially those with ADHD.	5	0	3.4.1.1	2021-12-09 15:16:58	Hi, Jeena! Thanks so much for your review and for recommending Habitica to your friends. We're happy to hear it has helped you be more productive! If you’d like to share any feedback with us directly, you can do that via Menu - About - Support - Send Feedback.	2021-12-11 16:37:41
403	eea3a86f-d3e3-47a0-bc66-acc48203b843	Edward M.	https://play-lh.googleusercontent.com/a/AItbvmmzlWBOPQ-bzcg-KeSvFDuZ223-IBWAVvRj5Fkw=mo	Privacy nightmare.	1	1		2021-12-09 13:21:04	Hi, Edward. We're sorry you have concerns about using Habitica. Our privacy policy is posted here: https://habitica.com/static/privacy If you have questions for us regarding your data, please don't hesitate to connect with us at admin@habitica.com.	2021-12-11 16:36:29
404	bb079550-dcaa-474b-863b-9b5412e280cb	Ashley Yost	https://play-lh.googleusercontent.com/a-/AFdZucrl1PRxpLnUPXXq4-l41xS__ouznedd4kmDUb4iDg	I love this! Defeating Quest Monsters with my Party helps me look forward to checking things off my list. What I used to gripe about, I now do with less resistance, because this app helps me view life as a game. The themed chat groups are super supportive. There's a community to suit any style, and a variety of challenges to take part in on top of what you set for yourself. You can select the due…	5	1	3.2.3	2021-12-09 05:08:36	Ashley, thanks for your detailed review and kind words; they mean a lot to us! We're happy to hear Habitica has been so useful for you! If you’d like to share any feedback with us directly, you can do that via Menu - About - Support - Send Feedback. Happy adventuring!	2021-12-11 16:30:35
405	bc3616f3-6604-4f70-83b4-8116179d2cde	Haden Prell	https://play-lh.googleusercontent.com/a-/AFdZucq1Z-NcTq0kD2wkgyifwbdC1G8uS9AH4yyz3kU1	Decent app, a lot of it is pay to play but I don't really care about the quests and guilds. The app is still a great way to manage my executive dysfunction and get me to track daily habits I forget or don't have motivation to do. Originally left a 3 star critical review for being una me to log into my old account on a new phone because I didn't know how else to contact the developer and got a res…	4	14	3.4.1.1	2021-12-06 18:23:59	Hi Haden! Thank you for the rating and for being a Habitica user. Facebook login is disabled, but if you contact us at admin@habitica.com we can provide you with a new login to your existing account so you won't lose any of your tasks or progress. Happy adventuring!	2021-12-06 13:07:45
406	0d15fe5f-b45a-408a-b1f3-fdff89f5906d	Aa Zz	https://play-lh.googleusercontent.com/a/AItbvmmF8Ru_GHozZ2Nk__pm_kV_-3_hu7XqKsL1nHBU=mo	Great app for anyone seeking to build habits/track to dos! I needed an app to contain all my dailies and one time to do's. All apps I used made me do a lot of changes in the settings to do the reminders, formatting, tags, etc. This app does all the organizing for you! They already have a tab for dailies, one time to do tasks and habits you want to stop/continue 🤩 flexibility but no frills. So eas…	5	7	3.4.1.1	2021-12-06 04:57:57	Thanks for your detailed review and rating. We're so happy to hear Habitica has been helpful for you! If you’d like to share any feedback with us directly, you can do that via Menu - About - Support - Send Feedback.	2021-12-06 13:14:45
407	396dc6dd-c3e3-488d-a6a1-fa6a0d7a097f	Kyle Polo	https://play-lh.googleusercontent.com/a-/AFdZucqit6X-xTt1yYPZ1cs0kFKLC8SSMli54LBuJ73AwHA	I want to like it. This app on the surface is pretty nice, the functionality is solid and it's made well... but then you hit the pay wall. Most of the game is locked behind Gems to buy items and quests in games; I don't even have a problem with the items behind the pay wall, but the quests, and other things, that's a step too far. Theoretically you can earn gems, but you've got to do challenges, …	3	76	3.4.1.1	2021-12-04 19:07:42	Hi, Kyle! Thanks so much for your review. We're glad you're enjoying Habitica. We'd suggest joining a party to team up with others if you want to go on more quests and don't have enough gems on your own. If you’d like to share any feedback with us directly, you can do that via Menu - About - Support - Send Feedback.	2021-12-06 13:18:13
408	bf54b38d-a2c8-4b34-8ee3-054bd355cdd9	Chad Crouse	https://play-lh.googleusercontent.com/a/AItbvmmJfiy76c_lIL4pB_kEpDW0djpwUr0ZkaeHuBM_=mo	This app was GREAT! Until it stopped recognizing time. Dailies do not reset like they should reliably and there is ZERO ways to force the app to recognize it forgot to reset the day. Do not use this app if you are looking to improve you life, at least not until they can ensure the app recognizes something as simple as a DAY CHANGE.	1	10	3.4.1.1	2021-12-03 15:16:44	Hi, Chad! If you’re still having this issue, we’d love to take a look. You can send a direct report via Menu - About - Support - Report a Bug	2021-12-06 13:24:04
409	96926685-3fed-4807-a010-e8a06b27c1a0	Ashas Bukhari	https://play-lh.googleusercontent.com/a-/AFdZucrMYZOPdXsuUgSoUWndRk8TxGpRTtDFcWRw_Qp-5qE	So, this app is absolutely awesome. I just love it, and it's really given me the motivation to get myself organised and hold myself accountable. I just wish it had an offline mode so we could sync our stats when online, and also a progress chart, so we can easily see how we've been progressing. I love this app and this is the ONLY app I'm seriously considering money on.	5	15	3.4.1.1	2021-12-02 06:23:10	Thanks so much for your review and support. We're happy to hear Habitica has been helpful and motivating for you! We plan to add offline mode in the future. In the meantime, if you’d like to let us know what features you’d use the most offline, you can do so via Menu - About - Support - Send Feedback.	2021-12-06 13:27:53
410	c5548d80-edcb-45d2-aeb3-4054fe342031	Rob C.	https://play-lh.googleusercontent.com/a-/AFdZucpvVqo33yejc9NpheVCCs8wibJYa96Vyh6C5M-biQ	It's a decent task manager! The biggest downside is that I find the graphics - specifically the characters - very unappealing. So there's little to no incentive for me to buy anything for my character. And an issue I keep facing is that some things can't be done via the mobile app and I'm told to visit the homepage. And truthfully, the homepage works a whole lot better and seems to have gotten th…	3	4	3.4.1.1	2021-12-01 17:49:56	Hi, Rob! Thank you for your feedback. We hope to have complete feature parity for all platforms as soon as possible! In the meantime, you can send a bug report via Menu - About - Support - Report a Bug. Our pixel artwork is done by volunteers from our community and is intended to evoke a retro style. Sorry it's not your cup of tea!	2021-12-01 19:09:33
411	2bd5bd34-15fb-41d5-9d08-1e724eaa076c	Ильнур Шакиров	https://play-lh.googleusercontent.com/a-/AFdZucrK6lunZi22TedVf65pquluRETLt-sJcY2hXXmquA	Классное приложение по внедрению привычек	5	0		2021-12-01 07:53:40	Thanks so much for your review. We're happy to hear you think Habitica is cool! If you’d like to share any feedback with us directly, you can do that via Menu - About - Support - Send Feedback.	2021-12-01 19:10:19
412	eef58a97-1603-47bd-a184-75eac23e0f8a	ユミレイ	https://play-lh.googleusercontent.com/a-/AFdZucqxSWq-bzOtLEz0dyc5Tefluwjxp8RYB9-a5gd8aA	Not bad useful tool.	4	0	3.4.1	2021-11-30 11:22:25	Thanks so much for your review. We're happy to hear Habitica has been helpful for you! If you’d like to share any feedback with us directly, you can do that via Menu - About - Support - Send Feedback.	2021-12-01 19:10:26
413	14b0ea07-062e-46d9-b324-4f6f1736a70c	Zak Kloes	https://play-lh.googleusercontent.com/a-/AFdZucoPYjWGx85_zgkCyNOVCf0BLHoqLtkr2KGEikGDe9w	This app works miracles especially for folks with executive dysfunction.	5	0	3.1	2021-11-30 10:32:41	Thanks so much for your review. It means a lot to us to know Habitica has been useful for you! If you’d like to share any feedback with us directly in the future, you can do that via Menu - About - Support - Send Feedback.	2021-12-01 19:11:01
414	858f9750-a5ee-4fcd-858f-8f0d6e8eebde	Seren De Leon	https://play-lh.googleusercontent.com/a-/AFdZucqr3B1-ufhA98Sh_aLMAUOodkE9kPpA33ukISdV-Q	While decent to keep motivated, you can't really make amy progress with items as you can't select or change your class! It says you can in tbe settings but no matter how many times I check or reload, nothing is there or under any option there.	3	2	3.4.1.1	2021-11-30 04:59:51	Thanks so much for your review. We're happy to hear Habitica has been motivating for you! You can change your class once you reach level 10 and, after that, you can change your class by spending 3 gems or using the Orb of Rebirth once you reach level 50. You can learn more here: https://habitica.fandom.com/wiki/Class_System Hope this helps!	2021-12-01 19:23:59
415	fd94c256-d304-4a2a-bd00-cb7236bb4976	Joe Toomey	https://play-lh.googleusercontent.com/a-/AFdZucqiK9dBjcyKEbDtaaG-R-Hwd9sbPSn9Sk4oLhnJ	Did like this at one point but for whatever reason I seemed to prefer just doing a normal checklist these days.	3	6	1.3.3	2021-11-30 04:15:35	Hi Joe! That's valid. We're glad you gave Habitica a try and hope you'll return whenever you want or need to add gamification back to your productivity again.	2021-12-01 19:25:30
416	4df0c4bc-b7bb-49a7-9b7c-f81077ec2c39	Arwa	https://play-lh.googleusercontent.com/a-/AFdZucrb7ulnHW3h1sJ4HQqPyww-vUpHx-zbt9VDX5E2xU8	Amazing app especially for adhd-ers like me. Highly recommend to everyone!	5	0	3.4.0.2	2021-11-29 03:32:40	Thanks so much for your kind words; they mean a lot to us. We're happy to hear Habitica has been helpful for you! If you’d like to share any feedback with us directly, you can do that via Menu - About - Support - Send Feedback.	2021-12-01 19:26:11
417	3e9e2ac4-3cb5-4909-9c03-50dbba078bb8	Markus Louis Mühlberg	https://play-lh.googleusercontent.com/a/AItbvmmRVtRTSk6B9iyCF4wQEAhV5p7BFDTExO_yI2qpTA=mo	Habitica allows for a system of habbits that have really changed my productivity game (pun intended). Fun, user friendly and flexible enough for pretty much everything you can think of. Highly recommend everyone try it out!	5	0	3.4.1.1	2021-11-28 15:10:40	Thanks so much for your review and recommendation. We're happy to hear Habitica has been fun for you and helps you be productive! If you’d like to share any feedback with us directly, you can do that via Menu - About - Support - Send Feedback.	2021-12-01 19:30:00
418	2b612f31-8c84-4207-865f-3ba75888cf45	Aisyah Adinda	https://play-lh.googleusercontent.com/a-/AFdZucobCytCOTP_xygs9qfeeH_TFJmV_4phUj0bUgzqPA	Hands down, Habitica is the best habit app I've ever tried. It makes doing mundane tasks exciting. I love the monthly events, and the community plus the party system. Sure there are things that can be improved. I wish we could keep the history of our checked to do lists. And I also wish there is a search feature in the equipment section. But overall, the good definitely far outweighs the bad, and…	5	12	3.2.3	2021-11-27 16:25:13	Thanks so much for your review and rating. We're happy to hear Habitica has been fun and useful for you! We now have an official suggestion and comment form to help us keep track of what features users want the most. You can find it via Menu - About - Send Feedback if you’d like to add these ideas.	2021-12-01 19:30:50
419	54687979-37fb-41db-9f17-7569a5707dd2	Haziq Faiz	https://play-lh.googleusercontent.com/a-/AFdZucqzgwxugQW8dvhZ8WDsrlLDgpxW2Pqe2yKxLHzKJg	love it...but i do want to add someting 1) Customize the widgets 2) Add different stances with the pets and mounts especially when entering the tavern (like sleeping) yep thats all...again this app is superb really helps diligently do my good habits and throw out the bad habits.. i mean thats the main reason i download this app and i think others felt the same way	5	2	3.4.1.1	2021-11-26 22:10:19	Thanks so much for your review. We're happy to hear Habitica has been helpful for you! We now have an official suggestion and comment form to help us keep track of what features users want the most. You can find it via Menu - About - Send Feedback if you’d like to add your ideas.	2021-12-01 19:33:42
420	8fb3ff93-e259-4914-b7aa-9fbdafec0d46	APOPHISCA	https://play-lh.googleusercontent.com/a-/AFdZucr2k2wOdzyvIY60WxP1SkAxReVw4rbE8WgNTDPx9g	Just installed the app... And I'm already seeing result... Generally I'm the very lazy type of dude, I hardly get things done. I hate doing the normal everyday boring repetitive but yet NECESSARY task.... And as a gamer, the sheer fact this app gamify those task... Just made the entire process a lot less boring for my lazy a$$............. And honestly... HabitRPG Inc.... You guys ROCK!. I defini…	5	0	3.4.1.1	2021-11-26 20:37:56	Thanks so much for your review and recommendation. We're happy to hear Habitica has been helpful for you in staying productive and battling boring life tasks! If you’d like to share any feedback with us directly, you can do that via Menu - About - Support - Send Feedback.	2021-12-01 19:38:03
421	8ed9cf23-ed55-41b1-8a80-d3994651a844	Shalamar Fox	https://play-lh.googleusercontent.com/a/AItbvmmK9xCv5d4MNxOiF1lum4B8dftSeitMBFykNZIi=mo	Very confusing interface...would highly suggest doing the computer version before trying the condensed app. Way more clear if you have tried things like trello.	3	1		2021-11-26 07:09:43	Hi! Sorry to hear you had trouble navigating Habitica! You may find the resources at Menu - About - Help and FAQ helpful.	2021-12-01 19:38:52
422	92736683-55a4-40c8-9f8d-8e37b9f2d859	Abdul Jalal	https://play-lh.googleusercontent.com/a-/AFdZucr2aoMLnte32xD3zE3pRQevu1Tyfp1arP0aPRNNyQ	Ok Im just downloading the app. I will re-review after 2 weeks, hopefully I find this app helpful.	5	0	3.4.1.1	2021-11-25 17:53:58	Thanks for your review. We hope you will find Habitica to be useful as you continue to use it! If you’d like to share any feedback with us directly in the future, you can do that via Menu - About - Support - Send Feedback.	2021-12-01 19:40:22
423	bccfa2c4-c31c-40e9-8217-84689ee09a48	BusiBee	https://play-lh.googleusercontent.com/a-/AFdZucr7bfQ725nUsSwcB9Mml2J-Aol0AhaqS-RtS56cFA	Good app.	5	0	3.4.1.1	2021-11-25 05:18:48	Thanks so much for your review and rating. If you’d like to share any feedback with us directly, you can do that via Menu - About - Support - Send Feedback.	2021-12-01 19:46:35
424	aed000b0-6b49-4089-8dec-126496602d89	Larissa Lopes	https://play-lh.googleusercontent.com/a/AItbvml9OF5FSIG7SLX2YPLbirobiY5P2ZKATm5x0IfNow=mo	I really love this app, but since yesterday the website isn't working, could you fix this please 🥺	5	0	3.4.1.1	2021-11-24 10:31:05	Hi, Larissa! Sorry for the outage. Habitica is up and running again! We hope that you continue to find it useful and enjoyable in the future. If you’d like to share any feedback with us directly, you can do that via Menu - About - Support - Send Feedback.	2021-12-01 19:54:31
425	83bac10c-5592-4dbb-a218-08c33f0cfefc	Amrit Nalam	https://play-lh.googleusercontent.com/a/AItbvmnqudr1ig9s88CyaD1EL_96GeV397E3ElO4s7zU=mo	This is the ideal app for people like me. Very unique concept of reward and punishment to get us to do stuff. I'll buy a subscription to support the developers once I use it for a few more months. Just one suggestion, it's costlier to pay the same value in Rupees than in Dollars. So can you adjust that?	5	33	3.4.1.1	2021-11-24 05:15:23	Hi Amrit! Thank you for your review and rating. We hope you continue to enjoy your adventure with Habitica! Google Play handles all payments related to in-app purchases and subscriptions, so exchange rates are not something we can control.	2021-12-01 19:58:02
426	21b8325f-e4d9-446e-b0af-6ca150fb3973	Emma B.	https://play-lh.googleusercontent.com/a-/AFdZucrl3e7LhkdnLixw95AIDSU_WN-WO6P7qcXRx_CJ	great app! personally i use it as a checklist of bodily needs for my executive dysfunction. i'd like someplace in the app to take notes. for example, which foods for what pets or the maximum amounts i can boost each stat using equipment i have. if you have a habit to do something fun, you can write down what it was. looking back on previous entries might help you see what new tasks need to be mad…	5	13	3.4.1.1	2021-11-24 04:59:00	Hi Emma! We now have an official suggestion and comment form to help us keep track of what features users want the most. You can find it via Menu - About - Send Feedback if you’d like to add your ideas about a notes section.	2021-12-01 19:58:59
427	a41418d7-88d5-4282-bf01-5d612e884044	Nicole EKM	https://play-lh.googleusercontent.com/a-/AFdZucqwqUIlySQ82K_ft5lRu3gVe7r_K9kXBfLZ4s-OFxk	very fun	5	0	3.4.1.1	2021-11-23 23:31:34	Hi, Nicole! Thanks so much for your review. We're happy to hear Habitica has been fun for you! If you’d like to share any feedback with us directly, you can do that via Menu - About - Support - Send Feedback.	2021-12-01 20:00:50
428	32649d03-ec83-48de-b20f-44cff884d149	שקד איל	https://play-lh.googleusercontent.com/a/AItbvml5tGDTp4jk88wGXCSpe5KvWaD-rYYi92sqUW4A=mo	It is a great conceot, but when the dailies don't refresh every day, it kinda ruin the game Edit: I have tried the developer suggestion, but the issue still occurs, so sadly I will uninstall this	2	1	3.4.1.1	2021-11-23 17:22:40	Sorry to hear about this issue with refreshing. Try pulling down on one of your task list screens. If that does not help, try going to Menu - Settings - Reload Content. If you’re still having issues, we’d love to take a look - you can send a direct report via Menu - About - Support - Report a Bug	2021-11-15 01:27:35
429	00f7d43e-e1d5-4488-8b94-75df878a9cb3	Isabelle	https://play-lh.googleusercontent.com/a-/AFdZucq-XuFHACZ_7px84cj0BJuvxyQqqohEEeJnXyaC59Q	I have a problem with the stats widgets, it used to work but no longer. It displays no hp mana or xp. I only see the Habitica purple icon.	4	0	3.4.1.1	2021-11-23 03:06:34	Hi, Isabelle! Sorry to hear about this issue with the widgets. Our team of developers is working on it. Feel free to submit a bug report to provide details that will help our team fix the issue via Menu - About - Support - Report a Bug.	2021-12-01 20:03:12
430	e6487ec4-6a56-4310-92ee-07b855a520e9	An We	https://play-lh.googleusercontent.com/a/AItbvmnZ12tg6t977ZMs6JAwWD7hrPuBJ1_AJvu4Od1u=mo	Love this app!! Definitely recommend it for anyone! I'd love if you added an optional delay for the beginning of the day - I tend to do a lot of things in the evening which may be after midnight...	5	3	3.4.1.1	2021-11-22 17:40:00	Thanks so much for your review. We're happy to hear you recommend Habitica to others! In your settings, you should be able to enter a custom time for your day to start. So if you frequently finish some things after midnight, you could set your day to start at 1am or 5am instead of midnight. Hope that helps!	2021-11-22 23:42:17
431	651b9ef3-6f78-4cdc-8135-5dcaef3472c2	Ian Tripp	https://play-lh.googleusercontent.com/a-/AFdZucptYohOKmGZ0Tl9H0rCtX3PRm8xGOBLB7TuKEAmDQ4	Good motivator, gameplay is not straight forward or beginner friendly. I appreciate the dailies and to do lists and the stats give a good indication of how you are doing. Could not figure out how to get a quest going, or do any type of freeplay. Just enough to level up my character.	3	17	3.4.1.1	2021-11-22 05:49:47	Thanks for your review. Sorry to hear you’re having trouble starting a quest. You may find the resources at Menu - About - Help and FAQ helpful. You can also check the wiki article on quests: https://habitica.fandom.com/wiki/Quests	2021-11-22 23:45:43
432	8443cbc4-0cb9-4ae0-81aa-3f93d09c13ee	Myrna Scott	https://play-lh.googleusercontent.com/a-/AFdZucocSjQX4w5-x40Ty0ngnOP4T4og2bb08BSN9idc	I really liked this app in the beginning but I don't want to group up with people for quests. It was a great app for keeping track of goals, tasks and long term goals but it was super discouraging to keep getting demoted and losing currency. I wish there was a version that would let me freeze xp so that I can use the app without having to group with other people	2	53	3.4.1.1	2021-11-21 01:59:17	Hi Myrna! Thanks for your review and feedback! We now have an official suggestion and comment form to help us keep track of what users want the most. You can find it via Menu - About - Send Feedback if you’d like to add your ideas.	2021-11-22 23:53:16
433	c02b3304-f88a-41be-9c17-d21a6e258132	steals peach	https://play-lh.googleusercontent.com/a-/AFdZucoSsss727iYtDO-S-zyG0paxtW5fjPpOjXYkxjOSQ	Played five years	5	0	3.4.1.1	2021-11-21 01:15:54	Thanks so much for your review and rating. We're happy to hear Habitica has been helpful for you for five years! If you’d like to share any feedback with us directly, you can do that via Menu - About - Support - Send Feedback.	2021-11-22 23:53:57
434	1f2de793-7f36-4cb0-a4bf-a535861b2b7c	Tim Mesa	https://play-lh.googleusercontent.com/a-/AFdZucoGFwft03BKeiVh-hOK9KGhEmVd9XfGGYYuExVY	Great app , love the concept, the fact that it's free makes it even better, however I think the design could be improved,and I would like if habit widgets somehow indicated that the task was completed , it would give a sense of accomplishment to the user , right now widgets are very bad and uncomfortable to use	3	2	3.4.1.1	2021-11-20 21:20:44	Hi, Tim! Thanks for your review and feedback. We now have an official suggestion and comment form to help us keep track of what features users want the most. You can find it via Menu - About - Send Feedback if you’d like to add your ideas about design and widget improvements.	2021-11-22 23:55:23
435	c44cb66c-32ea-4841-b6dc-6720edeeee34	A Google user	https://play-lh.googleusercontent.com/EGemoI2NTXmTsBVtJqk8jxF9rh8ApRWfsIMQSt2uE4OcpQqbFu7f7NbTK05lx80nuSijCz7sc3a277R67g	The best application!	5	0	3.4.1.1	2021-11-20 20:52:49	Thank you for your review. We're happy to hear you are enjoying Habitica! If you’d like to share any feedback with us directly, you can do that via Menu - About - Support - Send Feedback.	2021-11-22 23:55:57
436	5d17f99f-874a-4402-9e4f-c408beeae852	Nalus Charles	https://play-lh.googleusercontent.com/a-/AFdZucr0T7l8aiB6FQnuSOAy5TKvC_nrkFUJPnSZS88kNg	Great app! Helps me keep focused. :))	5	0	3.4.1.1	2021-11-20 16:33:11	Thanks so much for your review. We're happy to hear Habitica has been helpful for you in staying focused! If you’d like to share any feedback with us directly in the future, you can do that via Menu - About - Support - Send Feedback.	2021-11-22 23:56:17
437	66be28c1-f468-4524-ba2d-afbc6a539f3c	Armin Yavari	https://play-lh.googleusercontent.com/a-/AFdZuco7mEAo7W9iC5sVKYL8aBOU2nc-WVcQsQzLPzaA	You can't register	1	0		2021-11-18 19:18:07	Hi, Armin! If you are having trouble registering, please reach out to admin@habitica.com and the staff will be able to help you set up an account.	2021-11-23 00:00:01
438	baadca2f-9823-4b35-868d-50fe5429b4d6	Vinicius V	https://play-lh.googleusercontent.com/a-/AFdZuco3hWVQjitRpWrXdVyZM5EJc4tyOfEKE92CkyDLdg	Two weeks consecutively I'm experiencing crashing everytime I try to open the app, I'm now using on the browser. Never had a problem like this before hope you guys fix it.	5	3	3.4.1	2021-11-18 10:36:17	Sorry to hear that the app is crashing for you. We have made some fixes over the past few days. Please try updating to the most recent version of the app to see if that issue is resolved. If it's still happening, you can contact us at admin@habitica.com so we can help.	2021-11-10 17:17:19
439	3132ef25-8a6f-4d96-b5dc-3878d0c4ca3b	Aiman Rani	https://play-lh.googleusercontent.com/a-/AFdZucoYnaix0CnZSvmoVVS_CYwobI9hlQonqZsgLxaPdQ	I didn't use it much so can't tell if it works but I'm trying to delete my account and it's asking me for my password that I don't remember and I don't even get an option for password recovery after putting a wrong password. So annoying!	2	4	3.1.1	2021-11-18 07:58:17	Thanks for giving us a try! If you are having trouble accessing your account, please reach out to admin@habitica.com, and our support team will be able to help.	2021-11-23 00:01:10
440	6e848887-4466-482f-8542-e276cb909f3d	Tiana Le	https://play-lh.googleusercontent.com/a-/AFdZucpC_EYtTL_GLvEXfODvdYTdadAH2-v9L1kCyYdAKQ	I have it on PC and ios and android but for some reason it's in Spanish. on desktop I switched it to 'spanish' and all the text was English. I can't find this option on mobile	5	1	3.4.1.1	2021-11-18 02:24:31	Hi Tiana! We're currently experiencing a language bug. Our small team of developers are working on the fix right now. Sorry for the inconvenience, but we hope to have the bug fixed soon.	2021-11-17 21:53:27
441	e16fd91f-7dd8-47a9-a1e6-080c2d1e2075	Ali Sarbakhshi	https://play-lh.googleusercontent.com/a/AItbvmnAF6YsyxPz9CR5Gx7bEyFVEzFOBSU2WDqA0FLu=mo	Can't register waste of time	1	0	3.4.1.1	2021-11-18 00:07:23	Sorry you are having trouble registering. Please feel free to reach out to us at admin@habitica.com so our support team can help you set up an account and figure out what's going wrong.	2021-11-23 00:02:31
442	d22a9c6c-aec7-4482-aa7a-59e5f381ff64	Bryony Rosetta	https://play-lh.googleusercontent.com/a-/AFdZucrIzgYrAeBNhAQS5_8frbWUdnvJPGJWY9fRdK7c	it is fun. every time i get an egg/food/potion though, i have to drag down the spinning wheel to let it reload 😒 Edit: thanks for fixing that issue!!!	5	0	3.4.1.1	2021-11-17 04:34:45	Hi Bryony. Thank you so much for this thoughtful review. We'll keep your feedback in mind as we continue to work to improve Habitica. You can send the mobile team feedback directly by going to Menu - About - Send Feedback.	2019-07-23 16:42:24
443	25f1b8db-b632-4841-874d-79c4323a0bb9	Nostalgia 2	https://play-lh.googleusercontent.com/a-/AFdZucpPuExgQTqnXCIA_ZK_Zpa1aUvX1hG_trFLHhttGg	i have downloaded this app. I'll start using it tomorrow.	5	0		2021-11-17 04:24:57	Thanks so much for your rating. We hope that Habitica is enjoyable and helpful for you! If you’d like to share any feedback with us directly, you can do that via Menu - About - Support - Send Feedback.	2021-11-17 22:01:55
444	d3b8f9be-3cab-402a-be87-26eefaae12ff	Gaurav Sharma	https://play-lh.googleusercontent.com/a-/AFdZucquE_bRo1E2JaQQKPb3p3DwBAmaB4Ny609i62b2mA	Best app ever to build habits!	5	0	3.4.1.1	2021-11-16 18:38:28	Thanks so much for your review. We're happy to hear Habitica has been helpful for you in building habits! If you’d like to share any feedback with us directly, you can do that via Menu - About - Support - Send Feedback.	2021-11-17 21:59:48
445	57c82805-345a-4c7f-8544-83df6079d743	Maria Francis	https://play-lh.googleusercontent.com/a/AItbvmk5RU5gbfIPXOiwVgf_K4AHSC4jZvo60no6stmv=mo	I like the concept, but so far it's very buggy. I assume the habits weren't working for me, since nothing happened when I hit the + or - buttons. I deinstalled the app and reinstalled it to see if that fixed it, but now I can't login, as the login screen doesn't do anything. I also couldn't register with google at all.	1	6	3.4.1.1	2021-11-16 18:04:08	Hi, Maria! Thanks for your review. You can help us fix bugs by reporting them directly via Menu - About - Support - Report a Bug. If you're still having trouble logging in, please email us at admin@habitica.com so we can help you access your account.	2021-11-17 21:58:32
446	6529981f-44de-4769-9931-eb6d157b5e90	Abhimanyu Ray	https://play-lh.googleusercontent.com/a/AItbvmnCC6Y89n3o6bHLEKo61eHKuIpBozs7ZrpNWQh5=mo	Fun, especially for gamers	5	0	3.4.1	2021-11-16 15:47:28	Thanks so much for your review. We're happy to hear Habitica has been helpful for you as a gamer! If you’d like to share any feedback with us directly, you can do that via Menu - About - Support - Send Feedback.	2021-11-17 21:53:41
447	257960d0-b993-4495-8be6-a3157efbe0a9	Shiro Emiya	https://play-lh.googleusercontent.com/a-/AFdZucqcXqz6-k6cCFy2D2X46Ix5hayCSSIE3gm0ka3jqA	I am more productive than ever, since I've started using Habitica. This app is the real thing	5	0	3.4.1.1	2021-11-16 15:11:13	Hi, Shiro! Thanks so much for your review. We're happy to hear Habitica has been helpful for you in being productive! If you’d like to share any feedback with us directly, you can do that via Menu - About - Support - Send Feedback.	2021-11-17 21:52:07
448	ce066a42-7679-465a-932c-63865e8e93f7	Will Bennis	https://play-lh.googleusercontent.com/a-/AFdZucrKtLd1xYtOmsXYzhpwShEmsFOvFpYMQ9vdgEZEaMA	Cool but too much gamification and trying too hard to be all in one (habits, tasks, etc) without ability to set the goals and types of habits as easily as I'd like. Could be great, bit decided to try other options	4	1	3.4.1.1	2021-11-15 12:01:51	Hi, Will! Thanks so much for your review. We're sorry Habitica didn't meet your needs for tasks, dailies, and to dos at this time. We appreciate you trying us out. If you’d like to share any specific feedback with us, you can do that via Menu - About - Support - Send Feedback.	2021-11-17 21:49:12
449	8f3c3cfe-613d-4349-a892-b3aa28e0d0d8	C Groves	https://play-lh.googleusercontent.com/a-/AFdZucr5Bcxxnzk4GFqTIgdvjD-EleGGdgt2oP1s30mknR0	Use it every day, so helpful	5	0	3.4.1.1	2021-11-14 21:28:24	Thanks so much for your review. We're happy to hear Habitica has been helpful for you with your every day tasks! If you’d like to share any feedback with us directly, you can do that via Menu - About - Support - Send Feedback.	2021-11-15 01:16:53
450	533b89f5-405b-448b-a622-1d4ecd59b181	Vinh Nguyen	https://play-lh.googleusercontent.com/a-/AFdZucr23h5lsfXbPbhCuBxSXUmmtgtgHTlAeBsXz_ByOxQ	Love this app 100% but wishing more insightful record for each of my habit	4	0	3.4.1.1	2021-11-12 14:43:39	Thanks so much for your review. We're happy to hear you like using Habitica! We now have an official suggestion and comment form to help us keep track of what features users want the most. You can find it via Menu - About - Send Feedback if you’d like to add your ideas about records.	2021-11-15 01:18:37
451	f94e0e76-c579-4aec-a37c-7961dd936a64	Mars Potros	https://play-lh.googleusercontent.com/a/AItbvmnRqtArdLClnlD5hh4jRQ4bQyp8EwATbgsjsDzT=mo	Amazing tracker- I only wish I could sort alphabetically my daily tasks or that there was a calendar view. Otherwise this app makes it a lot easier to keep up with habits, to do lists, set goals - it's been saving me and helping me function since I entered a deep depressive state.	4	29	3.4.1.1	2021-11-12 13:22:11	Thank you for your review! It means a lot to know it's helping you so much. Calendar view is a highly-requested feature, and we hope to add it soon. You may find this user-made calendar tool helpful: https://habitica.fandom.com/wiki/Strategitica You can also send us suggestions & requests directly by going to Menu - About -Support - Send Feedback	2021-11-15 01:21:17
452	ba5a8d6d-28e3-46a8-95e1-9adb4054e064	C. Holliday	https://play-lh.googleusercontent.com/a-/AFdZucrttzCEgGLLjyWWTniMVTiOPT__5iAAZcvzsk2lYA	This is awesome. It helps me complete daily tasks and it makes me keep myself accountable. I just wish it had a feature to track your progress of task completion. That would make it perfect.	4	2	3.4.1.1	2021-11-12 04:07:45	Thanks so much for your review. We're happy to hear Habitica has helped to keep you accountable! We now have an official suggestion and comment form to help us keep track of what features users want the most. You can find it via Menu - About - Send Feedback if you’d like to add your ideas about progress tracking.	2021-11-15 01:24:15
453	29c03384-fe22-4ed3-9e63-51c67ce25b07	Andrew Skeen	https://play-lh.googleusercontent.com/a-/AFdZucrZcc-1EiF_WWz11MtcU49mU2yujVO36Us27UqKRAc	This is just a great app; very friendly and helpful community as well. Not to mention free. Habitica really represents the best of what's possible in the entire category of phone apps.	5	1		2021-11-11 22:50:48	Hi Andrew! Thanks so much for your great review. We're happy to hear Habitica and its community has been helpful for you! If you’d like to share any feedback with us directly in the future, you can do that via Menu - About - Support - Send Feedback.	2021-11-15 01:26:54
454	338d26cd-6471-4367-a2d1-c18b1bc86e0e	Khalid Sahib	https://play-lh.googleusercontent.com/a-/AFdZucoLkH2M_hOf9urWlZLstbBriWen8M84bwxvEXFo	the app itself is amazing and helpful. but I would really like to see a tab for others to see our scores and our daily habits.	4	2	3.4.1	2021-11-10 13:12:46	Thank you for your review and feedback. We now have an official suggestion and comment form to help us keep track of what features users want the most. You can find it via Menu - About - Send Feedback if you’d like to add your ideas.	2021-11-10 17:03:46
455	71f52f64-2e69-479e-a122-aa5eda23080c	Brittany Spires	https://play-lh.googleusercontent.com/a-/AFdZucrPI7UN400GpZOxX1UYqh1uNd5PFyJGjdRrs7uLdhc	If you struggle with tasks or starting/breaking habits, seriously get this app! It'll change your life! I thought to myself "no way am I falling for this gimmick" but here I am, being productive as hell everyday and actually keeping up with healthy habits I've wanted to do for months now. I have adult ADHD so it keeps my attention, I barely have to set a reminder to check my lists throughout the …	5	42	3.4.1	2021-11-10 13:01:39	Hi, Brittany! Thanks for your review and kind words. They mean a lot to us! We're happy to hear you've been so productive with Habitica. If you'd like to share any further feedback, please feel free to reach out via Menu - About - Support - Send Feedback.	2021-11-10 17:04:48
456	5240f504-04a6-4ee1-aaaa-6b5f5e5c839d	Corinne Jones-Hoyland	https://play-lh.googleusercontent.com/a-/AFdZucpRZndKdO2b8qapFaMuNZyTxirOEshC-gYRJjhA5u4	I would really like to be able to have a task that repeats every week and is due by the end of the week. For example vacuuming or dusting. Sadly it's kind of a deal breaker for me	3	8	3.4.1	2021-11-10 02:15:06	Hi Corinne! Thanks for using Habitica! You can set up a task in your Dailies that repeats every week on a specific day and check it off if you've accomplished it that week. Hope this helps!	2021-11-10 17:07:13
457	9e057291-0915-42da-bbd9-d92fc28c4e7f	Bryanna Morales	https://play-lh.googleusercontent.com/a/AItbvmkQURzwx5iUUNE0vbzfRUQeE6bK150UMUBJQQRy=mo	Its a really good app! But it does sometimes kick me out. But honestly its just probably my phone but the whole app i live it makes me more active 🙃 Ty guys for helping me do what I need to get done in a fun way(:	4	2	3.4.1	2021-11-08 21:52:33	Hi, Bryanna! Thanks so much for your review. We're happy to hear Habitica has been fun and helpful for you! If you’d like to share any feedback with us directly, you can do that via Menu - About - Support - Send Feedback.	2021-11-10 17:11:49
458	363efa1c-5e94-492d-a93b-c298719bd23c	Dave Gray	https://play-lh.googleusercontent.com/a-/AFdZucrNJRP-fxDWmG2szmN3JfmyluduMl8qOa9OTmN5Ng	Great concept, very helpful, very fun.	5	0	3.4.1	2021-11-08 17:59:49	Hi, Dave! Thanks for your review. We're glad to hear Habitica has been both fun and helpful for you! If you’d like to share any feedback with us directly in the future, you can do that via Menu - About - Support - Send Feedback.	2021-11-10 17:12:27
459	a4414c51-6014-40b8-b601-1cd1a8bc367b	Ur local neet aspirant	https://play-lh.googleusercontent.com/a-/AFdZucqWoAmcgkKGct175d33JJChOHitqWNLF0FpixTcLw	Best habit tracker app for people like me who are gamers ☠️	5	0	3.4.1	2021-11-08 16:05:02	Thanks so much for your review and rating. We're happy to hear Habitica has been good for you as a gamer! If you’d like to share any feedback with us directly, you can do that via Menu - About - Support - Send Feedback.	2021-11-10 17:12:50
460	27810ad5-c330-46e5-82e7-9796cf3e95fc	Ryan Centeno Arias	https://play-lh.googleusercontent.com/a-/AFdZucpCi7klTLuOJehC1encpTqSLbhc3Hv2TN9COY6L	Well done everyone! Even while buggy there is constant improvement!	5	0		2021-11-08 07:04:20	Hi, Ryan! Thanks so much for your review. We're happy to hear you're enjoying using Habitica. You can help us fix any bugs you encounter by reporting them directly via Menu - About - Support - Report a Bug.	2021-11-10 17:13:56
461	7e8e28ab-92ca-400b-8d99-28441dadf353	Living life	https://play-lh.googleusercontent.com/a-/AFdZucoL6gb6wJENC6lO-4gLWhKTFQGAr6b2YGE21eIRqg	This is more a question, do I have to pay money to play the game? Will it charge me even if I don't buy anything? Do I have to have a subscription to play?	3	0	3.4.1	2021-11-07 16:57:23	Hi! All the core functionality of creating tasks and completing them to earn in-game gold is free. You do not have to have a subscription to use Habitica, and you will not be charged for anything automatically unless you choose to purchase something or subscribe. Subscriber benefits include the ability to further customize your avatar.	2021-11-10 17:21:43
462	651de352-7ffb-4e08-b7f9-0aa3f660ec10	Mystic Knight	https://play-lh.googleusercontent.com/a-/AFdZucpphq-RlkkwRRY-cnGftODfQmFNLqZUvvZlctwP	Unforgiving. No free found health potions. Your health never increases, so there's arguably no reason to level up. If you want to change your habits, find an app that won't kill you metaphorically.	2	0		2021-11-06 20:50:39	Hi. Sorry the gamification specifics aren't what you're looking for at this time. Habiticans can lose health in several ways but can always gain it back by completing their tasks or buying a health potion with in-game gold so they don't metaphorically die after an attack or indulging in a bad habit.	2021-11-10 17:28:04
463	5c113166-c980-4ff7-a9a8-d725d7c87674	Chris Adams-Brown	https://play-lh.googleusercontent.com/a-/AFdZucodb1P7D17y5ukR9GO3WRw1BS785zSJCpf0rqChKDc	This is the only to-do list I have ever managed to use consistently for any length of time. This app supports my ADHD brain in keeping track of the things I need to do in ways that don't frustrate and overwhelm me.	5	0	3.4.1	2021-11-06 19:05:48	Hi, Chris! Thanks so much for your review and rating. We're happy to hear Habitica has been useful for you over time! If you’d like to share any feedback with us directly in the future, you can do that via Menu - About - Support - Send Feedback. Happy adventuring!	2021-11-10 17:29:29
464	ac7f2094-0dfe-4d20-bb71-ff2f73f1aaae	ophelius luci	https://play-lh.googleusercontent.com/a-/AFdZucpGrh2YQQ6AxtvJrtAKPrewG48D6Kg70PDv9_gUeQ	I've used this app for three months now and it is fantastic! It helps my ADHD tremendously and I've recommended it to all of my friends. Big love to the devs <3 There are two things i noticed that would make it even better: being able to copy messages that were sent and deleting the leaf update in the notification tab, since I can only get rid of it by clicking on the link and opening the browser	5	26	3.4.1	2021-11-06 12:51:24	Thanks so much for your review and for recommending habitica to your friends! We're happy to hear Habitica has been helpful for you! We now have an official suggestion and comment form to help us keep track of what features users want the most. You can find it via Menu - About - Send Feedback if you’d like to add your ideas.	2021-11-10 17:31:03
465	43c8bbe8-3fad-4cc1-892b-a4b1b1149d13	Parisa Algh	https://play-lh.googleusercontent.com/a/AItbvmnVdp28xImgKw6TpGgJb5zt5axWFvxwswqO10im=mo	I even tried using your website but i couldnt register. "Your client doesnt have permission to get url/login from this server" this was the messege and it was sad to see.good luck.	1	3	3.4.1	2021-11-05 18:08:17	Sorry to hear you're having problems logging in. Please contact admin@habitica.com so we can help you access your account.	2021-11-05 14:31:53
466	4dc46d52-e396-4d40-8d25-2f5b2073a446	Aeterna Nox	https://play-lh.googleusercontent.com/a-/AFdZucpaIE40Q8j6FDP05FLNIhf9Qxhstjg8pFOhcdELPA	Absolutely useful way to gamefy daily tasks and long term goals. I love the social aspect to keep me accountable, and I love that the only things you get from spending $ are purely aesthetic. It's been an great tool to help keep me focused and diligent. I don't think there has been any other app I have talked about/recommended to more people than this one.	5	45	3.4.1	2021-11-04 15:21:14	Thanks so much for your review and for recommending Habitica to others. We're happy to hear Habitica has been fun and helpful for you to stay focused! If you’d like to share any feedback with us directly in the future, you can do that via Menu - About - Support - Send Feedback. Happy adventuring!	2021-11-05 14:31:03
467	ed3a9b1f-3e29-49aa-927a-d2df90d3fae8	iftekhar ifty	https://play-lh.googleusercontent.com/a/AItbvmkzxjVK67MErKVkWSjrgo7PLZFChXPUAivk_plh=mo	Love the idea of this app. I just downloaded it and i have been loving it. I am surprised i never knew about this app until now...when play store recommed it to me...Awesome app to get your life together...one of my favourite apps ever and i have used many apps and games. thx devs.	5	2	3.4.1	2021-11-03 16:30:32	Thanks so much for your review and rating. We're glad to hear Habitica has been useful for you! If you’d like to share any feedback with our devs directly in the future, you can do that via Menu - About - Support - Send Feedback.	2021-11-03 20:48:09
468	5624c735-7703-454e-a660-fc074c5d8fbe	kitty cat	https://play-lh.googleusercontent.com/a/AItbvmmhvdqziPrbAigyENsWJwJX_i4Ya5zK2ng6byIF=mo	Daily tasks/loosing health if they aren't completed makes me a little bit anxious, but that's the point.	4	0	3.4.1	2021-11-03 04:27:01	Thanks so much for your review. We're glad you get the point of it, and we hope it will help you stay accountable and productive in the future! If you’d like to share any feedback with us directly, you can do that via Menu - About - Support - Send Feedback.	2021-11-03 20:50:48
469	5cc21604-913e-44e9-94ff-ffde5e08638a	Neil Roberts	https://play-lh.googleusercontent.com/a/AItbvmkzyxMBNYtB3viX6VKFh-_SQDBRMzW9zQQX73Di7A=mo	Excited to see some results.	5	0	3.4.1	2021-11-02 01:45:36	Hi, Neil! Thanks so much for your review and rating. We hope you see some results as well! If you’d like to share any feedback with us directly, you can do that via Menu - About - Support - Send Feedback.	2021-11-03 20:52:59
470	60c72482-fc1e-4f85-9f79-6bb9440b6625	Phillip Young	https://play-lh.googleusercontent.com/a/AItbvmk7DZ019vlKExeve9L-aHT2zaBKrYRgb2j4G5l4=mo	This app is a marvellous and intelligent creation, I am amazed at the intuitive design (from an RPG players perspective at the very least), I am excited to further refine it for myself as I continue using it. But most of all, as I write this review, I am truly grateful to the creators of this app, this is working for me, it has already instigated very positive changes to my life, and I've barely …	5	53	3.4.1	2021-10-30 07:58:12	You are so welcome! Reviews like this mean so much to us. Thank YOU for taking the time to share your feedback. We hope that it will continue to be fun and useful for you. Happy adventuring! If you’d like to share any feedback with us directly in the future, you can do that via Menu - About - Support - Send Feedback.	2021-11-03 20:57:19
471	6bc6b628-a3cd-4cb2-92c8-6cf43a30535a	Samreen Mukherjee	https://play-lh.googleusercontent.com/a-/AFdZucoZMLQvqXpYWX5eWLhcO6rfHrRJtH-_7vmLJxtNDQ	This is a great app, I've recently started using it and it's really fun. I have an issue though, I accidentally touched a task in my To Do list and now it shows as completed even though I actually haven't completed it. Is there a way to undo that? Please help...thank you :)	4	17	3.4.1	2021-10-30 07:57:23	Samreen, thanks for your review! You should be able to touch that task again to uncheck it and mark it as not completed. If that's not working for you for some reason, please let us know via Menu - About - Support- Report a Bug so the team can look into it.	2021-11-03 20:59:12
472	ed399cf1-1ccb-4999-a0f6-9dfff8040c71	mohamad mohamadi	https://play-lh.googleusercontent.com/a-/AFdZucqpKlJe4jx0dIEnijk1_gsKQUZV3QlOMPLdJZGbJw	I can't register or log in with Google, it jus doesn't do anything for me. Tried several times, nothing	2	3	3.4.1	2021-10-30 02:56:17	Hi, Mohamad. Sorry you're having trouble registering or logging in. You can contact admin@habitica.com for assistance, and the team will be able to help you out.	2021-11-03 21:01:22
473	66cfea67-26fa-4d6c-8a4b-46a54ce8f04c	Tate Schmitt	https://play-lh.googleusercontent.com/a-/AFdZucr8cZSaziDThVmJ7bTBfTTB5xbbnqJWqWE1mxX6YQ	OH MY GOODNEES THIS GAME IS SO GOOD, INSTALL THIS NOW. It's a really fun way to to chores that were never fun. And if you ever need help you can look for it in the tavern, a public place to talk to other people for help and advice. And the tavern is totally kid friendly. Do I really need to say more?	5	2	3.4.1	2021-10-29 15:58:19	Hi, Tate! Thanks for your review and kind words. They mean a lot to us! We're glad you're enjoying using Habitica and finding it useful. If you'd like to share any further feedback, please feel free to reach out via Menu - About - Support - Send Feedback.	2021-10-29 19:45:14
474	e36a0fa9-cafd-48ca-9b25-c302000993a5	Woomba Goomba	https://play-lh.googleusercontent.com/a-/AFdZucqS4cSs_gq_B0Gs23JpF1pz6zBKb6Gvtre9xjE	Its great, it has really helped me a lot. But i cant seem to sign in with my favebook account? It says i need to switch to a registered test user. How do i solve this? Really dont eant to lose all my progress	4	2	3.4.1	2021-10-29 14:56:43	Thanks for your review! We recently reactivated the Facebook sign in option, but your account is still safe and intact. Contact admin@habitica.com and they can set up a new login for you to access your account. Sorry for the inconvenience!	2021-10-29 19:46:49
475	58ab984c-4a19-4354-8aad-abd0527edc66	don sang	https://play-lh.googleusercontent.com/a/AItbvmkdmPi6ddhLnhgO3L2KC_8R1hau3g0KnkOzgclX=mo	This app is one of a kind. Great features like habbit, dailies, to do, and reward/penalty system. Great interface to connect real life with virtual reward/punishment system and track them digitally. It is, in one word, fantastic. I would recommend anyone who want to stay in track in their daily life.	4	20	3.4.1	2021-10-29 12:01:14	Thanks so much for your review. It means a lot to us! We're happy to hear Habitica has been so useful for you! If you’d like to share any feedback with us directly in the future as you continue adventuring, you can do that via Menu - About - Support - Send Feedback.	2021-10-29 19:48:29
476	ee33522b-ccf6-4aac-a6ec-b7cd504e5e3e	Nadia Rizky H	https://play-lh.googleusercontent.com/a-/AFdZucoc12qKwIHvD9iVSv4XGG1EoVejo62ufKxHFj6oPA	One of greatest apps i've ever found	5	0	3.4.1	2021-10-29 07:56:12	Thanks for your review. We're so glad to hear Habitica has been helpful for you! If you’d like to share any feedback with us directly, you can do that via Menu - About - Support - Send Feedback.	2021-10-29 19:49:50
477	e4dd5c70-0881-4215-9185-26780edaca9e	J Madison	https://play-lh.googleusercontent.com/a-/AFdZucoQJIgvE0gFoISoTLwZ-dFfNWhJeBgLlEyAzgB3Kg	I downloaded this app because I needed to get things done, and was hoping this might help that. It has helped me majorly with remembering to do some exercise, get homework done, and brush my teeth. Strongly recommend if you have low motivation or struggles with deadlines.	5	2	3.4.1	2021-10-27 17:02:36	Thanks so much for your review. We're happy to hear Habitica has been helpful for you, especially in daily activities and meeting those deadlines! If you’d like to share any feedback with us directly in the future, you can do that via Menu - About - Support - Send Feedback. Happy adventuring!	2021-10-29 19:54:00
478	ee99f5f0-c1cf-4ccd-b6cf-9d2c49d99fe9	Amber Drechsel	https://play-lh.googleusercontent.com/a-/AFdZucqLdQjCKqvyy9vVPmHp38ExengclidxlEP0-X_OHC0	Great way to help keep up with habits and to-do lists!	5	0	3.4.0.2	2021-10-26 21:16:59	Hi, Amber! Thanks so much for your review and rating. We're happy to hear Habitica has been helpful for you in keeping up with your habits and tasks! If you’d like to share any feedback with us directly any time in the future, you can do that via Menu - About - Support - Send Feedback.	2021-10-29 21:23:58
479	8c51e6fb-13a1-49df-9316-925da6bf8304	M. R.	https://play-lh.googleusercontent.com/a-/AFdZucoYQOIirLeWb1cubLmtxA-1ZOBhuS8nAoJmDjVHLQ	It seems cool I guess but it kept asking me to mark off what I did before going to bed yesterday, and gives me all my dailies unchecked? Even if I already used the app today and checked a bunch off just hours ago.. so it's not remembering anything I check off, and penalizing me for opening the app, as it keeps thinking it's a new day and I did nothing? .. so I just don't open it anymore. Wish it …	2	6	3.4.1	2021-10-26 16:14:45	Thanks for your review, but sorry to hear about this issue you're experiencing. Please let us know if you're still having trouble via Menu - About - Support- Report a Bug and the team will look into it.	2021-10-29 21:25:00
480	6c1e8bc4-3b19-4d69-b725-aa8bfc2bab28	Kenneth McArthur	https://play-lh.googleusercontent.com/a-/AFdZucoHb_4aEctiUsg06YzhjzOXSu5EUIZj9HvgrUoCMA	If you have ADHD this app can quite literally change your life. No joke. Don't hesitate just get it	5	1	3.4.0.2	2021-10-26 08:30:27	Hi, Kenneth! Thanks for your kind words and recommendation. They mean a lot to us! If you'd like to share any further feedback, please feel free to reach out via Menu - About - Support - Send Feedback.	2021-10-29 21:25:44
481	b9c730eb-96b5-4f2e-9938-38884f6e0396	Lhianna Dawn Nartates	https://play-lh.googleusercontent.com/a-/AFdZucpe-IZLwFSogi9-mpwv6fGuTIFyssyV6xe0Dvd6	this is awesome! i really enjoyed doing my tasks because of this. also the gamify part is really cool, especially the items and the pets. though, there are times when it becomes a little laggy, especially when ticking off tasks. also, i was thrilled to see a homescreen widget exists but it doesn't work quite well. but overall, it's a helpful productivity app :)	4	8	3.4.0.2	2021-10-26 06:31:54	Thanks for your review! We're glad you've enjoyed using Habitica and collecting items and pets as you do your everyday tasks. Sorry to hear that it's a little laggy for you. You can help us fix this by sending us details directly via Menu - About - Support - Report a Bug.	2021-10-29 21:27:07
482	ff79c3f3-6030-45e9-9e52-1268c956a93e	KMK Salem	https://play-lh.googleusercontent.com/a-/AFdZucqP2on0qa2HTh5sbLQDtwaWMVfd3WId-6MmWhp-1ZE	Really wish Dailys that I failed to do wouldn't just disappear, i still need to do them! Also wish I had a seperator in my todos - like maybe be able to assign them diffrent colours? i don't want to filter since i still want to see all but I'd still group em...	3	2	3.4.1	2021-10-24 08:26:15	Thanks for using Habitica. You should be able to reorder your tasks to group them by subject. And dailies should come back the next day when you check in. If that's not what's happening, please feel free to submit a bug report via Menu - About - Support- Report a Bug and the team will look into it.	2021-10-25 21:11:55
483	ba56a9ff-6f44-4e50-9cfd-1a5b7490926f	Mithansh Jain	https://play-lh.googleusercontent.com/a-/AFdZucqeTVvGqlouc5YNCDZ1CmkusrJV9zvmR7TGjt-64Q	Really very amazing app. It is really helpful to me to manage my task.💯💯	5	0	3.4.1	2021-10-24 05:16:45	Thanks so much for your review and rating. We're happy to hear Habitica has been helpful for you! If you’d like to share any feedback with us directly in the future, you can do that via Menu - About - Support - Send Feedback.	2021-10-25 21:12:39
484	234446d3-eb85-4366-b7b6-6124fea172d5	Harriet Blackband	https://play-lh.googleusercontent.com/a-/AFdZucpvh_mXDHapVWIkJt_VBdGXs3yLURT8IuRJQqHgrF0	As an ADHDer this app has helped me soooo much, I don't really use the gamified parts but I find the separate dailies/habits/to do really useful. 4 stars because it can be reaaaally slow sometimes like I'll click a task and it doesn't register it for ages, and it takes a long time to refresh which can be really frustrating. Would be so much better if I could tick off a lot of things in one go wit…	4	44	3.4.0.2	2021-10-23 11:17:17	Hi Harriet! We're glad to hear that Habitica has been so helpful for you! Sorry to hear about this issue with speed. The devs are working to improve load speed, so keep your eyes out for a new update soon. You can send more details to help us fix it, if you like, by sending us a message via Menu - About - Support - Report a Bug	2021-10-25 21:14:58
485	85979ab7-f65e-4c55-9480-1f4bc7e60964	Святой Дух	https://play-lh.googleusercontent.com/a-/AFdZucqYL0lngmPBl0CIB8l91c_pA93Qd0UgKHk4NiE_1A	No offline mode, really? App is good and the idea is unique, but inability to work without internet in 2021 makes me sad	1	1		2021-10-23 03:42:00	Thank you for your review! We plan to add offline mode in the future. In the meantime, if you’d like to let us know what features you’d use the most offline, you can do so via Menu - About - Support - Send Feedback.	2021-10-18 22:51:40
486	949ca85b-a199-44d2-9554-5b4e657f5a67	A Z	https://play-lh.googleusercontent.com/a-/AFdZucosYdlIzMeE1DSSaqvY4m_0mMwN7WIgDlhwv1q8wNk	This app would be great if it didn't push veganism so heavily. As someone who's in recovery for an eating disorder that started with veganism (and my aunt is currently dying in the hospital from malnutrition and a stomach blockage from her vegan diet) I actually find this extremely disturbing. It makes me think that this app is pro-ana, or at the very least, they're really fatphobic, ableist, and…	2	49	3.4.1	2021-10-22 00:45:26	Hi there, AZ. Habitica as a company has no position on vegetarianism or veganism. We do have user-created groups and Challenges related to those topics, and if you're seeing upsetting or triggering content there we'd very much like to know about it so that we can investigate. Please email us at admin@habitica.com, thank you!	2021-10-25 22:33:32
487	1a91c716-e42e-41bf-8453-bf803b906b74	Jodie Stephens	https://play-lh.googleusercontent.com/a-/AFdZuco5LyqyEmneRnh2a7irNd_FxQSjMjBmAK9wImW8Mg	Most organised I've been in ages! 10/10	5	0	3.4.0.2	2021-10-21 18:47:37	Thanks so much for your review. We're happy to hear Habitica has been helpful for you to stay organized! If you’d like to share any feedback with us directly, you can do that via Menu - About - Support - Send Feedback.	2021-10-25 21:19:17
488	64017bd2-1449-4bb9-bcd0-1e6e91292846	Hanna Becker	https://play-lh.googleusercontent.com/a/AItbvmnImOFOUa1zrM6fOxDKWNOu8mOp3ZBjKFlCJNLc=mo	Misses the point for me. It focuses too much on my avatar and the game and too little on the habits I'm trying to adopt. This is not helping me.	2	6	3.4.0.2	2021-10-21 06:39:25	Hi, Hanna. Thanks for giving Habitica a try. We're sorry it's not the right fit for you at this time.	2021-10-25 21:23:18
489	42c05804-ad7f-4251-9264-2befecb85f2c	Izzi Blankenship	https://play-lh.googleusercontent.com/a/AItbvmkOQUceakbmqqmb63hjwIewAVBw83L-UHMk2cKH=mo	Good app and super cute but a bit complicated. Tasks and to-dos are the same things to me so I think it is a bit over complicated but good app.	4	0		2021-10-20 21:33:55	Hi, Raye. Thanks for the review. We're glad you're enjoying Habitica. You are welcome to use just habits, dailies, or to dos. We designed the app to be flexible and work for people who have the same tasks every day or just one-off tasks (to dos). There's also a wiki if you want to learn more: https://habitica.fandom.com/wiki/Habitica_Wiki	2021-10-25 21:26:58
490	38454dd0-fcbc-4735-95e6-2fcced165da9	Sophia Hampton	https://play-lh.googleusercontent.com/a-/AFdZucq7C4-XiNvl8sTuIus8G9Cw55MHFG-X1mZfmNlZ	A tad buggy but it's perfect for organizing my daily tasks and I was even able to join a community. So fun!	5	0	3.4.0.2	2021-10-20 15:03:46	Hi Sophia! Thanks for your review! You can help us fix any bugs you find by reporting them directly via Menu - About - Support - Report a Bug. Hope you have fun in the community!	2021-10-25 21:27:37
491	78c0a39f-94d2-4709-b464-8c5caa97950a	Mike Keizer	https://play-lh.googleusercontent.com/a/AItbvml0CyBnrRonjGfhaewjDV6LI8SB0jch07nWkOcA=mo	Only fun for kids. No option to put major goals that can be unlocked after certain skills or levels have been reached	3	1		2021-10-20 06:31:14	Hi, Mike. Thanks for trying Habitica. We do have many adults who enjoy the app, but we're sorry it wasn't the right fit for you. We now have an official suggestion and comment form to help us keep track of what features users want the most. You can find it via Menu - About - Send Feedback if you’d like to add your idea about unlocking skills.	2021-10-25 21:29:02
492	935a2f29-04f3-41e2-83d6-689f1f36c37f	Couch Potat	https://play-lh.googleusercontent.com/a-/AFdZucq97AvNyvbnAib0a00zc2AdLg-bY87pMNpWM9CxkQ	Stop reading this and install. This is a daily part of my life. It's the best. It's free, it's open source, and the people behind it care about the community	5	0	3.4.0.2	2021-10-20 06:02:03	Thanks so much for your rating and feedback here. We're happy to hear Habitica has been helpful for you! If you’d like to share any feedback with us directly, you can do that via Menu - About - Support - Send Feedback. Happy adventuring!	2021-10-25 21:20:13
493	03f782a5-4a83-4b71-9ad9-c11dc10a8e3f	Mauricio Osegeda Montesinos	https://play-lh.googleusercontent.com/a-/AFdZuco6odBQA4fwbzlAOqk8P71YDDJ447HHVYqqxPfRZw	The app is great, but I'd like you to add offline mode.	4	0	3.4.0.2	2021-10-19 06:50:09	Thank you for your review! We plan to add offline mode in the future. In the meantime, if you’d like to let us know what features you’d use the most offline, you can do so via Menu - About - Support - Send Feedback.	2021-10-25 21:17:47
494	7f9becd1-64bc-4ec0-92f1-f24c70f3d630	Richard	https://play-lh.googleusercontent.com/a/AItbvmnlSFyTm1fJmFENfLh2OvUb0iRCh4NjsY0jvNT3=mo	i like the concept of the app, it's definitely better than a plain boring habits tracker. but it's a bummer there are no statistics or calendar overview / history which almost all of the other apps have. and it would he a good idea to add an option to make the reminder notifications sticky.	3	2	3.4.0.2	2021-10-18 15:21:31	Hi, Richard! Thanks for your review and feedback. We’re actually working on graphs and stats right now and hope to add them very soon! In the meantime, you may find the Data Display Tool one of our devs created helpful: https://oldgods.net/habitrpg/habitrpg_user_data_display.html . You can also make suggestions via Menu - About - Send Feedback.	2021-10-18 22:46:08
495	76cd423d-65e9-48db-9796-e19472a996b6	Daniel Han	https://play-lh.googleusercontent.com/a-/AFdZucqTJNybiyJNd9MCK1xRhMmMCoLAil5_tIue6QPi	"Server connection lost"	1	0	3.4.0.2	2021-10-18 01:01:51	Hi Daniel, You may have run into some server issues we had at the time you posted- let us know if you're still having trouble via Menu - About - Support - Report a Bug and the team will look into it.	2021-10-18 16:56:10
496	445e87b3-ede1-4956-9177-6b8037e1aab7	Ash Lynx	https://play-lh.googleusercontent.com/a-/AFdZucpN3y5p2a3eNVWVetW4kZSfU3acA78X9bIAJtQ53A	It says server connection lost and that my connection is not secure when I tried to access it through my email/google chrome. Was this app hacked?	1	3	3.4.0.2	2021-10-18 00:44:30	Hi Ash, You may have run into some server issues we had at the time you posted- let us know if you're still having trouble via Menu - About - Support - Report a Bug and the team will look into it.	2021-10-18 16:56:00
497	f8ce0802-4923-428e-a18b-a395b9105c24	Adeniran Iteoluwa	https://play-lh.googleusercontent.com/a/AItbvmkK-qvcQxA2mbly0T3wYeEU-23EPYTnzCPlAyEC=mo	The app is very good and i love it. But can you please be make the avatars more nice and clear.	3	1	3.4.0.2	2021-10-17 07:44:54	Hi, Adeniran! Thanks for your review. We're glad to hear you love the app. Our pixel artwork is done by volunteers from our community and is intended to evoke a retro style. Sorry it's not your cup of tea!	2021-10-18 22:48:30
498	95a0c421-ad75-4d99-a345-8ec8b61f2b83	Luc PDX	https://play-lh.googleusercontent.com/a-/AFdZucpai9YthPQu3SzBBgNKm7SO6FRC87uIPdT2uObmvA	It's a chill app if you don't chat. Mods interpret comments however they want. When asked for clarification on how to more clearly interact or come to an understanding, mods declare users can't message mods/ask about it in chats/message anyone else on the app about it. It's also okay for multiple mods to address one issue, effectively allowing them to "gang up". It seems fairly authoritarian to t…	1	10	3.4.0.2	2021-10-16 23:32:48
499	570a5de4-3fa0-4dd4-aad5-35bc3982c9c4	Nitish Sainani	https://play-lh.googleusercontent.com/a-/AFdZucqnySdGxqiGWq-PJW6RgvxuI6MRBsJSrd_szX-DDg	Oh god, I was about to write the code for this app for myself, but you saved me. This is implementing Atomic Habits	5	1	3.4.0.2	2021-10-16 15:26:17	Glad to hear it! We hope that you continue to enjoy using Habitica! If you’d like to share any feedback with us directly in the future, you can do that via Menu - About - Support - Send Feedback.	2021-10-18 22:50:15
500	9783f134-1d55-48dd-b0fc-1b83e03aa641	Wilson Wijaya	https://play-lh.googleusercontent.com/a-/AFdZucqhpFyPtkTi02oF0QzsD0bjmNDrU8_1oMBFt9BzDg	Great app to remind but it's alright.	4	0	3.4.0.2	2021-10-16 08:53:57	Hi, Wilson! Thanks for your review and kind words. They mean a lot to us! If you'd like to share any further feedback, please feel free to reach out via Menu - About - Support - Send Feedback	2021-10-18 22:52:10
501	307fd032-4edd-4943-add3-75a7332ad678	Petites Méduses 12	https://play-lh.googleusercontent.com/a-/AFdZucrkB_6ca6o0uMjZNAvzwtx8AeYtXDC60MftYcspqg	It's great, I have very poor memory and this app helped me remember my tasks and it's a lot quicker than writing on a table calendar. It also feels great when you are rewarded for doing things you've never got rewards for.	5	6	3.4.0.2	2021-10-15 14:28:48	Thanks so much for your review. We're happy to hear Habitica has been helpful for you in remembering and accomplishing your tasks! Enjoy your virtual productivity rewards! If you’d like to share any feedback with us directly in the future, you can do that via Menu - About - Support - Send Feedback.	2021-10-15 15:37:56
502	8a4a7313-4907-4f5d-b9ae-4e01b7d3a0aa	Gautami khante	https://play-lh.googleusercontent.com/a-/AFdZuco0q8xDn2ZycEvJsCkpDvXjw_nMgy-ZhMVBSxktwg	It's a good app.. but it would be great if it had a pomodoro timer too as the chrome extension has it already.	5	1	3.4.0.2	2021-10-15 12:19:57	Thanks for your review and feedback! We now have an official suggestion and comment form to help us keep track of what features users want the most. You can find it via Menu - About - Send Feedback if you’d like to add your ideas.	2021-10-15 15:47:42
503	1e694625-b781-4025-a5e6-0f41cf382a3f	puhfrugherter	https://play-lh.googleusercontent.com/a-/AFdZucpT9z0kwhS030498tqS_d6OhVrBEr78oDMNveb6	It's pretty decent for what it is, but it would be good if you could have pages for dailies corresponding to each day of the week, and maybe also set times to send notifications as reminders for each daily.	3	10	3.4.0.2	2021-10-15 11:28:56	Thanks for your review and rating! We have an official suggestion and comment form to help us keep track of what features users want the most. You can find it at Menu - About - Send Feedback if you’d like to add your ideas.	2021-10-15 15:48:10
504	cad3e59a-fc67-4d53-b4fe-c9e261be718e	Kasemsan Kasemweerasan	https://play-lh.googleusercontent.com/a-/AFdZucrABIIcbW-h48_SGUCXgxoV5fMUcxunfTP06uJbMQ	Brilliant.	5	0		2021-10-15 11:09:26	Hi, Rusty! Thanks so much for your review. If you’d like to share any feedback with us directly in the future, you can do that via Menu - About - Support - Send Feedback.	2021-10-15 15:48:41
505	220d9577-9e7d-4ebe-8828-cfc7a8c1f3a4	Anthony Sellner	https://play-lh.googleusercontent.com/a/AItbvmmBeXo5Ehj5VF8QRAzNxtdQ_bGtHjbFXjpBSUaK=mo	This app is really well done at gamifying habits, chores, and to do lists.	5	0	3.4.0.2	2021-10-14 15:02:11	Thanks so much for your review. We're happy to hear Habitica has been enjoyable for you in working on your habits and chores! If you’d like to share any feedback with us directly, you can do that via Menu - About - Support - Send Feedback.	2021-10-15 15:45:32
506	87c45f88-a74d-49b7-887f-f64f80c3ec2b	DJ Nightstep	https://play-lh.googleusercontent.com/a-/AFdZucrxmwW_OlRNLg3CbyUGqa7DUECsfTIVGfI-MpGT	I decided to install this app on a whim because I liked the visual style and thought the idea of a video game style habit tracker was cool. What I didn't expect, however, was me finishing things I had been putting off for WEEKS on the first day, and I instantly fell in love. Currently, I have developed so many good habits, I even floss. My only critique is the limited customisation options, but t…	5	54	3.4.0.2	2021-10-13 22:45:32	Thanks for your review and rating. We're happy to hear Habitica has been so helpful for you instantly! If you’d like to share any feedback with us directly, you can do that via Menu - About - Support - Send Feedback. And as you keep working on your habits, more customization options will be available, especially during the gala events.	2021-10-15 15:43:50
507	413a9b8f-71c6-476a-ab91-650031287e13	Will Fordham	https://play-lh.googleusercontent.com/a-/AFdZucoiZL13nAucuHDavw6ifitd9OsDBbpA5B-j_4nQiQ	Love the app: if I could make two suggestions, I would say that an option to have a UK date format would be easier and a chance to expand the viewing panel of the character and perhaps see some small animation would be fun.	3	16	3.4.0.2	2021-10-13 19:37:47	Hi, Will! Thanks so much for your feedback. We're glad to hear you love the app. There's an option for changing date formats in the web version, but you're welcome to suggest it and expanding the viewing panel to our app developers via Menu - About - Support - Send Feedback.	2021-10-15 15:41:50
508	6f05bb83-7274-49d4-8f9e-b18fb6d92d30	maranda hubbard	https://play-lh.googleusercontent.com/a-/AFdZucrq8FNz1WvTbUCWRu8vhmjQLoRcx01xeoWUVEHeRw	This app is very cool and I think a genius idea and concept. This app really helps me with organizing my life. I also think this app is helping me honestly with my mental health. Struggling with depression and learning how to feel better with small steps everyday. I love that I can set my own goals and I truly feel better each day when I check off something even small. I am a video game fan and s…	5	10	3.4.0.2	2021-10-13 07:25:23	Hi Miranda! Thank YOU so much for your review! We're happy to hear Habitica has been so helpful for you with your life tasks and mental health! Hearing this means a lot to us. If you’d like to share any feedback with us directly, you can do that via Menu - About - Support - Send Feedback. Happy adventuring!	2021-10-13 12:59:41
509	6f87f6e8-d918-4a6d-8f45-10ea28975f8a	Nathan Kaltz	https://play-lh.googleusercontent.com/a-/AFdZucq9RQ8w-YveVUGc1deTIUHgaqpEHG77P5dxtmc1NQ	Made me very productive in just a few days!	5	0	3.4.0.2	2021-10-12 15:04:38	Thanks for your review. We're glad to hear Habitica has helped you be productive so quickly! If you’d like to share any feedback with us directly in the future, you can do that via Menu - About - Support - Send Feedback.	2021-10-13 13:02:58
510	448b57db-b5ec-41f5-88a6-081379aef0f6	K W	https://play-lh.googleusercontent.com/a-/AFdZuco8NFH5HP7BQhqYksuuKUBo9UJRBYo2Sv_VamQ60w	I been getting into this app since a few days ago and I already love this app!! It gives me the greatest motivation to do even the smallest things I tend to laze out so easily without being bored. I tried out a couple of similar apps but they are nothing compared to Habitica, the difference? New constant content always since years ago and ways to make your work rewarding. Hands down the most moti…	5	17	3.4.0.2	2021-10-12 04:45:07	Thanks so much for your review. We're happy to hear Habitica has been motivating and fun for you! If you’d like to share any feedback with us directly, you can do that via Menu - About - Support - Send Feedback.	2021-10-13 13:05:08
511	4fb7840b-ed49-446b-870d-ce98f9a3a044	Ophelia Wintland	https://play-lh.googleusercontent.com/a/AItbvml0HS7QBm8tIHgvxsblvXGiQBi4s2iGNMwHdQRQ=mo	Very depressing. I put in the effort for quests. I got excited about my pending damage for nothing. Quest ends just before my cron and all my pending is lost. I haven't been able to use my pending anything for days. That's not motivation. It's devastation. It never matters if i task or don't if my whole turn is skipped because of timing. Working hard for just collecting stuff and never getting to…	1	0		2021-10-11 16:57:52	Hi Valerie! Sorry to hear that. You might want to talk to your fellow party members about sharing the workload or maybe finding another party that could use your help more. Because there are Habiticans all over the globe, you might find a different party works better for your start/end of day timing or one that better matches your play style.	2021-10-11 22:13:26
512	b310b2be-d350-4ca6-94ab-ca84a11af930	J W	https://play-lh.googleusercontent.com/a-/AFdZucq3Jabvjvlz60AJnIHGvPPGqXVXDkQ9D9KCwOrc1Gc	Requires agreeing to a Privacy Policy and the establishment of an account w an associated email, username, password. 1) There is no reason why some company needs to know my daily stuff (or yours)! 2) Between banking, school, online retail, social media, etc I already have too many log-ins to maintain. Uninstalled before I got past 1st screen.	1	1		2021-10-11 14:37:52	Sorry Habitica did not meet your needs at this time. Thanks for giving us a try.	2021-10-11 22:16:47
513	8f0f9ed4-19b2-49f0-ba52-61d88c6c52a8	William Burchett	https://play-lh.googleusercontent.com/a-/AFdZucrHTWFyIAIMxZQtrGhst8b--4fGbThAUILyiW79jw	Cool as hell thanks	5	0	3.4.0.2	2021-10-11 05:09:07	You're welcome, and thank YOU for your review! We're happy you're enjoying Habitica! If you’d like to share any feedback with us directly, you can do that via Menu - About - Support - Send Feedback.	2021-10-11 22:19:27
514	18344ada-1f12-498d-b63d-1addc96af7ae	BIG MAN	https://play-lh.googleusercontent.com/a-/AFdZucptXvBl3YmSAfCsR8q3C2GM9XN4NbLcaEXF3NKC	Think this app is amazing because it helps me tackle challenges and be more organized in a fun and entertaining way.	4	4	3.4.0.2	2021-10-09 23:58:17	Thank you for your review. We're happy to hear Habitica has been helpful and entertaining for you! If you’d like to share any feedback with us directly, you can do that via Menu - About - Support - Send Feedback.	2021-10-11 22:21:35
515	5f931fe6-a833-4a13-b002-5794a03f0187	Melissa Killoran	https://play-lh.googleusercontent.com/a-/AFdZucqYBwT_RpKfB-BnEtO6P7nBmTHTI_LMgPFMQJJwoiE	It would be so cool, as a parent, to have access to assign tasks from my phone to a child with ADHD's phone, so he knows what he needs to do for that day/week. I really need something like that!	4	2	3.4.0.2	2021-10-09 16:24:00	Thanks for your review and feedback! We now have an official suggestion and comment form to help us keep track of what features users want the most. You can find it via Menu - About - Send Feedback if you’d like to add your ideas.	2021-10-11 22:22:16
516	05868911-79c9-4130-a5f8-10458287eca3	Sam	https://play-lh.googleusercontent.com/a-/AFdZucroIq6ojlA1md6KjXrhNrDGHTrUP2JXaOwAZNO2Gg	As someone who really struggles functioning, I think it's really beautiful and amazing that someone would go out of their way to make this app. I just opened it up and setup for using it, and I already know it's going to be extremely helpful and fun. I've been using all kinds of different counter and planning apps simultaneously to try to function, but this puts it all together in an artsy way th…	5	14	3.4.0.2	2021-10-09 11:17:18	Thanks for your review and kind words, they mean a lot to us! If you'd like to share any further feedback, please feel free to reach out via Menu - About - Support - Send Feedback. Happy adventuring through real life!	2021-10-11 22:23:39
517	9170ec00-59c6-4331-9eab-56564e4b4078	t1Pz	https://play-lh.googleusercontent.com/a-/AFdZucpm4sxX91zCXmca-C-DJF99W_kQJduYqmDdi3kRww	This app is pretty good! I love it and I'm enjoying the features. However, it's kinda useless at situations when there's no internet connection. I hope you guys can do something about it... I am reminded of Google Docs, where when you're offline, you can still access some documents and edit them—though it can only save the document within that same device and it won't get saved and synced into th…	3	138	3.4.0.2	2021-10-09 03:21:40	Thank you for your review! We plan to add offline mode in the future. In the meantime, if you’d like to let us know what features you’d use the most offline, you can do so via Menu - About - Support - Send Feedback.	2021-10-11 22:24:44
518	569e3240-661b-431c-9087-5a5260a6cc79	Quinn Fenimore	https://play-lh.googleusercontent.com/a/AItbvmmkKrEUx0XTttVlG26Xi_ZdmL2i1l5MNkPBfVX4=mo	This app is absolutely amazing!! If you have ADHD stop reading and get this app now you will not regret it! As someone whose natural reward system is totally wack having this app with all of its amazing customizations, rewards, penalties, points, items, pets, community options ect. has completely changed the way I interact with my responsibilities in life.	5	97	3.4	2021-10-08 18:39:54	Thanks for your review and kind words. They mean a lot to us! We're glad you're enjoying Habitica and all its options! If you'd like to share any further feedback, please feel free to reach out via Menu - About - Support - Send Feedback. Happy adventuring!	2021-10-11 22:28:55
519	13a9a5b6-3eee-4222-aff5-ce024de047e7	RavenZ	https://play-lh.googleusercontent.com/a-/AFdZucp1fde73feRf2y-s_ARoIn_iFNbbz7ABBlQM9POPQ	Hey there I just wanted to add a suggestion that please add a notes feature for students ans other people	4	0	3.3.2	2021-10-08 08:26:26	Thanks for your review and feedback! We now have an official suggestion and comment form to help us keep track of what features users want the most. You can find it via Menu - About - Send Feedback if you’d like to add your ideas about a notes feature.	2021-10-11 22:29:27
520	f2135d4d-6b2d-46f3-ae9e-12b6b3ece72d	Irene Wolf	https://play-lh.googleusercontent.com/a/AItbvmlVv4NKvTPlp1X_av2m4ZK2JtNappWnPPmRdRMN=mo	I have no problems with it. But i just joined, and I feel like I missed something. Says I can change my class in settings, do I need to hit a certain level first or... ?	4	0	3.4	2021-10-08 04:13:01	Thanks for using Habitica! There is a tutorial that should walk you through things, but you can also find answers on the wiki: https://habitica.fandom.com/wiki/Habitica_Wiki The ability to choose a class is unlocked at level 10 (until then, you're a warrior by default).	2021-10-11 22:31:45
521	ab89fd35-047c-4638-a9bf-07b59dadac5e	Dan	https://play-lh.googleusercontent.com/a-/AFdZucq7vR2hIEPOI0I2VivRPwGnDg6HhEd-lMjY3cQM7A	This is a game/life helper, I don't use it as much as I should but I am really happy I have it.	5	0	3.4	2021-10-07 17:13:14	Thanks so much for your review. We're happy to hear Habitica has been helpful for you! It's yours to use as much or as little as you like. If you want to share any feedback with us directly in the future, you can do that via Menu - About - Support - Send Feedback.	2021-10-11 22:37:05
522	754653e1-cf22-42b8-a22c-a015a34c9a97	Levin Asyrura	https://play-lh.googleusercontent.com/a-/AFdZucoVDncD7gnaxdCEgMCbU3ZUYnRhWNoamzWmQkjJHQ	Sounds stupid, I know. But it works, pretty well. So it aint stupid, it is actually kinda weird, but it works, like a charm. 5/5	5	0	3.3.2	2021-10-07 11:22:00	Thanks you for your review. We're happy to hear Habitica has worked well for you! If you’d like to share any feedback with us directly, you can do that via Menu - About - Support - Send Feedback.	2021-10-11 22:37:39
523	c9c33e50-02ea-45c7-84b2-3b0eb468897c	Prescot Cook	https://play-lh.googleusercontent.com/a/AItbvmmevee_QUVP36-aOZwyU5wd_dVxQJ6NCWtkfqiu=mo	This app is awesome!!! One suggestion though. I wanna level up and fight my friends. Somehow. Or fight quests or maybe dragons like old school pokemon style. Idk just food for thought!!!!	5	0	3.3.2	2021-10-07 00:57:59	Thanks for your review and feedback! You and your friends in a party can go on quests to beat dragons and other monsters. We now have an official suggestion and comment form to help us keep track of what features users want the most. You can find it via Menu - About - Send Feedback if you’d like to add your ideas. Happy adventuring!	2021-10-11 22:40:28
524	91d1b05d-3037-498b-aba8-98db0c389e63	Brick boaters	https://play-lh.googleusercontent.com/a/AItbvmmVOTu1hfi_vHv5Vh0BF8EAn_rr65ro8ltliixY=mo	I have ADHD and chronic depression, I either can't remember what to do or can't get up to do it. this app has helped so much, Like helped more than my therapist. Thank you for making this app	5	0	3.3.2	2021-10-06 21:49:04	Thanks for your review and kind words. They really mean a lot to us! We're so happy to hear Habitica has helped you. If you'd like to share any further feedback with us in the future, please feel free to reach out via Menu - About - Support - Send Feedback.	2021-10-11 22:41:54
525	7b876481-8bce-44e4-b9f8-49e35f6e096a	Mohsin Shabbir	https://play-lh.googleusercontent.com/a-/AFdZucrufoS9gDJwPP2rRbvKGTFItRdLWhW0bg6vWNTrlg	Gets things done!	5	0	3.3.2	2021-10-06 09:17:19	Thank you for your rating. We're glad you chose Habitica to help you get things done!	2021-10-06 13:47:42
526	4a86507f-1339-422e-bdbd-f35322a9ca71	Shy Guy	https://play-lh.googleusercontent.com/a-/AFdZucrBPNa7GJTzxvIfz9IdJx-NoRkEKhI4Ij24ov2i	cool	5	0	3.3.2	2021-10-06 06:32:52	Thanks for your review and rating. We're glad you like Habitica.	2021-10-06 13:48:10
527	d3292e40-d772-4a3b-a0aa-1764ab643d2a	Heather Liederman	https://play-lh.googleusercontent.com/a-/AFdZucrbCHnZAmMm_CrFWyLJSroW0Cm1PjRwNX0wnRwyfQ	I can't seem to equip any of my items. 😑 the rest of the app is great but ...	1	0	3.4	2021-10-05 23:25:17	Hi Heather! The latest version of the app has fixed this bug! Please update your app and try again if you're still having trouble with this.	2021-10-11 22:42:51
528	380f28f5-a219-4737-8da2-df9a3138066b	Victor Vu	https://play-lh.googleusercontent.com/a-/AFdZucpdMvjFtLO5eWch1YrwY1FF8_di2qpauHgQ4426hg	Habitica doesn't make new habits for me because i forget to do them	1	1	3.2.2	2021-10-05 12:05:19	Hi Victor! Thanks for giving Habitica a try. We're sorry it didn't meet your needs at this time.	2021-10-06 13:57:01
529	142f1569-413a-4619-80f6-c170446d1886	Maria D	https://play-lh.googleusercontent.com/a-/AFdZucpNfthB2by4NJubKPSQyE-IR2397xC29jZqxszmRQ	The special mounts menu is empty and doesn't show any free mounts to tame! My friend has the iOS app and has a free special mount!!	3	0	3.3.2	2021-10-05 08:08:29	Hi Maria! Is your friend a subscriber by any chance? Or perhaps your friend joined before our annual Naming Day celebration and got a mount free during that event? You can learn more about mounts, including rare ones and special event ones, here: https://habitica.fandom.com/wiki/Mounts	2021-10-06 14:07:52
530	15ccc49d-9870-41e2-abab-8667e2de7505	Mike Neuliep	https://play-lh.googleusercontent.com/a/AItbvmlrgP62L4ztNIDGbq7KsW9sZ_VyI257vJZn3Lyq=mo	This is a great game.That said I think that there can be a few changes with the coin and gem system.I wish you could buy gems with gold(I think 50 gold a gem would be reasonable)because I dont really want to pay money to a game.I know the only way currently to get gems is if you buy them or a subscription.So please fix this and I will give 5 star.I found out that you can do challenges to get jems…	5	14	3.3.2	2021-10-04 20:08:02	Hi Mike! Thanks for your review and feedback! We now have an official suggestion and comment form to help us keep track of what features users want the most. You can find it via Menu - About - Send Feedback if you’d like to add your ideas about coins and gems.	2021-09-22 18:05:56
531	dda1dc99-5f69-452d-ac19-99533cb331bb	Adeeb Ahseek	https://play-lh.googleusercontent.com/a/AItbvmkqUpGp2j30oWogmo1YwmwX7TKAl5Q8sLgLTUM4=mo	I like the app tbh... However it's strict haha, I do agree that it is helpful to some to improve productivity... But for people like me who can't cross out the tasks within the day and do it after midnight, when you loses health basically... It's not that motivating... So maybe adding an option where we can adjust the difficulty to our likeliness would be a good feature.. Cuz I'm already strict w…	3	9	3.3.2	2021-10-04 16:39:45	Hi Adeeb! You can adjust the difficulty of your tasks in Habitica so you don't lose as much health. You can also adjust the time your day restarts if midnight doesn't work well for you. For tasks that might not be done in a day, you can use the To Do list instead of the Dailies list. We hope it continues to be helpful in improving productivity!	2021-10-06 14:12:21
532	d7ca1449-2a12-4cdb-88e0-881f76a8281a	Maryam Naderi	https://play-lh.googleusercontent.com/a-/AFdZucrx1kXMVTC5haY_l5P_u6XK0D9KUrf1ZzjVJGT5mQ	It fails at signing in. I even used a VPN to make sure that the problem is not the country I'm living in.	1	8	3.3.2	2021-10-04 14:41:49	Hi Maryam! Sorry to hear you're having trouble signing in. If you're using Facebook to log in, that might be the trouble, and we can fix it for you. Please reach out to us at mobile@habitica.com and the team will be able to assist you.	2021-10-06 14:14:10
533	87e9bae2-ef95-4a7c-ac0d-e07a0b2c2f98	Kristina Wilson	https://play-lh.googleusercontent.com/a-/AFdZucqOIDmfl11Jm0LDJOH97PFnkliDvMiwCMjC2jUJ-Q	So much fun! Love setting up rewards and this makes tracking even more exciting!	5	0	3.3.2	2021-10-03 18:37:26	Hi Kristina! Thanks so much for your review and enthusiasm. We're happy to hear Habitica has been helpful and exciting for you! If you’d like to share any feedback with us directly in the future, you can do that via Menu - About - Support - Send Feedback.	2021-10-06 14:19:17
534	bebcd19e-e441-483d-85f6-05085c10ad8e	Saul Sanchez	https://play-lh.googleusercontent.com/a-/AFdZucogiIXKHeNoSAsjeXrIyZuSlMT9w693UDjpeY8Y	This is fantastic. Just an amazing way of tackling your life in an entertaining way. I have adhd, and I found that the various incentives and disincentives offered by this app, as well as the customization of your tasks (being able to set up daily tasks, to do lists, and habits) and community challenges to help you make some life-bettering choices. That's not even all of it. Give this app a check…	5	45	3.3.2	2021-10-02 16:16:20	Hi Saul! Thanks for your review and kind words; they mean a lot to us! We're happy to hear Habitica has been helpful for you! If you’d like to share any feedback with us directly, you can do that via Menu - About - Support - Send Feedback.	2021-10-06 14:21:16
535	898ae3df-0689-4f45-b7e4-8f3442c9a867	Boi Boiman	https://play-lh.googleusercontent.com/a-/AFdZucqRvB5ms19GGRkNdYcJsbrWzMmlBIbIand0_iov	Very interested in the app, but character customization isn't working at all. I tried to just deal with what I had but it won't let me finish creating the character.	1	1	3.3.2	2021-10-02 01:46:24	Thanks for your interest, but sorry to hear about this issue. Please let us know if you're still having trouble via Menu - About - Support- Report a Bug and the team will look into it.	2021-10-06 14:22:11
536	d38eb1e8-0252-4d3d-bb49-30720e7db19e	Valerie Wintland	https://play-lh.googleusercontent.com/a-/AFdZuco3L4x8oHruOEORpzwyfMIWx_T8J9airwH7r4Hnmw	Idk i thought this would make things fun but it actually makes it more frustrating. The game allows you to kill monsters with your tasks a a team. But i think if you teammates kill it before your turn you just get rewards and the points are waisted.	3	0	3.3.2	2021-10-01 21:55:54	Hi Valerie! Thanks for taking the time to leave a review, and sorry to hear about the frustration! We hope that you can take pride in accomplishing your tasks, even if they go to helping your stats and not defeating monsters as well. You might chat with your teammates about dividing up the responsibility or trying some harder quests.	2021-10-06 14:30:21
537	473e64b3-86ce-4e8d-aa55-6ca5ba25b4ea	Luke Molnar	https://play-lh.googleusercontent.com/a-/AFdZucr5UNhqtV2ZL1wxdtbqLODuLIx7zdiQPrTSru6VYZA	Can't make an account. Username screen is broken. Every usename is taken no matter what you type in and no matter how long or random.	1	0	3.3.2	2021-10-01 03:33:10	Hi Luke. Sorry to hear you're having trouble making an account. Please let us know if you're still experiencing this problem by sending us a message at mobile@habitica.com and the team will look into it and help you out.	2021-10-01 14:39:54
538	e408c1fc-8d10-4aeb-89cd-40701284dfbd	Christina Lal	https://play-lh.googleusercontent.com/a-/AFdZucqcI5-v9rjgs35M_5LAw3jQQTmBcGqgZSAoFSWPMQ	Best app ever!! It has legit changed my life for the better. I highly suggest you subscribe to get the most meaningful experience out of it.	5	0	3.3.2	2021-09-29 15:32:47	Thanks so much for your review and your subscription. We're happy to hear Habitica has been useful and life-changing for you! If you’d like to share any feedback with us directly, you can do that via Menu - About - Support - Send Feedback. Happy adventuring!	2021-09-22 18:06:38
539	c41a5c07-43b0-457d-865e-25a9da91e9d6	Abigail Grace	https://play-lh.googleusercontent.com/a-/AFdZucoKvHFkA5NCgHdWYVEnJxi01PFB0lmBVZBp5amaLw	A very well-made app, which really does make doing chores feel like a game. If only the chores themselves could be done in game... but unfortunately I don't think our technology is quite to that level yet.	5	0		2021-09-29 03:53:10	Hi Abigail! If only! :-) Thanks so much for your great review. We're happy to hear Habitica has been helpful for you! If you’d like to share any feedback with us directly in the future, you can do that via Menu - About - Support - Send Feedback. Good luck with those chores!	2021-09-29 15:26:42
540	061924fe-3f35-4f58-9fc0-619f8e6f9b5b	Benchi	https://play-lh.googleusercontent.com/a-/AFdZucpqTrRZH1HUiUbaJURHBWEZbxdhnaxDcWtKYMN0	Really liking it so far, would like to see a lock feature!	5	0	3.3.2	2021-09-29 02:28:42	Thanks for your review and rating. We're happy to hear you like Habitica so far! We now have an official suggestion and comment form to help us keep track of what features users want the most. You can find it via Menu - About - Send Feedback if you’d like to add your ideas about a lock feature.	2021-09-29 15:27:36
541	ca830be0-f0ee-4b08-81a8-580900c194c6	Nalanie Stevenson	https://play-lh.googleusercontent.com/a-/AFdZucoG0ZbRhLnfyGabj6Tgm5agSqTpbmPRzc-wE3MgyA	This is a great and fun app to use and helps me form good and healthy habits and makes my days more fun but I have tried changing my class and I don't know how I've level 10 and I couldn't change my class I use this app on my phone so maybe that has something to do with it	5	0	3.3.2	2021-09-28 21:41:37	Hi Nalanie! Thanks so much for your review. We're happy to hear Habitica has been helpful and fun for you! You can choose your class once in Settings. You will need to be Level 50 and purchase the Orb of Rebirth to change your class again. If you're still having trouble via Menu - About - Support- Report a Bug and the team will look into it.	2021-09-29 15:34:58
542	3e5fdda4-c254-44cf-a8d7-235c0e693b1b	H. Danielson	https://play-lh.googleusercontent.com/a-/AFdZucoUe5drQgqX5zcTHWF5eAskAXM3h32WczoBNtotbd4	Too complicated	1	0		2021-09-28 21:28:11	Hi! Thanks for trying Habitica out. We're sorry you found it to be complicated. You might find the built-in tutorial or the wiki helpful if you want some additional assistance using the app: https://habitica.fandom.com/	2021-09-29 15:37:55
543	78237abd-cc79-4620-93bf-2f6de8081fc4	Charlee	https://play-lh.googleusercontent.com/a-/AFdZucq0c3yJUPavJhHkDaSIQ54xjrXGUW0XhppaZpD0-Q	One of the best habit apps. I had it a lot longer then any other mental health app on this phone before. Its engaging, encouraging, and motivating to do. It's fun! It's amazing! (I un-downloaded it because I'm super bad at focusing and attendance, so i often forgot about the game. But if I was able to keep attending i definitely would get it again)	5	0		2021-09-27 13:30:24	Hi Jax! Thanks for your review and kind words, they mean a lot to us! We hope you'll be able to use Habitica again in the future at some point.	2021-09-29 15:50:00
544	edc8dcbf-e668-4e75-8e85-1c01371cbb1b	Ma 6 J.S Company	https://play-lh.googleusercontent.com/a-/AFdZucryFe4jIdSX_JfoVy6KoeoPGCjxvuwd9YkLxgBtzuk	M9	5	0	3.3.2	2021-09-27 12:40:38	Thank you for your rating! We're glad to know you like Habitica's features.	2021-09-29 15:50:25
545	0f0541dd-d117-408c-ac44-f5f7f6920813	Niko Alexius	https://play-lh.googleusercontent.com/a-/AFdZucr6FTVwmGkIzXVY5SoI84RkD1Jhc2dW8_UYL2Ftqg	I like the concept and the design. I wish you could get it without all the social stuff too. I know you don't have to do it, but it adds to unnecessary things in the menu for me. However, what made me uninstall it is that you have to be online to check things off and I'm not always online, so that doesn't work for me.	3	1		2021-09-27 11:55:46	Thank you for your review and feedback! Many of our users say the community aspects are helpful for them, but we know not every feature is important to everyone. We plan to add offline mode in the future. In the meantime, if you’d like to let us know what features you’d use the most offline, you can do so via Menu - About - Support - Send Feedback.	2021-09-29 15:52:34
546	363cd840-ffc4-430a-926e-0d66b16b82a8	Da An	https://play-lh.googleusercontent.com/a/AItbvmmCIPlUWTny-HSJUaKxzMvpPcDdHI-EFx6V2btf=mo	Me and my friend are using this to help us stop smoking cigs, we joined a party together and we're currently fighting the dust bunny's, but we think it would be cool if we could create our own party quests where we both share the quest	5	0	3.3.2	2021-09-24 22:55:19	Thanks for your review and feedback! We're happy to hear you and your friend are finding it to be helpful in stopping your smoking habit. We now have an official suggestion and comment form to help us keep track of what features users want the most. You can find it via Menu - About - Send Feedback if you’d like to add your ideas about quests.	2021-09-29 15:58:25
547	ce61ca37-d5fd-4257-9f82-a1a8db4b432a	Ziad Mohamed Atef	https://play-lh.googleusercontent.com/a-/AFdZucpet5Os5n-2GQtaJOsVTxDxA17yM1eLoQGSWvdA6Q	Amazing, simple, easy to use and a great design. Couldn't ask for more, developers made an excellent effort to create this amazing app. 100% recommended if you want to track/create new habits, or remove bad habits. All in all fantastic, 5 stars are well deserved.	5	2	3.3.2	2021-09-24 02:25:03	Hi Ziad, thanks for your review and kind words, they mean a lot to us! If you'd like to share any further feedback, please feel free to reach out via Menu - About - Send Feedback.	2021-03-25 17:57:54
548	be6f6c76-989c-424f-a5c1-bbdaf8782ddf	Ajux	https://play-lh.googleusercontent.com/a-/AFdZucqFlFyK2p0R8YfI0CHg5jnOlhs8RhkKTUwrkOrXlw	this was the best app tracker ever for me. hope one day I get back, it has tons of features and gameplay-like habit tracker. and the community is always helping one another, it's lovely. thanks for everything, Habitica. - Ajux	5	0		2021-09-23 16:15:21	You're welcome, and thank YOU so much for your review! We're happy to hear Habitica's features and community have been helpful for you! If you’d like to share any feedback with us directly, you can do that via Menu - About - Support - Send Feedback.	2021-09-24 15:45:43
549	8732bc6e-26a0-4e6c-8671-a8adb6825915	Jose Morales	https://play-lh.googleusercontent.com/a-/AFdZucrtnSqUoTXfIyeXqbCCrycpWuuXm-8kdtH7wnBbhw	This is a great app however I keep finding myself wanting to put an alarm or set a time. Also, if on the daily task or the to-do list, if you can add subcategories to each tasks that works up to the big task. If your tech people can work on this I would really appreciate it, giving you the full five stars 👍 p.s. I tried to fill your in app suggestion form however its keeps on saying that my email…	4	6	3.3.2	2021-09-23 15:11:20	Hi Jose! Thanks so much for your review. You can create sub-task checklists within a task to break it down into smaller pieces. We now have an official suggestion and comment form to help us keep track of what features users want the most. You can find it via Menu - About - Send Feedback if you’d like to add your ideas about alarms.	2021-09-22 18:04:28
550	ccd2732a-1183-4d40-8547-009bbd2cf38d	Olivia Taloma	https://play-lh.googleusercontent.com/a-/AFdZucqgpLvkl3EGDSLHpt1voBZh66Qbszs4m3kxm5JpD0I	Helped turn my life around. I used to have so much idle time that I got super bored. Nowadays my day is full and fulfilling, I even find that there isnt enough time for everything I want to do. The challenges helped me plan, overcome anxiety, and even have a slimmer waistline. Habitica is a true force for positive change. Highly recommended.	5	0		2021-09-23 15:00:04	Hi Olivia! Thanks so much for your review. We're happy to hear Habitica has been useful for you! Your comments mean a lot to us. If you’d like to share any feedback with us directly in the future, you can do that via Menu - About - Support - Send Feedback. Happy adventuring!	2021-09-24 15:46:57
551	e5d2c84d-d07b-4d8e-8bd3-35ce4e270522	Clevenel Pretorius	https://play-lh.googleusercontent.com/a-/AFdZucrrWjAs-VPre71r1yhvustHtpOW-2JojDA9OhI3qA	Amazing!!! I am so happy I found this App. It has helped me set habits i was really struggling with. A must have for people who have a hard time with time keeping, following through on things and just overall life hehe.	5	3	3.3.2	2021-09-23 02:36:44	Thanks so much for your review. We're happy to hear Habitica has been helpful for you in building habits and following through on tasks! If you’d like to share any feedback with us directly, you can do that via Menu - About - Support - Send Feedback. Happy adventuring!	2021-09-24 15:49:22
552	54b1a400-6d52-468a-9748-bd1b60ae8301	Universal Tips	https://play-lh.googleusercontent.com/a-/AFdZucqM4zas4zOtQdkydQJEXof5BniaA3517d-_YYDB_A	Best app to manage routine tasks	5	0	3.3.2	2021-09-22 03:21:43	Thanks so much for your review. We're happy to hear Habitica has been helpful for you! If you’d like to share any feedback with us directly, you can do that via Menu - About - Support - Send Feedback.	2021-09-22 18:04:45
553	fa6ca096-e505-4a32-8545-b2f9fa2fe911	Greg Moore	https://play-lh.googleusercontent.com/a-/AFdZucqn_tXiYD6gGuLD0l3_scUwuGViVXVsIZqpCF5gBdk	Best app I have ever downloaded.	5	0		2021-09-22 01:01:35	Hi Greg! Thanks so much for your review and high praise. We're happy to hear Habitica has been so helpful for you! If you’d like to share any feedback with us directly, you can do that via Menu - About - Support - Send Feedback.	2021-09-22 18:05:14
554	211aaa6b-4912-46d0-84bc-d894282bca97	Даниил Мушрук	https://play-lh.googleusercontent.com/a-/AFdZucrMdyvMKsNiVbdYP_2aN1QlVsd8xRNm3D2ryTDMow	После скачивания приложения моя производительность выросла, лайк :D	5	0	3.3.2	2021-09-21 18:38:04	Thanks so much for your review. We're happy to hear Habitica has been helped you be so productive! If you’d like to share any feedback with us directly in the future, you can do that via Menu - About - Support - Send Feedback.	2021-09-22 18:07:07
555	e8a2ba58-e951-4868-9ad7-31eeb78f9b38	I cannot come up with anything	https://play-lh.googleusercontent.com/a/AItbvmlro4NxCjwcHQpWMx2-R5Gh_ul5s0_NPkLxve-l=mo	This app is amazing. I am terrible at time management. So, I hate things like planners. Then I decided to just do checklists instead. Which had been proven effective. However, I wanted something I can use on my phone instead of my notebook as a checklist. Luckily enough I found this application. Thanks Habitica. You make life for a lazy student and language enthusiast so much easier! ¡Gracias Hab…	5	21	3.3.2	2021-09-20 20:33:11	Thanks so much for your review. We're so happy to hear Habitica has been useful for you, especially with your studies! And if you'd like to help with our translation efforts in the future, you can learn more here: https://habitica.fandom.com/wiki/Guidance_for_Linguists	2021-09-22 17:40:18
556	44f9ee52-78f9-414d-80da-074487007d05	Heather Ann Lewis	https://play-lh.googleusercontent.com/a-/AFdZucriJ61GF3jzLbwt7HvWXU9YuUlzwveFl1D-44shBg	Floor so all cm A ex go DG an ad also XL XL day so so cm XL ya JJ ha ha for half of is it'll DJ man ask so so all all XL XL idk so XL zzz tapas LLC two gal	3	0	3.3.2	2021-09-20 20:18:17	Hi Heather! Thank you for downloading Habitica. Let us know if we can improve your experience with it in any way.	2021-09-22 17:41:02
557	09085882-6eb3-4166-8854-d67ebe648fdc	Dubovyy	https://play-lh.googleusercontent.com/a-/AFdZucrtpXGjeYfFtdSDadR1FFFnmp54rk-CVxIdLSaEbQ	Imo, Habitica stands out among other habit trackers because of its party system. I invited other friends to use Habitica with me to form a party, and for the last 2 months we became productivity monsters. I do think the game is a bit unbalanced tho. The mage is BY FAR the best class. Also, I think there are just too few questlines, so we pretty much beat the "game" in 2 months. Habitica is amazin…	4	13	3.3.2	2021-09-20 15:43:49	Hi! Thanks for your review and feedback! We're glad to hear you and your friend are enjoying Habitica so much! We do regularly create new pets, potions, equipment, backgrounds, and quests, but we welcome more suggestions. If you'd like to send us your ideas, we have an official suggestion and comment form: Menu - About - Send Feedback	2021-09-22 17:50:43
558	4adfcd51-b4c5-4162-b4fa-e540fee8947d	Jm.c Entico	https://play-lh.googleusercontent.com/a/AItbvmn0PcCcWrNT-xtnn3FBV72ax8EXn9mb5tyOgajatA=mo	honestly I don't really review stuff. but this app helps me a lot, it helps me to self reflect and be productive. it also helps me remember the things I forgot to do. What a lovely Idea devs.	5	1	3.3.2	2021-09-20 01:53:51	Thanks for your review and kind words. It means a lot to us to know you're finding Habitica to be so helpful! If you'd like to share any further feedback in the future, please feel free to reach out via Menu - About - Support - Send Feedback.	2021-09-22 17:53:39
559	d0a86e57-9a2c-45ad-97bc-3ec26bd255a1	Tori Cook	https://play-lh.googleusercontent.com/a-/AFdZucqWyQz4QJgaf4982bcw1Pv6sRo5cvAAHa_wYANtcQ	Lovely habit tracker with a fun rpg twist	5	0	3.3.2	2021-09-19 18:25:57	Hi Tori! Thanks so much for your review. We're happy to hear Habitica has been fun and helpful for you in your life's adventures! If you’d like to share any feedback with us directly, you can do that via Menu - About - Support - Send Feedback.	2021-09-22 17:54:37
560	e0afc227-6bd4-417e-8fca-62f1c6587a01	Zaydu123	https://play-lh.googleusercontent.com/a-/AFdZuco4xvORJ8qNC96TFlUKVxf7MTfL-cDWrMmywKqGkjc	I've tried a LOT of productivity apps and noting has EVEN COME CLOSE to habitfy. This app is amazing. You can track your good habits, bad habits, you can set daily tasks, you can have to do's. You can buy pets, earn them, or hatch them with eggs. You need to be productive to earn money to feed your pets. You can buy clothes. You can customise the look of your avatar. You can join guilds of produc…	5	13	3.3.2	2021-09-19 17:21:55	Thanks so much for your review and list of features you enjoy. We're happy to hear Habitica has been so helpful for you! If you’d like to share any feedback with us directly in the future, you can do that via Menu - About - Support - Send Feedback. Happy adventuring!	2021-09-22 17:56:52
561	a47b184f-b0e0-4394-86de-1db59e1db4c4	Jenna Thorne	https://play-lh.googleusercontent.com/a/AItbvmn0Mn1B4dfdVwEH2vUEVaVd8CmeynD9noCK5gbi=mo	I think it would help lots of people, however for me it was too complicated to understand properly. Still worth a try, just not for me :) Oh also, there are very few customisation options for your avatar, they don't even have any unnatural hair colours and they only have a few styles	3	5	3.3.2	2021-09-18 13:40:32	Hi Jenna! Sorry to hear Habitica isn't what you're looking for. We do have many avatar customization options including dozens of hair styles and the following hair colors: red, orange, yellow, green, purple, blue, gray, black, brown, and rainbow.If you'd like more info, you can check the Habitica Wiki: https://habitica.fandom.com/wiki/Habitica_Wiki	2021-09-22 17:37:35
562	c240b705-d1a7-4f04-b2b0-b3cf5a0ef896	Purav Tapahliya	https://play-lh.googleusercontent.com/a/AItbvmk4RVY858P31Hr30-R5H9R5OZmzFDa2l3U6qvw5=mo	P lookup,a	1	0	3.3.2	2021-09-17 17:16:41	Hi Purav! Thanks for downloading Habitica. Let us know how we might be able to improve the experience for you. If you’d like to share any feedback with us directly, you can do that via Menu - About - Support - Send Feedback.	2021-09-22 17:09:58
563	71b7e369-8d79-48cc-8184-4ca3ce1799b4	Lex. Mex	https://play-lh.googleusercontent.com/a-/AFdZucqdeqqRfiRJH9Bit47KXoqY6Zx2EtKkSaxzm36ndA	So far I like the app a lot. It's motivating for some reason. And gets me to do tasks I would have other wise procrastinated on. It gives a "reward" aspect with positively reinforces the behavior. Truly helps me.	5	0	3.3.2	2021-09-17 11:55:07	Thank you for your review and rating. We're happy to hear Habitica has been so helpful for you! If you’d like to share any feedback with us directly in the future, you can do that via Menu - About - Support - Send Feedback.	2021-09-17 15:06:01
564	ccff5e6a-abd0-43bf-ab9f-6bc316c0f4b8	Kshitij Sahu	https://play-lh.googleusercontent.com/a-/AFdZucogQFs-9z9n9m7LJqcHjQTf94LsJVMGcFjisIc0	Why this is 8bit	3	0		2021-09-17 03:58:49	Thanks for your review. Our artwork is done by volunteers from our community and is intended to evoke a retro style.	2021-09-17 15:04:54
565	15e28d9a-01ed-4d30-bfe8-6b61b0afddea	Shaun Ingram	https://play-lh.googleusercontent.com/a-/AFdZucrwRQSiCoIPvIfpFrKER8GuFrciphaUijKV7qOXyg	My wife and I have been playing together for over 2 years now. Clearly a passion project. Grateful for the developers!	5	0	3.3.2	2021-09-16 04:06:54	Hi Shaun! Thanks so much for your review. We're happy to hear Habitica has been helpful for both you and your wife! If you’d like to share any feedback with our developers directly, you can do that in the future via Menu - About - Support - Send Feedback.	2021-09-17 15:01:58
566	7fd6f855-47d6-49e6-b726-66e762bf30af	Roland A	https://play-lh.googleusercontent.com/a-/AFdZucriOsJt1elVwdBkXUsnPIPoVnlow7oLbvqRuN1G0g	Absolutely amazing! I had a really good time with this app! 10 out of 10 would reccomend!	5	0	3.3.2	2021-09-16 02:33:35	Hi Roland! Thanks so much for your review. We're happy to hear Habitica has been helpful for you! If you’d like to share any feedback with us directly, you can do that via Menu - About - Support - Send Feedback.	2021-09-17 15:00:57
567	e1cf0658-b8b8-4180-9900-5de5706a05fe	Wabay Steele	https://play-lh.googleusercontent.com/a-/AFdZucpYzPsAx5-qwmwU0BetMXQgWPrUM71NF_XFOoYV	I really wanted to like this app, but honestly the set up and getting used to it didn't work for me.	2	0		2021-09-15 16:48:26	Hi! Thanks for giving Habitica a try. Sorry it wasn't the right fit for you.	2021-09-17 14:58:20
568	9ffdb97e-b927-47a3-95d1-a6ab00be8b9f	Joshua Holdaway	https://play-lh.googleusercontent.com/a-/AFdZucqrsZZs_JenpqaXeflQw20KOsCIGKzEfG-kwy9J4Q	This has been a big help bettering myself and my son plays in my party to keep me honest. Subscribed after a week of playing to support the devs for their wonderful app.	5	0	3.3.2	2021-09-14 21:32:20	Hi Joshua! Thanks so much for your review and your support. We're happy to hear Habitica has been helpful for you and that your son helps you stay accountable! If you’d like to share any feedback with us directly, you can do that via Menu - About - Support - Send Feedback.	2021-09-15 15:50:52
569	a79fa6e6-1b8d-4a87-870b-ab63b8d48a81	spacey moonstrider	https://play-lh.googleusercontent.com/a/AItbvmkSIDfG_cqavj1dOn5BU5yvXkP-orhFxljgmyIk=mo	One of the best apps I've ever used. It doesn't just inspire productivity but also enables me to keep track of what needs to be done efficiently, thus allieviating a ton of stress. So rewarding, and love all the customisation options. I think everyone could benefit from trying this one. I'd like to be able to categorise my tasks in some way, colour coding would be awesome in future updates if pos…	5	67	3.3.2	2021-09-14 19:54:44	Thanks so much for your rating and review. We're happy to hear Habitica has been helpful for you! If you’d like to share any feedback with us directly, you can do that via Menu - About - Support - Send Feedback.	2021-09-15 15:49:55
570	b3da74e7-43e1-4326-af5d-2e62ba0a4e35	Sofiya	https://play-lh.googleusercontent.com/a-/AFdZucoHfG9Ji3unzBwS24f32swjV5mfP38KuI64qU8x	It would be nice to change the date settings to DD/MM/YYYY for the Todo tasks.	4	0	3.3.2	2021-09-14 11:44:31	Hi Sofiya! Thanks for the rating. You can change the date format on the website version, but we haven't implemented it for Android yet. If you'd like to let our developers know it is a feature you want, please go to Menu - About - Send Feedback	2021-09-15 15:42:09
571	60d480e8-d054-4bc9-9920-e15ca56539ef	Soroush Azadvari	https://play-lh.googleusercontent.com/a-/AFdZucqZJhUojtk3krL_r06kxEAyBqn_sPRufUxt3ATM8g	The idea is perfect but unfortunately I am experiencing bugs. The hints show up every time I switch between tabs and I couldn't find a way to stop it. After making my lists and habbits, when I clicked the icon to tell the app that I have done the task, a spinning circle showed up and it's still there. Restarting the app and even the phone didn't help. My internet connection is ok and I don't know…	3	3		2021-09-14 09:44:46	Hi Soroush! Thanks for your review, but we're sorry to hear you're experiencing problems. You can help us fix any bugs you encounter by reporting them directly via Menu - About - Support - Report a Bug or sending us a message at mobile@habitica.com	2021-09-15 15:48:42
572	adc66279-aacb-426f-9647-8513eeccf431	Clive Do Couto	https://play-lh.googleusercontent.com/a-/AFdZucryFDQ7-uggIFBg6ZrS5x1ejdZVI7ptAMn10QN0Sw	Omg I love this app so much. For some reason I'm so pushed and motivated to actually do what I need to do now thank you alot developers for making such a masterpiece This app is defined underrated because you alot deserve all the praise yall get.	5	0	3.3.2	2021-09-14 08:18:56	Hi Clive! We appreciate your review and are happy to hear Habitica has motivated you! If you’d like to share any feedback with us directly, you can do that via Menu - About - Support - Send Feedback.	2021-09-15 15:46:53
573	c346365c-c69b-4b56-a138-973da8895b5b	Prophet	https://play-lh.googleusercontent.com/a-/AFdZucqtINUGTF64vSpeHhnsPPSxuFPCNvx3jYcnqK4Dpw	I love the concept and this serves very well as a motivational tool. Only improvements i can think of: i wish you could set different levels for the +/- on the habits screen. Like gaining small when you follow a good habit and losing big when you fail, etc. to provide greater motivation to follow good habits and prioritize more. I find it hard to find a comfortable difficulty for some tasks, so m…	4	41	3.3.2	2021-09-14 04:00:16	Thanks so much for your review. We're happy to hear Habitica has been helpful for you! We now have an official suggestion and comment form to help us keep track of what features users want the most. You can find it via Menu - About - Send Feedback if you’d like to add your idea.	2021-09-15 15:45:25
574	ff830d63-47c5-43d7-b58d-7519b79ed1c8	Marcellina Carissa	https://play-lh.googleusercontent.com/a-/AFdZucoQ1MlPSXtqOlJGr3j4EaKnAMGkEIiPI0H2j7-oxw	Nice, help me to create nice habits and checking out my task of the day	5	0	3.3.2	2021-09-14 01:57:50	Hi Marcellina! Thanks for your review. We're happy to hear Habitica has been so helpful for you! If you’d like to share any feedback with us directly, you can do that via Menu - About - Support - Send Feedback.	2021-09-15 15:44:28
575	e43d8b37-c8a0-4343-90cf-e0da1d5ef4c6	Zack Frantz	https://play-lh.googleusercontent.com/a-/AFdZucqRgakSc1oI6gnUeW8IWbpzNIZvkxV3OZpyXOm_5w	At the time of writing this review, I just hit level 11 and selected rogue as my class, as someone who suffers from ADHD and bipolar type 2 depression, this app is really good for holding me accountable, we as human beings want that instant gratification that we cannot see when we do tasks for a long time, but this app helps give you that instant gratification, which keeps you doing your habits. …	5	106	3.3.2	2021-09-13 20:25:43	Hi Zack! Thanks for your review and kind words; they mean a lot to us! We're so glad that you're finding Habitica to be so useful and gratifying. If you'd like to share any feedback with us in the future, please feel free to reach out via Menu - About - Support - Send Feedback.	2021-09-15 15:43:39
576	d7d0a844-2602-4bc9-ab1d-56a78f29f9c4	Grace E	https://play-lh.googleusercontent.com/a-/AFdZucoBZ7Kg9Et_-GlqQIc4GDkUF1Y4lp0igd93OK5-7CM	Cool concept, but it's not rewarding enough for me. The act of checking off habits is very satisfying, but I have no desire to upgrade my extremely bland pixel character with any of the severely limited and boring equipment or rewards... not enough dopamine or creative design in my humble opinion	2	10	3.3.2	2021-09-13 15:49:47	Thanks for your review. We're sorry to hear that the many hundreds of equipment items, backgrounds, pets, and customization options weren't to your liking. Thanks for giving Habitica a try.	2021-09-15 15:38:03
577	2fc2ba53-b31d-46c5-9232-e4eea35c62ac	Muhammad Dwi Krisbiantoro	https://play-lh.googleusercontent.com/a-/AFdZucoAu2uHfcCARPWzl23nXAMeJaG8kFmwNK6zXzfd2Q	I like this	5	0	3.3.2	2021-09-12 20:51:19	Hi Muhammad! Thank you for your review. We're happy to hear Habitica has been helpful for you! If you’d like to share any feedback with us directly, you can do that via Menu - About - Support - Send Feedback.	2021-09-15 15:34:25
578	4048d3c7-394e-47d2-b17c-110f6477eab8	Natalia Mi	https://play-lh.googleusercontent.com/a-/AFdZucpH7fNIvVsOa7oIG0D5B9MGrXFpUATHf-sranac_B0	I LOVE THIS APP SO MUCH I COULD GIVE IT 20 STARS. BLESS U, CREATORS	5	1	3.3.2	2021-09-11 15:14:46	Hi Natalia! Thanks for your review and kind words; they mean a lot to us! If you'd like to share any feedback in the future, please feel free to reach out via Menu - About - Support - Send Feedback.	2021-09-15 15:30:35
579	48dc0cc2-7f9b-4a97-992a-1d8aaaffa1c4	Pratyush Sharma	https://play-lh.googleusercontent.com/a-/AFdZucrfeC88AWf9SUZ58zg_23H_FuB5O5iqM-wlojcyyQ	The concept of this app is really nice. You can gamify habits, dailies and to-do lists with it. The UI is easy to navigate through and, it is clean and simple. It is helping me a lot in developing new habits and keeping up with my daily tasks. The fact that it is open-source is also amazing.	5	18	3.3.2	2021-09-10 16:44:54	Thanks so much for your 5-star review. We're happy to hear Habitica has been helpful for you! If you’d like to share any feedback with us directly, you can do that via Menu - About - Support - Send Feedback.	2021-09-10 20:39:00
580	96f017ed-2388-452a-b469-24e44244c10e	Scott Davis	https://play-lh.googleusercontent.com/a-/AFdZucreA08D_1yVAb62ggVqdI7fsfLGUnwE0F8YwOLkzQ	Neato!	4	0	3.3.2	2021-09-09 04:38:26	Hi Scott! Thanks so much for your review. We're happy to hear you are enjoying Habitica! If you’d like to share any feedback with us directly, you can do that via Menu - About - Support - Send Feedback.	2021-09-10 20:37:40
581	64c871b0-4105-480c-a82b-050ee5869388	Mario	https://play-lh.googleusercontent.com/a/AItbvmkL_KK1zIyD2GkPrTlgmNxxfHCZNoQCW9XnpPgo=mo	I use the app and website all the time, but app it loses data when your connection isn't strong. There's supposedly some "pending" state but it doesn't work correctly	3	5	3.3.2	2021-09-08 18:07:01	Hi Mario! Sorry to hear about this issue with the app losing data ! If you'd like to send us more information to help us resolve it, you can do so via Menu - About - Support - Report a Bug.	2021-09-10 20:36:17
582	652d7aad-829c-4008-b86d-c52e555f9ba1	YTManaged BruceLee	https://play-lh.googleusercontent.com/a-/AFdZucpXhJtCYt0vsQdJNBBbSzemdcTAAJIq11LkuPPyig	Wanted to delete my account. There is no option to do so. Don't like how the app is set up.	1	0		2021-09-08 10:00:22	Hi! Thanks for giving us a try. You can delete your account by going to Menu - Settings - Authentication. You may email us at admin@habitica.com if you need any further assistance.	2021-09-10 20:34:15
583	f8424966-fe2d-427f-a34d-63add6fec012	Wyatt Pugliese	https://play-lh.googleusercontent.com/a-/AFdZucpaFG8UOv5I1_pn0x3kgkwAAZcgDvFij9NEtRS9NA	Felt like they were trying to steal my data when installing. I invest in crypto.	1	1		2021-09-07 22:44:32	Hi, Wyatt. We're sorry you felt hesitant about installing the app. We don't serve ads or sell user information. You can read our privacy policy here: https://habitica.com/static/privacy If you have any questions, feel free to contact us at admin@habitica.com	2021-09-10 20:24:49
584	100c0e72-43a3-4af5-9b87-97c56e761ae3	Nathaniel Maranan	https://play-lh.googleusercontent.com/a-/AFdZucoi5ksz7IoWSLFJB2cPhpLtXiE_HfzeLLXGmvLyKQ	This is a LIFE-CHANGING APP! I love this! I wish the devs all the best and hope for more wonderful additions in the future. Good job!	5	0		2021-09-07 14:03:25	Hi Nathaniel! Thanks for your review and kind words, they mean a lot to us! If you'd like to share any further feedback, please feel free to reach out via Menu - About - Support - Send Feedback.	2021-09-10 20:29:19
585	8bc7f2ee-367d-4bb1-892d-993f6040dee6	Tom Nimanju	https://play-lh.googleusercontent.com/a-/AFdZucpzxFWdlGz4IxqT6HkX_59whbcuF9VXQ6yPhkDIle4	Bloated, not well designed, has bugs. I couldn't even register because all possible names are already taken. This takes me back to early 2000s Internet	4	0		2021-09-07 09:30:35	Hi Tom! Our artwork is done by volunteers from our community and is intended to evoke a retro style. Sorry it's not your cup of tea! Thanks for taking the time to leave a review, and sorry to hear you encountered a bug! We’d love to take a look at it if you want to submit it via Menu - About - Support - Report a Bug.	2021-08-06 13:12:51
586	027698aa-d9b3-4eb7-b518-e08f09409af2	Alexander Almeida	https://play-lh.googleusercontent.com/a-/AFdZucrCvvze-0VS9p-gGD0Z-kkP7vDwLNZd38GCmm_-CC0	I love this app! It would be great if there was a list widget with all my habits, just like with dailies and to-do	4	0	3.3.2	2021-09-07 01:19:00	Thanks so much for your review. We're happy to hear Habitica has been helpful for you! We now have an official suggestion and comment form to help us keep track of what features users want the most. You can find it via Menu - About - Send Feedback if you’d like to add your ideas.	2021-09-10 20:26:15
587	3c0b6d33-5785-40cf-83fe-5207ad3fdd30	Dom Y	https://play-lh.googleusercontent.com/a-/AFdZucpyURzy9nVG7IXIlOfCd31ZYLNi115N5yvDrYxKZw	good as	5	0		2021-09-06 09:22:21	Hi Dom! Thanks so much for your review. We're happy to hear Habitica has been helpful for you! If you’d like to share any feedback with us directly in the future, you can do that via Menu - About - Support - Send Feedback.	2021-09-06 14:50:28
588	bcb11aae-15c9-4fde-9bc7-43d3c3575035	trung pham	https://play-lh.googleusercontent.com/a/AItbvml-zVOs7e2rMS-ssvkAPCmwUl4DDaVxsLJX7Htm=mo	I don't know why but the lack DD/MM/YY time system make me uncomptable when using this app.	4	0	3.3.2	2021-09-05 10:23:54	Thanks for the review and for letting us know. You can change the date format in the website version of Habitica under settings. If you want to suggest we have the same option for the app, you can contact our devs directly via Menu - About - Support - Send Feedback.	2021-09-06 14:57:48
589	746c05b9-20e4-4cf2-ae1f-61e666215ef1	Jessica McCarthy	https://play-lh.googleusercontent.com/a/AItbvmn3qvqIUCe9gPIYkmU0hipoXScIMXSPOKvPS8w5=mo	Love this app, it's really cute and fun to use and is genuinely helping me build good habits. I absolutely LOVE the wide range of pets available, and couldn't believe you can even get pet nudibranchs on one of the quests!! This gave my nerdy little scuba diver heart such joy. Thanks for an awesome app guys! P.s. it's totally worth subscribing, unlocks access to so much more awesomeness	5	14	3.3.2	2021-09-05 08:51:34	Hi Jessica! Thanks so much for your review. We're happy to hear Habitica has been helpful for you in building habits and that you enjoy the variety of pets to collect! If you’d like to share any feedback with us directly (or make suggestions about other pets you might like to see), you can do that via Menu - About - Support - Send Feedback.	2021-09-06 14:50:10
590	307c2ee9-dd10-4c89-9964-21b0cacdca89	AJ	https://play-lh.googleusercontent.com/a-/AFdZucqODhrbFpsw-dkS_yPKTAah7sngeG82gugBZJBSAw	Didn't all think this will work but it definitely does. I need more coins to play video game so I do something to earn it. I wish it had always been this easy.	5	0	3.3.2	2021-09-04 15:12:56	Hi AJ! Thanks so much for your review. We're happy to hear Habitica has been helpful for you. Keep checking off those tasks to earn coins for your video games! If you’d like to share any feedback with us directly, you can do that via Menu - About - Support - Send Feedback.	2021-09-06 14:48:30
591	663acbd4-a6a1-4f61-8f48-e42f9d6d4bcd	Virgil Elliott	https://play-lh.googleusercontent.com/a-/AFdZucqsSbY2GnaI3nyZg_MGNqw_OPuukWnDCSzyuxf9uVA	I just installed this app and it is already amazing!!! I suggested it to my brother also.	5	0	3.3.2	2021-09-03 02:39:49	Hi Virgil! Thanks so much for your review. We're happy to hear Habitica has been helpful for you and that you've shared it with others in your life! If you’d like to share any feedback with us in the future, you can do that via Menu - About - Support - Send Feedback.	2021-09-03 15:06:25
592	9b56c1c4-0083-4c02-8f0e-7a6a1db85324	Sarah Spierling	https://play-lh.googleusercontent.com/a-/AFdZucqiY5n8DEdK8hf2Q7Fg5_imRRlsdSaqMwbiQjEEkg	I actually got way more productive and also started to drink more water out of habit and not just when I saw it on the app. Definitely worth trying, I love it.	5	0		2021-09-02 22:56:03	Hi Sarah! Thanks so much for your review. We're happy to hear Habitica has been so helpful for you. Keep drinking that water! If you’d like to share any feedback with us directly, you can do that via Menu - About - Support - Send Feedback.	2021-09-03 15:08:21
593	1d839981-bb93-4360-a20b-97a5e0568511	Kristen Tabor	https://play-lh.googleusercontent.com/a-/AFdZucrK3tcFvIkPhwf1EpRIze7J2-xRZEmlJY9hZ_zh	I downloaded this bc I thought it was an interesting idea, but after researching it's privacy policy, I can't feel comfortable with it at all.	1	2		2021-09-02 00:50:29	Thanks for giving us a try. Your privacy and data are important to us, so we abide by GDPR guidelines and do not sell advertising. You may email us at admin@habitica.com if you would like to let us know what part of the privacy policy you are not comfortable with.	2021-09-03 15:12:29
594	3abc2358-0bb7-435a-92ab-3e2b7cea0e8e	akadapo	https://play-lh.googleusercontent.com/a-/AFdZucoURZR7IAj2_s0Gg5d7IuRWK2BtfLAya0fz9wm4ew	Source of motivation for good habits	5	0	3.3.2	2021-09-01 19:47:06	Thanks so much for your review. We're happy to hear Habitica has been helpful for you! If you’d like to share any feedback with us directly, you can do that via Menu - About - Support - Send Feedback.	2021-09-03 15:14:17
595	1114733a-9318-432e-a552-2c8f99b04a5d	Mehdi	https://play-lh.googleusercontent.com/a/AItbvmmFfzSbdqZtQgHGtwugYAbGUmI7Z-cDYVBr0l4Xonc=mo	This app is incredible!! I have ADHD and its the only thing I've found that actually helps not only to start new habits, but the daily to do lists and daily, weekly or monthly task lists are incredible. I use them for everything from remembering when to clean my bathroom to brushing my teeth daily. The gamification aspect is incredibly powerful, as not only does the upgrading give a nice dopamine…	5	21	3.3.2	2021-09-01 07:07:08	Hi Mehdi! Thanks for your review and kind words. They mean a lot to us! We're glad that Habitica has been fun and useful to you. If you'd like to share any further feedback, please feel free to reach out via Menu - About - Support - Send Feedback.	2021-09-01 19:26:42
596	68f26fab-8e5b-4196-b9ca-65f1c7983563	Ana Maria Alvarez	https://play-lh.googleusercontent.com/a-/AFdZucpYyS036X2TSEXzesab_KOoVIT_BGA2Anu0FuctSg	Love this app. I have ADHD and this app helps me organize my life, do my daily tasks, organize my to-do list, and quit or do unwanted habits. I recommend this for anyone who struggles to organize themselves and complete simple day to day tasks because of ADHD or any other disability or just for fun! Because you like pixelated games.	5	9	3.3.2	2021-08-31 15:57:40	Thanks for your review and kind words; they mean a lot to us! We're happy to hear you're enjoying Habitica and finding it useful. If you'd like to share any feedback with us in the future, please feel free to reach out via Menu - About - Support - Send Feedback.	2021-09-01 19:29:37
597	e865acdf-c7d3-4a2b-b14a-b4b0baabd072	shadow trevino	https://play-lh.googleusercontent.com/a-/AFdZucr3wA9yEd6K6vzMku7eiIP1CnNqdUliVMNx_EXPNw	I've honestly enjoyed this game and actually have been keeping up with my habits because of it, however losing health and levels and gold when my health depletes kind of takes me out of the game and feels like all that progress I did for the week was for nothing, I understand losing health during a quest but why do I lose health when all I do is check off my habits and stuff?	4	5	3.3.2	2021-08-30 13:02:31	Thanks so much for your review. We're happy to hear Habitica has been helpful for you! You should only be losing health when you fail to check off habits and tasks, not when you accomplish them. If you're losing health and gold when you shouldn't be, let us know via Menu - About - Support- Report a Bug and the team will look into it.	2021-09-01 19:32:45
598	bd089a38-32c0-4e6d-91d6-c386512e0efe	Wade Perkins	https://play-lh.googleusercontent.com/a-/AFdZucpGTKeN4uZ8PdEXzXqeerrjyPjjmtagniMhP3G6	Pretty good for keeping on track of daily tasks. Needs more charactor customization :p	4	0	3.3.2	2021-08-30 06:47:22	Hi Wade! Thanks so much for your review. We're happy to hear Habitica has been helpful for you! There are hundreds of ways to customize your avatar, but if you'd like to suggest new ones, you can do that via Menu - About - Support - Send Feedback.	2021-09-01 19:34:13
599	f1177ca1-257a-414b-be81-37372f7363f3	diego caples	https://play-lh.googleusercontent.com/a-/AFdZucphzFOEjUJI8ZSW3TlwlUZt2sbMEV12RNFuzJA2	I have never been so productive!	5	0	3.3.2	2021-08-30 01:08:54	Hi Diego! Thanks so much for your review. We're happy to hear Habitica has been so helpful for you! If you’d like to share any feedback with us directly, you can do that via Menu - About - Support - Send Feedback. Happy adventuring!	2021-09-01 19:34:42
600	167d68c2-b08e-4640-8c4c-68b80a6cb107	The Green Ninja	https://play-lh.googleusercontent.com/a-/AFdZucrBe3v8rNida_aJ-T24zfi10bEcFxZ_OKm7mz7GYw	Best way to be organized. I love this app, this app helps me keep track with my busy schedule and have some fun aswell.	5	0	3.3.2	2021-08-27 15:44:46	Thanks so much for your review. We're happy to hear Habitica has been useful and fun for you! If you’d like to share any feedback with us directly, you can do that via Menu - About - Support - Send Feedback.	2021-08-25 13:04:59
601	38a714b3-6cd2-4ee4-bd4a-bfdfb757277b	Andrés Alejandro Salazar Corte	https://play-lh.googleusercontent.com/a-/AFdZucr7DO8eU42BrWb5MWTbiYgRyf2f3kA4at6-jD4bqw	Me encanta el diseño de la app. Es muy creativa y extrínseca para comenzar buenos hábitos. Me gustaria que tuviera un widget de inicio para marcar tareas desde la pantalla pero de todos modos funciona genial. La recomiendo	4	0	3.3.2	2021-08-26 17:34:29	Thanks so much for your review. We're happy to hear Habitica has been useful for you in developing good habits! We now have an official suggestion and comment form to help us keep track of what features users want the most. You can find it via Menu - About - Send Feedback if you’d like to add your idea about the home widget.	2021-08-29 19:45:58
602	4e1b728b-f557-449a-8813-81de086f2e3f	Larrah St Pierre	https://play-lh.googleusercontent.com/a-/AFdZucpFA62yQx0S5YaZNZW26dFMNkfxU641xXL7VvwVhQ	Amazing app for gamers that need motivation to complete tasks. Your daily tasks are modeled on Health and XP and it makes chores and forming healthy habbits engaging and rewarding	5	0	3.3.1	2021-08-26 15:51:33	Hi Larrah! Thanks so much for your review. We're happy to hear Habitica has been helpful and rewarding for you! If you’d like to share any feedback with us directly in the future, you can do that via Menu - About - Support - Send Feedback.	2021-08-29 19:46:32
603	b78698ac-7654-405f-857a-f38c353ea93e	Daniel	https://play-lh.googleusercontent.com/a-/AFdZucqTk8qbWVFkfw1G084gMqluLy5mxV2H7qwg4PfARA	Great App! Really good for making habits and tasks easy in an RPG Style	5	0	3.3.2	2021-08-26 00:53:40	Hi Daniel! Thanks so much for your review. We're happy to hear Habitica has been helpful for you, and we're glad you like the RPG gamification! If you’d like to share any feedback with us in the future, you can do that via Menu - About - Support - Send Feedback.	2021-08-29 19:42:26
604	9ede0cf9-5bcf-436f-ab18-04d00f6698b5	Amanda K.	https://play-lh.googleusercontent.com/a-/AFdZucoaUeqAUMsV8VVAZS2Siqr8jYtp7HMAffLnb4j-yQ	I love using this app. It seems to be the only option that can assign points for completing each habit, daily task and to-do and then set up your own rewards to use those earned points. I needed more motivation to get stuff stuff, and this gamifies things for me. However, I would really like a way to reuse completed to-dos. I want to be able to click on the completed task and then save it to have…	4	67	3.3.2	2021-08-25 13:14:22	Hi Amanda! Thanks so much for your review. We're happy to hear Habitica has been helpful for you! We now have an official suggestion and comment form to help us keep track of what features users want the most. You can find it via Menu - About - Send Feedback if you’d like to add your idea about being able to easily copy old to dos.	2021-08-25 12:59:25
605	264e47e7-ac47-4cab-b0d0-ab324082d418	Shuang Li	https://play-lh.googleusercontent.com/a/AItbvmldO3RO5SMK3smlXOxBTqGdoB12YlzSocj4KZnD=mo	It's working, For now anyway Edit: still working, really is improving my life a lot.	5	1	3.3.2	2021-08-21 09:31:45	Thanks so much for your review. We're happy to hear Habitica is working for you! If you’d like to share any feedback with us directly, you can do that via Menu - About - Support - Send Feedback.	2021-08-11 16:14:16
606	e5923d8e-cf07-4e2e-b2d5-e03325f00bb2	Tildaティルダ	https://play-lh.googleusercontent.com/a-/AFdZuco3uGeBUi-uofxh6_UauuhqN7NMjc3zzrKAEr6m_w	I expected just a normal to do list but with a little pixel character and a health bar. They have actually laid down a lot of though, both into the tasks part and the game part and it feels very polished. A very welcome surprise.	5	4	3.3.2	2021-08-20 19:56:39	Thanks so much for your review. We're happy to hear Habitica has been helpful for you and that you like the pixel art and gamification! If you’d like to share any feedback with us directly, you can do that via Menu - About - Support - Send Feedback.	2021-08-25 13:07:17
607	d8ad5035-deee-4fc3-9939-2cbffa26a860	Anna Bessert	https://play-lh.googleusercontent.com/a-/AFdZucoYU8CVITsVdUaIiXD5Q2wxG-sINdP5pS6zZdNsIA	Motivational, fun and brilliant app with pixellated images and an old RPG feel. It helps you actually finish your to-do list.	5	1	3.3.2	2021-08-20 14:57:31	Hi Anna! Thanks so much for your review. We're happy to hear Habitica has been helpful for you and that you're enjoying the RPG feel with our pixel art! Our art is created by many talented volunteers. Happy adventuring!	2021-08-25 13:09:03
608	f9a0d343-bc20-42a7-a07a-7af01f35dde8	Joey Kee	https://play-lh.googleusercontent.com/a-/AFdZucqcklrAuvRttUn-bfbp02L1Wv61j3Uh3y1lSDoqYA	My habit builder app. The game rpg part is an add on but I use it mainly to track my habits and daily to do lists.	5	1	3.3.2	2021-08-20 10:38:01	Hi Joey! Thanks so much for your review. We're happy to hear Habitica has been helpful for you! If you’d like to share any feedback with us directly, you can do that via Menu - About - Support - Send Feedback.	2021-08-20 13:53:00
609	4692094e-1011-4e1b-b348-47617116b647	Conrad Solinski	https://play-lh.googleusercontent.com/a-/AFdZucql6hKdv0jt2QuqnakJ-F8ajrA0irb9yeqg8L_q	I really like the concept. It's presented in a way that allows things that you may not want to do feel a little bit more like an activity than a burden upon your shoulders. It's also really good to have a visual representation of what you've accomplished to give you a better sense of "Wow. I DID that". The only thing I can think to change as of writing this is that it's a little annoying that you…	5	16	3.3.1	2021-08-19 23:04:18	Thanks so much for your review. We're happy to hear Habitica has been helpful for you and that you're finding it fun! You're right that we don't have a challenge search feature on the app the way we do in the web version. Feel free to suggest it to our developers via Menu - About - Send Feedback.	2021-08-20 14:11:47
610	c8c2d8e9-5a0c-4dda-8bf7-08f29abe91c0	Family Silvan	https://play-lh.googleusercontent.com/a-/AFdZucqZwKRvgmmnfkU-1kTMb2SrdCU8fUxqTUgoiR4M	It's very motivational and I enjoy collaborating with others so we can encourage each other.	5	1	3.3.2	2021-08-18 23:59:46	Thanks so much for your review. We're happy to hear Habitica and its community have been helpful for you! If you’d like to share any feedback with us directly, you can do that via Menu - About - Support - Send Feedback.	2021-08-25 12:54:03
611	9cb3cf7c-78e9-493d-afc3-dceefd650485	Stormy	https://play-lh.googleusercontent.com/a-/AFdZucqGLHv6hSTi4uNg6i4VedbIwcM3B8VMsyX6-LRUxw	I love it!! only app that geniunly keeps me motivated to do things! I also love how the free version doesnt withhold the basics, and subscription isnt forced [although once I have the money I definetly will be!] The wheelchair option in the avatar is super cool aswell. could never rate it anything other than 5 stars!	5	14	3.3.1	2021-08-15 05:34:08	Thanks so much for your review, rating, and support. It means a lot to us to know Habitica has been so valuable for you! If you’d like to share any feedback with us directly, you can do that via Menu - About - Support - Send Feedback.	2021-08-18 14:03:04
612	f566c437-8b13-4a7a-a2f2-1ccc8d4a9ef2	Nikki S	https://play-lh.googleusercontent.com/a-/AFdZucoyUMVlH_v77uiCg8ilZqUy5w_nB1Y9V1qtArSvCA	I have ADHD. This app has been so helpful! The little hits of dopamine from accomplishing tasks and earning points is exactly what my neurodivergent brain needs. It's cute, it's easy to use. I was able to input all my chores, even annual ones! And input habits I want to encourage or discourage like getting takeout versus eating at home. It glitched on me once. I just closed the app, reopened it, …	5	148	3.3.2	2021-08-14 01:57:42	Hi Nikki! Thanks so much for your review and support. We're happy to hear Habitica has been helpful for you accomplishing your real life adventures! We hope it won't glitch again, but if it does, feel free to let us know via Menu - About - Support- Report a Bug so the team will look into it.	2021-08-18 14:07:41
613	50e69723-480b-43cb-a54e-f84da0004301	24freeplay	https://play-lh.googleusercontent.com/a-/AFdZucpak55Gp8L0eYqrxrfInZCVYskMWOwkhnUMi-9p	Amazing app! Like it!	5	0	3.3.1	2021-08-13 19:11:18	Thanks so much for your review. We're happy to hear Habitica has been helpful for you! If you’d like to share any feedback with us directly, you can do that via Menu - About - Support - Send Feedback.	2021-08-18 14:08:02
614	46580679-f2f3-4930-ba45-de89aa493468	Banodi Hikyu	https://play-lh.googleusercontent.com/a-/AFdZucrzMbL9e7ifeNcSsSOZP8Kodp-DU5KkVQw4NeFgzQ	L. Llp... Lmp 😃😊😃🤗km Loool	5	0		2021-08-13 14:50:15	Thank you for your review and support!	2021-08-13 14:58:24
615	e9563a79-f2c4-4302-9d11-6ddc79b31327	george arellano	https://play-lh.googleusercontent.com/a-/AFdZucowTEkadCZKSthTUzCSC_ID9F6GEemjzrsD0hYEqQ	I love the concept and really want to use the app, however, I don't want my to-do list items to disappear once completed. They need to go into a space for "tasks completed" or something similar, so that they can be referenced if necessary. I will have to use a different checklist until this is possible. Edit: It does in fact save your completed tasks. I just overlooked it. This app is a must have…	5	66	3.3.1	2021-08-13 14:03:34	Hi, George! We're glad you like the app. You can filter your To Do list by active, scheduled, or completed by using the hamburger menu in the upper right of the app. So you can look at your completed to do tasks any time you need to reference one.	2021-08-13 13:48:00
616	f3f7a9a0-2f3f-4007-b793-f1411b1652b4	Lao Karun	https://play-lh.googleusercontent.com/a-/AFdZucoPTd1RWFwr5uFn7RTor2QD_c3bN_AhNYq8c6XHpcw	This took a bit of a while to get into but generally speaking this is a great app if you want to gamify your goals and it has a very helpful wiki and community if you get stuck. I only wish it had a feature to invite friends to join you easily.	5	2	3.3.1	2021-08-13 07:53:53	Thanks so much for your review. We're happy to hear Habitica has been helpful for you! We now have an official suggestion and comment form to help us keep track of what features users want the most. You can find it via Menu - About - Send Feedback if you’d like to add your idea.	2021-08-13 13:43:37
617	c89fa659-3c4e-405d-a50c-9ae4b4885e6f	Louis Honoré Jensen	https://play-lh.googleusercontent.com/a-/AFdZucpueTSFk6bn7l0vDLZnTv0STXk-7DqZ2o9qEOGuoQ	Please make the dailies widget purple again!! Why'd it have to go black/white?:'(	4	0	3.3.1	2021-08-12 15:45:21	Hi Louis! Thanks for your feedback on the widget! We'll pass it on to the mobile team for discussion.	2021-08-13 16:20:55
618	07eef568-3521-4289-bff4-6bb1d0cab450	Ria	https://play-lh.googleusercontent.com/a-/AFdZucoUYXKgXoPbJs8qBiYfXVRH2h6Zp2xfHUWkOLcfcg	I really wish there was an option to complete X/Y per week for tasks. And and option for the todo list for a weekly repeating task to not refresh daily! Besides that very cool concept! Having parties is great for accountability too!	4	0		2021-08-11 21:25:31	Hi Ria! Thank you so much for your review. We're glad you like the accountability features! To Dos are usually one-off tasks, while dailies can repeat. You can set a daily task to repeat on certain days or weekly if you want a repeating task. We have an official suggestion form at Menu - About - Send Feedback if you’d like to add your ideas.	2021-08-13 13:55:52
619	6ee192d8-b737-490e-9165-ac29dfd67282	Jefrey Aquino	https://play-lh.googleusercontent.com/a-/AFdZucqNXAnyW4o381VyBA9XVmMS8puXl1Qw-a6jUHBQ7A	Nice app to take back the control of your life.	5	0		2021-08-11 16:33:57	Hi Jefrey! Thanks so much for your review. We're happy to hear Habitica has been helpful for you in your life! If you’d like to share any feedback with us directly, you can do that via Menu - About - Support - Send Feedback.	2021-08-11 16:16:25
620	b16bfecb-c0b4-49e4-9c67-991839e19213	Frëan	https://play-lh.googleusercontent.com/a-/AFdZucoAA1oWwUvKxjhlzFid-IRgCdMiwEGkZ2HooPKL0A	Awesome app, if only they had a feature for storing data whilst offline, and then syncing it when you go back online, that way you could use it whilst on airplane mode, which I find super helpful for staying productive.. As it is you can only use the app providing you're online at the time.	4	8	3.3.1	2021-08-10 18:01:22	Thank you for your review! We plan to add offline mode in the future. In the meantime, if you’d like to let us know what features you’d use the most offline, you can do so via Menu - About - - Support -Send Feedback.	2021-08-11 16:02:27
621	9c15145b-b1e1-4b2e-a877-3d2c205df2e0	Jeric Baribeau	https://play-lh.googleusercontent.com/a-/AFdZucpSRMCsXSw3k8kUpZw5jT0dsSplEOzsSJnUWsWV8A	This has been such a huge help with remembering tasks and staying on top of things	5	1	3.3.1	2021-08-10 03:05:26	Hi Jeric! Thanks for your review. We're happy to hear Habitica has been so helpful for you with tasks! If you’d like to share any feedback with us directly, you can do that via Menu - About - Support - Send Feedback.	2021-08-11 16:15:35
622	5babd9d4-0ade-457d-abb8-da5b108e8c4d	Adam Demuth	https://play-lh.googleusercontent.com/a/AItbvmmXKukDSyYryVsIxUXy9Swfyc--L1U0V99AyZB4Ig=mo	I want to like Habitica, but I feel like it needs more. Actually, it has more! There are quests that might be fun and motivating, unfortunately you have to join a guild to do so. It seems like one has to sort through a long chat then apply to a guild and then wait... It all sounds like time I could be spending completing my tasks for the day. Devs: Easier guild process.Maybe just a random guild o…	2	7	3.3	2021-08-08 11:28:41	Hi Adam! Thanks for your review! We'll keep your feedback about guilds in mind as we continue to work to improve Habitica. You can contact us directly by going to Menu - About - Support - Send Feedback if you'd like to give us additional details. You can also learn more on the wiki page about guilds: https://habitica.fandom.com/wiki/Guilds	2021-08-11 16:20:00
623	967af387-4400-4aa1-bdb5-b68f2a0fcf04	Toimur Hasan	https://play-lh.googleusercontent.com/a-/AFdZucrNBvGQtSVt4qCgNMUp_50DI0lHOo2WIw8ARr9RYg	Great application.	5	0	3.3	2021-08-08 11:18:40	Hi Toimur! Thanks so much for your review. We're happy to hear Habitica has been helpful for you! If you’d like to share any feedback with us directly, you can do that via Menu - About - Support - Send Feedback.	2021-08-11 16:20:30
624	14c39659-170e-45ee-8b9a-c2f0bf10f734	Cloud H	https://play-lh.googleusercontent.com/a-/AFdZucr4kUn_rZnEmUfASIyLJUIBQvIPvx1y_K7-wg01xM0	So good. Would be nice if there was more armor to buy though.	5	0	3.3	2021-08-06 19:52:37	Thanks so much for your review. We're happy to hear Habitica has been helpful for you! If you’d like to share any feedback with us directly, you can do that via Menu - About - Support - Send Feedback. There will be new armor available for purchase at the next seasonal Gala!	2021-08-11 16:23:01
625	d4e419b3-ebe9-460f-8edc-4d89067c1cb2	Bobbie O'Connor	https://play-lh.googleusercontent.com/a/AItbvml1tGLhMccfpNClQE6dnkd-QXRCA1myo4c3Eee3=mo	Love this app. I use it every day. You can set reminders for one time tasks, and set daily tasks and habits you earn coins/XP for. Makes boring life stuff feel more like a game and I can glance at it and figure out what I still need to do that day. Lot of character customization options without having to spend irl money	5	0	3.1.2	2021-08-06 11:47:54	Thanks so much for your review. We're so happy to hear Habitica has been helpful for you and that you're enjoying your real life adventure! If you’d like to share any feedback with us directly, you can do that via Menu - About - Support - Send Feedback.	2021-08-06 13:14:19
626	0939e0ab-b47b-48e2-8f78-aa13dcb1bafa	Susan Post	https://play-lh.googleusercontent.com/a-/AFdZucrBPV7uexvmB-Q6iHcwGkTC4KJLPiJAlif-U0MdGA	Terrible in app onboarding. Just a simple question of how to check off a task ond they want to send me to their community forum to post a question? Uninstalling.	1	2	3.3	2021-08-04 17:48:14	Hi Susan! Sorry that our welcome tutorial and interface weren't what you were looking for at this time. Thanks for giving us a try.	2021-08-06 13:10:51
627	d2bb400d-c3db-4a1a-af6f-cb7d7f7468b0	cinderelly 0f sPiRiTlAnD	https://play-lh.googleusercontent.com/a/AItbvmnYq9jU5QgC01POYWN1rStNU_YbQLK0ylDRHmTP=mo	Amazing! Helps me remember my tasks and not blow them off. Love the gryphon logo.	5	1	3.3	2021-08-03 13:25:03	Hi! Thanks so much for your review and your suggestion. You're welcome to suggest this via Menu - About - Support - Send Feedback. However, our intent is to keep Habitica ad-free.	2021-08-02 02:25:17
628	51e22f06-2f34-4b11-8c20-f09b54e38412	HGP	https://play-lh.googleusercontent.com/a-/AFdZucrlnRm-shJQna6LIDptY_qF6_OQzZ79uUJdRa_OLw	very nice very nice	5	1	3.3	2021-08-03 11:57:46	Thank you so much for your support! If you’d like to share any feedback with us directly, you can do that via Menu - About - Support - Send Feedback.	2021-08-06 13:05:34
629	1e5608a8-a386-4ab5-b648-ec8df3eb5b75	Alex x	https://play-lh.googleusercontent.com/a-/AFdZucq560_8_1F0cuo8QafjcCXwpeKVEhyUxZtQxP6rHjw	Omg i just love this app! The way it's made and it's designed. I was searching for the "best" app for me (to keep track of my habits and to-dos) and i found the right app for it.	5	1	3.3	2021-08-02 21:17:27	Thanks so much for your review. We're happy to hear Habitica has been so helpful for you and that you love it! If you’d like to share any other feedback with us directly, you can do that via Menu - About - Support - Send Feedback.	2021-08-06 13:03:21
630	a01ef7ae-b465-42bd-8bd4-0f95ea0b47f0	Jec Sugoi	https://play-lh.googleusercontent.com/a-/AFdZucrKY21TTLdYIGNzB7EmfcqKy7fnfPxHHs1QJD0Z	I loveee this app! I'm sure it will motivate me to do my tasks. I just hope there's like a timetable for schedule (idk if there's a timetable already i just downloaded the app) It will be very helpful.	5	4	3.3	2021-08-01 18:44:39	Hi Jec! Thanks so much for your review. We're happy to hear Habitica has been helpful for you! If you’d like to suggest any new features, you can do so via Menu - About - Support - Send Feedback.	2021-08-02 02:23:35
631	46d44de3-16be-4ab3-a599-a5c8e6ef1221	Kirstin Richardson	https://play-lh.googleusercontent.com/a-/AFdZucqP7vPByuYBGmzQrx3RvGlYWUJuIQMS2ipHP_i8TaM	Just got this app today, love it so far. It takes a bit to learn everything there is to it, there's a lot, but worth the time and effort so far!	5	2	3.3	2021-07-31 18:55:59	Hi Kristin! Thanks so much for your review. We're happy to hear that you're enjoying Habitica already!	2021-08-02 02:25:50
632	fb190eb0-f22d-4001-a8e7-e65ed620f10f	Bah Humbug	https://play-lh.googleusercontent.com/a-/AFdZucrzi3HlRuDXA1hJbI-l3San8RG8aqLAq-flVHNf	Really helps for people with depression who like video games. Not perfect but thats okay. Thank you for this.	5	1	3.3	2021-07-31 15:35:57	Thanks so much for your review. We're happy to hear Habitica has been a great tool for you! If you’d like to share any feedback with us directly, you can do that via Menu - About - Support - Send Feedback.	2021-08-02 02:26:13
633	ff8fdb19-adfe-418d-bbcc-cbb79814bc9d	Taegan Lewis	https://play-lh.googleusercontent.com/a-/AFdZucoOq_CnI0eFwXCDSwU2Bp8rrTAy3PvDthYbOZVyVA	I love Habitica!! It makes staying healthy fun. I'm held accountable for getting tasks done, without making me feel pressured. I look forward to doing chores and tasks that u I wouldn't normally, because I know it will help me raise pets, complete quests and more :)	5	9	3.3	2021-07-30 21:17:35	Hi Taegan! Thanks so much for your review. We're happy to hear Habitica has been so helpful for you! Best of luck with those pets and quests!	2021-08-02 02:30:55
634	532b4d3a-6b15-48e9-8b59-5dd2c3a8eebd	Rex Labalan	https://play-lh.googleusercontent.com/a-/AFdZucrP9zUtLBhzY27qCmhab_A-k50GmQdAWA4BvQAxaw	BEWARE OF SJW MODS: you'll be walking on eggshells; they are ban heavy. You're better off with the Any.do app anyway which is way more practical.	1	5		2021-07-29 07:07:53
635	37060715-6590-478b-9b2f-c9cecb860de7	Y Lauzon	https://play-lh.googleusercontent.com/a-/AFdZucqHD3-qgM2RS5e8NdRyAE0xA53khAqZnyDN3tMY4w	This actually works!!!! I'm so happy I found this! I've finished things I needed to do for a while and I feel amazing!!!	5	2	3.3	2021-07-28 02:28:57	Hi! Thanks so much for your review. We're glad to hear Habitica has been helpful for you in your real life adventures! If you’d like to share any feedback with us directly, you can do that via Menu - About - Support - Send Feedback.	2021-07-29 12:20:19
636	b2bc691f-74fa-42a9-9dde-a0a09926d3ff	Laura Paarman	https://play-lh.googleusercontent.com/a-/AFdZucpyIFWTU4NHmbXw8_kmAbH0UOvac2k7P2aAWusKEQ	This app has literally changed my life, if you have any kind of ADHD, mental health or executive function issues, this app gameifies any habit/task you need to complete & I have found it immensely useful to change my behaviour! Also the community and characters are just the cutest. Highly recommend	5	2	3.2.3	2021-07-26 20:57:45	Hi Laura! Thanks for your review and kind words; they mean a lot to us! We are glad you find Habitica to be so useful and you like the art and pets. If you'd like to share any further feedback, please feel free to reach out via Menu - About - Support - Send Feedback.	2021-07-29 12:34:44
637	59cc2b86-9428-41ae-9d30-a8bf56cf9743	Aayaan Noman	https://play-lh.googleusercontent.com/a-/AFdZucpX6igQ6mvU2h0E28xJxL9WaF4fHKJl2LWM_72eAg	Takes a while to add stuff at the start but is useful	4	0		2021-07-25 17:40:54	Hi! Thanks so much for your review. We're happy to hear Habitica has been useful for you! If you’d like to share any feedback with us directly, you can do that via Menu - About - Support - Send Feedback.	2021-07-29 12:17:47
638	f3a4ae45-3bfe-49bd-9b79-c31fa7fac12b	Denis D.	https://play-lh.googleusercontent.com/a-/AFdZucrwu1cVRvPrax9kBLRaKGq2nwHARDULFy1gVu9O	I love this app and the idea so far. But subscription prices are really just too expensive. I would like to support you guys, maybe you could make a subscription for supporters with less cost and less extras.	5	5	3.3	2021-07-24 18:11:15	Hi Denis! We're glad you're enjoying the app. We keep the subscription price as low as we can at $4 a month (oops! math mistake in original reply!). We know not everyone is able to subscribe, so we make sure that enough features are available so a subscription isn't necessary to use the app.	2021-07-30 12:26:58
639	2b683b06-b42e-40c8-a2a6-5490992ba1aa	Richard Allen	https://play-lh.googleusercontent.com/a/AItbvmnId-PcD-2Ck4gBWqZyvQcscnEpgUcYegTUfb8D=mo	It's fun and helps me keep my tasks on track. A little buggy, sometimes it shows no tasks, but restarting fixes it. I wish I could make a periodic task that didn't reset the next day.	4	2	3.3	2021-07-24 13:50:57	Hi Richard! Thank you for your review! The bug you mention was fixed in the most recent app build (version 3.3.1), so you might want to update to the latest version. You can also set tasks to repeat weekly or monthly, which might be helpful for you. We now have a special form for suggestions: Menu - About - Send Feedback.	2021-07-29 03:19:32
640	a71d3fc3-16fb-4f41-8061-cdaace1a6042	Michael Fry	https://play-lh.googleusercontent.com/a-/AFdZucowL7dz5kqhL95d8fCqeZV4DpF1o5C1enr6YaU	I don't want to sign in, I just want to create a list of chores with point values for three people on one device.	1	0		2021-07-23 16:15:06	Thanks for giving Habitica a try. We are sorry we weren't a good fit for your needs at this time.	2021-07-29 03:14:45
641	5bf3cf2e-b638-4594-a53a-dafa2a5a77ad	VFBjesse	https://play-lh.googleusercontent.com/a-/AFdZucoOFC-LM_PpEuALds2i_DcQbjW6a4X2zPWrKfotYg	This app is a great way to keep up with tasks. The leveling mechanic and rpg feel really make it fun. This is the first app I've gotten others to use and got a subscription for.	5	0	3.3	2021-07-21 15:03:39	Hi! Thanks for your review and kind words. They mean a lot to us! It's wonderful that you're finding it to be so useful. If you'd like to share any further feedback, please feel free to reach out via Menu - About - Support - Send Feedback.	2021-07-22 15:35:58
642	b7624bb3-2ae1-44a0-826e-475d7ea8c532	Imrano Static	https://play-lh.googleusercontent.com/a-/AFdZucoQp8yzBnRf6GQg6TntRapH8_k3zJTQY0OKa22F_w	Great app with interactivity to motivate to complete your tasks. But I agree with other comments, really needs a calender view, and it would be perfect	4	3	3.3	2021-07-21 08:53:45	Hi Imrano! Thanks for your review and feedback! We now have an official suggestion and comment form to help us keep track of what features users want the most. You can find it via Menu - About - Send Feedback if you’d like to add your idea about a calendar view.	2021-07-22 15:37:34
643	1e53c052-4854-4f04-a6c8-a7bd884a2a25	Catherine Tran	https://play-lh.googleusercontent.com/a-/AFdZucokGrqnyhVqjXOzNf77GyhKqj1yDsTsmxIEVRA8yks	Good concept but seems a bit buggy so far. The positive/negative setup is not the most intuitive thing to figure out, as well as some other features. While trying to initially set up my tasks, I tried to adjust the streaks, and it would not save my adjustment. So idk. The app could use some more QA I think, & maybe some work on UX? Hoping it all gets better over time. The character creation is cu…	3	48	3.3	2021-07-21 06:04:49	Hi Catherine! Thanks for your review and comments! We're glad you like the avatars and rewards. You can help us fix any bugs you encounter by reporting them directly via Menu - About - Support - Report a Bug.	2021-07-22 15:39:04
644	a43786d1-d891-41ba-9d88-071c68e06b1c	Muhammad Karbalaee	https://play-lh.googleusercontent.com/a-/AFdZucoAqLTJrSN3rSu5E5JREjtxm1C6s9yplSyrrGEeOQ	helps me out. a lotttt	5	0	3.2.4.2	2021-07-21 04:42:54	Hi Muhammad! Thanks so much for your review. We're happy to hear Habitica has been so helpful for you! If you’d like to share any feedback with us directly, you can do that via Menu - About - Support - Send Feedback.	2021-07-22 15:39:31
645	d29ba172-fa61-4015-b334-157260891e5d	Penyuturbo	https://play-lh.googleusercontent.com/a-/AFdZucrsPLCwaaNoMTggajmsSLUdVAnjRAokfI3NDal0	All good but just one problem, why notifications its not pop up.., please consider fix it if a bug	3	1	3.3	2021-07-20 09:15:40	Thank you for the review, but we're sorry to hear about this issue with norifications. Please let us know if you're still having trouble via Menu - About - Support- Report a Bug and the team will look into it.	2021-07-22 15:43:49
646	4e651f24-fbd8-4134-8c20-f40a366efa5f	Jessica Sambola	https://play-lh.googleusercontent.com/a-/AFdZucoSqBvLaCSEyy_ESQ4t-XczhfNBoXGta-gr4dqp	I haven't gotten any fox eggs in about a month and I was really looking forward to finishing them as my first collection 😕	3	0	3.3	2021-07-20 04:19:06	Hi Jessica! Thanks for your review! Keep at the adventuring! The more tasks you complete, the more possibility of getting egg drops. We wish you luck in completing that collection soon.	2021-07-22 15:46:18
647	4ad21c4b-9859-4d7a-bc6f-53a532d1a119	Eric Strick	https://play-lh.googleusercontent.com/a/AItbvmn8wzrbTV2BVpG0efbqpwHvr0pvpllanIEaXhhF=mo	This really is a great app and idea, but it is sorely lacking a calendar view and the ability to schedule a specific time of day for a To-Do to be completed. I would love to plan my days through Habitica, but I literally cannot because this functionality is missing. Please add this! Thank you	3	41	3.3	2021-07-19 14:29:33	Hi Eric! Thanks for your review and feedback! We now have an official suggestion and comment form to help us keep track of what features users want the most. You can find it via Menu - About - Send Feedback if you’d like to add your ideas about calendars and scheduling.	2021-07-22 15:47:02
648	87c3d91d-8c91-4e24-b932-4ee7b0be338c	Tasneem AbdusSamad	https://play-lh.googleusercontent.com/a-/AFdZuco-fGGE5LrF0nZIaqfB8ImIFS_zWTT7lMAsLbhk2Q	I love habitica :3	5	0	3.0	2021-07-19 07:11:50	Hi Tasneem, Thanks so much for your review, we're happy to hear Habitica has been helpful for you! If you’d like to share any feedback with us directly, you can do that via Menu - About - Send Feedback.	2020-10-09 02:15:50
649	7ee48bed-4307-4df6-981b-143e1a29fad4	Kase D	https://play-lh.googleusercontent.com/a-/AFdZucqhnmkpxp6X_n3GLGaGlafdnHht7IAik2TK4waM	This is actually a great app and I find it motivates me to do the things I struggle to do on a daily basis way better than any other methods I've tried. However one really annoying thing is that if you leave the app running in the background and come back to it, none of your tasks will load. You have to exit the app completely to get them to work again. If this gets fixed I will change my rating …	3	1	3.2.4.2	2021-07-18 15:10:26	Hi Kase! Thanks for your review and kind words; they mean a lot to us! Our developers fixed this issue in build version 3.3. Update to the most recent version and keep up that motivation!	2021-07-19 02:10:07
650	f772bfb7-b1fb-4214-87d6-de97165f21c9	Edwin Ng	https://play-lh.googleusercontent.com/a-/AFdZucqk98qezcsxHn1LPs1eEpsTBQ_699vV4Pg5CQoomw	Its amazing app, especially when you found a nice group	5	0	3.2.4.2	2021-07-18 14:17:43	Hi Edwin! Thanks so much for your review. We're happy to hear Habitica has been helpful for you and that you're enjoying the community! If you’d like to share any feedback with us directly, you can do that via Menu - About - Support - Send Feedback.	2021-07-22 15:51:43
[truncated: 206,234+ more rows]
